# Supplementary material for: Network Modeling of Liver Metabolism to Predict Plasma Metabolite Changes During Short-Term Fasting in the Laboratory Rat
Source: Front Physiol. 2019 Mar 1;10:161. doi: 10.3389/fphys.2019.00161 (PMC6405515; doi:10.3389/fphys.2019.00161)
Supplement: TABLE S1 — Rat genome-scale metabolic network reconstruction iRno, with modifications. [file Table_1.XLSX]

## Sheet: metabolites
Abbreviation	Description	Neutral formula	Charged formula	Charge	Compartment	KEGG ID	PubChem ID	ChEBI ID	InChI string	SMILES
m00001[c]	(-)-trans-carveol	C10H16O	C10H16O	0	c	C00964		CHEBI:15389
m00001[s]	(-)-trans-carveol	C10H16O	C10H16O	0	s	C00964		CHEBI:15389
m00002[c]	(+)-alpha-pinene	C10H16	C10H16	0	c	C06306		CHEBI:28261
m00002[s]	(+)-alpha-pinene	C10H16	C10H16	0	s	C06306		CHEBI:28261
m00003[c]	(10Z)-heptadecenoic acid	C17H32O2	C17H32O2	0	c
m00003[l]	(10Z)-heptadecenoic acid	C17H32O2	C17H32O2	0	l
m00003[r]	(10Z)-heptadecenoic acid	C17H32O2	C17H32O2	0	r
m00003[s]	(10Z)-heptadecenoic acid	C17H32O2	C17H32O2	0	s
m00004[c]	(10Z)-heptadecenoyl-CoA	C38H66N7O17P3S	C38H66N7O17P3S	0	c
m00004[m]	(10Z)-heptadecenoyl-CoA	C38H66N7O17P3S	C38H66N7O17P3S	0	m
m00004[r]	(10Z)-heptadecenoyl-CoA	C38H66N7O17P3S	C38H66N7O17P3S	0	r
m00005[c]	(11R)-HPETE	C20H32O4	C20H32O4	0	c	C14820
m00006[c]	(11Z)-docosenoyl-CoA	C43H76N7O17P3S	C43H76N7O17P3S	0	c
m00006[m]	(11Z)-docosenoyl-CoA	C43H76N7O17P3S	C43H76N7O17P3S	0	m
m00006[r]	(11Z)-docosenoyl-CoA	C43H76N7O17P3S	C43H76N7O17P3S	0	r
m00007[c]	(11Z)-eicosenoyl-CoA	C41H72N7O17P3S	C41H72N7O17P3S	0	c	C16530
m00007[m]	(11Z)-eicosenoyl-CoA	C41H72N7O17P3S	C41H72N7O17P3S	0	m	C16530
m00007[p]	(11Z)-eicosenoyl-CoA	C41H72N7O17P3S	C41H72N7O17P3S	0	p	C16530
m00007[r]	(11Z)-eicosenoyl-CoA	C41H72N7O17P3S	C41H72N7O17P3S	0	r	C16530
m00008[c]	(11Z,14Z)-eicosadienoic acid	C20H36O2	C20H36O2	0	c	C16525
m00008[l]	(11Z,14Z)-eicosadienoic acid	C20H36O2	C20H36O2	0	l	C16525
m00008[r]	(11Z,14Z)-eicosadienoic acid	C20H36O2	C20H36O2	0	r	C16525
m00008[s]	(11Z,14Z)-eicosadienoic acid	C20H36O2	C20H36O2	0	s	C16525
m00009[c]	(11Z,14Z)-eicosadienoyl-CoA	C41H70N7O17P3S	C41H70N7O17P3S	0	c	C16180
m00009[m]	(11Z,14Z)-eicosadienoyl-CoA	C41H70N7O17P3S	C41H70N7O17P3S	0	m	C16180
m00009[r]	(11Z,14Z)-eicosadienoyl-CoA	C41H70N7O17P3S	C41H70N7O17P3S	0	r	C16180
m00010[c]	(11Z,14Z,17Z)-eicosatrienoic acid	C20H34O2	C20H34O2	0	c	C16522		CHEBI:53460
m00010[l]	(11Z,14Z,17Z)-eicosatrienoic acid	C20H34O2	C20H34O2	0	l	C16522		CHEBI:53460
m00010[r]	(11Z,14Z,17Z)-eicosatrienoic acid	C20H34O2	C20H34O2	0	r	C16522		CHEBI:53460
m00010[s]	(11Z,14Z,17Z)-eicosatrienoic acid	C20H34O2	C20H34O2	0	s	C16522		CHEBI:53460
m00011[c]	(11Z,14Z,17Z)-eicosatrienoylcarnitine	C27H47NO4	C27H47NO4	0	c
m00011[m]	(11Z,14Z,17Z)-eicosatrienoylcarnitine	C27H47NO4	C27H47NO4	0	m
m00011[r]	(11Z,14Z,17Z)-eicosatrienoylcarnitine	C27H47NO4	C27H47NO4	0	r
m00012[c]	(11Z,14Z,17Z)-eicosatrienoyl-CoA	C41H68N7O17P3S	C41H68N7O17P3S	0	c	C16179
m00012[m]	(11Z,14Z,17Z)-eicosatrienoyl-CoA	C41H68N7O17P3S	C41H68N7O17P3S	0	m	C16179
m00012[r]	(11Z,14Z,17Z)-eicosatrienoyl-CoA	C41H68N7O17P3S	C41H68N7O17P3S	0	r	C16179
m00013[c]	(13E)-11alpha-hydroxy-9,15-dioxoprost-13-enoate	C20H32O5	C20H32O5	0	c	C04654		CHEBI:15548
m00014[p]	(13E)-tetranor-16-carboxy-LTE4	C19H27NO7S	C19H27NO7S	0	p
m00015[p]	(13E)-tetranor-16-oxo-16-CoA-LTE4	C40H61N8O22P3S2	C40H61N8O22P3S2	0	p
m00016[c]	(13Z)-docosenoyl-CoA	C43H76N7O17P3S	C43H76N7O17P3S	0	c	C16531
m00016[m]	(13Z)-docosenoyl-CoA	C43H76N7O17P3S	C43H76N7O17P3S	0	m	C16531
m00016[p]	(13Z)-docosenoyl-CoA	C43H76N7O17P3S	C43H76N7O17P3S	0	p	C16531
m00016[r]	(13Z)-docosenoyl-CoA	C43H76N7O17P3S	C43H76N7O17P3S	0	r	C16531
m00017[c]	(13Z)-eicosenoic acid	C20H38O2	C20H38O2	0	c
m00017[l]	(13Z)-eicosenoic acid	C20H38O2	C20H38O2	0	l
m00017[r]	(13Z)-eicosenoic acid	C20H38O2	C20H38O2	0	r
m00017[s]	(13Z)-eicosenoic acid	C20H38O2	C20H38O2	0	s
m00018[c]	(13Z)-eicosenoyl-CoA	C41H72N7O17P3S	C41H72N7O17P3S	0	c
m00018[m]	(13Z)-eicosenoyl-CoA	C41H72N7O17P3S	C41H72N7O17P3S	0	m
m00018[p]	(13Z)-eicosenoyl-CoA	C41H72N7O17P3S	C41H72N7O17P3S	0	p
m00018[r]	(13Z)-eicosenoyl-CoA	C41H72N7O17P3S	C41H72N7O17P3S	0	r
m00019[c]	(13Z)-octadecenoic acid	C18H34O2	C18H34O2	0	c
m00019[l]	(13Z)-octadecenoic acid	C18H34O2	C18H34O2	0	l
m00019[r]	(13Z)-octadecenoic acid	C18H34O2	C18H34O2	0	r
m00019[s]	(13Z)-octadecenoic acid	C18H34O2	C18H34O2	0	s
m00020[c]	(13Z)-octadecenoyl-CoA	C39H68N7O17P3S	C39H68N7O17P3S	0	c
m00020[m]	(13Z)-octadecenoyl-CoA	C39H68N7O17P3S	C39H68N7O17P3S	0	m
m00020[r]	(13Z)-octadecenoyl-CoA	C39H68N7O17P3S	C39H68N7O17P3S	0	r
m00021[c]	(13Z,16Z)-docosadienoic acid	C22H40O2	C22H40O2	0	c	C16533
m00021[l]	(13Z,16Z)-docosadienoic acid	C22H40O2	C22H40O2	0	l	C16533
m00021[r]	(13Z,16Z)-docosadienoic acid	C22H40O2	C22H40O2	0	r	C16533
m00021[s]	(13Z,16Z)-docosadienoic acid	C22H40O2	C22H40O2	0	s	C16533
m00022[c]	(13Z,16Z)-docosadienoylcarnitine	C29H53NO4	C29H53NO4	0	c
m00022[m]	(13Z,16Z)-docosadienoylcarnitine	C29H53NO4	C29H53NO4	0	m
m00022[r]	(13Z,16Z)-docosadienoylcarnitine	C29H53NO4	C29H53NO4	0	r
m00023[c]	(13Z,16Z)-docosadienoyl-CoA	C43H74N7O17P3S	C43H74N7O17P3S	0	c	C16645
m00023[m]	(13Z,16Z)-docosadienoyl-CoA	C43H74N7O17P3S	C43H74N7O17P3S	0	m	C16645
m00023[r]	(13Z,16Z)-docosadienoyl-CoA	C43H74N7O17P3S	C43H74N7O17P3S	0	r	C16645
m00024[c]	(15Z)-tetracosenoylcarnitine	C31H59NO4	C31H59NO4	0	c
m00024[r]	(15Z)-tetracosenoylcarnitine	C31H59NO4	C31H59NO4	0	r
m00025[c]	(15Z)-tetracosenoyl-CoA	C45H80N7O17P3S	C45H80N7O17P3S	0	c	C16532
m00025[p]	(15Z)-tetracosenoyl-CoA	C45H80N7O17P3S	C45H80N7O17P3S	0	p	C16532
m00025[r]	(15Z)-tetracosenoyl-CoA	C45H80N7O17P3S	C45H80N7O17P3S	0	r	C16532
m00026[m]	(18E)-20-oxo-20-CoA-LTB4	C41H62N7O21P3S	C41H62N7O21P3S	0	m
m00026[p]	(18E)-20-oxo-20-CoA-LTB4	C41H62N7O21P3S	C41H62N7O21P3S	0	p
m00027[p]	(18E)-20-oxo-20-CoA-LTE4	C44H67N8O22P3S2	C44H67N8O22P3S2	0	p
m00028[c]	(18R)-HEPE	C20H30O3	C20H30O3	0	c
m00029[c]	(18R)-hydroxy-(5Z,8Z,11Z,14Z,16E)-eicosapentaenoic acid	C20H30O3	C20H30O3	0	c
m00030[c]	(1aalpha,2beta,3alpha,11calpha)-1a,2,3,11c-tetrahydro-6,11-dimethylbenzo[6,7]phenanthro[3,4-b]oxirene-2,3-diol	C20H18O3	C20H18O3	0	c	C19559
m00031[c]	(1R)-hydroxy-(2R)-glutathionyl-1,2-dihydronaphthalene	C20H25N3O7S	C20H25N3O7S	0	c	C14791
m00032[c]	(1R,2S)-naphthalene 1,2-oxide	C10H8O	C10H8O	0	c	C14786		CHEBI:33998
m00032[s]	(1R,2S)-naphthalene 1,2-oxide	C10H8O	C10H8O	0	s	C14786		CHEBI:33998
m00033[c]	(1S)-hydroxy-(2S)-glutathionyl-1,2-dihydronaphthalene	C20H25N3O7S	C20H25N3O7S	0	c	C14792
m00034[c]	(1S,2R)-naphthalene 1,2-oxide	C10H8O	C10H8O	0	c	C14787
m00035[c]	(24R)-24,25-dihydroxycalciol	C27H44O3	C27H44O3	0	c	C07712		CHEBI:28818
m00035[m]	(24R)-24,25-dihydroxycalciol	C27H44O3	C27H44O3	0	m	C07712		CHEBI:28818
m00035[s]	(24R)-24,25-dihydroxycalciol	C27H44O3	C27H44O3	0	s	C07712		CHEBI:28818
m00036[m]	(24R,25R)3alpha,7alpha,12alpha,24-tetrahydroxy-5beta-cholestanoyl-CoA	C48H80N7O21P3S	C48H80N7O21P3S	0	m	C05450		CHEBI:52050
m00036[p]	(24R,25R)3alpha,7alpha,12alpha,24-tetrahydroxy-5beta-cholestanoyl-CoA	C48H80N7O21P3S	C48H80N7O21P3S	0	p	C05450		CHEBI:52050
m00037[p]	(24R,25R)3alpha,7alpha,24-trihydroxy-5beta-cholestanoyl-CoA	C48H80N7O20P3S	C48H80N7O20P3S	0	p	C05448		CHEBI:27403
m00038[c]	(2E)-decenoyl-[ACP]	C10H17OSR	C10H17OSR	0	c	C05754
m00039[m]	(2E)-decenoyl-CoA	C31H52N7O17P3S	C31H52N7O17P3S	0	m	C05275		CHEBI:10723
m00039[p]	(2E)-decenoyl-CoA	C31H52N7O17P3S	C31H52N7O17P3S	0	p	C05275		CHEBI:10723
m00040[c]	(2E)-docosenoyl-CoA	C43H76N7O17P3S	C43H76N7O17P3S	0	c
m00040[m]	(2E)-docosenoyl-CoA	C43H76N7O17P3S	C43H76N7O17P3S	0	m
m00040[p]	(2E)-docosenoyl-CoA	C43H76N7O17P3S	C43H76N7O17P3S	0	p
m00041[c]	(2E)-dodecenoyl-[ACP]	C12H21OSR	C12H21OSR	0	c	C05758
m00042[m]	(2E)-dodecenoyl-CoA	C33H56N7O17P3S	C33H56N7O17P3S	0	m	C03221		CHEBI:15471
m00042[p]	(2E)-dodecenoyl-CoA	C33H56N7O17P3S	C33H56N7O17P3S	0	p	C03221		CHEBI:15471
m00043[c]	(2E)-eicosenoyl-CoA	C41H72N7O17P3S	C41H72N7O17P3S	0	c
m00043[m]	(2E)-eicosenoyl-CoA	C41H72N7O17P3S	C41H72N7O17P3S	0	m
m00043[p]	(2E)-eicosenoyl-CoA	C41H72N7O17P3S	C41H72N7O17P3S	0	p
m00044[c]	(2E)-heneicosenoyl-CoA	C42H74N7O17P3S	C42H74N7O17P3S	0	c
m00044[m]	(2E)-heneicosenoyl-CoA	C42H74N7O17P3S	C42H74N7O17P3S	0	m
m00045[c]	(2E)-heptadecenoyl-[ACP]	C17H31OSR	C17H31OSR	0	c
m00046[m]	(2E)-heptadecenoyl-CoA	C38H66N7O17P3S	C38H66N7O17P3S	0	m
m00047[c]	(2E)-heptenoyl-[ACP]	C7H11OSR	C7H11OSR	0	c
m00048[m]	(2E)-heptenoyl-CoA	C28H46N7O17P3S	C28H46N7O17P3S	0	m
m00049[c]	(2E)-hexacosenoyl-CoA	C47H84N7O17P3S	C47H84N7O17P3S	0	c
m00049[p]	(2E)-hexacosenoyl-CoA	C47H84N7O17P3S	C47H84N7O17P3S	0	p
m00050[c]	(2E)-hexadecenoyl-[ACP]	C16H29OSR	C16H29OSR	0	c	C05763
m00051[m]	(2E)-hexadecenoyl-CoA	C37H64N7O17P3S	C37H64N7O17P3S	0	m	C05272		CHEBI:28935
m00051[p]	(2E)-hexadecenoyl-CoA	C37H64N7O17P3S	C37H64N7O17P3S	0	p	C05272		CHEBI:28935
m00052[c]	(2E)-hexenoyl-[ACP]	C6H9OSR	C6H9OSR	0	c	C05748
m00053[m]	(2E)-hexenoyl-CoA	C27H44N7O17P3S	C27H44N7O17P3S	0	m	C05271		CHEBI:28706
m00053[p]	(2E)-hexenoyl-CoA	C27H44N7O17P3S	C27H44N7O17P3S	0	p	C05271		CHEBI:28706
m00054[c]	(2E)-nonadecenoyl-CoA	C40H70N7O17P3S	C40H70N7O17P3S	0	c
m00054[m]	(2E)-nonadecenoyl-CoA	C40H70N7O17P3S	C40H70N7O17P3S	0	m
m00055[c]	(2E)-nonenoyl-[ACP]	C9H15OSR	C9H15OSR	0	c
m00056[m]	(2E)-nonenoyl-CoA	C30H50N7O17P3S	C30H50N7O17P3S	0	m
m00057[c]	(2E)-octadecenoyl-CoA	C39H68N7O17P3S	C39H68N7O17P3S	0	c	C16218		CHEBI:50570
m00057[m]	(2E)-octadecenoyl-CoA	C39H68N7O17P3S	C39H68N7O17P3S	0	m	C16218		CHEBI:50570
m00057[p]	(2E)-octadecenoyl-CoA	C39H68N7O17P3S	C39H68N7O17P3S	0	p	C16218		CHEBI:50570
m00058[c]	(2E)-octenoyl-[ACP]	C8H13OSR	C8H13OSR	0	c	C05751
m00059[m]	(2E)-octenoyl-CoA	C29H48N7O17P3S	C29H48N7O17P3S	0	m	C05276		CHEBI:27537
m00059[p]	(2E)-octenoyl-CoA	C29H48N7O17P3S	C29H48N7O17P3S	0	p	C05276		CHEBI:27537
m00060[c]	(2E)-pentadecenoyl-[ACP]	C15H27OSR	C15H27OSR	0	c
m00061[m]	(2E)-pentadecenoyl-CoA	C36H62N7O17P3S	C36H62N7O17P3S	0	m
m00062[c]	(2E)-pentenoyl-[ACP]	C5H7OSR	C5H7OSR	0	c
m00063[m]	(2E)-pentenoyl-CoA	C26H42N7O17P3S	C26H42N7O17P3S	0	m
m00064[c]	(2E)-tetracosenoyl-CoA	C45H80N7O17P3S	C45H80N7O17P3S	0	c
m00064[p]	(2E)-tetracosenoyl-CoA	C45H80N7O17P3S	C45H80N7O17P3S	0	p
m00065[c]	(2E)-tetradecenoyl-[ACP]	C14H25OSR	C14H25OSR	0	c	C05760
m00066[m]	(2E)-tetradecenoyl-CoA	C35H60N7O17P3S	C35H60N7O17P3S	0	m	C05273		CHEBI:27721
m00066[p]	(2E)-tetradecenoyl-CoA	C35H60N7O17P3S	C35H60N7O17P3S	0	p	C05273		CHEBI:27721
m00067[c]	(2E)-tricosenoyl-CoA	C44H78N7O17P3S	C44H78N7O17P3S	0	c
m00068[c]	(2E)-tridecenoyl-[ACP]	C13H23OSR	C13H23OSR	0	c
m00069[m]	(2E)-tridecenoyl-CoA	C34H58N7O17P3S	C34H58N7O17P3S	0	m
m00070[c]	(2E)-undecenoyl-[ACP]	C11H19OSR	C11H19OSR	0	c
m00071[m]	(2E)-undecenoyl-CoA	C32H54N7O17P3S	C32H54N7O17P3S	0	m
m00072[m]	(2E,4Z,7Z,10Z)-hexadecatetraenoyl-CoA	C37H58N7O17P3S	C37H58N7O17P3S	0	m
m00072[p]	(2E,4Z,7Z,10Z)-hexadecatetraenoyl-CoA	C37H58N7O17P3S	C37H58N7O17P3S	0	p
m00073[m]	(2E,6Z,9Z,12Z)-octadecatetraenoyl-CoA	C39H62N7O17P3S	C39H62N7O17P3S	0	m
m00073[p]	(2E,6Z,9Z,12Z)-octadecatetraenoyl-CoA	C39H62N7O17P3S	C39H62N7O17P3S	0	p
m00074[c]	(2E,7Z,10Z,13Z,16Z)-docosapentaenoyl-CoA	C43H68N7O17P3S	C43H68N7O17P3S	0	c
m00075[p]	(2R)-pristanoyl-CoA	C40H72N7O17P3S	C40H72N7O17P3S	0	p			CHEBI:20067;CHEBI:10983
m00076[p]	(2R,6R,10R)-trimethyl-hendecanoyl-CoA	C35H62N7O17P3S	C35H62N7O17P3S	0	p
m00077[p]	(2R,6S,10S)-pristanate	C19H38O2	C19H38O2	0	p
m00078[p]	(2S)-pristanoyl-CoA	C40H72N7O17P3S	C40H72N7O17P3S	0	p			CHEBI:64039
m00079[p]	(2S,6R,10R)-trimethyl-(2E)-hendecenoyl-CoA	C35H60N7O17P3S	C35H60N7O17P3S	0	p
m00080[p]	(2S,6R,10R)-trimethyl-hendecanoyl-CoA	C35H62N7O17P3S	C35H62N7O17P3S	0	p
m00081[m]	(3S)-3-hydroxy-cis,cis-palmito-7,10-dienoyl-CoA	C37H62N7O18P3S	C37H62N7O18P3S	0	m
m00081[p]	(3S)-3-hydroxy-cis,cis-palmito-7,10-dienoyl-CoA	C37H62N7O18P3S	C37H62N7O18P3S	0	p
m00082[m]	(3S)-3-hydroxydodec-cis-6-enoyl-CoA	C33H56N7O18P3S	C33H56N7O18P3S	0	m
m00082[p]	(3S)-3-hydroxydodec-cis-6-enoyl-CoA	C33H56N7O18P3S	C33H56N7O18P3S	0	p
m00083[m]	(3S)-3-hydroxylinoleoyl-CoA	C39H66N7O18P3S	C39H66N7O18P3S	0	m
m00083[p]	(3S)-3-hydroxylinoleoyl-CoA	C39H66N7O18P3S	C39H66N7O18P3S	0	p
m00084[m]	(3S)-citramalyl-CoA	C26H42N7O20P3S	C26H42N7O20P3S	0	m	C01011		CHEBI:36882
m00085[c]	(3S)-hydroxy-docasa-cis,cis-13,16-dienoyl-CoA	C43H74N7O18P3S	C43H74N7O18P3S	0	c
m00086[c]	(3S)-hydroxy-eicosa-cis,cis,cis-11,14,17-trienoyl-CoA	C41H68N7O18P3S	C41H68N7O18P3S	0	c
m00087[c]	(3S)-hydroxy-eicosa-cis,cis-11,14-dienoyl-CoA	C41H70N7O18P3S	C41H70N7O18P3S	0	c
m00088[m]	(3Z)-dodecenoyl-CoA	C33H56N7O17P3S	C33H56N7O17P3S	0	m	C02944		CHEBI:27989
m00088[p]	(3Z)-dodecenoyl-CoA	C33H56N7O17P3S	C33H56N7O17P3S	0	p	C02944		CHEBI:27989
m00089[m]	(3Z,7Z,10Z)-hexadecatrienoyl-CoA	C37H60N7O17P3S	C37H60N7O17P3S	0	m
m00089[p]	(3Z,7Z,10Z)-hexadecatrienoyl-CoA	C37H60N7O17P3S	C37H60N7O17P3S	0	p
m00090[p]	(4R,8R,12R)-trimethyl-(2E)-tridecenoyl-CoA	C37H64N7O17P3S	C37H64N7O17P3S	0	p
m00091[m]	(4Z,7Z,10Z)-hexadecatrienoyl-CoA	C37H60N7O17P3S	C37H60N7O17P3S	0	m
m00091[p]	(4Z,7Z,10Z)-hexadecatrienoyl-CoA	C37H60N7O17P3S	C37H60N7O17P3S	0	p
m00092[c]	(4Z,7Z,10Z,13Z,16Z)-docosapentaenoylcarnitine	C29H47NO4	C29H47NO4	0	c
m00092[m]	(4Z,7Z,10Z,13Z,16Z)-docosapentaenoylcarnitine	C29H47NO4	C29H47NO4	0	m
m00092[r]	(4Z,7Z,10Z,13Z,16Z)-docosapentaenoylcarnitine	C29H47NO4	C29H47NO4	0	r
m00093[c]	(4Z,7Z,10Z,13Z,16Z)-docosapentaenoyl-CoA	C43H68N7O17P3S	C43H68N7O17P3S	0	c	C16173
m00093[m]	(4Z,7Z,10Z,13Z,16Z)-docosapentaenoyl-CoA	C43H68N7O17P3S	C43H68N7O17P3S	0	m	C16173
m00093[p]	(4Z,7Z,10Z,13Z,16Z)-docosapentaenoyl-CoA	C43H68N7O17P3S	C43H68N7O17P3S	0	p	C16173
m00093[r]	(4Z,7Z,10Z,13Z,16Z)-docosapentaenoyl-CoA	C43H68N7O17P3S	C43H68N7O17P3S	0	r	C16173
m00094[c]	(4Z,7Z,10Z,13Z,16Z)-DPA	C22H34O2	C22H34O2	0	c			CHEBI:65136
m00094[l]	(4Z,7Z,10Z,13Z,16Z)-DPA	C22H34O2	C22H34O2	0	l			CHEBI:65136
m00094[r]	(4Z,7Z,10Z,13Z,16Z)-DPA	C22H34O2	C22H34O2	0	r			CHEBI:65136
m00094[s]	(4Z,7Z,10Z,13Z,16Z)-DPA	C22H34O2	C22H34O2	0	s			CHEBI:65136
m00095[c]	(4Z,7Z,10Z,13Z,16Z,19Z)-docosahexaenoyl-CoA	C43H66N7O17P3S	C43H66N7O17P3S	0	c	C16169		CHEBI:65132
m00095[m]	(4Z,7Z,10Z,13Z,16Z,19Z)-docosahexaenoyl-CoA	C43H66N7O17P3S	C43H66N7O17P3S	0	m	C16169		CHEBI:65132
m00095[p]	(4Z,7Z,10Z,13Z,16Z,19Z)-docosahexaenoyl-CoA	C43H66N7O17P3S	C43H66N7O17P3S	0	p	C16169		CHEBI:65132
m00095[r]	(4Z,7Z,10Z,13Z,16Z,19Z)-docosahexaenoyl-CoA	C43H66N7O17P3S	C43H66N7O17P3S	0	r	C16169		CHEBI:65132
m00096[c]	(5)ppPur-mRNA	C10H19O16P3R2(C5H8O6PR)n	C10H19O16P3R2(C5H8O6PR)n	0	c	C02100
m00097[s]	(5-L-glutamyl)-L-amino acid	C8H14N2O5	C8H14N2O5	0	s	C03740
m00098[c]	(5S,6S)-epoxy-(15R)-hydroxy-ETE	C20H30O4	C20H30O4	0	c
m00098[p]	(5S,6S)-epoxy-(15R)-hydroxy-ETE	C20H30O4	C20H30O4	0	p
m00098[r]	(5S,6S)-epoxy-(15R)-hydroxy-ETE	C20H30O4	C20H30O4	0	r
m00099[m]	(5Z)-dodecenoyl-CoA	C33H56N7O17P3S	C33H56N7O17P3S	0	m
m00099[p]	(5Z)-dodecenoyl-CoA	C33H56N7O17P3S	C33H56N7O17P3S	0	p
m00100[c]	(5Z,8Z,11Z)-eicosatrienoylcarnitine	C27H47NO4	C27H47NO4	0	c
m00100[m]	(5Z,8Z,11Z)-eicosatrienoylcarnitine	C27H47NO4	C27H47NO4	0	m
m00100[r]	(5Z,8Z,11Z)-eicosatrienoylcarnitine	C27H47NO4	C27H47NO4	0	r
m00101[c]	(5Z,8Z,11Z)-eicosatrienoyl-CoA	C41H68N7O17P3S	C41H68N7O17P3S	0	c
m00101[m]	(5Z,8Z,11Z)-eicosatrienoyl-CoA	C41H68N7O17P3S	C41H68N7O17P3S	0	m
m00101[r]	(5Z,8Z,11Z)-eicosatrienoyl-CoA	C41H68N7O17P3S	C41H68N7O17P3S	0	r
m00102[c]	(5Z,8Z,11Z,14Z,17Z)-eicosapentaenoylcarnitine	C27H43NO4	C27H43NO4	0	c
m00102[m]	(5Z,8Z,11Z,14Z,17Z)-eicosapentaenoylcarnitine	C27H43NO4	C27H43NO4	0	m
m00102[r]	(5Z,8Z,11Z,14Z,17Z)-eicosapentaenoylcarnitine	C27H43NO4	C27H43NO4	0	r
m00103[c]	(5Z,8Z,11Z,14Z,17Z)-eicosapentaenoyl-CoA	C41H64N7O17P3S	C41H64N7O17P3S	0	c	C16165
m00103[m]	(5Z,8Z,11Z,14Z,17Z)-eicosapentaenoyl-CoA	C41H64N7O17P3S	C41H64N7O17P3S	0	m	C16165
m00103[r]	(5Z,8Z,11Z,14Z,17Z)-eicosapentaenoyl-CoA	C41H64N7O17P3S	C41H64N7O17P3S	0	r	C16165
m00104[c]	(6Z,9Z)-octadecadienoic acid	C18H32O2	C18H32O2	0	c
m00104[l]	(6Z,9Z)-octadecadienoic acid	C18H32O2	C18H32O2	0	l
m00104[r]	(6Z,9Z)-octadecadienoic acid	C18H32O2	C18H32O2	0	r
m00104[s]	(6Z,9Z)-octadecadienoic acid	C18H32O2	C18H32O2	0	s
m00105[c]	(6Z,9Z)-octadecadienoylcarnitine	C25H45NO4	C25H45NO4	0	c
m00105[m]	(6Z,9Z)-octadecadienoylcarnitine	C25H45NO4	C25H45NO4	0	m
m00105[r]	(6Z,9Z)-octadecadienoylcarnitine	C25H45NO4	C25H45NO4	0	r
m00106[c]	(6Z,9Z)-octadecadienoyl-CoA	C39H66N7O17P3S	C39H66N7O17P3S	0	c
m00106[m]	(6Z,9Z)-octadecadienoyl-CoA	C39H66N7O17P3S	C39H66N7O17P3S	0	m
m00106[r]	(6Z,9Z)-octadecadienoyl-CoA	C39H66N7O17P3S	C39H66N7O17P3S	0	r
m00107[c]	(6Z,9Z,12Z,15Z)-octadecatetraenoylcarnitine	C25H41NO4	C25H41NO4	0	c
m00107[m]	(6Z,9Z,12Z,15Z)-octadecatetraenoylcarnitine	C25H41NO4	C25H41NO4	0	m
m00107[r]	(6Z,9Z,12Z,15Z)-octadecatetraenoylcarnitine	C25H41NO4	C25H41NO4	0	r
m00108[c]	(6Z,9Z,12Z,15Z)-octadecatetraenoyl-CoA	C39H62N7O17P3S	C39H62N7O17P3S	0	c	C16163		CHEBI:63545
m00108[m]	(6Z,9Z,12Z,15Z)-octadecatetraenoyl-CoA	C39H62N7O17P3S	C39H62N7O17P3S	0	m	C16163		CHEBI:63545
m00108[r]	(6Z,9Z,12Z,15Z)-octadecatetraenoyl-CoA	C39H62N7O17P3S	C39H62N7O17P3S	0	r	C16163		CHEBI:63545
m00109[c]	(6Z,9Z,12Z,15Z,18Z)-tetracosapentaenoylcarnitine	C31H51NO4	C31H51NO4	0	c
m00109[r]	(6Z,9Z,12Z,15Z,18Z)-tetracosapentaenoylcarnitine	C31H51NO4	C31H51NO4	0	r
m00110[c]	(6Z,9Z,12Z,15Z,18Z)-tetracosapentaenoyl-CoA	C45H72N7O17P3S	C45H72N7O17P3S	0	c	C16172		CHEBI:63546
m00110[p]	(6Z,9Z,12Z,15Z,18Z)-tetracosapentaenoyl-CoA	C45H72N7O17P3S	C45H72N7O17P3S	0	p	C16172		CHEBI:63546
m00110[r]	(6Z,9Z,12Z,15Z,18Z)-tetracosapentaenoyl-CoA	C45H72N7O17P3S	C45H72N7O17P3S	0	r	C16172		CHEBI:63546
m00111[c]	(6Z,9Z,12Z,15Z,18Z)-TPA	C24H38O2	C24H38O2	0	c
m00111[l]	(6Z,9Z,12Z,15Z,18Z)-TPA	C24H38O2	C24H38O2	0	l
m00111[r]	(6Z,9Z,12Z,15Z,18Z)-TPA	C24H38O2	C24H38O2	0	r
m00111[s]	(6Z,9Z,12Z,15Z,18Z)-TPA	C24H38O2	C24H38O2	0	s
m00112[c]	(6Z,9Z,12Z,15Z,18Z,21Z)-tetracosahexaenoylcarnitine	C31H49NO4	C31H49NO4	0	c
m00112[r]	(6Z,9Z,12Z,15Z,18Z,21Z)-tetracosahexaenoylcarnitine	C31H49NO4	C31H49NO4	0	r
m00113[c]	(6Z,9Z,12Z,15Z,18Z,21Z)-tetracosahexaenoyl-CoA	C45H70N7O17P3S	C45H70N7O17P3S	0	c	C16168
m00113[p]	(6Z,9Z,12Z,15Z,18Z,21Z)-tetracosahexaenoyl-CoA	C45H70N7O17P3S	C45H70N7O17P3S	0	p	C16168
m00113[r]	(6Z,9Z,12Z,15Z,18Z,21Z)-tetracosahexaenoyl-CoA	C45H70N7O17P3S	C45H70N7O17P3S	0	r	C16168
m00114[c]	(6Z,9Z,12Z,15Z,18Z,21Z)-THA	C24H36O2	C24H36O2	0	c
m00114[l]	(6Z,9Z,12Z,15Z,18Z,21Z)-THA	C24H36O2	C24H36O2	0	l
m00114[r]	(6Z,9Z,12Z,15Z,18Z,21Z)-THA	C24H36O2	C24H36O2	0	r
m00114[s]	(6Z,9Z,12Z,15Z,18Z,21Z)-THA	C24H36O2	C24H36O2	0	s
m00115[c]	(7Z)-octadecenoic acid	C18H34O2	C18H34O2	0	c
m00115[l]	(7Z)-octadecenoic acid	C18H34O2	C18H34O2	0	l
m00115[r]	(7Z)-octadecenoic acid	C18H34O2	C18H34O2	0	r
m00115[s]	(7Z)-octadecenoic acid	C18H34O2	C18H34O2	0	s
m00116[c]	(7Z)-octadecenoyl-CoA	C39H68N7O17P3S	C39H68N7O17P3S	0	c
m00116[m]	(7Z)-octadecenoyl-CoA	C39H68N7O17P3S	C39H68N7O17P3S	0	m
m00116[r]	(7Z)-octadecenoyl-CoA	C39H68N7O17P3S	C39H68N7O17P3S	0	r
m00117[c]	(7Z)-tetradecenoic acid	C14H26O2	C14H26O2	0	c			CHEBI:53206
m00117[l]	(7Z)-tetradecenoic acid	C14H26O2	C14H26O2	0	l			CHEBI:53206
m00117[r]	(7Z)-tetradecenoic acid	C14H26O2	C14H26O2	0	r			CHEBI:53206
m00117[s]	(7Z)-tetradecenoic acid	C14H26O2	C14H26O2	0	s			CHEBI:53206
m00118[c]	(7Z)-tetradecenoyl-CoA	C35H60N7O17P3S	C35H60N7O17P3S	0	c
m00118[m]	(7Z)-tetradecenoyl-CoA	C35H60N7O17P3S	C35H60N7O17P3S	0	m
m00118[p]	(7Z)-tetradecenoyl-CoA	C35H60N7O17P3S	C35H60N7O17P3S	0	p
m00118[r]	(7Z)-tetradecenoyl-CoA	C35H60N7O17P3S	C35H60N7O17P3S	0	r
m00119[c]	(7Z,10Z,13Z,16Z)-docosatetraenoyl-CoA	C43H70N7O17P3S	C43H70N7O17P3S	0	c	C16170		CHEBI:63544
m00119[m]	(7Z,10Z,13Z,16Z)-docosatetraenoyl-CoA	C43H70N7O17P3S	C43H70N7O17P3S	0	m	C16170		CHEBI:63544
m00119[r]	(7Z,10Z,13Z,16Z)-docosatetraenoyl-CoA	C43H70N7O17P3S	C43H70N7O17P3S	0	r	C16170		CHEBI:63544
m00120[c]	(7Z,10Z,13Z,16Z,19Z)-docosapentaenoylcarnitine	C29H47NO4	C29H47NO4	0	c
m00120[m]	(7Z,10Z,13Z,16Z,19Z)-docosapentaenoylcarnitine	C29H47NO4	C29H47NO4	0	m
m00120[r]	(7Z,10Z,13Z,16Z,19Z)-docosapentaenoylcarnitine	C29H47NO4	C29H47NO4	0	r
m00121[c]	(7Z,10Z,13Z,16Z,19Z)-docosapentaenoyl-CoA	C43H68N7O17P3S	C43H68N7O17P3S	0	c	C16166		CHEBI:63541
m00121[m]	(7Z,10Z,13Z,16Z,19Z)-docosapentaenoyl-CoA	C43H68N7O17P3S	C43H68N7O17P3S	0	m	C16166		CHEBI:63541
m00121[r]	(7Z,10Z,13Z,16Z,19Z)-docosapentaenoyl-CoA	C43H68N7O17P3S	C43H68N7O17P3S	0	r	C16166		CHEBI:63541
m00122[c]	(8Z,11Z)-eicosadienoylcarnitine	C27H49NO4	C27H49NO4	0	c
m00122[m]	(8Z,11Z)-eicosadienoylcarnitine	C27H49NO4	C27H49NO4	0	m
m00122[r]	(8Z,11Z)-eicosadienoylcarnitine	C27H49NO4	C27H49NO4	0	r
m00123[c]	(8Z,11Z)-eicosadienoyl-CoA	C41H70N7O17P3S	C41H70N7O17P3S	0	c
m00123[m]	(8Z,11Z)-eicosadienoyl-CoA	C41H70N7O17P3S	C41H70N7O17P3S	0	m
m00123[r]	(8Z,11Z)-eicosadienoyl-CoA	C41H70N7O17P3S	C41H70N7O17P3S	0	r
m00124[c]	(8Z,11Z,14Z,17Z)-eicosatetraenoylcarnitine	C27H45NO4	C27H45NO4	0	c
m00124[m]	(8Z,11Z,14Z,17Z)-eicosatetraenoylcarnitine	C27H45NO4	C27H45NO4	0	m
m00124[r]	(8Z,11Z,14Z,17Z)-eicosatetraenoylcarnitine	C27H45NO4	C27H45NO4	0	r
m00125[c]	(8Z,11Z,14Z,17Z)-eicosatetraenoyl-CoA	C41H66N7O17P3S	C41H66N7O17P3S	0	c	C16164
m00125[m]	(8Z,11Z,14Z,17Z)-eicosatetraenoyl-CoA	C41H66N7O17P3S	C41H66N7O17P3S	0	m	C16164
m00125[r]	(8Z,11Z,14Z,17Z)-eicosatetraenoyl-CoA	C41H66N7O17P3S	C41H66N7O17P3S	0	r	C16164
m00126[c]	(9E)-octadecenoylcarnitine	C25H47NO4	C25H47NO4	0	c
m00126[m]	(9E)-octadecenoylcarnitine	C25H47NO4	C25H47NO4	0	m
m00126[r]	(9E)-octadecenoylcarnitine	C25H47NO4	C25H47NO4	0	r
m00127[c]	(9E)-octadecenoyl-CoA	C39H68N7O17P3S	C39H68N7O17P3S	0	c
m00127[m]	(9E)-octadecenoyl-CoA	C39H68N7O17P3S	C39H68N7O17P3S	0	m
m00127[r]	(9E)-octadecenoyl-CoA	C39H68N7O17P3S	C39H68N7O17P3S	0	r
m00128[c]	(9E)-tetradecenoic acid	C14H26O2	C14H26O2	0	c
m00128[l]	(9E)-tetradecenoic acid	C14H26O2	C14H26O2	0	l
m00128[r]	(9E)-tetradecenoic acid	C14H26O2	C14H26O2	0	r
m00128[s]	(9E)-tetradecenoic acid	C14H26O2	C14H26O2	0	s
m00129[c]	(9E)-tetradecenoyl-CoA	C35H60N7O17P3S	C35H60N7O17P3S	0	c
m00129[m]	(9E)-tetradecenoyl-CoA	C35H60N7O17P3S	C35H60N7O17P3S	0	m
m00129[r]	(9E)-tetradecenoyl-CoA	C35H60N7O17P3S	C35H60N7O17P3S	0	r
m00130[c]	(9Z,12Z,15Z,18Z)-tetracosatetraenoylcarnitine	C31H53NO4	C31H53NO4	0	c
m00130[r]	(9Z,12Z,15Z,18Z)-tetracosatetraenoylcarnitine	C31H53NO4	C31H53NO4	0	r
m00131[c]	(9Z,12Z,15Z,18Z)-tetracosatetraenoyl-CoA	C45H74N7O17P3S	C45H74N7O17P3S	0	c	C16171		CHEBI:63548
m00131[p]	(9Z,12Z,15Z,18Z)-tetracosatetraenoyl-CoA	C45H74N7O17P3S	C45H74N7O17P3S	0	p	C16171		CHEBI:63548
m00131[r]	(9Z,12Z,15Z,18Z)-tetracosatetraenoyl-CoA	C45H74N7O17P3S	C45H74N7O17P3S	0	r	C16171		CHEBI:63548
m00132[c]	(9Z,12Z,15Z,18Z)-TTA	C24H40O2	C24H40O2	0	c
m00132[l]	(9Z,12Z,15Z,18Z)-TTA	C24H40O2	C24H40O2	0	l
m00132[r]	(9Z,12Z,15Z,18Z)-TTA	C24H40O2	C24H40O2	0	r
m00132[s]	(9Z,12Z,15Z,18Z)-TTA	C24H40O2	C24H40O2	0	s
m00133[c]	(9Z,12Z,15Z,18Z,21Z)-tetracosapentaenoylcarnitine	C31H51NO4	C31H51NO4	0	c
m00133[r]	(9Z,12Z,15Z,18Z,21Z)-tetracosapentaenoylcarnitine	C31H51NO4	C31H51NO4	0	r
m00134[c]	(9Z,12Z,15Z,18Z,21Z)-tetracosapentaenoyl-CoA	C45H72N7O17P3S	C45H72N7O17P3S	0	c	C16167		CHEBI:63543
m00134[p]	(9Z,12Z,15Z,18Z,21Z)-tetracosapentaenoyl-CoA	C45H72N7O17P3S	C45H72N7O17P3S	0	p	C16167		CHEBI:63543
m00134[r]	(9Z,12Z,15Z,18Z,21Z)-tetracosapentaenoyl-CoA	C45H72N7O17P3S	C45H72N7O17P3S	0	r	C16167		CHEBI:63543
m00135[c]	(9Z,12Z,15Z,18Z,21Z)-TPA	C24H38O2	C24H38O2	0	c
m00135[l]	(9Z,12Z,15Z,18Z,21Z)-TPA	C24H38O2	C24H38O2	0	l
m00135[r]	(9Z,12Z,15Z,18Z,21Z)-TPA	C24H38O2	C24H38O2	0	r
m00135[s]	(9Z,12Z,15Z,18Z,21Z)-TPA	C24H38O2	C24H38O2	0	s
m00136[c]	(ADP-D-ribosyl)n+1-acceptor			0	c	C03245
m00137[c]	(ADP-D-ribosyl)n-acceptor			0	c	C03245
m00138[g]	(alpha-D-Glucosyl)-(alpha-D-mannosyl)8-beta-D-mannosyl-diacetylchitobiosyl-L-asparagine (protein)	C76H127N2O60X	C76H127N2O60X	0	g
m00138[r]	(alpha-D-Glucosyl)-(alpha-D-mannosyl)8-beta-D-mannosyl-diacetylchitobiosyl-L-asparagine (protein)	C76H127N2O60X	C76H127N2O60X	0	r
m00139[g]	(alpha-D-Glucosyl)2-(alpha-D-mannosyl)8-beta-D-mannosyl-diacetylchitobiosyl-L-asparagine (protein)	C82H137N2O65X	C82H137N2O65X	0	g
m00139[r]	(alpha-D-Glucosyl)2-(alpha-D-mannosyl)8-beta-D-mannosyl-diacetylchitobiosyl-L-asparagine (protein)	C82H137N2O65X	C82H137N2O65X	0	r
m00140[g]	(alpha-D-Glucosyl)3-(alpha-D-mannosyl)8-beta-D-mannosyl-diacetylchitobiosyl-L-asparagine (protein)	C88H147N2O70X	C88H147N2O70X	0	g
m00140[r]	(alpha-D-Glucosyl)3-(alpha-D-mannosyl)8-beta-D-mannosyl-diacetylchitobiosyl-L-asparagine (protein)	C88H147N2O70X	C88H147N2O70X	0	r
m00141[l]	(alpha-D-mannosyl)2-beta-D-mannosyl-N-acetylglucosamine	C26H45NO21	C26H45NO21	0	l
m00142[g]	(alpha-D-mannosyl)4-beta-D-mannosyl-diacetylchitobiosyl-L-asparagine (protein)	C46H77N2O35X	C46H77N2O35X	0	g
m00143[g]	(alpha-D-mannosyl)5-beta-D-mannosyl-diacetylchitobiosyl-L-asparagine (protein) (B1)	C52H87N2O40X	C52H87N2O40X	0	g
m00144[g]	(alpha-D-mannosyl)5-beta-D-mannosyl-diacetylchitobiosyl-L-asparagine (protein) (B2)	C52H87N2O40X	C52H87N2O40X	0	g
m00145[g]	(alpha-D-mannosyl)5-beta-D-mannosyl-diacetylchitobiosyl-L-asparagine (protein) (C)	C52H87N2O40X	C52H87N2O40X	0	g
m00146[g]	(alpha-D-mannosyl)6-beta-D-mannosyl-diacetylchitobiosyl-L-asparagine (protein) (A)	C58H97N2O45X	C58H97N2O45X	0	g
m00147[g]	(alpha-D-mannosyl)6-beta-D-mannosyl-diacetylchitobiosyl-L-asparagine (protein) (B1)	C58H97N2O45X	C58H97N2O45X	0	g
m00148[g]	(alpha-D-mannosyl)6-beta-D-mannosyl-diacetylchitobiosyl-L-asparagine (protein) (B2)	C58H97N2O45X	C58H97N2O45X	0	g
m00149[g]	(alpha-D-mannosyl)6-beta-D-mannosyl-diacetylchitobiosyl-L-asparagine (protein) (C)	C58H97N2O45X	C58H97N2O45X	0	g
m00150[g]	(alpha-D-mannosyl)7-beta-D-mannosyl-diacetylchitobiosyl-L-asparagine, isoform A (protein)	C64H107N2O50X	C64H107N2O50X	0	g
m00151[g]	(alpha-D-mannosyl)7-beta-D-mannosyl-diacetylchitobiosyl-L-asparagine, isoform B (protein)	C64H107N2O50X	C64H107N2O50X	0	g
m00151[r]	(alpha-D-mannosyl)7-beta-D-mannosyl-diacetylchitobiosyl-L-asparagine, isoform B (protein)	C64H107N2O50X	C64H107N2O50X	0	r
m00152[g]	(alpha-D-mannosyl)7-beta-D-mannosyl-diacetylchitobiosyl-L-asparagine, isoform C (protein)	C64H107N2O50X	C64H107N2O50X	0	g
m00153[g]	(alpha-D-mannosyl)8-beta-D-mannosyl-diacetylchitobiosyl-L-asparagine (protein)	C70H117N2O55X	C70H117N2O55X	0	g
m00153[r]	(alpha-D-mannosyl)8-beta-D-mannosyl-diacetylchitobiosyl-L-asparagine (protein)	C70H117N2O55X	C70H117N2O55X	0	r
m00154[r]	(Glc)3 (GlcNAc)2 (Man)9 (PP-Dol)1	(Glc)3(GlcNAc)2(Man)9(PP-Dol)1	(Glc)3(GlcNAc)2(Man)9(PP-Dol)1	0	r	G00008
m00155[c]	(indol-3-yl)acetamide	C10H10N2O	C10H10N2O	0	c	C02693
m00156[c]	(R)-1,2-dimethyl-5,6-dihydroxy-tetrahydroisoquinoline	C11H15NO2	C11H15NO2	0	c
m00157[c]	(R)-3-hydroxybutanoate	C4H8O3	C4H8O3	0	c	C01089		CHEBI:10983;CHEBI:17066
m00157[m]	(R)-3-hydroxybutanoate	C4H8O3	C4H8O3	0	m	C01089		CHEBI:10983;CHEBI:17066
m00157[s]	(R)-3-hydroxybutanoate	C4H8O3	C4H8O3	0	s	C01089		CHEBI:10983;CHEBI:17066
m00158[c]	(R)-3-hydroxybutanoyl-[ACP]	C4H7O2SR	C4H7O2SR	0	c	C04618
m00159[m]	(R)-3-hydroxybutanoyl-CoA	C25H42N7O18P3S	C25H42N7O18P3S	0	m	C03561		CHEBI:15452
m00160[c]	(R)-3-hydroxydecanoyl-[ACP]	C10H19O2SR	C10H19O2SR	0	c	C04619
m00161[c]	(R)-3-hydroxyoctanoyl-[ACP]	C8H15O2SR	C8H15O2SR	0	c	C04620
m00162[c]	(R)-3-hydroxypalmitoyl-[ACP]	C16H31O2SR	C16H31O2SR	0	c	C04633
m00163[c]	(R)-4-phosphopantothenoyl-cysteine	C12H23N2O9PS	C12H23N2O9PS	0	c	C04352		CHEBI:15769
m00163[m]	(R)-4-phosphopantothenoyl-cysteine	C12H23N2O9PS	C12H23N2O9PS	0	m	C04352		CHEBI:15769
m00164[c]	(R)-5-diphosphomevalonate	C6H14O10P2	C6H14O10P2	0	c	C01143		CHEBI:15899
m00165[c]	(R)-5-phosphomevalonate	C6H13O7P	C6H13O7P	0	c	C01107		CHEBI:17436
m00166[m]	(R)-methylmalonyl-CoA	C25H40N7O19P3S	C25H40N7O19P3S	0	m	C01213		CHEBI:15465
m00167[c]	(R)-mevalonate	C6H12O4	C6H12O4	0	c	C00418		CHEBI:17710;CHEBI:28880
m00167[p]	(R)-mevalonate	C6H12O4	C6H12O4	0	p	C00418		CHEBI:17710;CHEBI:28880
m00168[c]	(R)-S-lactoylglutathione	C13H21N3O8S	C13H21N3O8S	0	c	C03451		CHEBI:15694
m00168[m]	(R)-S-lactoylglutathione	C13H21N3O8S	C13H21N3O8S	0	m	C03451		CHEBI:15694
m00169[c]	(S)-2-aminobutanoate	C4H9NO2	C4H9NO2	0	c	C02356		CHEBI:35619
m00170[m]	(S)-3-hydroxy-11-cis-octadecenoyl-CoA	C39H68N7O18P3S	C39H68N7O18P3S	0	m
m00170[p]	(S)-3-hydroxy-11-cis-octadecenoyl-CoA	C39H68N7O18P3S	C39H68N7O18P3S	0	p
m00171[m]	(S)-3-hydroxy-2-methylbutyryl-CoA	C26H44N7O18P3S	C26H44N7O18P3S	0	m	C04405		CHEBI:15449
m00172[m]	(S)-3-hydroxy-7-hexadecenoyl-CoA	C37H64N7O18P3S	C37H64N7O18P3S	0	m
m00172[p]	(S)-3-hydroxy-7-hexadecenoyl-CoA	C37H64N7O18P3S	C37H64N7O18P3S	0	p
m00173[m]	(S)-3-hydroxybutyryl-CoA	C25H42N7O18P3S	C25H42N7O18P3S	0	m	C01144		CHEBI:15453
m00173[p]	(S)-3-hydroxybutyryl-CoA	C25H42N7O18P3S	C25H42N7O18P3S	0	p	C01144		CHEBI:15453
m00174[m]	(S)-3-hydroxydodecanoyl-CoA	C33H58N7O18P3S	C33H58N7O18P3S	0	m	C05262		CHEBI:27668
m00174[p]	(S)-3-hydroxydodecanoyl-CoA	C33H58N7O18P3S	C33H58N7O18P3S	0	p	C05262		CHEBI:27668
m00175[m]	(S)-3-hydroxyhexadecanoyl-CoA	C37H66N7O18P3S	C37H66N7O18P3S	0	m	C05258		CHEBI:27402
m00175[p]	(S)-3-hydroxyhexadecanoyl-CoA	C37H66N7O18P3S	C37H66N7O18P3S	0	p	C05258		CHEBI:27402
m00176[m]	(S)-3-hydroxyoleyleoyl-CoA	C39H68N7O18P3S	C39H68N7O18P3S	0	m
m00176[p]	(S)-3-hydroxyoleyleoyl-CoA	C39H68N7O18P3S	C39H68N7O18P3S	0	p
m00177[m]	(S)-3-hydroxypalmitoleoyl-CoA	C37H64N7O18P3S	C37H64N7O18P3S	0	m
m00177[p]	(S)-3-hydroxypalmitoleoyl-CoA	C37H64N7O18P3S	C37H64N7O18P3S	0	p
m00178[m]	(S)-3-hydroxytetradecanoyl-CoA	C35H62N7O18P3S	C35H62N7O18P3S	0	m	C05260		CHEBI:27466
m00178[p]	(S)-3-hydroxytetradecanoyl-CoA	C35H62N7O18P3S	C35H62N7O18P3S	0	p	C05260		CHEBI:27466
m00179[c]	(S)-3-sulfolactate	C3H6O6S	C3H6O6S	0	c	C11499		CHEBI:16712
m00179[m]	(S)-3-sulfolactate	C3H6O6S	C3H6O6S	0	m	C11499		CHEBI:16712
m00179[s]	(S)-3-sulfolactate	C3H6O6S	C3H6O6S	0	s	C11499		CHEBI:16712
m00180[c]	(S)-dihydroorotate	C5H6N2O4	C5H6N2O4	0	c	C00337		CHEBI:17025
m00181[m]	(S)-hydroxydecanoyl-CoA	C31H54N7O18P3S	C31H54N7O18P3S	0	m	C05264		CHEBI:28325
m00181[p]	(S)-hydroxydecanoyl-CoA	C31H54N7O18P3S	C31H54N7O18P3S	0	p	C05264		CHEBI:28325
m00182[m]	(S)-hydroxyhexanoyl-CoA	C27H46N7O18P3S	C27H46N7O18P3S	0	m	C05268		CHEBI:28276
m00182[p]	(S)-hydroxyhexanoyl-CoA	C27H46N7O18P3S	C27H46N7O18P3S	0	p	C05268		CHEBI:28276
m00183[m]	(S)-hydroxyoctanoyl-CoA	C29H50N7O18P3S	C29H50N7O18P3S	0	m	C05266		CHEBI:28632
m00183[p]	(S)-hydroxyoctanoyl-CoA	C29H50N7O18P3S	C29H50N7O18P3S	0	p	C05266		CHEBI:28632
m00184[c]	[ACP]	HSR	HSR	0	c	C00229
m00185[c]	[apocarboxlase]	XH	XH	0	c
m00186[c]	[apotransferin]			0	c	C05780
m00186[l]	[apotransferin]			0	l	C05780
m00186[s]	[apotransferin]			0	s	C05780
m00187[c]	[beta-adrenergic-receptor]	C4H6N2O3R2	C4H6N2O3R2	0	c	C01141
m00188[c]	[methionine synthase]-cob(II)alamin	C62H89CoN13O14P.C7H8N4O2R2	C62H89CoN13O14P.C7H8N4O2R2	0	c	C06409
m00189[c]	[methionine synthase]-methylcob(I)alamin	C63H92CoN13O14P.C7H8N4O2R2	C63H92CoN13O14P.C7H8N4O2R2	0	c	C06410
m00190[c]	[myosin light chain]	C4H6N2O3R2	C4H6N2O3R2	0	c	C01003
m00191[c]	[myosin light chain]-phosphate	C4H7N2O6PR2	C4H7N2O6PR2	0	c	C03875
m00192[c]	[phosphorylase A]			0	c	C02307
m00193[c]	[phosphorylase B]			0	c	C02308
m00194[c]	[protein C terminal]-S-farnesyl-L-cysteine	C20H33N2O3SR(C2H2NOR)n	C20H33N2O3SR(C2H2NOR)n	0	c	C04506
m00195[c]	[protein C terminal]-S-farnesyl-L-cysteine-methyl ester	C21H35N2O3SR(C2H2NOR)n	C21H35N2O3SR(C2H2NOR)n	0	c	C04748
m00196[c]	[protein]	C2H4NO2R(C2H2NOR)n	C2H4NO2R(C2H2NOR)n	0	c	C00017		CHEBI:16541
m00197[c]	[protein]-L-arginine	C6H12N4O	C6H12N4O	0	c	C00613
m00198[c]	[protein]-L-asparagine	C4H6N2O2	C4H6N2O2	0	c	C03021
m00198[l]	[protein]-L-asparagine	C4H6N2O2	C4H6N2O2	0	l	C03021
m00198[r]	[protein]-L-asparagine	C4H6N2O2	C4H6N2O2	0	r	C03021
m00199[c]	[protein]-L-citrulline	C6H11N3O2	C6H11N3O2	0	c	C03022
m00200[c]	[protein]-L-cysteine	C3H5NOS	C3H5NOS	0	c	C02743
m00201[c]	[protein]-L-glutamine	C5H8N2O2	C5H8N2O2	0	c	C02583
m00202[c]	[protein]-L-isoaspartate	C5H6N2O4R2	C5H6N2O4R2	0	c	C03306
m00203[c]	[protein]-L-isoaspartate-methyl ester	C6H8N2O4R2	C6H8N2O4R2	0	c	C04311
m00204[c]	[protein]-L-lysine	C6H12N2O	C6H12N2O	0	c	C02188
m00204[n]	[protein]-L-lysine	C6H12N2O	C6H12N2O	0	n	C02188
m00204[s]	[protein]-L-lysine	C6H12N2O	C6H12N2O	0	s	C02188
m00205[c]	[protein]-L-serine	C3H5NO2	C3H5NO2	0	c	C02189
m00205[g]	[protein]-L-serine	C3H5NO2	C3H5NO2	0	g	C02189
m00205[l]	[protein]-L-serine	C3H5NO2	C3H5NO2	0	l	C02189
m00205[r]	[protein]-L-serine	C3H5NO2	C3H5NO2	0	r	C02189
m00206[c]	[protein]-L-tyrosine	C9H9NO2	C9H9NO2	0	c	C00585
m00207[c]	[protein]-N5-alkylglutamine	C6H8N3O3R3	C6H8N3O3R3	0	c	C03636
m00208[c]	[protein]-N6-(dihydrolipoyl)lysine	C8H16NOS2R	C8H16NOS2R	0	c	C16832
m00209[c]	[protein]-N6-(lipoyl)lysine	C8H14NOS2R	C8H14NOS2R	0	c	C16237
m00210[c]	[protein]-N6-(octanoyl)lysine	C8H16NOR	C8H16NOR	0	c	C16236
m00211[c]	[protein]-N6,N6,N6-trimethyl-L-lysine	C10H20N3O2R2	C10H20N3O2R2	0	c	C05546
m00211[n]	[protein]-N6,N6,N6-trimethyl-L-lysine	C10H20N3O2R2	C10H20N3O2R2	0	n	C05546
m00211[r]	[protein]-N6,N6,N6-trimethyl-L-lysine	C10H20N3O2R2	C10H20N3O2R2	0	r	C05546
m00212[c]	[protein]-N6,N6-dimethyl-L-lysine	C9H17N3O2R2	C9H17N3O2R2	0	c	C05545
m00212[n]	[protein]-N6,N6-dimethyl-L-lysine	C9H17N3O2R2	C9H17N3O2R2	0	n	C05545
m00213[c]	[protein]-N6-methyl-L-lysine	C8H15N3O2R2	C8H15N3O2R2	0	c	C05544
m00214[c]	[protein]-N-ubiquityllysine			0	c	C03635
m00215[c]	[protein]-omega-N-(ADP-D-ribosyl)-L-arginine	C22H34N10O15P2R2	C22H34N10O15P2R2	0	c	C16011
m00216[c]	[protein]-S-methyl-L-cysteine	C5H8N2O2SR2	C5H8N2O2SR2	0	c	C03800
m00217[c]	[protein]-tyrosine-O-sulfate	C10H10N2O6SR2	C10H10N2O6SR2	0	c	C03721
m00218[c]	[protein]-tyrosine-phosphate	C10H11N2O6PR2	C10H11N2O6PR2	0	c	C01167
m00219[c]	[pyruvate dehydrogenase (acetyl transferring)]	C4H6N2O3R2	C4H6N2O3R2	0	c	C01256
m00220[c]	[pyruvate dehydrogenase (acetyl transferring)]-phosphate	C4H7N2O6PR2	C4H7N2O6PR2	0	c	C01293
m00221[c]	1-(1,2,3,4,5-pentahydroxypent-1-yl)-1,2,3,4-tetrahydro-beta-carboline-3-carboxylate	C17H22N2O7	C17H22N2O7	0	c
m00222[c]	1-(1-alkenyl)-sn-glycero-3-phosphate	C5H10O6PR	C5H10O6PR	0	c	C15646
m00223[c]	1-(1-alkenyl)-sn-glycero-3-phosphoethanolamine	C7H15NO6PR	C7H15NO6PR	0	c	C04635		CHEBI:15785
m00224[c]	1-(1-alkenyl)-sn-glycerol	C5H9O3R	C5H9O3R	0	c	C15645
m00225[c]	1-(3-pyridinyl)-1,4-butanediol	C9H13NO2	C9H13NO2	0	c	C19582
m00226[c]	1-(methylnitrosoamino)-4-(3-pyridinyl)-1,4-butanediol	C10H15N3O3	C10H15N3O3	0	c	C19577
m00227[c]	1,1-dichloroethylene epoxide	C2H2Cl2O	C2H2Cl2O	0	c	C14857
m00228[c]	1,1-dichloroethylene	C2H2Cl2	C2H2Cl2	0	c	C14039		CHEBI:34031
m00228[s]	1,1-dichloroethylene	C2H2Cl2	C2H2Cl2	0	s	C14039		CHEBI:34031
m00229[c]	1,2,3,4-tetrahydro-alpha,7-dihydroxy-beta-(hydroxymethyl)-9-methoxy-3,4-dioxocyclopenta[c][1]benzopyran-6-propanal	C17H16O8	C17H16O8	0	c	C19591
m00230[c]	1,2,3,4-tetrahydro-beta-carboline	C11H12N2	C11H12N2	0	c
m00231[c]	1,2-dehydrosalsolinol	C10H11NO2	C10H11NO2	0	c
m00232[c]	1,2-D-glucosyl-5-D-(galactosyloxy)-L-lysine-procollagen	C19H33N3O13R2	C19H33N3O13R2	0	c	C04759
m00233[c]	1,2-diacylglycerol-bile-PC pool	C5H6O5R2	C5H6O5R2	0	c	C00641		CHEBI:17815
m00234[s]	1,2-diacylglycerol-chylomicron pool	C5H6O5R2	C5H6O5R2	0	s	C00641		CHEBI:17815
m00235[c]	1,2-diacylglycerol-LD-PC pool	C5H6O5R2	C5H6O5R2	0	c	C00641		CHEBI:17815
m00236[c]	1,2-diacylglycerol-LD-PE pool	C5H6O5R2	C5H6O5R2	0	c	C00641		CHEBI:17815
m00236[r]	1,2-diacylglycerol-LD-PE pool	C5H6O5R2	C5H6O5R2	0	r	C00641		CHEBI:17815
m00237[c]	1,2-diacylglycerol-LD-PI pool	C5H6O5R2	C5H6O5R2	0	c	C00641		CHEBI:17815
m00238[c]	1,2-diacylglycerol-LD-PS pool	C5H6O5R2	C5H6O5R2	0	c	C00641		CHEBI:17815
m00239[c]	1,2-diacylglycerol-LD-SM pool	C5H6O5R2	C5H6O5R2	0	c	C00641		CHEBI:17815
m00240[c]	1,2-diacylglycerol-LD-TAG pool	C5H6O5R2	C5H6O5R2	0	c	C00641		CHEBI:17815
m00240[g]	1,2-diacylglycerol-LD-TAG pool	C5H6O5R2	C5H6O5R2	0	g	C00641		CHEBI:17815
m00240[n]	1,2-diacylglycerol-LD-TAG pool	C5H6O5R2	C5H6O5R2	0	n	C00641		CHEBI:17815
m00241[s]	1,2-diacylglycerol-VLDL pool	C5H6O5R2	C5H6O5R2	0	s	C00641		CHEBI:17815
m00242[c]	1,2-dibromoethane	C2H4Br2	C2H4Br2	0	c	C11088
m00242[s]	1,2-dibromoethane	C2H4Br2	C2H4Br2	0	s	C11088
m00243[c]	1,2-dihydronaphthalene-1,2-diol	C10H10O2	C10H10O2	0	c	C06205		CHEBI:28516
m00244[c]	1,2-dihydroxy-3,4-epoxy-1,2,3,4-tetrahydronaphthalene	C10H10O3	C10H10O3	0	c	C14784		CHEBI:34048
m00245[c]	1,2-dihydroxy-5-(methylthio)pent-1-en-3-one	C6H10O3S	C6H10O3S	0	c	C15606		CHEBI:49252
m00246[c]	1,2-naphthoquinone	C10H6O2	C10H6O2	0	c	C14783
m00247[c]	1,3-bisphospho-D-glycerate	C3H8O10P2	C3H8O10P2	0	c	C00236		CHEBI:16001
m00248[c]	1,3-diaminopropane	C3H10N2	C3H10N2	0	c	C00986		CHEBI:15725
m00249[c]	1,4-benzothiazine-O-quinonimine	C12H12N2O5S	C12H12N2O5S	0	c
m00250[c]	1,4-dihydroxynaphthalene	C10H8O2	C10H8O2	0	c	C14785		CHEBI:34063
m00251[c]	1,4-naphthoquinone	C10H6O2	C10H6O2	0	c	C02617		CHEBI:27418
m00252[c]	10,11-dihydro-12-epi-LTB4	C20H34O4	C20H34O4	0	c
m00252[m]	10,11-dihydro-12-epi-LTB4	C20H34O4	C20H34O4	0	m
m00252[p]	10,11-dihydro-12-epi-LTB4	C20H34O4	C20H34O4	0	p
m00253[c]	10,11-dihydro-12-oxo-LTB4	C20H32O4	C20H32O4	0	c
m00253[m]	10,11-dihydro-12-oxo-LTB4	C20H32O4	C20H32O4	0	m
m00253[p]	10,11-dihydro-12-oxo-LTB4	C20H32O4	C20H32O4	0	p
m00254[c]	10,11-dihydro-12R-hydroxy-LTC4	C30H49N3O10S	C30H49N3O10S	0	c
m00254[m]	10,11-dihydro-12R-hydroxy-LTC4	C30H49N3O10S	C30H49N3O10S	0	m
m00254[p]	10,11-dihydro-12R-hydroxy-LTC4	C30H49N3O10S	C30H49N3O10S	0	p
m00255[c]	10,11-dihydro-20-dihydroxy-LTB4	C20H34O6	C20H34O6	0	c
m00255[r]	10,11-dihydro-20-dihydroxy-LTB4	C20H34O6	C20H34O6	0	r
m00256[c]	10,11-dihydro-20-trihydroxy-LTB4	C20H34O7	C20H34O7	0	c
m00256[r]	10,11-dihydro-20-trihydroxy-LTB4	C20H34O7	C20H34O7	0	r
m00257[c]	10,11-dihydro-LTB4	C20H34O4	C20H34O4	0	c
m00257[m]	10,11-dihydro-LTB4	C20H34O4	C20H34O4	0	m
m00257[p]	10,11-dihydro-LTB4	C20H34O4	C20H34O4	0	p
m00257[r]	10,11-dihydro-LTB4	C20H34O4	C20H34O4	0	r
m00258[c]	10,11-dihydro-LTB4-CoA	C41H68N7O19P3S	C41H68N7O19P3S	0	c
m00258[m]	10,11-dihydro-LTB4-CoA	C41H68N7O19P3S	C41H68N7O19P3S	0	m
m00258[p]	10,11-dihydro-LTB4-CoA	C41H68N7O19P3S	C41H68N7O19P3S	0	p
m00258[r]	10,11-dihydro-LTB4-CoA	C41H68N7O19P3S	C41H68N7O19P3S	0	r
m00259[c]	10,11-epoxy-(4Z,7Z)-hexadecadienoic acid	C16H26O3	C16H26O3	0	c
m00260[c]	10,13,16,19-docosatetraenoic acid	C22H36O2	C22H36O2	0	c
m00260[l]	10,13,16,19-docosatetraenoic acid	C22H36O2	C22H36O2	0	l
m00260[r]	10,13,16,19-docosatetraenoic acid	C22H36O2	C22H36O2	0	r
m00260[s]	10,13,16,19-docosatetraenoic acid	C22H36O2	C22H36O2	0	s
m00261[c]	10,13,16,19-docosatetraenoylcarnitine	C29H49NO4	C29H49NO4	0	c
m00261[m]	10,13,16,19-docosatetraenoylcarnitine	C29H49NO4	C29H49NO4	0	m
m00261[r]	10,13,16,19-docosatetraenoylcarnitine	C29H49NO4	C29H49NO4	0	r
m00262[c]	10,13,16,19-docosatetraenoyl-CoA	C43H70N7O17P3S	C43H70N7O17P3S	0	c
m00262[m]	10,13,16,19-docosatetraenoyl-CoA	C43H70N7O17P3S	C43H70N7O17P3S	0	m
m00262[r]	10,13,16,19-docosatetraenoyl-CoA	C43H70N7O17P3S	C43H70N7O17P3S	0	r
m00263[c]	10,13,16-docosatrienoylcarnitine	C29H51NO4	C29H51NO4	0	c
m00263[m]	10,13,16-docosatrienoylcarnitine	C29H51NO4	C29H51NO4	0	m
m00263[r]	10,13,16-docosatrienoylcarnitine	C29H51NO4	C29H51NO4	0	r
m00264[c]	10,13,16-docosatrienoyl-CoA	C43H72N7O17P3S	C43H72N7O17P3S	0	c
m00264[m]	10,13,16-docosatrienoyl-CoA	C43H72N7O17P3S	C43H72N7O17P3S	0	m
m00264[r]	10,13,16-docosatrienoyl-CoA	C43H72N7O17P3S	C43H72N7O17P3S	0	r
m00265[c]	10,13,16-docosatriynoic acid	C22H38O2	C22H38O2	0	c
m00265[l]	10,13,16-docosatriynoic acid	C22H38O2	C22H38O2	0	l
m00265[r]	10,13,16-docosatriynoic acid	C22H38O2	C22H38O2	0	r
m00265[s]	10,13,16-docosatriynoic acid	C22H38O2	C22H38O2	0	s
m00266[c]	10-formyl-THF	C20H23N7O7	C20H23N7O7	0	c	C00234		CHEBI:15637
m00266[l]	10-formyl-THF	C20H23N7O7	C20H23N7O7	0	l	C00234		CHEBI:15637
m00266[m]	10-formyl-THF	C20H23N7O7	C20H23N7O7	0	m	C00234		CHEBI:15637
m00266[s]	10-formyl-THF	C20H23N7O7	C20H23N7O7	0	s	C00234		CHEBI:15637
m00267[c]	10-formyl-THF-glu(5)	C40H51N11O19	C40H51N11O19	0	c	C05928
m00267[l]	10-formyl-THF-glu(5)	C40H51N11O19	C40H51N11O19	0	l	C05928
m00267[m]	10-formyl-THF-glu(5)	C40H51N11O19	C40H51N11O19	0	m	C05928
m00267[s]	10-formyl-THF-glu(5)	C40H51N11O19	C40H51N11O19	0	s	C05928
m00268[c]	10-formyl-THF-glu(6)	C45H58N12O22	C45H58N12O22	0	c
m00268[l]	10-formyl-THF-glu(6)	C45H58N12O22	C45H58N12O22	0	l
m00268[m]	10-formyl-THF-glu(6)	C45H58N12O22	C45H58N12O22	0	m
m00268[s]	10-formyl-THF-glu(6)	C45H58N12O22	C45H58N12O22	0	s
m00269[c]	10-formyl-THF-glu(7)	C50H65N13O25	C50H65N13O25	0	c
m00269[l]	10-formyl-THF-glu(7)	C50H65N13O25	C50H65N13O25	0	l
m00269[m]	10-formyl-THF-glu(7)	C50H65N13O25	C50H65N13O25	0	m
m00269[s]	10-formyl-THF-glu(7)	C50H65N13O25	C50H65N13O25	0	s
m00270[c]	10-HETE	C20H32O3	C20H32O3	0	c
m00270[r]	10-HETE	C20H32O3	C20H32O3	0	r
m00271[c]	10-hydroperoxy-H4-neuroprostane	C22H32O6	C22H32O6	0	c
m00272[c]	10-hydroxy-D4-neuroprostane	C22H32O5	C22H32O5	0	c
m00273[c]	10-hydroxy-E4-neuroprostane	C22H32O5	C22H32O5	0	c
m00274[c]	10-hydroxy-octadec-(12Z)-enoate-9-beta-D-glucuronide	C24H42O10	C24H42O10	0	c
m00274[r]	10-hydroxy-octadec-(12Z)-enoate-9-beta-D-glucuronide	C24H42O10	C24H42O10	0	r
m00275[c]	10-peroxy-docosahexaenoate	C22H31O4	C22H31O4	0	c
m00276[c]	11,12,15-THETA	C20H34O5	C20H34O5	0	c	C14782
m00277[c]	11,12-DHET	C20H34O4	C20H34O4	0	c	C14774
m00278[c]	11,12-dihydroxy-(5E,7E,9E,14Z)-eicosatetraenoate	C20H32O4	C20H32O4	0	c
m00279[c]	11,12-EET	C20H32O3	C20H32O3	0	c	C14770
m00280[c]	11,14,15-THETA	C20H34O5	C20H34O5	0	c	C14814
m00281[c]	11,15-cyclo-12,14-cycloperoxy-8-hydroperoxy-(5Z,9E)-eicosadienoate	C20H32O6	C20H32O6	0	c
m00282[c]	11,15-cyclo-8,12,14-trihydroxy-(5Z,9E)-eicosadienoic acid	C20H34O5	C20H34O5	0	c
m00283[c]	11beta,17alpha,21-trihydroxypregnenolone	C21H32O5	C21H32O5	0	c	C05489		CHEBI:27783
m00284[c]	11beta-hydroxyandrost-4-ene-3,17-dione	C19H26O3	C19H26O3	0	c	C05284		CHEBI:27967
m00284[m]	11beta-hydroxyandrost-4-ene-3,17-dione	C19H26O3	C19H26O3	0	m	C05284		CHEBI:27967
m00284[r]	11beta-hydroxyandrost-4-ene-3,17-dione	C19H26O3	C19H26O3	0	r	C05284		CHEBI:27967
m00285[c]	11beta-hydroxyprogesterone	C21H30O3	C21H30O3	0	c	C05498		CHEBI:28247
m00286[m]	11-carboxy-alpha-chromanol	C26H42O4	C26H42O4	0	m
m00287[m]	11-carboxy-alpha-tocotrienol	C26H38O4	C26H38O4	0	m
m00288[m]	11-carboxy-gamma-chromanol	C25H40O4	C25H40O4	0	m
m00289[m]	11-carboxy-gamma-tocotrienol	C25H36O4	C25H36O4	0	m
m00290[c]	11-cis-retinal	C20H28O	C20H28O	0	c	C02110		CHEBI:16066
m00291[c]	11-cis-retinol	C20H30O	C20H30O	0	c	C00899
m00292[c]	11-cis-retinyl-palmitate	C36H60O2	C36H60O2	0	c	C03455
m00293[c]	11-dehydro-thromboxane B2	C20H32O6	C20H32O6	0	c	C05964
m00294[c]	11-deoxycorticosterone	C21H30O3	C21H30O3	0	c	C03205		CHEBI:16973
m00294[m]	11-deoxycorticosterone	C21H30O3	C21H30O3	0	m	C03205		CHEBI:16973
m00294[r]	11-deoxycorticosterone	C21H30O3	C21H30O3	0	r	C03205		CHEBI:16973
m00295[c]	11-deoxycortisol	C21H30O4	C21H30O4	0	c	C05488		CHEBI:28324
m00295[m]	11-deoxycortisol	C21H30O4	C21H30O4	0	m	C05488		CHEBI:28324
m00295[r]	11-deoxycortisol	C21H30O4	C21H30O4	0	r	C05488		CHEBI:28324
m00296[c]	11h-14,15-EETA	C20H32O4	C20H32O4	0	c	C14813
m00297[c]	11-HETE	C20H32O3	C20H32O3	0	c
m00298[c]	11-HpODE	C18H32O4	C18H32O4	0	c	C07338
m00299[c]	11-hydroperoxy-H4-neuroprostane	C22H32O6	C22H32O6	0	c
m00300[c]	11-hydroxy-D4-neuroprostane	C22H32O5	C22H32O5	0	c
m00301[c]	11-hydroxy-E4-neuroprostane	C22H32O5	C22H32O5	0	c
m00302[c]	11-peroxy-(5Z,8Z,12E,14Z)-eicosatetraenoate	C20H31O4	C20H31O4	0	c
m00303[c]	11-peroxy-docosahexaenoate	C22H31O4	C22H31O4	0	c
m00304[c]	11-trans-LTE4	C23H37NO5S	C23H37NO5S	0	c
m00305[c]	12(13)-EpOME	C18H32O3	C18H32O3	0	c	C14826
m00305[r]	12(13)-EpOME	C18H32O3	C18H32O3	0	r	C14826
m00306[c]	12(R)-HPETE	C20H32O4	C20H32O4	0	c	C14812
m00307[c]	12(S)-HETE	C20H32O3	C20H32O3	0	c
m00307[r]	12(S)-HETE	C20H32O3	C20H32O3	0	r
m00308[c]	12(S)-HHT	C17H28O3	C17H28O3	0	c
m00309[c]	12(S)-HPETE	C20H32O4	C20H32O4	0	c	C05965		CHEBI:15626
m00309[p]	12(S)-HPETE	C20H32O4	C20H32O4	0	p	C05965		CHEBI:15626
m00309[r]	12(S)-HPETE	C20H32O4	C20H32O4	0	r	C05965		CHEBI:15626
m00309[s]	12(S)-HPETE	C20H32O4	C20H32O4	0	s	C05965		CHEBI:15626
m00310[c]	12,13-epoxy-(6Z,9Z)-octadecadienoic acid	C18H30O3	C18H30O3	0	c
m00311[c]	12,13-epoxy-9-alkoxy-(10E)-octadecenoate	C18H31O4	C18H31O4	0	c
m00312[c]	12,13-epoxy-9-hydroperoxy-(10E)-octadecenoate	C18H32O5	C18H32O5	0	c
m00313[c]	12,13-epoxylinoleic acid-radical	C18H31O3	C18H31O3	0	c
m00314[c]	12,13-hydroxyoctadec-9(z)-enoate	C18H34O4	C18H34O4	0	c
m00314[r]	12,13-hydroxyoctadec-9(z)-enoate	C18H34O4	C18H34O4	0	r
m00315[c]	12,15,18,21-tetracosatetraenoic acid	C24H40O2	C24H40O2	0	c
m00315[l]	12,15,18,21-tetracosatetraenoic acid	C24H40O2	C24H40O2	0	l
m00315[r]	12,15,18,21-tetracosatetraenoic acid	C24H40O2	C24H40O2	0	r
m00315[s]	12,15,18,21-tetracosatetraenoic acid	C24H40O2	C24H40O2	0	s
m00316[c]	12,15,18,21-tetracosatetraenoylcarnitine	C31H53NO4	C31H53NO4	0	c
m00316[r]	12,15,18,21-tetracosatetraenoylcarnitine	C31H53NO4	C31H53NO4	0	r
m00317[c]	12,15,18,21-tetracosatetraenoyl-CoA	C45H74N7O17P3S	C45H74N7O17P3S	0	c
m00317[p]	12,15,18,21-tetracosatetraenoyl-CoA	C45H74N7O17P3S	C45H74N7O17P3S	0	p
m00317[r]	12,15,18,21-tetracosatetraenoyl-CoA	C45H74N7O17P3S	C45H74N7O17P3S	0	r
m00318[c]	12,20-diHETE	C20H32O4	C20H32O4	0	c
m00318[r]	12,20-diHETE	C20H32O4	C20H32O4	0	r
m00319[c]	12,20-dioxo-LTB4	C20H28O5	C20H28O5	0	c
m00320[c]	12-epi-LTB4	C20H32O4	C20H32O4	0	c
m00321[c]	12-hetre	C20H34O3	C20H34O3	0	c
m00322[c]	12-hydroperoxyeicosatetraenoate-glyceryl-ester	C23H38O6	C23H38O6	0	c
m00323[c]	12-hydroxy-13-O-D-glucuronoside-octadec-(9Z)-enoate	C24H42O10	C24H42O10	0	c
m00323[r]	12-hydroxy-13-O-D-glucuronoside-octadec-(9Z)-enoate	C24H42O10	C24H42O10	0	r
m00324[r]	12-hydroxy-arachidonate	C20H32O3	C20H32O3	0	r
m00325[c]	12-hydroxydodecanoic acid	C12H24O3	C12H24O3	0	c	C08317		CHEBI:39567
m00325[s]	12-hydroxydodecanoic acid	C12H24O3	C12H24O3	0	s	C08317		CHEBI:39567
m00326[c]	12-keto-LTB4	C20H30O4	C20H30O4	0	c	C05949
m00326[m]	12-keto-LTB4	C20H30O4	C20H30O4	0	m	C05949
m00326[p]	12-keto-LTB4	C20H30O4	C20H30O4	0	p	C05949
m00326[r]	12-keto-LTB4	C20H30O4	C20H30O4	0	r	C05949
m00327[c]	12-O-D-glucuronoside-13-hydroxyoctadec-(9Z)-enoate	C24H42O10	C24H42O10	0	c
m00327[r]	12-O-D-glucuronoside-13-hydroxyoctadec-(9Z)-enoate	C24H42O10	C24H42O10	0	r
m00328[c]	12-oxo-10,11-dihydro-20-COOH-LTB4	C20H30O6	C20H30O6	0	c
m00328[r]	12-oxo-10,11-dihydro-20-COOH-LTB4	C20H30O6	C20H30O6	0	r
m00329[c]	12-oxo-20-carboxy-LTB4	C20H28O6	C20H28O6	0	c
m00329[r]	12-oxo-20-carboxy-LTB4	C20H28O6	C20H28O6	0	r
m00330[c]	12-oxo-20-dihydroxy-LTB4	C20H30O6	C20H30O6	0	c
m00330[r]	12-oxo-20-dihydroxy-LTB4	C20H30O6	C20H30O6	0	r
m00331[c]	12-oxo-20-hydroxy-LTB4	C20H30O5	C20H30O5	0	c
m00331[r]	12-oxo-20-hydroxy-LTB4	C20H30O5	C20H30O5	0	r
m00332[c]	12-oxo-20-trihydroxy-LTB4	C20H30O7	C20H30O7	0	c
m00332[r]	12-oxo-20-trihydroxy-LTB4	C20H30O7	C20H30O7	0	r
m00333[c]	12-oxo-c-LTB3	C30H47N3O10S	C30H47N3O10S	0	c
m00333[m]	12-oxo-c-LTB3	C30H47N3O10S	C30H47N3O10S	0	m
m00333[p]	12-oxo-c-LTB3	C30H47N3O10S	C30H47N3O10S	0	p
m00333[r]	12-oxo-c-LTB3	C30H47N3O10S	C30H47N3O10S	0	r
m00334[c]	12-oxoETE	C20H30O3	C20H30O3	0	c
m00335[c]	12-peroxy-(5Z,8Z,10E,14Z)-eicosatetraenoate	C20H31O4	C20H31O4	0	c
m00336[c]	13(S)-HODE	C18H32O3	C18H32O3	0	c	C14762		CHEBI:34154
m00337[c]	13(S)-HPODE	C18H32O4	C18H32O4	0	c	C04717		CHEBI:15655
m00338[c]	13,14-dihydro-15-keto-PGD2	C20H32O5	C20H32O5	0	c
m00339[c]	13,14-dihydro-15-oxo-lipoxin A4	C20H32O5	C20H32O5	0	c
m00340[c]	13,14-dihydro-lipoxin A4	C20H34O5	C20H34O5	0	c
m00341[c]	13,16,19-docosatrienoic acid	C22H38O2	C22H38O2	0	c	C16534
m00341[l]	13,16,19-docosatrienoic acid	C22H38O2	C22H38O2	0	l	C16534
m00341[r]	13,16,19-docosatrienoic acid	C22H38O2	C22H38O2	0	r	C16534
m00341[s]	13,16,19-docosatrienoic acid	C22H38O2	C22H38O2	0	s	C16534
m00342[c]	13,16,19-docosatrienoylcarnitine	C29H51NO4	C29H51NO4	0	c
m00342[m]	13,16,19-docosatrienoylcarnitine	C29H51NO4	C29H51NO4	0	m
m00342[r]	13,16,19-docosatrienoylcarnitine	C29H51NO4	C29H51NO4	0	r
m00343[c]	13,16,19-docosatrienoyl-CoA	C43H72N7O17P3S	C43H72N7O17P3S	0	c
m00343[m]	13,16,19-docosatrienoyl-CoA	C43H72N7O17P3S	C43H72N7O17P3S	0	m
m00343[r]	13,16,19-docosatrienoyl-CoA	C43H72N7O17P3S	C43H72N7O17P3S	0	r
m00344[c]	13-carboxy-alpha-tocopherol	C29H48O4	C29H48O4	0	c
m00344[m]	13-carboxy-alpha-tocopherol	C29H48O4	C29H48O4	0	m
m00344[r]	13-carboxy-alpha-tocopherol	C29H48O4	C29H48O4	0	r
m00345[c]	13-carboxy-alpha-tocotrienol	C29H42O4	C29H42O4	0	c
m00345[m]	13-carboxy-alpha-tocotrienol	C29H42O4	C29H42O4	0	m
m00345[r]	13-carboxy-alpha-tocotrienol	C29H42O4	C29H42O4	0	r
m00346[c]	13-carboxy-gamma-tocopherol	C28H46O4	C28H46O4	0	c
m00346[m]	13-carboxy-gamma-tocopherol	C28H46O4	C28H46O4	0	m
m00346[r]	13-carboxy-gamma-tocopherol	C28H46O4	C28H46O4	0	r
m00347[c]	13-carboxy-gamma-tocotrienol	C28H40O4	C28H40O4	0	c
m00347[m]	13-carboxy-gamma-tocotrienol	C28H40O4	C28H40O4	0	m
m00347[r]	13-carboxy-gamma-tocotrienol	C28H40O4	C28H40O4	0	r
m00348[c]	13-cis-oxo-retinoate	C20H28O3	C20H28O3	0	c
m00349[c]	13-cis-retinal	C20H28O	C20H28O	0	c			CHEBI:45487
m00349[r]	13-cis-retinal	C20H28O	C20H28O	0	r			CHEBI:45487
m00350[c]	13-cis-retinoate	C20H28O2	C20H28O2	0	c	D00348
m00350[r]	13-cis-retinoate	C20H28O2	C20H28O2	0	r	D00348
m00351[c]	13-cis-retinol	C20H30O	C20H30O	0	c	C19962
m00352[r]	13-cis-retinoyl-beta-D-glucuronide	C26H36O8	C26H36O8	0	r
m00353[c]	13-cis-retinoyl-glucuronide	C26H36O8	C26H36O8	0	c
m00353[r]	13-cis-retinoyl-glucuronide	C26H36O8	C26H36O8	0	r
m00353[s]	13-cis-retinoyl-glucuronide	C26H36O8	C26H36O8	0	s
m00354[c]	13-HETE	C20H32O3	C20H32O3	0	c
m00355[c]	13-hydroperoxy-H4-neuroprostane	C22H32O6	C22H32O6	0	c
m00356[c]	13-hydroxy-alpha-tocopherol	C29H50O3	C29H50O3	0	c
m00356[r]	13-hydroxy-alpha-tocopherol	C29H50O3	C29H50O3	0	r
m00357[c]	13-hydroxy-alpha-tocotrienol	C29H44O3	C29H44O3	0	c
m00357[r]	13-hydroxy-alpha-tocotrienol	C29H44O3	C29H44O3	0	r
m00358[c]	13-hydroxy-D4-neuroprostane	C22H32O5	C22H32O5	0	c
m00359[c]	13-hydroxy-E4-neuroprostane	C22H32O5	C22H32O5	0	c
m00360[c]	13-hydroxy-gamma-tocopherol	C28H48O3	C28H48O3	0	c
m00360[r]	13-hydroxy-gamma-tocopherol	C28H48O3	C28H48O3	0	r
m00361[c]	13-hydroxy-gamma-tocotrienol	C28H42O3	C28H42O3	0	c
m00361[r]	13-hydroxy-gamma-tocotrienol	C28H42O3	C28H42O3	0	r
m00362[c]	13-oxo-(9Z,11E)-tridecadienoate	C13H20O3	C13H20O3	0	c
m00363[c]	13-oxy-radical-octadecadienoate	C18H31O3	C18H31O3	0	c
m00364[c]	14,15-DHET	C20H34O4	C20H34O4	0	c	C14775
m00365[c]	14,15-DiHETE	C20H32O4	C20H32O4	0	c	C14813
m00365[n]	14,15-DiHETE	C20H32O4	C20H32O4	0	n	C14813
m00366[c]	14,15-EET	C20H32O3	C20H32O3	0	c	C14771
m00366[r]	14,15-EET	C20H32O3	C20H32O3	0	r	C14771
m00367[c]	14-demethyllanosterol	C29H48O	C29H48O	0	c	C05108		CHEBI:18364
m00368[c]	14-hydroperoxy-H4-neuroprostane	C22H32O6	C22H32O6	0	c
m00369[c]	14-hydroxy-D4-neuroprostane	C22H32O5	C22H32O5	0	c
m00370[c]	14-hydroxy-E4-neuroprostane	C22H32O5	C22H32O5	0	c
m00371[c]	14-hydroxytetradecanoic acid	C14H28O3	C14H28O3	0	c
m00371[s]	14-hydroxytetradecanoic acid	C14H28O3	C14H28O3	0	s
m00372[c]	14-peroxy-docosahexaenoate	C22H31O4	C22H31O4	0	c
m00373[c]	15(R)-HEPE	C20H30O3	C20H30O3	0	c
m00373[n]	15(R)-HEPE	C20H30O3	C20H30O3	0	n
m00373[p]	15(R)-HEPE	C20H30O3	C20H30O3	0	p
m00373[r]	15(R)-HEPE	C20H30O3	C20H30O3	0	r
m00374[c]	15(R)-HETE	C20H32O3	C20H32O3	0	c
m00374[p]	15(R)-HETE	C20H32O3	C20H32O3	0	p
m00374[r]	15(R)-HETE	C20H32O3	C20H32O3	0	r
m00375[c]	15(R)-HpEPE	C20H30O4	C20H30O4	0	c
m00375[n]	15(R)-HpEPE	C20H30O4	C20H30O4	0	n
m00375[p]	15(R)-HpEPE	C20H30O4	C20H30O4	0	p
m00375[r]	15(R)-HpEPE	C20H30O4	C20H30O4	0	r
m00376[c]	15(S)-HEPE	C20H30O3	C20H30O3	0	c
m00377[c]	15(S)-HETE	C20H32O3	C20H32O3	0	c	C04742
m00378[c]	15(S)-HETrE	C20H34O3	C20H34O3	0	c
m00379[c]	15(S)-HpEPE	C20H30O4	C20H30O4	0	c
m00380[c]	15(S)-HPETE	C20H32O4	C20H32O4	0	c	C05966		CHEBI:15628
m00380[n]	15(S)-HPETE	C20H32O4	C20H32O4	0	n	C05966		CHEBI:15628
m00380[p]	15(S)-HPETE	C20H32O4	C20H32O4	0	p	C05966		CHEBI:15628
m00380[r]	15(S)-HPETE	C20H32O4	C20H32O4	0	r	C05966		CHEBI:15628
m00381[c]	15-dehydro-prostaglandin D2	C20H30O5	C20H30O5	0	c	C04758
m00382[c]	15-deoxy-delta-12,14-PGD2	C20H30O4	C20H30O4	0	c
m00383[c]	15-deoxy-delta-12,14-PGJ2	C20H28O3	C20H28O3	0	c	C14717
m00384[c]	15-deoxy-PGD2	C20H30O4	C20H30O4	0	c
m00385[c]	15-deoxy-prostaglandin J2	C20H28O3	C20H28O3	0	c	C14717
m00386[c]	15-epi-lipoxin A4	C20H32O5	C20H32O5	0	c
m00386[p]	15-epi-lipoxin A4	C20H32O5	C20H32O5	0	p
m00386[r]	15-epi-lipoxin A4	C20H32O5	C20H32O5	0	r
m00387[c]	15-epi-lipoxin A5	C20H29O5	C20H29O5	0	c
m00387[p]	15-epi-lipoxin A5	C20H29O5	C20H29O5	0	p
m00387[r]	15-epi-lipoxin A5	C20H29O5	C20H29O5	0	r
m00388[c]	15-epi-lipoxin B4	C20H32O5	C20H32O5	0	c
m00388[p]	15-epi-lipoxin B4	C20H32O5	C20H32O5	0	p
m00388[r]	15-epi-lipoxin B4	C20H32O5	C20H32O5	0	r
m00389[c]	15-epi-lipoxin B5	C20H30O5	C20H30O5	0	c
m00389[p]	15-epi-lipoxin B5	C20H30O5	C20H30O5	0	p
m00389[r]	15-epi-lipoxin B5	C20H30O5	C20H30O5	0	r
m00390[c]	15H-11,12-EETA	C20H32O4	C20H32O4	0	c	C14781
m00391[c]	15-HpETrE	C20H34O4	C20H34O4	0	c
m00392[c]	15-keto-prostaglandin F2alpha	C20H32O5	C20H32O5	0	c	C00639
m00393[c]	15-oxoETE	C20H30O3	C20H30O3	0	c	C04577
m00394[c]	15-oxo-lipoxin A4	C20H30O5	C20H30O5	0	c
m00395[c]	15-oxo-prostaglandin E2-glyceryl ester	C23H36O7	C23H36O7	0	c
m00396[c]	16(R)-HETE	C20H32O3	C20H32O3	0	c	C14778
m00397[p]	16(S)-hydroxy-18-oxo-18-CoA-LTE4	C42H67N8O23P3S2	C42H67N8O23P3S2	0	p
m00398[p]	16,18-oxo-18-CoA-dinor-LTE4	C42H65N8O23P3S2	C42H65N8O23P3S2	0	p
m00399[r]	16alpha-hydroxydehydroepiandrosterone	C19H28O3	C19H28O3	0	r	C05139		CHEBI:27771
m00400[c]	16alpha-hydroxyestrone	C18H22O3	C18H22O3	0	c	C05300		CHEBI:776
m00400[r]	16alpha-hydroxyestrone	C18H22O3	C18H22O3	0	r	C05300		CHEBI:776
m00401[p]	16e-18-oxo-18-CoA-dinor-LTE4	C42H65N8O22P3S2	C42H65N8O22P3S2	0	p
m00402[c]	16-glucuronide-estriol	C24H32O9	C24H32O9	0	c	C05504
m00402[r]	16-glucuronide-estriol	C24H32O9	C24H32O9	0	r	C05504
m00402[s]	16-glucuronide-estriol	C24H32O9	C24H32O9	0	s	C05504
m00403[c]	16-hydroxyhexadecanoic acid	C16H32O3	C16H32O3	0	c	C18218
m00403[s]	16-hydroxyhexadecanoic acid	C16H32O3	C16H32O3	0	s	C18218
m00404[c]	16-peroxy-docosahexaenoate	C22H31O4	C22H31O4	0	c
m00405[c]	17alpha,20alpha-dihydroxycholesterol	C27H46O3	C27H46O3	0	c	C05499		CHEBI:783
m00406[c]	17alpha,21-dihydroxypregnenolone	C21H32O4	C21H32O4	0	c	C05487		CHEBI:27832
m00407[c]	17alpha-hydroxypregnenolone sulfate	C21H32O6S	C21H32O6S	0	c
m00408[c]	17alpha-hydroxypregnenolone	C21H32O3	C21H32O3	0	c	C05138		CHEBI:28750
m00408[r]	17alpha-hydroxypregnenolone	C21H32O3	C21H32O3	0	r	C05138		CHEBI:28750
m00409[c]	17alpha-hydroxyprogesterone	C21H30O3	C21H30O3	0	c	C01176		CHEBI:17252
m00409[n]	17alpha-hydroxyprogesterone	C21H30O3	C21H30O3	0	n	C01176		CHEBI:17252
m00409[r]	17alpha-hydroxyprogesterone	C21H30O3	C21H30O3	0	r	C01176		CHEBI:17252
m00410[c]	17beta-estradiol-2,3-quinone	C18H22O3	C18H22O3	0	c
m00410[m]	17beta-estradiol-2,3-quinone	C18H22O3	C18H22O3	0	m
m00410[p]	17beta-estradiol-2,3-quinone	C18H22O3	C18H22O3	0	p
m00410[r]	17beta-estradiol-2,3-quinone	C18H22O3	C18H22O3	0	r
m00411[c]	17beta-estradiol-2,3-semiquinone	C18H22O3	C18H22O3	0	c
m00411[l]	17beta-estradiol-2,3-semiquinone	C18H22O3	C18H22O3	0	l
m00412[c]	17beta-estradiol-3,4-quinone	C18H22O3	C18H22O3	0	c
m00412[m]	17beta-estradiol-3,4-quinone	C18H22O3	C18H22O3	0	m
m00412[p]	17beta-estradiol-3,4-quinone	C18H22O3	C18H22O3	0	p
m00412[r]	17beta-estradiol-3,4-quinone	C18H22O3	C18H22O3	0	r
m00413[c]	17beta-estradiol-3,4-semiquinone	C18H22O3	C18H22O3	0	c
m00413[l]	17beta-estradiol-3,4-semiquinone	C18H22O3	C18H22O3	0	l
m00414[c]	17-HETE	C20H32O3	C20H32O3	0	c
m00415[c]	17-hydroperoxy-H4-neuroprostane	C22H32O6	C22H32O6	0	c
m00416[c]	17-hydroxy-D4-neuroprostane	C22H32O5	C22H32O5	0	c
m00417[c]	17-hydroxy-E4-neuroprostane	C22H32O5	C22H32O5	0	c
m00418[c]	17-peroxy-docosahexaenoate	C22H31O4	C22H31O4	0	c
m00419[p]	18(R)-hydroxy-20-oxo-20-CoA-LTE4	C44H69N8O23P3S2	C44H69N8O23P3S2	0	p
m00420[m]	18,20-dioxo-20-CoA-LTB4	C41H62N7O22P3S	C41H62N7O22P3S	0	m
m00420[p]	18,20-dioxo-20-CoA-LTB4	C41H62N7O22P3S	C41H62N7O22P3S	0	p
m00421[m]	18-CoA-18-oxo-dinor-LTB4	C39H60N7O21P3S	C39H60N7O21P3S	0	m
m00421[p]	18-CoA-18-oxo-dinor-LTB4	C39H60N7O21P3S	C39H60N7O21P3S	0	p
m00422[p]	18-COOH-(15E)-dinor-LTE4-CoA	C42H65N8O22P3S2	C42H65N8O22P3S2	0	p
m00423[p]	18-COOH-(16E)-dinor-LTE5-CoA	C42H58N8O22P3S2	C42H58N8O22P3S2	0	p
m00424[m]	18-COOH-LTB4	C18H26O6	C18H26O6	0	m
m00425[p]	18-COOH-LTE4	C21H31NO7S	C21H31NO7S	0	p
m00426[c]	18-HETE	C20H32O3	C20H32O3	0	c
m00427[c]	18-hydroxy-all-trans-retinoate	C20H28O3	C20H28O3	0	c	C16679
m00427[r]	18-hydroxy-all-trans-retinoate	C20H28O3	C20H28O3	0	r	C16679
m00428[r]	18-hydroxy-arachidonate	C20H32O3	C20H32O3	0	r
m00429[m]	18-hydroxycorticosterone	C21H30O5	C21H30O5	0	m	C01124
m00430[c]	19(S)-HETE	C20H32O3	C20H32O3	0	c	C14749
m00431[c]	19-hydroxyandrostenedione	C19H26O3	C19H26O3	0	c
m00432[c]	19-hydroxytestosterone	C19H28O3	C19H28O3	0	c
m00432[r]	19-hydroxytestosterone	C19H28O3	C19H28O3	0	r
m00432[s]	19-hydroxytestosterone	C19H28O3	C19H28O3	0	s
m00433[c]	19-oxoandrostenedione	C19H24O3	C19H24O3	0	c	C05297
m00434[c]	19-oxo-testosterone	C19H26O3	C19H26O3	0	c
m00435[c]	1a,11b-dihydro-4,9-dimethylbenz[a]anthra[3,4-b]oxirene	C20H16O	C20H16O	0	c	C19489
m00436[c]	1-acylglycerol-3P-10,13,16,19-doco	C25H43O7P	C25H43O7P	0	c
m00437[c]	1-acylglycerol-3P-10,13,16-docosa	C25H39O7P	C25H39O7P	0	c
m00438[c]	1-acylglycerol-3P-10-heptade	C20H39O7P	C20H39O7P	0	c
m00439[c]	1-acylglycerol-3P-11,14,17-eico	C23H41O7P	C23H41O7P	0	c
m00440[c]	1-acylglycerol-3P-11,14-eicosa	C23H43O7P	C23H43O7P	0	c
m00441[c]	1-acylglycerol-3P-11-docose	C25H49O7P	C25H49O7P	0	c
m00442[c]	1-acylglycerol-3P-11-eico	C23H45O7P	C23H45O7P	0	c
m00443[c]	1-acylglycerol-3P-12,15,18,21-tetra	C27H47O7P	C27H47O7P	0	c
m00444[c]	1-acylglycerol-3P-13,16,19-doco	C25H45O7P	C25H45O7P	0	c
m00445[c]	1-acylglycerol-3P-13,16-docosa	C25H47O7P	C25H47O7P	0	c
m00446[c]	1-acylglycerol-3P-13-docose	C25H49O7P	C25H49O7P	0	c
m00447[c]	1-acylglycerol-3P-13-eicose	C23H45O7P	C23H45O7P	0	c
m00448[c]	1-acylglycerol-3P-13-octade	C21H41O7P	C21H41O7P	0	c
m00449[c]	1-acylglycerol-3P-15-tetra	C27H53O7P	C27H53O7P	0	c
m00450[c]	1-acylglycerol-3P-4,7,10,13,16,19-doco	C25H39O7P	C25H39O7P	0	c
m00451[c]	1-acylglycerol-3P-4,7,10,13,16-docosa	C25H41O7P	C25H41O7P	0	c
m00452[c]	1-acylglycerol-3P-5,8,11,14,17-eico	C23H37O7P	C23H37O7P	0	c
m00453[c]	1-acylglycerol-3P-5,8,11-eico	C23H41O7P	C23H41O7P	0	c
m00454[c]	1-acylglycerol-3P-5-tetrade	C17H33O7P	C17H33O7P	0	c
m00455[c]	1-acylglycerol-3P-6,9,12,15,18,21-tetra	C27H43O7P	C27H43O7P	0	c
m00456[c]	1-acylglycerol-3P-6,9,12,15,18-tetraco	C27H45O7P	C27H45O7P	0	c
m00457[c]	1-acylglycerol-3P-6,9,12,15-octa	C21H35O7P	C21H35O7P	0	c
m00458[c]	1-acylglycerol-3P-6,9-octa	C21H39O7P	C21H39O7P	0	c
m00459[c]	1-acylglycerol-3P-7,10,13,16,19-docosa	C25H41O7P	C25H41O7P	0	c
m00460[c]	1-acylglycerol-3P-7,10,13,16-docosa	C25H43O7P	C25H43O7P	0	c
m00461[c]	1-acylglycerol-3P-7-hexade	C19H37O7P	C19H37O7P	0	c
m00462[c]	1-acylglycerol-3P-7-octade	C21H41O7P	C21H41O7P	0	c
m00463[c]	1-acylglycerol-3P-7-tetrade	C17H33O7P	C17H33O7P	0	c
m00464[c]	1-acylglycerol-3P-8,11,14,17-eico	C23H39O7P	C23H39O7P	0	c
m00465[c]	1-acylglycerol-3P-8,11-eico	C23H43O7P	C23H43O7P	0	c
m00466[c]	1-acylglycerol-3P-9,12,15,18,21-tetra	C27H45O7P	C27H45O7P	0	c
m00467[c]	1-acylglycerol-3P-9,12,15,18-tetraco	C27H47O7P	C27H47O7P	0	c
m00468[c]	1-acylglycerol-3P-9-eicose	C23H45O7P	C23H45O7P	0	c
m00469[c]	1-acylglycerol-3P-9-heptade	C20H39O7P	C20H39O7P	0	c
m00470[c]	1-acylglycerol-3P-9-octade	C21H41O7P	C21H41O7P	0	c
m00471[c]	1-acylglycerol-3P-9-tetrade	C17H33O7P	C17H33O7P	0	c
m00472[c]	1-acylglycerol-3P-arach	C23H39O7P	C23H39O7P	0	c
m00473[c]	1-acylglycerol-3P-bile-PC pool	C4H8O7PR	C4H8O7PR	0	c	C00681		CHEBI:16975
m00474[c]	1-acylglycerol-3P-cis-vac	C21H41O7P	C21H41O7P	0	c
m00475[m]	1-acylglycerol-3P-CL pool	C4H8O7PR	C4H8O7PR	0	m	C00681		CHEBI:16975
m00476[c]	1-acylglycerol-3P-dihomo-gamma	C23H41O7P	C23H41O7P	0	c
m00477[c]	1-acylglycerol-3P-docosa	C25H51O7P	C25H51O7P	0	c
m00478[c]	1-acylglycerol-3P-eico	C23H47O7P	C23H47O7P	0	c
m00479[c]	1-acylglycerol-3P-gamma-lin	C21H37O7P	C21H37O7P	0	c
m00480[c]	1-acylglycerol-3P-heneico	C24H49O7P	C24H49O7P	0	c
m00481[c]	1-acylglycerol-3P-heptade	C20H41O7P	C20H41O7P	0	c
m00482[c]	1-acylglycerol-3P-hexacosa	C29H59O7P	C29H59O7P	0	c
m00483[c]	1-acylglycerol-3P-hexecose	C29H57O7P	C29H57O7P	0	c
m00484[c]	1-acylglycerol-3P-laur	C15H31O7P	C15H31O7P	0	c
m00485[c]	1-acylglycerol-3P-LD-PC pool	C4H8O7PR	C4H8O7PR	0	c	C00681		CHEBI:16975
m00486[c]	1-acylglycerol-3P-LD-PE pool	C4H8O7PR	C4H8O7PR	0	c	C00681		CHEBI:16975
m00487[c]	1-acylglycerol-3P-LD-PI pool	C4H8O7PR	C4H8O7PR	0	c	C00681		CHEBI:16975
m00488[c]	1-acylglycerol-3P-LD-PS pool	C4H8O7PR	C4H8O7PR	0	c	C00681		CHEBI:16975
m00489[c]	1-acylglycerol-3P-LD-SM pool	C4H8O7PR	C4H8O7PR	0	c	C00681		CHEBI:16975
m00490[c]	1-acylglycerol-3P-LD-TG1 pool	C4H8O7PR	C4H8O7PR	0	c	C00681		CHEBI:16975
m00491[c]	1-acylglycerol-3P-lin	C21H39O7P	C21H39O7P	0	c
m00492[c]	1-acylglycerol-3P-linolen	C21H37O7P	C21H37O7P	0	c
m00493[c]	1-acylglycerol-3P-myrist	C17H35O7P	C17H35O7P	0	c
m00494[c]	1-acylglycerol-3P-nanode	C22H45O7P	C22H45O7P	0	c
m00495[c]	1-acylglycerol-3P-ol	C21H41O7P	C21H41O7P	0	c
m00496[c]	1-acylglycerol-3P-palm	C19H39O7P	C19H39O7P	0	c
m00497[c]	1-acylglycerol-3P-palmn	C19H37O7P	C19H37O7P	0	c
m00498[c]	1-acylglycerol-3P-pentade	C18H37O7P	C18H37O7P	0	c
m00499[c]	1-acylglycerol-3P-stea	C21H43O7P	C21H43O7P	0	c
m00500[c]	1-acylglycerol-3P-tetraco	C27H55O7P	C27H55O7P	0	c
m00501[c]	1-acylglycerol-3P-trico	C26H53O7P	C26H53O7P	0	c
m00502[c]	1-acylglycerol-3P-tridec	C16H33O7P	C16H33O7P	0	c
m00503[c]	1-acylglycerol-chylomicron pool	C4H7O4R	C4H7O4R	0	c	C01885		CHEBI:17408
m00503[s]	1-acylglycerol-chylomicron pool	C4H7O4R	C4H7O4R	0	s	C01885		CHEBI:17408
m00504[c]	1-acylglycerol-LD-PC pool	C4H7O4R	C4H7O4R	0	c	C01885		CHEBI:17408
m00505[c]	1-acylglycerol-LD-PE pool	C4H7O4R	C4H7O4R	0	c	C01885		CHEBI:17408
m00506[c]	1-acylglycerol-LD-PI pool	C4H7O4R	C4H7O4R	0	c	C01885		CHEBI:17408
m00507[c]	1-acylglycerol-LD-PS pool	C4H7O4R	C4H7O4R	0	c	C01885		CHEBI:17408
m00508[c]	1-acylglycerol-LD-SM pool	C4H7O4R	C4H7O4R	0	c	C01885		CHEBI:17408
m00509[c]	1-acylglycerol-LD-TG1 pool	C4H7O4R	C4H7O4R	0	c	C01885		CHEBI:17408
m00510[c]	1-acylglycerol-VLDL pool	C4H7O4R	C4H7O4R	0	c	C01885		CHEBI:17408
m00510[s]	1-acylglycerol-VLDL pool	C4H7O4R	C4H7O4R	0	s	C01885		CHEBI:17408
m00511[c]	1-acyl-PE pool	C6H13NO7PR	C6H13NO7PR	0	c	C04438
m00512[c]	1-alkenyl-2-acylglycerol	C6H8O4R2	C6H8O4R2	0	c	C03454
m00513[c]	1-alkyl-2-acetyl-sn-glycerol	C5H9O4R	C5H9O4R	0	c	C03820		CHEBI:16291
m00514[c]	1-alkyl-2-acylglycerol	C4H6O4R2	C4H6O4R2	0	c	C03201		CHEBI:52595
m00515[c]	1-alkyl-2-acylglycerophosphoethanolamine	C6H12NO7PR2	C6H12NO7PR2	0	c	C04475
m00516[c]	1-alkyl-2-lysoglycerol-3-phosphocholine	C8H20NO6PR	C8H20NO6PR	0	c	C04317
m00516[s]	1-alkyl-2-lysoglycerol-3-phosphocholine	C8H20NO6PR	C8H20NO6PR	0	s	C04317
m00517[c]	1-alkyldihydroxyacetone-phosphate	C5H10O6PR	C5H10O6PR	0	c	C03715
m00517[p]	1-alkyldihydroxyacetone-phosphate	C5H10O6PR	C5H10O6PR	0	p	C03715
m00518[m]	1-alpha,24R,25-trihydroxyvitamin D2	C28H44O4	C28H44O4	0	m
m00519[m]	1-alpha,25-dihydroxyvitamin D2	C28H44O3	C28H44O3	0	m
m00520[c]	1-deoxy-1-(N6-lysino)-D-fructose	C12H24N2O7	C12H24N2O7	0	c
m00521[c]	1D-myo-inositol-1,3,4,5,6-pentakisphosphate	C6H17O21P5	C6H17O21P5	0	c	C01284		CHEBI:16322
m00521[n]	1D-myo-inositol-1,3,4,5,6-pentakisphosphate	C6H17O21P5	C6H17O21P5	0	n	C01284		CHEBI:16322
m00522[c]	1D-myo-inositol-1,3,4,5-tetrakisphosphate	C6H16O18P4	C6H16O18P4	0	c	C01272		CHEBI:16783
m00522[n]	1D-myo-inositol-1,3,4,5-tetrakisphosphate	C6H16O18P4	C6H16O18P4	0	n	C01272		CHEBI:16783
m00523[c]	1D-myo-inositol-1,3,4,6-tetrakisphosphate	C6H16O18P4	C6H16O18P4	0	c	C04477		CHEBI:16155
m00523[n]	1D-myo-inositol-1,3,4,6-tetrakisphosphate	C6H16O18P4	C6H16O18P4	0	n	C04477		CHEBI:16155
m00524[c]	1D-myo-inositol-1,3,4-trisphosphate	C6H15O15P3	C6H15O15P3	0	c	C01243		CHEBI:18228
m00525[c]	1D-myo-inositol-1,4,5,6-tetrakisphosphate	C6H16O18P4	C6H16O18P4	0	c	C11555		CHEBI:16067
m00525[n]	1D-myo-inositol-1,4,5,6-tetrakisphosphate	C6H16O18P4	C6H16O18P4	0	n	C11555		CHEBI:16067
m00526[c]	1D-myo-inositol-1,4-bisphosphate	C6H14O12P2	C6H14O12P2	0	c	C01220		CHEBI:17816
m00526[n]	1D-myo-inositol-1,4-bisphosphate	C6H14O12P2	C6H14O12P2	0	n	C01220		CHEBI:17816
m00527[c]	1D-myo-inositol-3,4,5,6-tetrakisphosphate	C6H16O18P4	C6H16O18P4	0	c	C04520		CHEBI:15844
m00528[c]	1D-myo-inositol-3,4-bisphosphate	C6H14O12P2	C6H14O12P2	0	c	C04063		CHEBI:28858
m00529[c]	1D-myo-inositol-3-phosphate	C6H13O9P	C6H13O9P	0	c	C04006		CHEBI:18169
m00530[c]	1D-myo-inositol-4-phosphate	C6H13O9P	C6H13O9P	0	c	C03546		CHEBI:18384
m00531[c]	1D-myo-inositol-bisdiphosphate-tetrakisphosphate	C6H20O30P8	C6H20O30P8	0	c	C18058
m00531[n]	1D-myo-inositol-bisdiphosphate-tetrakisphosphate	C6H20O30P8	C6H20O30P8	0	n	C18058
m00532[c]	1-hexadecylglycerol-3-phosphate	C19H41O6P	C19H41O6P	0	c
m00533[c]	1-hydroperoxy-8-carboxyoctyl-3,4-epoxynon-(2E)-enyl-ether	C18H32O6	C18H32O6	0	c
m00534[c]	1-lyso-2-arachidonoyl-phosphatidate	C23H39O7P	C23H39O7P	0	c
m00535[c]	1-lysolecithin pool	C9H20NO7PR	C9H20NO7PR	0	c	C04233		CHEBI:16728
m00536[c]	1-methylnicotinamide	C7H9N2O	C7H9N2O	0	c	C02918		CHEBI:16797
m00536[s]	1-methylnicotinamide	C7H9N2O	C7H9N2O	0	s	C02918		CHEBI:16797
m00537[c]	1-methylpyrrolinium	C5H10N	C5H10N	0	c	C06178		CHEBI:27435
m00538[c]	1-naphthol	C10H8O	C10H8O	0	c	C11714		CHEBI:10319
m00539[c]	1-naphthylamine	C10H9N	C10H9N	0	c	C14790
m00540[c]	1-nitro-5,6-dihydroxy-dihydronaphthalene	C10H9NO4	C10H9NO4	0	c	C14801
m00541[c]	1-nitro-5-glutathionyl-6-hydroxy-5,6-dihydronaphthalene	C20H24N4O9S	C20H24N4O9S	0	c	C14806
m00542[c]	1-nitro-5-hydroxy-6-glutathionyl-5,6-dihydronaphthalene	C20H24N4O9S	C20H24N4O9S	0	c	C14805
m00543[c]	1-nitro-7-glutathionyl-8-hydroxy-7,8-dihydronaphthalene	C20H24N4O9S	C20H24N4O9S	0	c	C14804
m00544[c]	1-nitro-7-hydroxy-8-glutathionyl-7,8-dihydronaphthalene	C20H24N4O9S	C20H24N4O9S	0	c	C14803
m00545[c]	1-nitronaphthalene	C10H7NO2	C10H7NO2	0	c	C14040		CHEBI:34104
m00545[s]	1-nitronaphthalene	C10H7NO2	C10H7NO2	0	s	C14040		CHEBI:34104
m00546[c]	1-nitronaphthalene-5,6-oxide	C10H7NO3	C10H7NO3	0	c	C14800
m00547[c]	1-nitronaphthalene-7,8-oxide	C10H7NO3	C10H7NO3	0	c	C14802
m00548[c]	1-nitrosonaphthalene	C10H7NO	C10H7NO	0	c	C14788
m00549[c]	1-organyl-2-lyso-sn-glycero-3-phosphocholine	C8H20NO6PR	C8H20NO6PR	0	c	C04317
m00549[s]	1-organyl-2-lyso-sn-glycero-3-phosphocholine	C8H20NO6PR	C8H20NO6PR	0	s	C04317
m00550[p]	1-palmitoyl-dihydroxyacetone-phosphate	C19H37O7P	C19H37O7P	0	p	C01192		CHEBI:17868
m00551[c]	1-phosphatidyl-1D-myo-inositol-3,4-bisphosphate	C11H19O19P3R2	C11H19O19P3R2	0	c	C11554		CHEBI:16152
m00551[n]	1-phosphatidyl-1D-myo-inositol-3,4-bisphosphate	C11H19O19P3R2	C11H19O19P3R2	0	n	C11554		CHEBI:16152
m00552[c]	1-phosphatidyl-1D-myo-inositol-3-phosphate	C11H18O16P2R2	C11H18O16P2R2	0	c	C04549		CHEBI:17283
m00552[n]	1-phosphatidyl-1D-myo-inositol-3-phosphate	C11H18O16P2R2	C11H18O16P2R2	0	n	C04549		CHEBI:17283
m00552[r]	1-phosphatidyl-1D-myo-inositol-3-phosphate	C11H18O16P2R2	C11H18O16P2R2	0	r	C04549		CHEBI:17283
m00553[c]	1-phosphatidyl-1D-myo-inositol-4-phosphate	C11H18O16P2R2	C11H18O16P2R2	0	c	C01277		CHEBI:17526
m00553[n]	1-phosphatidyl-1D-myo-inositol-4-phosphate	C11H18O16P2R2	C11H18O16P2R2	0	n	C01277		CHEBI:17526
m00554[c]	1-phosphatidyl-1D-myo-inositol-5-phosphate	C11H18O16P2R2	C11H18O16P2R2	0	c	C11557		CHEBI:16500
m00554[g]	1-phosphatidyl-1D-myo-inositol-5-phosphate	C11H18O16P2R2	C11H18O16P2R2	0	g	C11557		CHEBI:16500
m00554[n]	1-phosphatidyl-1D-myo-inositol-5-phosphate	C11H18O16P2R2	C11H18O16P2R2	0	n	C11557		CHEBI:16500
m00554[r]	1-phosphatidyl-1D-myo-inositol-5-phosphate	C11H18O16P2R2	C11H18O16P2R2	0	r	C11557		CHEBI:16500
m00555[c]	1-phosphatidyl-myo-inositol-3,5-bisphosphate	C11H19O19P3R2	C11H19O19P3R2	0	c	C11556
m00555[g]	1-phosphatidyl-myo-inositol-3,5-bisphosphate	C11H19O19P3R2	C11H19O19P3R2	0	g	C11556
m00555[r]	1-phosphatidyl-myo-inositol-3,5-bisphosphate	C11H19O19P3R2	C11H19O19P3R2	0	r	C11556
m00556[c]	1-piperideine-6-carboxylate	C6H9NO2	C6H9NO2	0	c	C00450		CHEBI:16987
m00556[p]	1-piperideine-6-carboxylate	C6H9NO2	C6H9NO2	0	p	C00450		CHEBI:16987
m00557[c]	1-pyrroline	C4H7N	C4H7N	0	c	C15668		CHEBI:19092
m00557[m]	1-pyrroline	C4H7N	C4H7N	0	m	C15668		CHEBI:19092
m00558[c]	1-pyrroline-2-carboxylate	C5H7NO2	C5H7NO2	0	c	C03564		CHEBI:17425
m00559[c]	1-pyrroline-5-carboxylate	C5H7NO2	C5H7NO2	0	c	C03912		CHEBI:371
m00559[m]	1-pyrroline-5-carboxylate	C5H7NO2	C5H7NO2	0	m	C03912		CHEBI:371
m00560[c]	1-radyl-2-acyl-sn-glycero-3-phosphocholine	C9H19NO7PR2	C9H19NO7PR2	0	c	C05212		CHEBI:36702
m00561[c]	2-(alpha-hydroxyethyl)thiamine-diphosphate	C14H23N4O8P2S	C14H23N4O8P2S	0	c	C05125		CHEBI:978
m00562[m]	2(R),6-dimethyl-heptanoyl-CoA	C30H52N7O17P3S	C30H52N7O17P3S	0	m
m00563[c]	2(S),6-dimethyl-heptanoyl-CoA	C30H52N7O17P3S	C30H52N7O17P3S	0	c
m00563[m]	2(S),6-dimethyl-heptanoyl-CoA	C30H52N7O17P3S	C30H52N7O17P3S	0	m
m00564[p]	2(S)-pristanal	C19H38O	C19H38O	0	p
m00565[c]	2-(S-glutathionyl)acetyl chloride	C12H18ClN3O7S	C12H18ClN3O7S	0	c	C14865
m00566[c]	2-(S-glutathionyl)acetyl glutathione	C22H34N6O13S2	C22H34N6O13S2	0	c	C14863
m00567[c]	2,2-dichloro-1,1-ethanediol	C2H4Cl2O2	C2H4Cl2O2	0	c	C14860
m00568[c]	2,2-dichloroacetaldehyde	C2H2Cl2O	C2H2Cl2O	0	c	C14858
m00569[c]	2,3-bisphospho-D-glycerate	C3H8O10P2	C3H8O10P2	0	c	C01159		CHEBI:17720
m00570[c]	2,3-cyclic-UMP	C9H11N2O8P	C9H11N2O8P	0	c	C02355
m00571[c]	2,3-dihydro-2-S-glutathionyl-3-hydroxy bromobenzene	C16H22BrN3O7S	C16H22BrN3O7S	0	c	C14848
m00572[c]	2,3-diketo-5-methylthiopentyl-1-phosphate	C6H11O6PS	C6H11O6PS	0	c	C15650		CHEBI:50604
m00573[c]	2,3-diketo-L-gulonate	C6H8O7	C6H8O7	0	c	C04575		CHEBI:15622
m00574[c]	2,5-diamino-6-(5-triphosphoryl-3,4-trihydroxy-2-oxopentyl)-amino-4-oxopyrimidine	C9H18N5O14P3	C9H18N5O14P3	0	c	C06148
m00574[n]	2,5-diamino-6-(5-triphosphoryl-3,4-trihydroxy-2-oxopentyl)-amino-4-oxopyrimidine	C9H18N5O14P3	C9H18N5O14P3	0	n	C06148
m00575[c]	2,5-diaminopyrimidine nucleoside triphosphate	C9H18N5O14P3	C9H18N5O14P3	0	c	C05923
m00575[n]	2,5-diaminopyrimidine nucleoside triphosphate	C9H18N5O14P3	C9H18N5O14P3	0	n	C05923
m00576[c]	2,5-dihydroxybenzoate	C7H6O4	C7H6O4	0	c	C00628		CHEBI:17189
m00577[c]	2,6-dimethylheptanoyl-carnitine	C16H31NO4	C16H31NO4	0	c
m00577[m]	2,6-dimethylheptanoyl-carnitine	C16H31NO4	C16H31NO4	0	m
m00577[s]	2,6-dimethylheptanoyl-carnitine	C16H31NO4	C16H31NO4	0	s
m00578[m]	2,6-dimethyl-trans-2-heptenoyl-CoA	C30H50N7O17P3S	C30H50N7O17P3S	0	m
m00579[c]	20alpha,22beta dihydroxycholesterol	C27H46O3	C27H46O3	0	c	C05501		CHEBI:1294
m00579[m]	20alpha,22beta dihydroxycholesterol	C27H46O3	C27H46O3	0	m	C05501		CHEBI:1294
m00580[c]	20alpha-hydroxy-4-pregnen-3-one	C21H32O2	C21H32O2	0	c	C04042		CHEBI:28453
m00580[s]	20alpha-hydroxy-4-pregnen-3-one	C21H32O2	C21H32O2	0	s	C04042		CHEBI:28453
m00581[m]	20-CoA-20-oxo-18r-hydroxy-LTB4	C41H64N7O22P3S	C41H64N7O22P3S	0	m
m00581[p]	20-CoA-20-oxo-18r-hydroxy-LTB4	C41H64N7O22P3S	C41H64N7O22P3S	0	p
m00582[c]	20-CoA-20-oxo-LTB4	C41H64N7O21P3S	C41H64N7O21P3S	0	c
m00582[m]	20-CoA-20-oxo-LTB4	C41H64N7O21P3S	C41H64N7O21P3S	0	m
m00582[p]	20-CoA-20-oxo-LTB4	C41H64N7O21P3S	C41H64N7O21P3S	0	p
m00582[r]	20-CoA-20-oxo-LTB4	C41H64N7O21P3S	C41H64N7O21P3S	0	r
m00583[c]	20-COOH-10,11-dihydro-LTB4	C20H32O6	C20H32O6	0	c
m00583[m]	20-COOH-10,11-dihydro-LTB4	C20H32O6	C20H32O6	0	m
m00583[p]	20-COOH-10,11-dihydro-LTB4	C20H32O6	C20H32O6	0	p
m00584[p]	20-COOH-18-oxo-LTE4-CoA	C44H67N8O23P3S2	C44H67N8O23P3S2	0	p
m00585[c]	20-COOH-LTB4	C20H30O6	C20H30O6	0	c
m00585[m]	20-COOH-LTB4	C20H30O6	C20H30O6	0	m
m00585[p]	20-COOH-LTB4	C20H30O6	C20H30O6	0	p
m00585[r]	20-COOH-LTB4	C20H30O6	C20H30O6	0	r
m00586[p]	20-COOH-LTE4	C23H35NO7S	C23H35NO7S	0	p
m00587[p]	20-COOH-LTE4-CoA	C44H69N8O22P3S2	C44H69N8O22P3S2	0	p
m00588[c]	20-dihydroxy-LTB4	C20H32O6	C20H32O6	0	c	C04853
m00588[r]	20-dihydroxy-LTB4	C20H32O6	C20H32O6	0	r	C04853
m00589[c]	20-hydroperoxy-H4-neuroprostane	C22H32O6	C22H32O6	0	c
m00590[c]	20-hydroxy-5S-HETE	C20H32O4	C20H32O4	0	c
m00591[c]	20-hydroxy-arachidonate	C20H32O3	C20H32O3	0	c	C14748		CHEBI:34306
m00591[s]	20-hydroxy-arachidonate	C20H32O3	C20H32O3	0	s	C14748		CHEBI:34306
m00592[c]	20-hydroxycholesterol	C27H46O2	C27H46O2	0	c	C05500		CHEBI:1296
m00592[r]	20-hydroxycholesterol	C27H46O2	C27H46O2	0	r	C05500		CHEBI:1296
m00593[c]	20-hydroxy-D4-neuroprostane	C22H32O5	C22H32O5	0	c
m00594[c]	20-hydroxy-E4-neuroprostane	C22H32O5	C22H32O5	0	c
m00595[c]	20-hydroxy-LTB5	C20H29O5	C20H29O5	0	c
m00595[r]	20-hydroxy-LTB5	C20H29O5	C20H29O5	0	r
m00596[p]	20-hydroxy-LTE4	C23H37NO5S	C23H37NO5S	0	p	C03577		CHEBI:28700
m00597[c]	20-OH-10,11-dihydro-LTB4	C20H34O5	C20H34O5	0	c
m00597[r]	20-OH-10,11-dihydro-LTB4	C20H34O5	C20H34O5	0	r
m00598[c]	20-OH-hepoxilin A3	C20H32O5	C20H32O5	0	c
m00598[r]	20-OH-hepoxilin A3	C20H32O5	C20H32O5	0	r
m00599[c]	20-OH-LTB4	C20H32O5	C20H32O5	0	c	C04853		CHEBI:15646
m00599[m]	20-OH-LTB4	C20H32O5	C20H32O5	0	m	C04853		CHEBI:15646
m00599[r]	20-OH-LTB4	C20H32O5	C20H32O5	0	r	C04853		CHEBI:15646
m00600[c]	20-oxo-LTB4	C20H30O5	C20H30O5	0	c
m00600[m]	20-oxo-LTB4	C20H30O5	C20H30O5	0	m
m00600[r]	20-oxo-LTB4	C20H30O5	C20H30O5	0	r
m00601[p]	20-oxo-LTE4	C23H35NO6S	C23H35NO6S	0	p
m00602[c]	20-trihydroxy-LTB4	C20H32O7	C20H32O7	0	c
m00602[r]	20-trihydroxy-LTB4	C20H32O7	C20H32O7	0	r
m00603[c]	21-deoxycortisol	C21H30O4	C21H30O4	0	c	C05497
m00604[c]	21-hydroxyallopregnanolone	C21H34O3	C21H34O3	0	c
m00605[c]	21-hydroxypregnenolone	C21H32O3	C21H32O3	0	c	C05485		CHEBI:28043
m00606[m]	22beta-hydroxycholesterol	C27H46O2	C27H46O2	0	m	C05502		CHEBI:1301
m00607[c]	23S,25,26-trihydroxyvitamin D3	C27H44O4	C27H44O4	0	c
m00607[m]	23S,25,26-trihydroxyvitamin D3	C27H44O4	C27H44O4	0	m
m00608[c]	23s,25-dihydroxyvitamin D3	C27H44O3	C27H44O3	0	c
m00608[m]	23s,25-dihydroxyvitamin D3	C27H44O3	C27H44O3	0	m
m00609[c]	24,25-dihydrolanosterol	C30H52O	C30H52O	0	c	C05109		CHEBI:28113
m00610[c]	24-hydroxycholesterol	C27H46O2	C27H46O2	0	c	C13550
m00611[c]	24-oxo-1alpha,23,25-trihydroxyvitamin D3	C27H42O5	C27H42O5	0	c
m00611[m]	24-oxo-1alpha,23,25-trihydroxyvitamin D3	C27H42O5	C27H42O5	0	m
m00612[c]	24-oxo-1alpha,25-dihydroxyvitamin D3	C27H42O4	C27H42O4	0	c
m00612[m]	24-oxo-1alpha,25-dihydroxyvitamin D3	C27H42O4	C27H42O4	0	m
m00613[c]	24R,25-dihyoxyvitamin D2	C28H44O3	C28H44O3	0	c
m00613[m]	24R,25-dihyoxyvitamin D2	C28H44O3	C28H44O3	0	m
m00613[s]	24R,25-dihyoxyvitamin D2	C28H44O3	C28H44O3	0	s
m00614[c]	25(R)DHCA-CoA	C48H80N7O19P3S	C48H80N7O19P3S	0	c	C17345		CHEBI:48474;CHEBI:15494
m00614[p]	25(R)DHCA-CoA	C48H80N7O19P3S	C48H80N7O19P3S	0	p	C17345		CHEBI:48474;CHEBI:15494
m00614[r]	25(R)DHCA-CoA	C48H80N7O19P3S	C48H80N7O19P3S	0	r	C17345		CHEBI:48474;CHEBI:15494
m00615[c]	25(R)TetraHCA-CoA	C48H80N7O21P3S	C48H80N7O21P3S	0	c
m00615[p]	25(R)TetraHCA-CoA	C48H80N7O21P3S	C48H80N7O21P3S	0	p
m00616[c]	25(R)THCA-CoA	C48H80N7O20P3S	C48H80N7O20P3S	0	c	C15613		CHEBI:37642;CHEBI:15493
m00616[m]	25(R)THCA-CoA	C48H80N7O20P3S	C48H80N7O20P3S	0	m	C15613		CHEBI:37642;CHEBI:15493
m00616[p]	25(R)THCA-CoA	C48H80N7O20P3S	C48H80N7O20P3S	0	p	C15613		CHEBI:37642;CHEBI:15493
m00616[r]	25(R)THCA-CoA	C48H80N7O20P3S	C48H80N7O20P3S	0	r	C15613		CHEBI:37642;CHEBI:15493
m00617[p]	25(S)DHCA-CoA	C48H80N7O19P3S	C48H80N7O19P3S	0	p	C17346
m00618[m]	25(S)THCA-CoA	C48H80N7O20P3S	C48H80N7O20P3S	0	m	C17343		CHEBI:37643
m00618[p]	25(S)THCA-CoA	C48H80N7O20P3S	C48H80N7O20P3S	0	p	C17343		CHEBI:37643
m00619[r]	25-hydroxycholesterol	C27H46O2	C27H46O2	0	r	C15519
m00620[c]	25-hydroxyvitamin D2	C28H44O2	C28H44O2	0	c
m00620[m]	25-hydroxyvitamin D2	C28H44O2	C28H44O2	0	m
m00620[s]	25-hydroxyvitamin D2	C28H44O2	C28H44O2	0	s
m00621[c]	25-hydroxyvitamin D3-26,23-lactol	C27H42O4	C27H42O4	0	c
m00621[m]	25-hydroxyvitamin D3-26,23-lactol	C27H42O4	C27H42O4	0	m
m00622[c]	25-hydroxyvitamin D3-26,23-lactone	C27H40O4	C27H40O4	0	c
m00622[m]	25-hydroxyvitamin D3-26,23-lactone	C27H40O4	C27H40O4	0	m
m00623[c]	26-hydroxycholesterol	C27H46O2	C27H46O2	0	c	C15610		CHEBI:17703
m00623[m]	26-hydroxycholesterol	C27H46O2	C27H46O2	0	m	C15610		CHEBI:17703
m00623[r]	26-hydroxycholesterol	C27H46O2	C27H46O2	0	r	C15610		CHEBI:17703
m00624[c]	27alpha-hydroxy-7-dehydrocholesterol	C27H44O2	C27H44O2	0	c
m00625[c]	27-hydroxycholesterol	C27H46O2	C27H46O2	0	c	C15610
m00625[m]	27-hydroxycholesterol	C27H46O2	C27H46O2	0	m	C15610
m00626[c]	2-acetyl-1-alkyl-sn-glycero-3-phosphocholine	C10H22NO7PR	C10H22NO7PR	0	c	C04598		CHEBI:36707
m00626[s]	2-acetyl-1-alkyl-sn-glycero-3-phosphocholine	C10H22NO7PR	C10H22NO7PR	0	s	C04598		CHEBI:36707
m00627[c]	2-acyl-1-(1-alkenyl)-sn-glycero-3-phosphate	C6H9O7PR2	C6H9O7PR2	0	c	C15647
m00628[c]	2-acyl-1-alkyl-sn-glycero-3-phosphate	C4H7O7PR2	C4H7O7PR2	0	c	C05977
m00629[c]	2-amino-3-carboxymuconate semialdehyde	C7H7NO5	C7H7NO5	0	c	C04409		CHEBI:995
m00630[m]	2-amino-3-oxoadipate	C6H9NO5	C6H9NO5	0	m	C05520
m00631[c]	2-aminoadipate 6-semialdehyde	C6H11NO3	C6H11NO3	0	c	C04076		CHEBI:17917
m00631[m]	2-aminoadipate 6-semialdehyde	C6H11NO3	C6H11NO3	0	m	C04076		CHEBI:17917
m00632[c]	2-aminoethylphosphonate	C2H8NO3P	C2H8NO3P	0	c	C03557		CHEBI:15573
m00633[c]	2-aminomuconate semialdehyde	C6H7NO3	C6H7NO3	0	c	C03824		CHEBI:15745
m00634[c]	2-aminomuconate	C6H7NO4	C6H7NO4	0	c	C02220		CHEBI:16886
m00635[c]	2-arachidonoylglycerol	C23H38O4	C23H38O4	0	c	C13856		CHEBI:52392
m00636[c]	2-bromoacetaldehyde	C2H3BrO	C2H3BrO	0	c	C14870
m00637[c]	2-bromophenol	C6H5BrO	C6H5BrO	0	c	C14841
m00638[c]	2-carboxy-2,3-dihydro-5,6-dihydroxyindole	C9H9NO4	C9H9NO4	0	c	C05604
m00639[c]	2-deoxy-D-ribose-1-phosphate	C5H11O7P	C5H11O7P	0	c	C00672		CHEBI:28542
m00640[c]	2-deoxy-D-ribose-5-phosphate	C5H11O7P	C5H11O7P	0	c	C00673		CHEBI:16132
m00641[c]	2-hydroxy-17beta-estradiol-1-S-glutathione	C28H39N3O9S	C28H39N3O9S	0	c
m00641[m]	2-hydroxy-17beta-estradiol-1-S-glutathione	C28H39N3O9S	C28H39N3O9S	0	m
m00641[p]	2-hydroxy-17beta-estradiol-1-S-glutathione	C28H39N3O9S	C28H39N3O9S	0	p
m00641[r]	2-hydroxy-17beta-estradiol-1-S-glutathione	C28H39N3O9S	C28H39N3O9S	0	r
m00642[c]	2-hydroxy-17beta-estradiol-4-S-glutathione	C28H39N3O9S	C28H39N3O9S	0	c
m00642[m]	2-hydroxy-17beta-estradiol-4-S-glutathione	C28H39N3O9S	C28H39N3O9S	0	m
m00642[p]	2-hydroxy-17beta-estradiol-4-S-glutathione	C28H39N3O9S	C28H39N3O9S	0	p
m00642[r]	2-hydroxy-17beta-estradiol-4-S-glutathione	C28H39N3O9S	C28H39N3O9S	0	r
m00643[c]	2-hydroxy-3-(4-hydroxyphenyl)propenoate	C9H8O4	C9H8O4	0	c	C05350		CHEBI:27683
m00644[c]	2-hydroxy-3-methoxy-17beta-estradiol	C19H26O3	C19H26O3	0	c	C05302
m00645[c]	2-hydroxy-3-methoxyestrone	C19H24O3	C19H24O3	0	c	C05299
m00646[c]	2-hydroxy-3-oxopropanoate	C3H4O4	C3H4O4	0	c	C01146		CHEBI:16992
m00647[c]	2-hydroxy-3-phenylpropenoate	C9H8O3	C9H8O3	0	c	C02763
m00648[c]	2-hydroxybutyrate	C4H8O3	C4H8O3	0	c	C05984
m00648[s]	2-hydroxybutyrate	C4H8O3	C4H8O3	0	s	C05984
m00649[c]	2-hydroxyestradiol-17beta	C18H24O3	C18H24O3	0	c	C05301		CHEBI:28744
m00649[l]	2-hydroxyestradiol-17beta	C18H24O3	C18H24O3	0	l	C05301		CHEBI:28744
m00649[r]	2-hydroxyestradiol-17beta	C18H24O3	C18H24O3	0	r	C05301		CHEBI:28744
m00650[c]	2-hydroxyestrone	C18H22O3	C18H22O3	0	c	C05298		CHEBI:1156
m00650[l]	2-hydroxyestrone	C18H22O3	C18H22O3	0	l	C05298		CHEBI:1156
m00650[r]	2-hydroxyestrone	C18H22O3	C18H22O3	0	r	C05298		CHEBI:1156
m00651[c]	2-hydroxyestrone-1-S-glutathione	C28H37N3O9S	C28H37N3O9S	0	c
m00651[m]	2-hydroxyestrone-1-S-glutathione	C28H37N3O9S	C28H37N3O9S	0	m
m00651[p]	2-hydroxyestrone-1-S-glutathione	C28H37N3O9S	C28H37N3O9S	0	p
m00651[r]	2-hydroxyestrone-1-S-glutathione	C28H37N3O9S	C28H37N3O9S	0	r
m00652[c]	2-hydroxyestrone-4-S-glutathione	C28H37N3O9S	C28H37N3O9S	0	c
m00652[m]	2-hydroxyestrone-4-S-glutathione	C28H37N3O9S	C28H37N3O9S	0	m
m00652[p]	2-hydroxyestrone-4-S-glutathione	C28H37N3O9S	C28H37N3O9S	0	p
m00652[r]	2-hydroxyestrone-4-S-glutathione	C28H37N3O9S	C28H37N3O9S	0	r
m00653[c]	2-hydroxyglutarate	C5H8O5	C5H8O5	0	c	C02630		CHEBI:17084
m00654[c]	2-hydroxyphenylacetate	C8H8O3	C8H8O3	0	c	C05852		CHEBI:28478
m00655[p]	2-hydroxyphytanoyl-CoA	C41H74N7O18P3S	C41H74N7O18P3S	0	p	C07343
m00656[c]	2-lysolecithin pool	C9H20NO7PR	C9H20NO7PR	0	c	C04230		CHEBI:17504
m00656[l]	2-lysolecithin pool	C9H20NO7PR	C9H20NO7PR	0	l	C04230		CHEBI:17504
m00656[r]	2-lysolecithin pool	C9H20NO7PR	C9H20NO7PR	0	r	C04230		CHEBI:17504
m00657[m]	2-methoxy-6-(all-trans-decaprenyl)phenol	C57H88O2	C57H88O2	0	m			CHEBI:50774
m00658[m]	2-methoxy-6-all trans-decaprenyl-2-methoxy-1,4-benzoquinol	C57H90O3	C57H90O3	0	m
m00659[c]	2-methoxyestradiol-17beta	C19H26O3	C19H26O3	0	c	C05302		CHEBI:28955
m00660[c]	2-methoxyestrone	C19H24O3	C19H24O3	0	c	C05299		CHEBI:1189
m00660[r]	2-methoxyestrone	C19H24O3	C19H24O3	0	r	C05299		CHEBI:1189
m00661[c]	2-methyl-3-oxopropanoate	C4H6O3	C4H6O3	0	c	C00349		CHEBI:16256
m00661[m]	2-methyl-3-oxopropanoate	C4H6O3	C4H6O3	0	m	C00349		CHEBI:16256
m00662[m]	2-methylacetoacetyl-CoA	C26H42N7O18P3S	C26H42N7O18P3S	0	m	C03344		CHEBI:15476
m00663[m]	2-methylbutyryl-CoA	C26H44N7O17P3S	C26H44N7O17P3S	0	m	C01033		CHEBI:15477
m00664[m]	2-methylbutyrylglycine	C7H13NO3	C7H13NO3	0	m
m00665[c]	2-methylcitrate	C7H10O7	C7H10O7	0	c	C02225		CHEBI:15598
m00665[s]	2-methylcitrate	C7H10O7	C7H10O7	0	s	C02225		CHEBI:15598
m00666[m]	2-methylglutaconic acid	C6H8O4	C6H8O4	0	m
m00667[m]	2-methylglutaconyl-CoA	C27H42N7O19P3S	C27H42N7O19P3S	0	m
m00668[c]	2-naphthol	C10H8O	C10H8O	0	c	C11713		CHEBI:10432
m00669[c]	2-oxo-3-methylvalerate	C6H10O3	C6H10O3	0	c	C03465		CHEBI:28654
m00669[m]	2-oxo-3-methylvalerate	C6H10O3	C6H10O3	0	m	C03465		CHEBI:28654
m00670[c]	2-oxoadipate	C6H8O5	C6H8O5	0	c	C00322		CHEBI:15753
m00670[m]	2-oxoadipate	C6H8O5	C6H8O5	0	m	C00322		CHEBI:15753
m00671[c]	2-oxobutyrate	C4H6O3	C4H6O3	0	c	C00109		CHEBI:30831;CHEBI:16763
m00671[m]	2-oxobutyrate	C4H6O3	C4H6O3	0	m	C00109		CHEBI:30831;CHEBI:16763
m00672[c]	2-oxoglutaramate	C5H7NO4	C5H7NO4	0	c	C00940		CHEBI:30882
m00672[m]	2-oxoglutaramate	C5H7NO4	C5H7NO4	0	m	C00940		CHEBI:30882
m00673[c]	2-phenylacetamide	C8H9NO	C8H9NO	0	c	C02505		CHEBI:16562
m00674[c]	2-phospho-D-glycerate	C3H7O7P	C3H7O7P	0	c	C00631		CHEBI:17835
m00675[c]	2-phosphoglycolate	C2H5O6P	C2H5O6P	0	c	C00988		CHEBI:17150
m00676[c]	2-S-glutathionyl acetate	C12H19N3O8S	C12H19N3O8S	0	c	C14862
m00677[c]	2-trans,6-trans-farnesal	C15H24O	C15H24O	0	c	C03461		CHEBI:15894
m00678[m]	2-trans-4-cis-decadienoyl-CoA	C31H50N7O17P3S	C31H50N7O17P3S	0	m
m00678[p]	2-trans-4-cis-decadienoyl-CoA	C31H50N7O17P3S	C31H50N7O17P3S	0	p
m00679[c]	2-trans-7,10,13,16,19-all-cis-docosahexaenoyl-CoA	C43H66N7O17P3S	C43H66N7O17P3S	0	c
m00680[c]	2-trans-9,12,15,18,21-all-cis-tetracosahexaenoyl-CoA	C45H70N7O17P3S	C45H70N7O17P3S	0	c
m00681[c]	2-trans-9,12,15,18-all-cis-tetracosapentaenoyl-CoA	C45H72N7O17P3S	C45H72N7O17P3S	0	c
m00682[m]	2-trans-cis,cis,cis,cis-4,8,11,14-eicosapentaenoyl-CoA	C41H64N7O17P3S	C41H64N7O17P3S	0	m
m00682[p]	2-trans-cis,cis,cis,cis-4,8,11,14-eicosapentaenoyl-CoA	C41H64N7O17P3S	C41H64N7O17P3S	0	p
m00683[c]	3-(acyloxy)acyl group of bacterial toxin	C54H89N2O25P2R7	C54H89N2O25P2R7	0	c	C11547
m00684[c]	3-(methylthio)propionic acid	C4H8O2S	C4H8O2S	0	c	C08276		CHEBI:1438
m00685[p]	3(R)-hydroxy-(2S,6R,10)-trimethyl-hendecanoyl-CoA	C35H62N7O18P3S	C35H62N7O18P3S	0	p
m00686[p]	3(R)-hydroxy-(4R,8R,12R)-trimethyl-tridecanoyl-CoA	C37H66N7O18P3S	C37H66N7O18P3S	0	p
m00687[m]	3(S),10(R)-OH-octadeca-6-trans-4,12-cis-trienoate	C18H30O4	C18H30O4	0	m
m00687[p]	3(S),10(R)-OH-octadeca-6-trans-4,12-cis-trienoate	C18H30O4	C18H30O4	0	p
m00688[m]	3(S),10(R)-OH-octadeca-6-trans-4,12-cis-trienoyl-CoA	C39H64N7O19P3S	C39H64N7O19P3S	0	m
m00688[p]	3(S),10(R)-OH-octadeca-6-trans-4,12-cis-trienoyl-CoA	C39H64N7O19P3S	C39H64N7O19P3S	0	p
m00689[m]	3(S),12(R)-dihydroxy-5-oxo-eicosa-(8E,10E,14Z)-trienoyl-CoA	C41H66N7O20P3S	C41H66N7O20P3S	0	m
m00689[p]	3(S),12(R)-dihydroxy-5-oxo-eicosa-(8E,10E,14Z)-trienoyl-CoA	C41H66N7O20P3S	C41H66N7O20P3S	0	p
m00690[m]	3(S),12(S)-dihydroxy-5-oxo-eicosa-(8E,10E,14Z)-trienoyl-CoA	C41H66N7O20P3S	C41H66N7O20P3S	0	m
m00690[p]	3(S),12(S)-dihydroxy-5-oxo-eicosa-(8E,10E,14Z)-trienoyl-CoA	C41H66N7O20P3S	C41H66N7O20P3S	0	p
m00691[m]	3(S),5(S),12(R)-trihydroxy-eicosa-8-trans-6,14-cis-trienoyl-CoA	C41H68N7O20P3S	C41H68N7O20P3S	0	m
m00691[p]	3(S),5(S),12(R)-trihydroxy-eicosa-8-trans-6,14-cis-trienoyl-CoA	C41H68N7O20P3S	C41H68N7O20P3S	0	p
m00692[m]	3(S),6(R)-dihydroxy-tetradec-(8Z)-enoate	C14H26O4	C14H26O4	0	m
m00693[m]	3(S),6(S)-dihydroxy-tetradec-(8Z)-enoate	C14H26O4	C14H26O4	0	m
m00694[m]	3(S),8(R)-dihydroxy-(6E,10Z)-hexadecadienoate	C16H28O4	C16H28O4	0	m
m00695[m]	3(S),8(S)-dihydroxy-(6E,10Z)-hexadecadienoate	C16H28O4	C16H28O4	0	m
m00696[m]	3(S)-hydroxy-(5Z,8Z)-tetradecadienoyl-CoA	C35H58N7O18P3S	C35H58N7O18P3S	0	m
m00696[p]	3(S)-hydroxy-(5Z,8Z)-tetradecadienoyl-CoA	C35H58N7O18P3S	C35H58N7O18P3S	0	p
m00697[m]	3(S)-hydroxy-(6Z,9Z,12Z)-octadecatrienoyl-CoA	C39H64N7O18P3S	C39H64N7O18P3S	0	m
m00697[p]	3(S)-hydroxy-(6Z,9Z,12Z)-octadecatrienoyl-CoA	C39H64N7O18P3S	C39H64N7O18P3S	0	p
m00698[c]	3(S)-hydroxy-10,13,16-all-cis-docosatrienoyl-CoA	C43H72N7O18P3S	C43H72N7O18P3S	0	c
m00699[c]	3(S)-hydroxy-11-cis-docosenoyl-CoA	C43H76N7O18P3S	C43H76N7O18P3S	0	c
m00700[c]	3(S)-hydroxy-11-cis-eicosenoyl-CoA	C41H72N7O18P3S	C41H72N7O18P3S	0	c
m00700[m]	3(S)-hydroxy-11-cis-eicosenoyl-CoA	C41H72N7O18P3S	C41H72N7O18P3S	0	m
m00700[p]	3(S)-hydroxy-11-cis-eicosenoyl-CoA	C41H72N7O18P3S	C41H72N7O18P3S	0	p
m00701[c]	3(S)-hydroxy-13-cis-docosenoyl-CoA	C43H76N7O18P3S	C43H76N7O18P3S	0	c
m00701[m]	3(S)-hydroxy-13-cis-docosenoyl-CoA	C43H76N7O18P3S	C43H76N7O18P3S	0	m
m00701[p]	3(S)-hydroxy-13-cis-docosenoyl-CoA	C43H76N7O18P3S	C43H76N7O18P3S	0	p
m00702[c]	3(S)-hydroxy-13-cis-eicosenoyl-CoA	C41H72N7O18P3S	C41H72N7O18P3S	0	c
m00702[m]	3(S)-hydroxy-13-cis-eicosenoyl-CoA	C41H72N7O18P3S	C41H72N7O18P3S	0	m
m00702[p]	3(S)-hydroxy-13-cis-eicosenoyl-CoA	C41H72N7O18P3S	C41H72N7O18P3S	0	p
m00703[m]	3(S)-hydroxy-2(S),6-dimethyl-heptanoyl-CoA	C30H52N7O18P3S	C30H52N7O18P3S	0	m
m00704[c]	3(S)-hydroxy-3-oxo-eicosadienoyl-CoA	C41H70N7O18P3S	C41H70N7O18P3S	0	c
m00705[m]	3(S)-hydroxy-4(R),8-dimethyl-nonanoyl-CoA	C32H56N7O18P3S	C32H56N7O18P3S	0	m
m00706[m]	3(S)-hydroxy-4-methyl-pentanoyl-CoA	C27H46N7O18P3S	C27H46N7O18P3S	0	m
m00707[c]	3(S)-hydroxy-9-cis-eicosenoyl-CoA	C41H72N7O18P3S	C41H72N7O18P3S	0	c
m00708[c]	3(S)-hydroxy-all-cis-8,11,14,17-eicosatetraenoyl-CoA	C41H66N7O18P3S	C41H66N7O18P3S	0	c
m00709[c]	3(S)-hydroxy-cis-15-tetracosaenoyl-CoA	C45H80N7O18P3S	C45H80N7O18P3S	0	c
m00709[p]	3(S)-hydroxy-cis-15-tetracosaenoyl-CoA	C45H80N7O18P3S	C45H80N7O18P3S	0	p
m00710[c]	3(S)-hydroxy-dihomo-gamma-linolenoyl-CoA	C41H68N7O18P3S	C41H68N7O18P3S	0	c
m00710[m]	3(S)-hydroxy-dihomo-gamma-linolenoyl-CoA	C41H68N7O18P3S	C41H68N7O18P3S	0	m
m00710[p]	3(S)-hydroxy-dihomo-gamma-linolenoyl-CoA	C41H68N7O18P3S	C41H68N7O18P3S	0	p
m00711[c]	3(S)-hydroxy-docosa-10,13,16,19-all-cis-tetraenoyl-CoA	C43H70N7O18P3S	C43H70N7O18P3S	0	c
m00712[c]	3(S)-hydroxy-docosa-13,16,19-all-cis-trienoyl-CoA	C43H72N7O18P3S	C43H72N7O18P3S	0	c
m00713[c]	3(S)-hydroxy-docosa-7,10,13,16,19-all-cis-pentaenoyl-CoA	C43H68N7O18P3S	C43H68N7O18P3S	0	c
m00714[c]	3(S)-hydroxy-docosa-7,10,13,16-all-cis-tetraenoyl-CoA	C43H70N7O18P3S	C43H70N7O18P3S	0	c
m00715[c]	3(S)-hydroxy-hexacosenoyl-CoA	C47H84N7O18P3S	C47H84N7O18P3S	0	c
m00715[p]	3(S)-hydroxy-hexacosenoyl-CoA	C47H84N7O18P3S	C47H84N7O18P3S	0	p
m00716[c]	3(S)-hydroxy-tetracosa-12,15,18,21-all-cis-tetraenoyl-CoA	C45H74N7O18P3S	C45H74N7O18P3S	0	c
m00717[p]	3(S)-hydroxy-tetracosa-6,9,12,15,18-all-cis-pentaenoyl-CoA	C45H72N7O18P3S	C45H72N7O18P3S	0	p
m00718[c]	3(S)-hydroxy-tetracosa-9,12,15,18,21-all-cis-pentaenoyl-CoA	C45H72N7O18P3S	C45H72N7O18P3S	0	c
m00719[c]	3,3,5-triiodo-L-thyronine-beta-D-glucuronoside	C21H20I3NO10	C21H20I3NO10	0	c
m00719[r]	3,3,5-triiodo-L-thyronine-beta-D-glucuronoside	C21H20I3NO10	C21H20I3NO10	0	r
m00720[c]	3,3-diiodo-L-thyronine	C15H13I2NO4	C15H13I2NO4	0	c
m00720[r]	3,3-diiodo-L-thyronine	C15H13I2NO4	C15H13I2NO4	0	r
m00721[c]	3,3-diiodo-L-thyronine-4-O-sulfate	C15H13I2NO7S	C15H13I2NO7S	0	c
m00722[c]	3,3-diiodo-L-thyronine-beta-D-glucuronoside	C21H21I2NO10	C21H21I2NO10	0	c
m00722[r]	3,3-diiodo-L-thyronine-beta-D-glucuronoside	C21H21I2NO10	C21H21I2NO10	0	r
m00723[c]	3,4-dihydro-1,4-benzothiazine-3-carboxylate	C12H14N2O5S	C12H14N2O5S	0	c
m00724[c]	3,4-dihydro-3-hydroxy-4-S-glutathionyl bromobenzene	C16H22BrN3O7S	C16H22BrN3O7S	0	c	C14847
m00725[m]	3,4-dihydroxy-5-all-trans-decaprenylbenzoate	C57H86O4	C57H86O4	0	m
m00726[c]	3,4-dihydroxymandelaldehyde	C8H8O4	C8H8O4	0	c	C05577
m00727[c]	3,4-dihydroxymandelate	C8H8O5	C8H8O5	0	c	C05580
m00728[c]	3,4-dihydroxyphenylacetaldehyde	C8H8O3	C8H8O3	0	c	C04043
m00729[c]	3,4-dihydroxyphenylacetate	C8H8O4	C8H8O4	0	c	C01161		CHEBI:41941
m00730[c]	3,4-dihydroxyphenylethyleneglycol	C8H10O4	C8H10O4	0	c	C05576
m00730[s]	3,4-dihydroxyphenylethyleneglycol	C8H10O4	C8H10O4	0	s	C05576
m00731[c]	3,4-epoxynonanal	C9H16O2	C9H16O2	0	c
m00732[c]	3,5,3,5-tetraiodo-L-thyronine-beta-D-glucuronoside	C21H19I4NO10	C21H19I4NO10	0	c
m00732[r]	3,5,3,5-tetraiodo-L-thyronine-beta-D-glucuronoside	C21H19I4NO10	C21H19I4NO10	0	r
m00733[c]	3,5,3-triiodo-L-thyronine-beta-D-glucuronoside	C21H20I3NO10	C21H20I3NO10	0	c
m00733[r]	3,5,3-triiodo-L-thyronine-beta-D-glucuronoside	C21H20I3NO10	C21H20I3NO10	0	r
m00734[c]	3,5,3-triiodothyronine-4-sulfate	C15H12I3NO7S	C15H12I3NO7S	0	c			CHEBI:35432
m00734[s]	3,5,3-triiodothyronine-4-sulfate	C15H12I3NO7S	C15H12I3NO7S	0	s			CHEBI:35432
m00735[c]	3,5-dihydroxy-3,4-dihydro-1,4-benzothiazine	C11H14N2O4S	C11H14N2O4S	0	c
m00736[c]	3,5-diiodo-L-thyronine	C15H13I2NO4	C15H13I2NO4	0	c
m00736[r]	3,5-diiodo-L-thyronine	C15H13I2NO4	C15H13I2NO4	0	r
m00737[c]	3,5-diiodo-L-thyronine-4-O-sulfate	C15H13I2NO7S	C15H13I2NO7S	0	c
m00738[c]	3,5-diiodo-L-thyronine-beta-D-glucuronoside	C21H21I2NO10	C21H21I2NO10	0	c
m00738[r]	3,5-diiodo-L-thyronine-beta-D-glucuronoside	C21H21I2NO10	C21H21I2NO10	0	r
m00739[c]	3,5-diiodo-L-tyrosine	C9H9I2NO3	C9H9I2NO3	0	c	C01060		CHEBI:15768
m00740[m]	3,5-dioxo-12(R)-hydroxy-eicosa-(8E,10E,14Z)-trienoyl-CoA	C41H64N7O20P3S	C41H64N7O20P3S	0	m
m00740[p]	3,5-dioxo-12(R)-hydroxy-eicosa-(8E,10E,14Z)-trienoyl-CoA	C41H64N7O20P3S	C41H64N7O20P3S	0	p
m00741[m]	3,5-dioxo-12(S)-hydroxy-eicosa-(8E,10E,14Z)-trienoyl-CoA	C41H64N7O20P3S	C41H64N7O20P3S	0	m
m00741[p]	3,5-dioxo-12(S)-hydroxy-eicosa-(8E,10E,14Z)-trienoyl-CoA	C41H64N7O20P3S	C41H64N7O20P3S	0	p
m00742[c]	3,7,24THCA	C27H46O5	C27H46O5	0	c
m00742[m]	3,7,24THCA	C27H46O5	C27H46O5	0	m
m00743[c]	3,7,24THCA-CoA	C48H80N7O20P3S	C48H80N7O20P3S	0	c
m00743[p]	3,7,24THCA-CoA	C48H80N7O20P3S	C48H80N7O20P3S	0	p
m00744[c]	3,8-LD1	C67H111N4O39R	C67H111N4O39R	0	c	G00064
m00744[g]	3,8-LD1	C67H111N4O39R	C67H111N4O39R	0	g	G00064
m00744[s]	3,8-LD1	C67H111N4O39R	C67H111N4O39R	0	s	G00064
m00745[c]	deoxycholic acid	C24H40O4	C24H40O4	0	c	C04483		CHEBI:28834
m00745[r]	deoxycholic acid	C24H40O4	C24H40O4	0	r	C04483		CHEBI:28834
m00745[s]	deoxycholic acid	C24H40O4	C24H40O4	0	s	C04483		CHEBI:28834
m00746[m]	3alpha,7alpha,12alpha,24(S)-tetrahydroxy-5beta-cholestan-27-al	C27H46O5	C27H46O5	0	m
m00747[r]	3alpha,7alpha,12alpha,25-tetrahydroxy-5beta-cholestane-24-one	C27H46O5	C27H46O5	0	r
m00748[m]	3alpha,7alpha,12alpha-trihydroxy-5beta-24-oxocholestanoyl-CoA	C48H78N7O21P3S	C48H78N7O21P3S	0	m	C05467		CHEBI:27379
m00748[p]	3alpha,7alpha,12alpha-trihydroxy-5beta-24-oxocholestanoyl-CoA	C48H78N7O21P3S	C48H78N7O21P3S	0	p	C05467		CHEBI:27379
m00749[m]	3alpha,7alpha,12alpha-trihydroxy-5beta-cholest-24-enoyl-CoA	C48H78N7O20P3S	C48H78N7O20P3S	0	m	C05460		CHEBI:52432;CHEBI:27505
m00749[p]	3alpha,7alpha,12alpha-trihydroxy-5beta-cholest-24-enoyl-CoA	C48H78N7O20P3S	C48H78N7O20P3S	0	p	C05460		CHEBI:52432;CHEBI:27505
m00750[c]	3alpha,7alpha,12alpha-trihydroxy-5beta-cholestan-26-al	C27H46O4	C27H46O4	0	c	C01301		CHEBI:48940
m00750[m]	3alpha,7alpha,12alpha-trihydroxy-5beta-cholestan-26-al	C27H46O4	C27H46O4	0	m	C01301		CHEBI:48940
m00751[m]	3alpha,7alpha,12alpha-trihydroxy-5beta-cholestan-27-al	C27H46O4	C27H46O4	0	m	C01301		CHEBI:48940
m00752[c]	3alpha,7alpha,12alpha-trihydroxy-5beta-cholestanate	C27H46O5	C27H46O5	0	c	C04722		CHEBI:48043;CHEBI:18402
m00752[m]	3alpha,7alpha,12alpha-trihydroxy-5beta-cholestanate	C27H46O5	C27H46O5	0	m	C04722		CHEBI:48043;CHEBI:18402
m00752[p]	3alpha,7alpha,12alpha-trihydroxy-5beta-cholestanate	C27H46O5	C27H46O5	0	p	C04722		CHEBI:48043;CHEBI:18402
m00752[r]	3alpha,7alpha,12alpha-trihydroxy-5beta-cholestanate	C27H46O5	C27H46O5	0	r	C04722		CHEBI:48043;CHEBI:18402
m00753[m]	3alpha,7alpha,24(S)-trihydroxy-5beta-cholestan-27-al	C27H46O4	C27H46O4	0	m
m00754[p]	3alpha,7alpha-dihydroxy-24-oxo-5beta-cholestanoyl coa	C48H78N7O20P3S	C48H78N7O20P3S	0	p	C05449		CHEBI:28533
m00755[p]	3alpha,7alpha-dihydroxy-5beta-cholest-24-enoyl-CoA	C48H78N7O19P3S	C48H78N7O19P3S	0	p	C05447		CHEBI:27393
m00756[c]	3alpha,7alpha-dihydroxy-5beta-cholestan-26-al	C27H46O3	C27H46O3	0	c	C05445		CHEBI:27428
m00756[m]	3alpha,7alpha-dihydroxy-5beta-cholestan-26-al	C27H46O3	C27H46O3	0	m	C05445		CHEBI:27428
m00757[m]	3alpha,7alpha-dihydroxy-5beta-cholestan-27-al	C27H46O3	C27H46O3	0	m
m00758[c]	3alpha,7alpha-dihydroxy-5beta-cholestanate	C27H46O4	C27H46O4	0	c	C04554		CHEBI:48467;CHEBI:16577
m00758[m]	3alpha,7alpha-dihydroxy-5beta-cholestanate	C27H46O4	C27H46O4	0	m	C04554		CHEBI:48467;CHEBI:16577
m00758[p]	3alpha,7alpha-dihydroxy-5beta-cholestanate	C27H46O4	C27H46O4	0	p	C04554		CHEBI:48467;CHEBI:16577
m00758[r]	3alpha,7alpha-dihydroxy-5beta-cholestanate	C27H46O4	C27H46O4	0	r	C04554		CHEBI:48467;CHEBI:16577
m00759[c]	3alpha-hydroxy-5alpha-pregnan-20-one	C21H34O2	C21H34O2	0	c	C13712
m00760[c]	3-amino-propanal	C3H7NO	C3H7NO	0	c	C05665		CHEBI:58374
m00761[m]	3beta,7alpha-dihydroxy-5-cholestenoate	C27H44O4	C27H44O4	0	m	C15610
m00762[g]	3-beta-D-glucuronosyl-3-beta-D-galactosyl-4-beta-D-galactosyl-O-beta-D-xylosylprotein	C27H42N2O23R2	C27H42N2O23R2	0	g	C04903
m00763[m]	3beta-hydroxy-5-cholestenal	C27H44O2	C27H44O2	0	m
m00764[m]	3beta-hydroxy-5-cholestene-27-oate	C27H44O3	C27H44O3	0	m
m00765[m]	3-carboxy-1-hydroxypropyl-ThPP	C16H25N4O10P2S	C16H25N4O10P2S	0	m	C05381		CHEBI:1463
m00766[c]	3-carboxy-alpha-chromanol	C16H22O4	C16H22O4	0	c
m00766[m]	3-carboxy-alpha-chromanol	C16H22O4	C16H22O4	0	m
m00767[m]	3-decaprenyl-4-hydroxybenzoate	C57H86O3	C57H86O3	0	m
m00768[c]	3-dehydro-L-gulonate	C6H10O7	C6H10O7	0	c	C00618		CHEBI:16142
m00769[c]	3-dehydrosphinganine	C18H37NO2	C18H37NO2	0	c	C02934		CHEBI:17862
m00770[m]	3-demethylubiquinol-10	C58H92O4	C58H92O4	0	m
m00771[c]	3-deoxy-D-glycero-D-galacto-2-nonulosonic acid	C9H16O9	C9H16O9	0	c
m00771[s]	3-deoxy-D-glycero-D-galacto-2-nonulosonic acid	C9H16O9	C9H16O9	0	s
m00772[c]	3-deoxy-D-glycero-D-galacto-2-nonulosonic acid-9-phosphate	C9H17O12P	C9H17O12P	0	c
m00773[m]	3-hydroxy-2,6-dimethyl-5-methylene-heptanoyl-CoA	C31H52N7O18P3S	C31H52N7O18P3S	0	m	C11947
m00773[p]	3-hydroxy-2,6-dimethyl-5-methylene-heptanoyl-CoA	C31H52N7O18P3S	C31H52N7O18P3S	0	p	C11947
m00774[c]	3-hydroxyacyl group of bacterial toxin	C52H91N2O23P2R5	C52H91N2O23P2R5	0	c	C11548
m00775[c]	3-hydroxyanthranilate	C7H7NO3	C7H7NO3	0	c	C00632		CHEBI:15793
m00776[c]	3-hydroxydocosanoyl-CoA	C43H78N7O18P3S	C43H78N7O18P3S	0	c
m00776[m]	3-hydroxydocosanoyl-CoA	C43H78N7O18P3S	C43H78N7O18P3S	0	m
m00776[p]	3-hydroxydocosanoyl-CoA	C43H78N7O18P3S	C43H78N7O18P3S	0	p
m00777[c]	3-hydroxyeicosanoyl-CoA	C41H74N7O18P3S	C41H74N7O18P3S	0	c
m00777[m]	3-hydroxyeicosanoyl-CoA	C41H74N7O18P3S	C41H74N7O18P3S	0	m
m00777[p]	3-hydroxyeicosanoyl-CoA	C41H74N7O18P3S	C41H74N7O18P3S	0	p
m00778[c]	3-hydroxyheneicosanoyl-CoA	C42H76N7O18P3S	C42H76N7O18P3S	0	c
m00778[m]	3-hydroxyheneicosanoyl-CoA	C42H76N7O18P3S	C42H76N7O18P3S	0	m
m00779[c]	3-hydroxyheptadecanoyl-[ACP]	C17H33O2SR	C17H33O2SR	0	c
m00780[m]	3-hydroxyheptadecanoyl-CoA	C38H68N7O18P3S	C38H68N7O18P3S	0	m
m00781[c]	3-hydroxyheptanoyl-[ACP]	C7H13O2SR	C7H13O2SR	0	c
m00782[m]	3-hydroxyheptanoyl-CoA	C28H48N7O18P3S	C28H48N7O18P3S	0	m
m00783[c]	3-hydroxyhexacosanoyl-CoA	C47H86N7O18P3S	C47H86N7O18P3S	0	c
m00783[p]	3-hydroxyhexacosanoyl-CoA	C47H86N7O18P3S	C47H86N7O18P3S	0	p
m00784[m]	3-hydroxyisobutyrate	C4H8O3	C4H8O3	0	m	C01188		CHEBI:11805
m00785[m]	3-hydroxyisobutyryl-CoA	C25H42N7O18P3S	C25H42N7O18P3S	0	m	C04047		CHEBI:15481
m00786[c]	3-hydroxykynurenamine	C9H12N2O2	C9H12N2O2	0	c	C05636
m00787[c]	3-hydroxykynurenine-O-beta-D-glucoside	C16H22N2O9	C16H22N2O9	0	c
m00788[c]	3-hydroxy-L-kynurenine	C10H12N2O4	C10H12N2O4	0	c	C03227		CHEBI:17380
m00789[c]	3-hydroxy-N6,N6,N6-trimethyl-L-lysine	C9H20N2O3	C9H20N2O3	0	c	C01259		CHEBI:57515
m00790[c]	3-hydroxynonadecanoyl-CoA	C40H72N7O18P3S	C40H72N7O18P3S	0	c
m00790[m]	3-hydroxynonadecanoyl-CoA	C40H72N7O18P3S	C40H72N7O18P3S	0	m
m00791[c]	3-hydroxynonanoyl-[ACP]	C9H17O2SR	C9H17O2SR	0	c
m00792[m]	3-hydroxynonanoyl-CoA	C30H52N7O18P3S	C30H52N7O18P3S	0	m
m00793[c]	3-hydroxyoctadecanoyl-CoA	C39H70N7O18P3S	C39H70N7O18P3S	0	c	C16217
m00793[m]	3-hydroxyoctadecanoyl-CoA	C39H70N7O18P3S	C39H70N7O18P3S	0	m	C16217
m00793[p]	3-hydroxyoctadecanoyl-CoA	C39H70N7O18P3S	C39H70N7O18P3S	0	p	C16217
m00794[c]	3-hydroxypentadecanoyl-[ACP]	C15H29O2SR	C15H29O2SR	0	c
m00795[m]	3-hydroxypentadecanoyl-CoA	C36H64N7O18P3S	C36H64N7O18P3S	0	m
m00796[c]	3-hydroxypentanoyl-[ACP]	C5H9O2SR	C5H9O2SR	0	c
m00797[m]	3-hydroxypentanoyl-CoA	C26H44N7O18P3S	C26H44N7O18P3S	0	m
m00798[p]	3-hydroxypristanoyl-CoA	C40H72N7O18P3S	C40H72N7O18P3S	0	p
m00799[m]	3-hydroxypropionyl-CoA	C24H40N7O18P3S	C24H40N7O18P3S	0	m	C05668		CHEBI:27762
m00800[c]	3-hydroxytetracosanoyl-CoA	C45H82N7O18P3S	C45H82N7O18P3S	0	c
m00800[p]	3-hydroxytetracosanoyl-CoA	C45H82N7O18P3S	C45H82N7O18P3S	0	p
m00801[p]	3-hydroxy-THA-CoA	C45H70N7O18P3S	C45H70N7O18P3S	0	p
m00802[c]	3-hydroxytricosanoyl-CoA	C44H80N7O18P3S	C44H80N7O18P3S	0	c
m00803[c]	3-hydroxytridecanoyl-[ACP]	C13H25O2SR	C13H25O2SR	0	c
m00804[m]	3-hydroxytridecanoyl-CoA	C34H60N7O18P3S	C34H60N7O18P3S	0	m
m00805[c]	3-hydroxyundecanoyl-[ACP]	C11H21O2SR	C11H21O2SR	0	c
m00806[m]	3-hydroxyundecanoyl-CoA	C32H56N7O18P3S	C32H56N7O18P3S	0	m
m00807[c]	3-iodo-L-tyrosine	C9H10INO3	C9H10INO3	0	c	C02515		CHEBI:27847
m00808[c]	3-isoLM1	(Gal)2(Glc)1(GlcNAc)1(Neu5Ac)1(Cer)1	(Gal)2(Glc)1(GlcNAc)1(Neu5Ac)1(Cer)1	0	c	G00047
m00809[c]	3-keto-4-methylzymosterol	C28H44O	C28H44O	0	c	C15816		CHEBI:50593
m00810[s]	3-keto-beta-D-galactose	C6H10O6	C6H10O6	0	s	C05394		CHEBI:27453
m00811[c]	3-keto-eicosa-8,11,14,17-all-cis-tetraenoyl-CoA	C41H64N7O18P3S	C41H64N7O18P3S	0	c
m00812[s]	3-ketolactose	C12H20O11	C12H20O11	0	s	C05403
m00813[p]	3-ketopristanoyl-CoA	C40H70N7O18P3S	C40H70N7O18P3S	0	p	C07297		CHEBI:15371
m00814[p]	3-keto-THA-CoA	C45H68N7O18P3S	C45H68N7O18P3S	0	p	C16376
m00815[c]	3-mercaptolactate	C3H6O3S	C3H6O3S	0	c	C05823		CHEBI:28580
m00816[c]	3-mercaptolactate-cysteine-disulfide	C6H11NO5S2	C6H11NO5S2	0	c
m00816[s]	3-mercaptolactate-cysteine-disulfide	C6H11NO5S2	C6H11NO5S2	0	s
m00817[m]	3-methoxy-4-hydroxy-5-all-trans-decaprenylbenzoate	C58H88O4	C58H88O4	0	m
m00818[c]	3-methoxy-4-hydroxyphenylacetaldehyde	C9H10O3	C9H10O3	0	c	C05581		CHEBI:28111
m00819[c]	3-methoxy-4-hydroxyphenylethyleneglycol	C9H12O4	C9H12O4	0	c	C05594
m00820[c]	3-methoxy-4-hydroxyphenylglycolaldehyde	C9H10O4	C9H10O4	0	c	C05583
m00821[c]	3-methoxytyramine	C9H13NO2	C9H13NO2	0	c	C05587
m00822[c]	3-methyl-2-oxobutanoate-dehydrogenase	C4H6N2O3R2	C4H6N2O3R2	0	c	C04726
m00823[c]	3-methyl-2-oxobutanoate-dehydrogenase-phosphate	C4H7N2O6PR2	C4H7N2O6PR2	0	c	C01308
m00824[c]	3-methyl-2-oxobutyrate	C5H8O3	C5H8O3	0	c	C00141		CHEBI:11851
m00824[m]	3-methyl-2-oxobutyrate	C5H8O3	C5H8O3	0	m	C00141		CHEBI:11851
m00825[m]	3-methylcrotonoylglycine	C7H11NO3	C7H11NO3	0	m
m00826[m]	3-methylcrotonyl-CoA	C26H42N7O17P3S	C26H42N7O17P3S	0	m	C03069		CHEBI:15486
m00827[m]	3-methylglutaconyl-CoA	C27H42N7O19P3S	C27H42N7O19P3S	0	m	C03231		CHEBI:15488
m00828[c]	3-monoiodo-L-thyronine	C15H14INO4	C15H14INO4	0	c
m00828[r]	3-monoiodo-L-thyronine	C15H14INO4	C15H14INO4	0	r
m00829[c]	3-monoiodo-L-thyronine-4-O-sulfate	C15H14INO7S	C15H14INO7S	0	c
m00830[c]	3-O-methyldopa	C10H13NO4	C10H13NO4	0	c
m00831[m]	3-oxo-(2S)-methylisocapryloyl-CoA	C30H50N7O18P3S	C30H50N7O18P3S	0	m
m00832[p]	3-oxo-(2S,6R,10R)-trimethyl-hendecanoyl-CoA	C35H60N7O18P3S	C35H60N7O18P3S	0	p
m00833[p]	3-oxo-(4R,8R,12R)-trimethyl-tridecanoyl-CoA	C37H64N7O18P3S	C37H64N7O18P3S	0	p
m00834[m]	3-oxo-(6Z,9Z,12Z)-octadecatrienoyl-CoA	C39H62N7O18P3S	C39H62N7O18P3S	0	m
m00834[p]	3-oxo-(6Z,9Z,12Z)-octadecatrienoyl-CoA	C39H62N7O18P3S	C39H62N7O18P3S	0	p
m00835[c]	3-oxo-10(R)-hydroxy-octadeca-(6E,8E,12Z)-trienoate	C18H28O4	C18H28O4	0	c
m00835[m]	3-oxo-10(R)-hydroxy-octadeca-(6E,8E,12Z)-trienoate	C18H28O4	C18H28O4	0	m
m00835[p]	3-oxo-10(R)-hydroxy-octadeca-(6E,8E,12Z)-trienoate	C18H28O4	C18H28O4	0	p
m00836[m]	3-oxo-10(R)-hydroxy-octadeca-(6E,8E,12Z)-trienoyl-CoA	C39H62N7O19P3S	C39H62N7O19P3S	0	m
m00836[p]	3-oxo-10(R)-hydroxy-octadeca-(6E,8E,12Z)-trienoyl-CoA	C39H62N7O19P3S	C39H62N7O19P3S	0	p
m00837[c]	3-oxo-10(S)-hydroxy-octadeca-(6E,8E,12Z)-trienoate	C18H28O4	C18H28O4	0	c
m00837[m]	3-oxo-10(S)-hydroxy-octadeca-(6E,8E,12Z)-trienoate	C18H28O4	C18H28O4	0	m
m00837[p]	3-oxo-10(S)-hydroxy-octadeca-(6E,8E,12Z)-trienoate	C18H28O4	C18H28O4	0	p
m00838[m]	3-oxo-10(S)-hydroxy-octadeca-(6E,8E,12Z)-trienoyl-CoA	C39H62N7O19P3S	C39H62N7O19P3S	0	m
m00838[p]	3-oxo-10(S)-hydroxy-octadeca-(6E,8E,12Z)-trienoyl-CoA	C39H62N7O19P3S	C39H62N7O19P3S	0	p
m00839[c]	3-oxo-11cis-docosenoyl-CoA	C43H74N7O18P3S	C43H74N7O18P3S	0	c
m00840[c]	3-oxo-11-cis-eicosenoyl-CoA	C41H70N7O18P3S	C41H70N7O18P3S	0	c
m00840[m]	3-oxo-11-cis-eicosenoyl-CoA	C41H70N7O18P3S	C41H70N7O18P3S	0	m
m00840[p]	3-oxo-11-cis-eicosenoyl-CoA	C41H70N7O18P3S	C41H70N7O18P3S	0	p
m00841[m]	3-oxo-11-cis-octadecenoyl-CoA	C39H66N7O18P3S	C39H66N7O18P3S	0	m
m00841[p]	3-oxo-11-cis-octadecenoyl-CoA	C39H66N7O18P3S	C39H66N7O18P3S	0	p
m00842[c]	3-oxo-13cis-docosenoyl-CoA	C43H74N7O18P3S	C43H74N7O18P3S	0	c
m00842[m]	3-oxo-13cis-docosenoyl-CoA	C43H74N7O18P3S	C43H74N7O18P3S	0	m
m00842[p]	3-oxo-13cis-docosenoyl-CoA	C43H74N7O18P3S	C43H74N7O18P3S	0	p
m00843[c]	3-oxo-13-cis-eicosenoyl-CoA	C41H70N7O18P3S	C41H70N7O18P3S	0	c
m00843[m]	3-oxo-13-cis-eicosenoyl-CoA	C41H70N7O18P3S	C41H70N7O18P3S	0	m
m00843[p]	3-oxo-13-cis-eicosenoyl-CoA	C41H70N7O18P3S	C41H70N7O18P3S	0	p
m00844[m]	3-oxo-4(R),8-dimethyl-nonanoyl-CoA	C32H54N7O18P3S	C32H54N7O18P3S	0	m
m00845[m]	3-oxo-4-methyl-pentanoyl-CoA	C27H44N7O18P3S	C27H44N7O18P3S	0	m
m00846[m]	3-oxo-5(S),12(R)-dihydroxy-eicosa-8-trans-6,14-cis-trienoyl-CoA	C41H66N7O20P3S	C41H66N7O20P3S	0	m
m00846[p]	3-oxo-5(S),12(R)-dihydroxy-eicosa-8-trans-6,14-cis-trienoyl-CoA	C41H66N7O20P3S	C41H66N7O20P3S	0	p
m00847[m]	3-oxo-6(R)-hydroxy-tetradec-8-cis-enoate	C14H24O4	C14H24O4	0	m
m00848[m]	3-oxo-6(S)-hydroxy-tetradec-(8Z)-enoate	C14H24O4	C14H24O4	0	m
m00849[m]	3-oxo-7-hexadecenoyl-CoA	C37H62N7O18P3S	C37H62N7O18P3S	0	m
m00849[p]	3-oxo-7-hexadecenoyl-CoA	C37H62N7O18P3S	C37H62N7O18P3S	0	p
m00850[m]	3-oxo-8(R)-hydroxy-hexadeca-(6E,10Z)-dienoate	C16H26O4	C16H26O4	0	m
m00851[m]	3-oxo-8(S)-hydroxy-hexadeca-(6E,10Z)-dienoate	C16H26O4	C16H26O4	0	m
m00852[c]	3-oxo-9-cis-eicosenoyl-CoA	C41H70N7O18P3S	C41H70N7O18P3S	0	c
m00853[p]	3-oxo-all-cis-6,9,12,15,18-tetracosapentaenoyl-CoA	C45H70N7O18P3S	C45H70N7O18P3S	0	p	C16389
m00854[m]	3-oxo-cis,cis-5,8-tetradecadienoyl-CoA	C35H56N7O18P3S	C35H56N7O18P3S	0	m
m00854[p]	3-oxo-cis,cis-5,8-tetradecadienoyl-CoA	C35H56N7O18P3S	C35H56N7O18P3S	0	p
m00855[m]	3-oxo-cis,cis-7,10-hexadecadienoyl-CoA	C37H60N7O18P3S	C37H60N7O18P3S	0	m
m00855[p]	3-oxo-cis,cis-7,10-hexadecadienoyl-CoA	C37H60N7O18P3S	C37H60N7O18P3S	0	p
m00856[c]	3-oxo-cis-15-tetracosaenoyl-CoA	C45H78N7O18P3S	C45H78N7O18P3S	0	c
m00856[p]	3-oxo-cis-15-tetracosaenoyl-CoA	C45H78N7O18P3S	C45H78N7O18P3S	0	p
m00857[c]	3-oxodecanoyl-[ACP]	C10H17O2SR	C10H17O2SR	0	c	C05753
m00858[m]	3-oxodecanoyl-CoA	C31H52N7O18P3S	C31H52N7O18P3S	0	m	C05265		CHEBI:28528
m00858[p]	3-oxodecanoyl-CoA	C31H52N7O18P3S	C31H52N7O18P3S	0	p	C05265		CHEBI:28528
m00859[c]	3-oxo-dihomo-gamma-linolenoyl-CoA	C41H66N7O18P3S	C41H66N7O18P3S	0	c
m00859[m]	3-oxo-dihomo-gamma-linolenoyl-CoA	C41H66N7O18P3S	C41H66N7O18P3S	0	m
m00859[p]	3-oxo-dihomo-gamma-linolenoyl-CoA	C41H66N7O18P3S	C41H66N7O18P3S	0	p
m00860[c]	3-oxodocasa-cis,cis-13,16-dienoyl-CoA	C43H72N7O18P3S	C43H72N7O18P3S	0	c
m00861[c]	3-oxo-docosa-10,13,16,19-all-cis-tetraenoyl-CoA	C43H68N7O18P3S	C43H68N7O18P3S	0	c
m00862[c]	3-oxo-docosa-13,16,19-all-cis-trienoyl-CoA	C43H70N7O18P3S	C43H70N7O18P3S	0	c
m00863[c]	3-oxo-docosa-7,10,13,16,19-all-cis-pentaenoyl-CoA	C43H66N7O18P3S	C43H66N7O18P3S	0	c
m00864[c]	3-oxo-docosa-7,10,13,16-all-cis-tetraenoyl-CoA	C43H68N7O18P3S	C43H68N7O18P3S	0	c
m00865[c]	3-oxo-docosa-cis,cis,cis-10,13,16-trienoyl-CoA	C43H70N7O18P3S	C43H70N7O18P3S	0	c
m00866[c]	3-oxodocosanoyl-CoA	C43H76N7O18P3S	C43H76N7O18P3S	0	c
m00866[m]	3-oxodocosanoyl-CoA	C43H76N7O18P3S	C43H76N7O18P3S	0	m
m00866[p]	3-oxodocosanoyl-CoA	C43H76N7O18P3S	C43H76N7O18P3S	0	p
m00867[c]	3-oxododecanoyl-[ACP]	C12H21O2SR	C12H21O2SR	0	c	C05756
m00868[m]	3-oxododecanoyl-CoA	C33H56N7O18P3S	C33H56N7O18P3S	0	m	C05263		CHEBI:27868
m00868[p]	3-oxododecanoyl-CoA	C33H56N7O18P3S	C33H56N7O18P3S	0	p	C05263		CHEBI:27868
m00869[c]	3-oxoeicosa-cis,cis,cis-11,14,17-trienoyl-CoA	C41H66N7O18P3S	C41H66N7O18P3S	0	c
m00870[c]	3-oxoeicosa-cis,cis-11,14-dienoyl-CoA	C41H68N7O18P3S	C41H68N7O18P3S	0	c
m00871[c]	3-oxo-eicosadienoyl-CoA	C41H68N7O18P3S	C41H68N7O18P3S	0	c
m00872[c]	3-oxoeicosanoyl-CoA	C41H72N7O18P3S	C41H72N7O18P3S	0	c
m00872[m]	3-oxoeicosanoyl-CoA	C41H72N7O18P3S	C41H72N7O18P3S	0	m
m00872[p]	3-oxoeicosanoyl-CoA	C41H72N7O18P3S	C41H72N7O18P3S	0	p
m00873[c]	3-oxoheneicosanoyl-CoA	C42H74N7O18P3S	C42H74N7O18P3S	0	c
m00873[m]	3-oxoheneicosanoyl-CoA	C42H74N7O18P3S	C42H74N7O18P3S	0	m
m00874[c]	3-oxoheptadecanoyl-[ACP]	C17H31O2SR	C17H31O2SR	0	c
m00875[m]	3-oxoheptadecanoyl-CoA	C38H66N7O18P3S	C38H66N7O18P3S	0	m
m00876[c]	3-oxoheptanoyl-[ACP]	C7H11O2SR	C7H11O2SR	0	c
m00877[m]	3-oxoheptanoyl-CoA	C28H46N7O18P3S	C28H46N7O18P3S	0	m
m00878[c]	3-oxohexacosanoyl-CoA	C47H84N7O18P3S	C47H84N7O18P3S	0	c
m00878[p]	3-oxohexacosanoyl-CoA	C47H84N7O18P3S	C47H84N7O18P3S	0	p
m00879[c]	3-oxo-hexacosenoyl-CoA	C47H82N7O18P3S	C47H82N7O18P3S	0	c
m00879[p]	3-oxo-hexacosenoyl-CoA	C47H82N7O18P3S	C47H82N7O18P3S	0	p
m00880[c]	3-oxohexadecanoyl-[ACP]	C16H29O2SR	C16H29O2SR	0	c	C05762
m00881[c]	3-oxohexanoyl-[ACP]	C6H9O2SR	C6H9O2SR	0	c	C05746
m00882[m]	3-oxohexanoyl-CoA	C27H44N7O18P3S	C27H44N7O18P3S	0	m	C05269		CHEBI:27648
m00882[p]	3-oxohexanoyl-CoA	C27H44N7O18P3S	C27H44N7O18P3S	0	p	C05269		CHEBI:27648
m00883[m]	3-oxolaur-6-cis-enoyl-CoA	C33H54N7O18P3S	C33H54N7O18P3S	0	m
m00883[p]	3-oxolaur-6-cis-enoyl-CoA	C33H54N7O18P3S	C33H54N7O18P3S	0	p
m00884[m]	3-oxolinoleoyl-CoA	C39H64N7O18P3S	C39H64N7O18P3S	0	m
m00884[p]	3-oxolinoleoyl-CoA	C39H64N7O18P3S	C39H64N7O18P3S	0	p
m00885[m]	3-oxomyrist-5-enoyl-CoA	C35H58N7O18P3S	C35H58N7O18P3S	0	m
m00885[p]	3-oxomyrist-5-enoyl-CoA	C35H58N7O18P3S	C35H58N7O18P3S	0	p
m00886[m]	3-oxomyrist-7-enoyl-CoA	C35H58N7O18P3S	C35H58N7O18P3S	0	m
m00886[p]	3-oxomyrist-7-enoyl-CoA	C35H58N7O18P3S	C35H58N7O18P3S	0	p
m00887[c]	3-oxononadecanoyl-CoA	C40H70N7O18P3S	C40H70N7O18P3S	0	c
m00887[m]	3-oxononadecanoyl-CoA	C40H70N7O18P3S	C40H70N7O18P3S	0	m
m00888[c]	3-oxononanoyl-[ACP]	C9H15O2SR	C9H15O2SR	0	c
m00889[m]	3-oxononanoyl-CoA	C30H50N7O18P3S	C30H50N7O18P3S	0	m
m00890[c]	3-oxooctadecanoyl-CoA	C39H68N7O18P3S	C39H68N7O18P3S	0	c	C16216		CHEBI:50571
m00890[m]	3-oxooctadecanoyl-CoA	C39H68N7O18P3S	C39H68N7O18P3S	0	m	C16216		CHEBI:50571
m00890[p]	3-oxooctadecanoyl-CoA	C39H68N7O18P3S	C39H68N7O18P3S	0	p	C16216		CHEBI:50571
m00891[c]	3-oxooctanoyl-[ACP]	C8H13O2SR	C8H13O2SR	0	c	C05750
m00892[m]	3-oxooctanoyl-CoA	C29H48N7O18P3S	C29H48N7O18P3S	0	m	C05267		CHEBI:28264
m00892[p]	3-oxooctanoyl-CoA	C29H48N7O18P3S	C29H48N7O18P3S	0	p	C05267		CHEBI:28264
m00893[m]	3-oxooleoyl-CoA	C39H66N7O18P3S	C39H66N7O18P3S	0	m
m00893[p]	3-oxooleoyl-CoA	C39H66N7O18P3S	C39H66N7O18P3S	0	p
m00894[m]	3-oxopalmitoleoyl-CoA	C37H62N7O18P3S	C37H62N7O18P3S	0	m
m00894[p]	3-oxopalmitoleoyl-CoA	C37H62N7O18P3S	C37H62N7O18P3S	0	p
m00895[m]	3-oxopalmitoyl-CoA	C37H64N7O18P3S	C37H64N7O18P3S	0	m	C05259		CHEBI:15491
m00895[p]	3-oxopalmitoyl-CoA	C37H64N7O18P3S	C37H64N7O18P3S	0	p	C05259		CHEBI:15491
m00896[c]	3-oxopentadecanoyl-[ACP]	C15H27O2SR	C15H27O2SR	0	c
m00897[m]	3-oxopentadecanoyl-CoA	C36H62N7O18P3S	C36H62N7O18P3S	0	m
m00898[c]	3-oxopentanoyl-[ACP]	C5H7O2SR	C5H7O2SR	0	c
m00899[m]	3-oxopentanoyl-CoA	C26H42N7O18P3S	C26H42N7O18P3S	0	m	C03344
m00900[m]	3-oxopropanoate	C3H4O3	C3H4O3	0	m	C00222		CHEBI:17960
m00901[c]	3-oxo-tetracosa-12,15,18,21-all-cis-tetraenoyl-CoA	C45H72N7O18P3S	C45H72N7O18P3S	0	c
m00902[c]	3-oxo-tetracosa-9,12,15,18,21-all-cis-pentaenoyl-CoA	C45H70N7O18P3S	C45H70N7O18P3S	0	c
m00903[c]	3-oxo-tetracosa-9,12,15,18-all-cis-tetraenoyl-CoA	C45H72N7O18P3S	C45H72N7O18P3S	0	c
m00904[c]	3-oxotetracosanoyl-CoA	C45H80N7O18P3S	C45H80N7O18P3S	0	c
m00904[p]	3-oxotetracosanoyl-CoA	C45H80N7O18P3S	C45H80N7O18P3S	0	p
m00905[c]	3-oxotetradecanoyl-[ACP]	C14H25O2SR	C14H25O2SR	0	c	C05759
m00906[m]	3-oxotetradecanoyl-CoA	C35H60N7O18P3S	C35H60N7O18P3S	0	m	C05261		CHEBI:28726
m00906[p]	3-oxotetradecanoyl-CoA	C35H60N7O18P3S	C35H60N7O18P3S	0	p	C05261		CHEBI:28726
m00907[c]	3-oxotricosanoyl-CoA	C44H78N7O18P3S	C44H78N7O18P3S	0	c
m00908[c]	3-oxotridecanoyl-[ACP]	C13H23O2SR	C13H23O2SR	0	c
m00909[m]	3-oxotridecanoyl-CoA	C34H58N7O18P3S	C34H58N7O18P3S	0	m
m00910[c]	3-oxoundecanoyl-[ACP]	C11H19O2SR	C11H19O2SR	0	c
m00911[m]	3-oxoundecanoyl-CoA	C32H54N7O18P3S	C32H54N7O18P3S	0	m
m00912[c]	3-phosphoadenylylselenate	C10H15N5O13P2Se	C10H15N5O13P2Se	0	c	C05696
m00913[c]	3-phospho-D-glycerate	C3H7O7P	C3H7O7P	0	c	C00197		CHEBI:17794
m00913[m]	3-phospho-D-glycerate	C3H7O7P	C3H7O7P	0	m	C00197		CHEBI:17794
m00914[c]	3-phosphonooxypyruvate	C3H5O7P	C3H5O7P	0	c	C03232		CHEBI:30933
m00915[c]	3-phosphopolynucleotide	C10H18O13P2R2(C5H8O6PR)n	C10H18O13P2R2(C5H8O6PR)n	0	c	C03463		CHEBI:1359
m00916[c]	3-phosphoserine	C3H8NO6P	C3H8NO6P	0	c	C01005		CHEBI:15811
m00917[c]	3-succinoylpyridine	C9H9NO3	C9H9NO3	0	c	C19569
m00918[c]	3-sulfinoalanine	C3H7NO4S	C3H7NO4S	0	c	C00606		CHEBI:16345
m00918[m]	3-sulfinoalanine	C3H7NO4S	C3H7NO4S	0	m	C00606		CHEBI:16345
m00919[c]	3-sulfinylpyruvic acid	C3H4O5S	C3H4O5S	0	c	C05527
m00919[m]	3-sulfinylpyruvic acid	C3H4O5S	C3H4O5S	0	m	C05527
m00920[c]	3-sulfopyruvate	C3H4O6S	C3H4O6S	0	c	C05528		CHEBI:16894
m00920[m]	3-sulfopyruvate	C3H4O6S	C3H4O6S	0	m	C05528		CHEBI:16894
m00921[c]	3-UMP	C9H13N2O9P	C9H13N2O9P	0	c	C01368		CHEBI:28895
m00922[c]	3-ureidoisobutyrate	C5H10N2O3	C5H10N2O3	0	c	C05100		CHEBI:1670
m00923[c]	3-ureidopropionate	C4H8N2O3	C4H8N2O3	0	c	C02642		CHEBI:18261
m00924[c]	4-(2-amino-3-hydroxyphenyl)-2,4-dioxobutanoate	C10H9NO5	C10H9NO5	0	c	C05645
m00925[c]	4-(2-amino-3-hydroxyphenyl)-4-oxobutanoic acid-O-glucoside	C16H21NO9	C16H21NO9	0	c
m00926[c]	4-(2-aminophenyl)-2,4-dioxobutanoate	C10H9NO4	C10H9NO4	0	c	C01252		CHEBI:17442
m00927[c]	4-(methylnitrosamino)-1-(1-oxido-3-pyridinyl)-1-butanone	C10H13N3O3	C10H13N3O3	0	c	C19602
m00928[c]	4-(methylnitrosamino)-1-(3-pyridyl)-1-butanol glucuronide	C16H23N3O8	C16H23N3O8	0	c	C19605
m00929[c]	4-(methylnitrosamino)-1-(3-pyridyl)-1-butanol	C10H15N3O2	C10H15N3O2	0	c	C19574
m00930[c]	4-(methylnitrosamino)-1-(3-pyridyl-N-oxide)-1-butanol	C10H15N3O3	C10H15N3O3	0	c	C19603
m00931[c]	4-(nitrosoamino)-1-(3-pyridinyl)-1-butanone	C9H11N3O2	C9H11N3O2	0	c	C19564
m00932[c]	4-(n-nitrosomethylamino)-1-(3-pyridyl)-1-butanone	C10H13N3O2	C10H13N3O2	0	c	C16453
m00932[s]	4-(n-nitrosomethylamino)-1-(3-pyridyl)-1-butanone	C10H13N3O2	C10H13N3O2	0	s	C16453
m00933[c]	4(R),8-dimethyl-nonanoyl-CoA	C32H56N7O17P3S	C32H56N7O17P3S	0	c
m00933[m]	4(R),8-dimethyl-nonanoyl-CoA	C32H56N7O17P3S	C32H56N7O17P3S	0	m
m00933[p]	4(R),8-dimethyl-nonanoyl-CoA	C32H56N7O17P3S	C32H56N7O17P3S	0	p
m00934[m]	4(R),8-dimethyl-trans-2-nonenoyl-CoA	C32H54N7O17P3S	C32H54N7O17P3S	0	m
m00935[m]	4(R)-hydroxy-dodec-(6Z)-enoate	C12H22O3	C12H22O3	0	m
m00936[m]	4(S)-hydroxy-dodec-(6Z)-enoate	C12H22O3	C12H22O3	0	m
m00937[c]	4,4-dimethyl-14alpha-formyl-5alpha-cholesta-8,24-dien-3beta-ol	C30H48O2	C30H48O2	0	c	C11455
m00938[c]	4,4-dimethyl-14alpha-formyl-5alpha-cholesta-8-en-3beta-ol	C30H50O2	C30H50O2	0	c
m00939[c]	4,4-dimethyl-14alpha-hydroxymethyl-5alpha-cholesta-8,24-dien-3beta-ol	C30H50O2	C30H50O2	0	c
m00940[c]	4,4-dimethyl-14alpha-hydroxymethyl-5alpha-cholesta-8-en-3beta-ol	C30H52O2	C30H52O2	0	c
m00941[c]	4,4-dimethyl-5alpha-cholesta-8,14,24-trien-3beta-ol	C29H46O	C29H46O	0	c	C11455		CHEBI:17813
m00942[c]	4,4-dimethyl-5alpha-cholesta-8,14-dien-3-beta-ol	C29H48O	C29H48O	0	c
m00943[c]	4,4-dimethyl-5alpha-cholesta-8-en-3-beta-ol	C29H50O	C29H50O	0	c	C15915
m00944[c]	4,5-dihydro-4-hydroxy-5-S-glutathionyl-benzo[a]pyrene	C30H29N3O7S	C30H29N3O7S	0	c	C14855
m00945[c]	4,6,7-trihydroxy-1,2,3,4-tetrahydroisoquinoline	C9H11NO3	C9H11NO3	0	c
m00946[c]	4,6-dideoxy-4-oxo-dTDP-D-glucose	C16H24N2O15P2	C16H24N2O15P2	0	c	C11907		CHEBI:57649
m00947[c]	4,6-dihydroxyquinoline	C9H7NO2	C9H7NO2	0	c	C05639		CHEBI:28799
m00948[p]	4,8,12-trimethyltridecanoyl-CoA	C37H66N7O17P3S	C37H66N7O17P3S	0	p	C07296		CHEBI:15495
m00949[c]	4,8-dihydroxyquinoline	C9H7NO2	C9H7NO2	0	c	C05637		CHEBI:28883
m00950[c]	4,8-dimethylnonanoylcarnitine	C18H35NO4	C18H35NO4	0	c
m00950[m]	4,8-dimethylnonanoylcarnitine	C18H35NO4	C18H35NO4	0	m
m00951[c]	4-[(hydroxymethyl)nitrosoamino]-1-(3-pyridinyl)-1-butanone	C10H13N3O3	C10H13N3O3	0	c	C19563
m00952[c]	4-acetamidobutanoate	C6H11NO3	C6H11NO3	0	c	C02946		CHEBI:17645
m00953[c]	4alpha-carboxy-4beta-methyl-5alpha-cholesta-8,24-dien-3beta-ol	C29H46O3	C29H46O3	0	c	C15808
m00954[c]	4alpha-carboxy-4beta-methyl-5alpha-cholesta-8-en-3beta-ol	C29H48O3	C29H48O3	0	c
m00955[c]	4alpha-carboxy-5alpha-cholesta-8,24-dien-3beta-ol	C28H44O3	C28H44O3	0	c
m00956[c]	4alpha-carboxy-5alpha-cholesta-8-en-3beta-ol	C28H46O3	C28H46O3	0	c
m00957[c]	4alpha-formyl-4beta-methyl-5alpha-cholesta-8,24-dien-3beta-ol	C29H46O2	C29H46O2	0	c
m00958[c]	4alpha-formyl-4beta-methyl-5alpha-cholesta-8-en-3beta-ol	C29H48O2	C29H48O2	0	c
m00959[c]	4alpha-formyl-5alpha-cholesta-8,24-dien-3beta-ol	C28H44O2	C28H44O2	0	c
m00960[c]	4alpha-formyl-5alpha-cholesta-8-en-3beta-ol	C28H46O2	C28H46O2	0	c
m00961[c]	4alpha-hydroxymethyl-4beta-methyl-5alpha-cholesta-8,24-dien-3beta-ol	C29H48O2	C29H48O2	0	c	C15808
m00962[c]	4alpha-hydroxymethyl-4beta-methyl-5alpha-cholesta-8-en-3beta-ol	C29H50O2	C29H50O2	0	c
m00963[c]	4alpha-hydroxymethyl-5alpha-cholesta-8,24-dien-3beta-ol	C28H46O2	C28H46O2	0	c
m00964[c]	4alpha-hydroxymethyl-5alpha-cholesta-8-en-3beta-ol	C28H48O2	C28H48O2	0	c
m00965[c]	4alpha-hydroxytetrahydrobiopterin	C9H15N5O4	C9H15N5O4	0	c	C15522		CHEBI:15374
m00965[n]	4alpha-hydroxytetrahydrobiopterin	C9H15N5O4	C9H15N5O4	0	n	C15522		CHEBI:15374
m00966[c]	4alpha-methyl-5alpha-cholesta-8-en-3-one	C28H46O	C28H46O	0	c
m00967[c]	4alpha-methyl-cholesta-8-enol	C28H48O	C28H48O	0	c	C05110
m00968[c]	4alpha-methylzymosterol	C28H46O	C28H46O	0	c	C05103
m00969[c]	4-aminobutanal	C4H9NO	C4H9NO	0	c	C00555		CHEBI:17769
m00969[m]	4-aminobutanal	C4H9NO	C4H9NO	0	m	C00555		CHEBI:17769
m00969[s]	4-aminobutanal	C4H9NO	C4H9NO	0	s	C00555		CHEBI:17769
m00970[c]	4-aminobutyrate	C4H9NO2	C4H9NO2	0	c	C00334		CHEBI:16865
m00970[l]	4-aminobutyrate	C4H9NO2	C4H9NO2	0	l	C00334		CHEBI:16865
m00970[m]	4-aminobutyrate	C4H9NO2	C4H9NO2	0	m	C00334		CHEBI:16865
m00970[s]	4-aminobutyrate	C4H9NO2	C4H9NO2	0	s	C00334		CHEBI:16865
m00971[c]	4-androstene-3,17-dione	C19H26O2	C19H26O2	0	c	C00280		CHEBI:16422
m00971[r]	4-androstene-3,17-dione	C19H26O2	C19H26O2	0	r	C00280		CHEBI:16422
m00972[c]	4-bromo-3,5-cyclohexadiene-1,2-dione	C6H3BrO2	C6H3BrO2	0	c	C14846
m00973[c]	4-bromocatechol	C6H5BrO2	C6H5BrO2	0	c	C14843
m00974[c]	4-bromophenol	C6H5BrO	C6H5BrO	0	c	C14453
m00975[c]	4-bromophenol-2,3-epoxide	C6H5BrO2	C6H5BrO2	0	c	C14845
m00976[c]	4-cholesten-7alpha,12alpha,24(S)-triol-3-one	C27H44O4	C27H44O4	0	c			CHEBI:48714
m00977[c]	4-cholesten-7alpha,12alpha,27-triol-3-one	C27H44O4	C27H44O4	0	c
m00978[c]	4-cholesten-7alpha,24(S)-diol-3-one	C27H44O3	C27H44O3	0	c
m00979[c]	4-cholesten-7alpha,27-diol-3-one	C27H44O3	C27H44O3	0	c
m00980[m]	4-cis-decenoyl-CoA	C31H52N7O17P3S	C31H52N7O17P3S	0	m
m00980[p]	4-cis-decenoyl-CoA	C31H52N7O17P3S	C31H52N7O17P3S	0	p
m00981[c]	4-coumarate	C9H8O3	C9H8O3	0	c	C00811		CHEBI:32373
m00982[c]	4-coumaroyl-CoA	C30H42N7O18P3S	C30H42N7O18P3S	0	c	C00223		CHEBI:15499
m00983[c]	4-hydroperoxy-2-nonenal	C9H16O3	C9H16O3	0	c
m00984[c]	4-hydroperoxy-H4-neuroprostane	C22H32O6	C22H32O6	0	c
m00985[c]	4-hydroxy-1-(3-pyridinyl)-1-butanone	C9H11NO2	C9H11NO2	0	c	C19565
m00986[c]	4-hydroxy-17beta-estradiol	C18H24O3	C18H24O3	0	c	C14209
m00986[l]	4-hydroxy-17beta-estradiol	C18H24O3	C18H24O3	0	l	C14209
m00986[r]	4-hydroxy-17beta-estradiol	C18H24O3	C18H24O3	0	r	C14209
m00986[s]	4-hydroxy-17beta-estradiol	C18H24O3	C18H24O3	0	s	C14209
m00987[c]	4-hydroxy-17beta-estradiol-2-S-glutathione	C28H39N3O9S	C28H39N3O9S	0	c
m00987[m]	4-hydroxy-17beta-estradiol-2-S-glutathione	C28H39N3O9S	C28H39N3O9S	0	m
m00987[p]	4-hydroxy-17beta-estradiol-2-S-glutathione	C28H39N3O9S	C28H39N3O9S	0	p
m00987[r]	4-hydroxy-17beta-estradiol-2-S-glutathione	C28H39N3O9S	C28H39N3O9S	0	r
m00988[c]	4-hydroxy-2-nonenal	C9H16O2	C9H16O2	0	c			CHEBI:32585
m00989[m]	4-hydroxy-2-oxoglutarate	C5H6O6	C5H6O6	0	m	C01127		CHEBI:30923
m00990[c]	4-hydroxy-2-quinolinecarboxylic acid	C10H7NO3	C10H7NO3	0	c	C01717		CHEBI:18344
m00991[c]	4-hydroxy-3-nitrophenylacetate	C8H7NO5	C8H7NO5	0	c
m00992[c]	4-hydroxy-4-(methylnitrosoamino)-1-(3-pyridinyl)-1-butanone	C10H13N3O3	C10H13N3O3	0	c	C19566
m00993[c]	4-hydroxy-all-trans-retinoate	C20H28O3	C20H28O3	0	c	C16677
m00993[r]	4-hydroxy-all-trans-retinoate	C20H28O3	C20H28O3	0	r	C16677
m00994[c]	4-hydroxy-all-trans-retinyl-acetate	C22H32O3	C22H32O3	0	c
m00994[r]	4-hydroxy-all-trans-retinyl-acetate	C22H32O3	C22H32O3	0	r
m00995[c]	4-hydroxybenzoate	C7H6O3	C7H6O3	0	c	C00156		CHEBI:30763
m00995[m]	4-hydroxybenzoate	C7H6O3	C7H6O3	0	m	C00156		CHEBI:30763
m00996[c]	4-hydroxybenzoyl-CoA	C28H40N7O18P3S	C28H40N7O18P3S	0	c	C02949
m00997[c]	4-hydroxy-D4-neuroprostane	C22H32O5	C22H32O5	0	c
m00998[c]	4-hydroxy-debrisoquine	C10H13N3O	C10H13N3O	0	c
m00998[s]	4-hydroxy-debrisoquine	C10H13N3O	C10H13N3O	0	s
m00999[c]	4-hydroxy-E4-neuroprostane	C22H32O5	C22H32O5	0	c
m01000[c]	4-hydroxyestrone	C18H22O3	C18H22O3	0	c
m01000[l]	4-hydroxyestrone	C18H22O3	C18H22O3	0	l
m01000[r]	4-hydroxyestrone	C18H22O3	C18H22O3	0	r
m01001[c]	4-hydroxyestrone-2-S-glutathione	C28H37N3O9S	C28H37N3O9S	0	c
m01001[m]	4-hydroxyestrone-2-S-glutathione	C28H37N3O9S	C28H37N3O9S	0	m
m01001[p]	4-hydroxyestrone-2-S-glutathione	C28H37N3O9S	C28H37N3O9S	0	p
m01001[r]	4-hydroxyestrone-2-S-glutathione	C28H37N3O9S	C28H37N3O9S	0	r
m01002[c]	4-hydroxyphenylacetaldehyde	C8H8O2	C8H8O2	0	c	C03765		CHEBI:15621
m01003[c]	4-hydroxyphenylacetate	C8H8O3	C8H8O3	0	c	C00642		CHEBI:18101
m01003[s]	4-hydroxyphenylacetate	C8H8O3	C8H8O3	0	s	C00642		CHEBI:18101
m01004[c]	4-hydroxyphenyllactate	C9H10O4	C9H10O4	0	c	C03672		CHEBI:36659
m01005[c]	4-hydroxyphenylpyruvate	C9H8O4	C9H8O4	0	c	C01179		CHEBI:15999
m01005[m]	4-hydroxyphenylpyruvate	C9H8O4	C9H8O4	0	m	C01179		CHEBI:15999
m01006[c]	4-hydroxyretinoic acid	C20H28O3	C20H28O3	0	c	C16677
m01006[s]	4-hydroxyretinoic acid	C20H28O3	C20H28O3	0	s	C16677
m01007[c]	4-hydroxy-tolbutamide	C12H18N2O4S	C12H18N2O4S	0	c
m01007[s]	4-hydroxy-tolbutamide	C12H18N2O4S	C12H18N2O4S	0	s
m01008[c]	4-hydroxyvitamin A1	C20H30O2	C20H30O2	0	c
m01008[r]	4-hydroxyvitamin A1	C20H30O2	C20H30O2	0	r
m01009[c]	4-imidazolone-5-propanoate	C6H8N2O3	C6H8N2O3	0	c	C03680
m01010[c]	4-maleylacetoacetate	C8H8O6	C8H8O6	0	c	C01036		CHEBI:47904
m01011[c]	4-methoxy-17beta-estradiol	C19H26O3	C19H26O3	0	c
m01012[c]	4-methoxyestrone	C19H24O3	C19H24O3	0	c
m01013[c]	4-methyl-2-oxopentanoate	C6H10O3	C6H10O3	0	c	C00233		CHEBI:48430
m01013[m]	4-methyl-2-oxopentanoate	C6H10O3	C6H10O3	0	m	C00233		CHEBI:48430
m01014[c]	4-methylpentan-1-ol	C6H14O	C6H14O	0	c
m01015[m]	4-methyl-pentanoyl-CoA	C27H46N7O17P3S	C27H46N7O17P3S	0	m
m01016[c]	4-methylthio-2-oxobutanoic acid	C5H8O3S	C5H8O3S	0	c	C01180		CHEBI:33574
m01017[m]	4-methyl-trans-2-pentenoyl-CoA	C27H44N7O17P3S	C27H44N7O17P3S	0	m
m01018[c]	4-N-(n-acetyl-D-glucosaminyl)-protein	C13H20N4O8R2	C13H20N4O8R2	0	c	C04375
m01019[c]	4-nitrocatechol	C6H5NO4	C6H5NO4	0	c	C02235		CHEBI:16318
m01019[s]	4-nitrocatechol	C6H5NO4	C6H5NO4	0	s	C02235		CHEBI:16318
m01020[s]	4-nitrophenyl-phosphate	C6H6NO6P	C6H6NO6P	0	s	C03360		CHEBI:17440
m01021[c]	4-nitrophenyl-sulfate	C6H5NO6S	C6H5NO6S	0	c			CHEBI:35422
m01021[s]	4-nitrophenyl-sulfate	C6H5NO6S	C6H5NO6S	0	s			CHEBI:35422
m01022[c]	4-OH-13-cis-retinal	C20H28O2	C20H28O2	0	c
m01022[r]	4-OH-13-cis-retinal	C20H28O2	C20H28O2	0	r
m01023[c]	4-OH-9-cis-retinal	C20H28O2	C20H28O2	0	c
m01023[r]	4-OH-9-cis-retinal	C20H28O2	C20H28O2	0	r
m01024[c]	4-OH-retinal	C20H28O2	C20H28O2	0	c
m01024[r]	4-OH-retinal	C20H28O2	C20H28O2	0	r
m01025[c]	4-oxo-1-(3-pyridyl)-1-butanone	C9H9NO2	C9H9NO2	0	c	C19567
m01026[c]	4-oxo-13-cis-retinoate	C20H26O3	C20H26O3	0	c
m01026[r]	4-oxo-13-cis-retinoate	C20H26O3	C20H26O3	0	r
m01027[c]	4-oxo-2-nonenal	C9H14O2	C9H14O2	0	c			CHEBI:58972
m01028[c]	4-oxo-9-cis-retinal	C20H26O2	C20H26O2	0	c
m01028[r]	4-oxo-9-cis-retinal	C20H26O2	C20H26O2	0	r
m01029[c]	4-oxo-9-cis-retinoate	C20H26O3	C20H26O3	0	c
m01029[r]	4-oxo-9-cis-retinoate	C20H26O3	C20H26O3	0	r
m01030[c]	4-oxo-9-cis-retinoyl-beta-glucuronide	C26H34O9	C26H34O9	0	c
m01030[r]	4-oxo-9-cis-retinoyl-beta-glucuronide	C26H34O9	C26H34O9	0	r
m01031[c]	4-oxo-all-trans-retinoate	C20H26O3	C20H26O3	0	c
m01031[r]	4-oxo-all-trans-retinoate	C20H26O3	C20H26O3	0	r
m01032[c]	4-oxoretinol	C20H28O2	C20H28O2	0	c	C16683
m01033[c]	4-pyridoxate	C8H9NO4	C8H9NO4	0	c	C00847		CHEBI:17405
m01033[s]	4-pyridoxate	C8H9NO4	C8H9NO4	0	s	C00847		CHEBI:17405
m01034[c]	4-trimethylammoniobutanal	C7H16NO	C7H16NO	0	c	C01149		CHEBI:18020
m01035[c]	5-(3-pyridyl)-2-hydroxytetrahydrofuran	C9H11NO2	C9H11NO2	0	c	C19578
m01036[c]	5-(D-galactosyloxy)-L-lysine-procollagen	C13H23N3O8R2	C13H23N3O8R2	0	c	C04487
m01037[m]	5(S),12(R)-dihydroxy-eicosa-2,8-trans-6,14-cis-tetraenoyl-CoA	C41H66N7O19P3S	C41H66N7O19P3S	0	m
m01037[p]	5(S),12(R)-dihydroxy-eicosa-2,8-trans-6,14-cis-tetraenoyl-CoA	C41H66N7O19P3S	C41H66N7O19P3S	0	p
m01038[c]	5(S),6(S)-epoxy-15(R)-HEPE	C20H28O4	C20H28O4	0	c
m01038[n]	5(S),6(S)-epoxy-15(R)-HEPE	C20H28O4	C20H28O4	0	n
m01038[p]	5(S),6(S)-epoxy-15(R)-HEPE	C20H28O4	C20H28O4	0	p
m01038[r]	5(S),6(S)-epoxy-15(R)-HEPE	C20H28O4	C20H28O4	0	r
m01039[c]	5(S)-HEPE	C20H30O3	C20H30O3	0	c
m01039[p]	5(S)-HEPE	C20H30O3	C20H30O3	0	p
m01040[c]	5(S)-HETE	C20H32O3	C20H32O3	0	c	C04805		CHEBI:28209
m01040[m]	5(S)-HETE	C20H32O3	C20H32O3	0	m	C04805		CHEBI:28209
m01040[r]	5(S)-HETE	C20H32O3	C20H32O3	0	r	C04805		CHEBI:28209
m01041[c]	5(S)-HpEPE	C20H30O4	C20H30O4	0	c
m01041[n]	5(S)-HpEPE	C20H30O4	C20H30O4	0	n
m01042[c]	5(S)-HPETE	C20H32O4	C20H32O4	0	c	C05356
m01042[m]	5(S)-HPETE	C20H32O4	C20H32O4	0	m	C05356
m01043[c]	5-(S-L-cysteinyl)-dopaquinone	C12H14N2O6S	C12H14N2O6S	0	c
m01044[c]	5,10-methenyl-THF	C20H22N7O6	C20H22N7O6	0	c	C00445		CHEBI:15638
m01044[m]	5,10-methenyl-THF	C20H22N7O6	C20H22N7O6	0	m	C00445		CHEBI:15638
m01045[c]	5,10-methylene-THF	C20H23N7O6	C20H23N7O6	0	c	C00143		CHEBI:1989
m01045[m]	5,10-methylene-THF	C20H23N7O6	C20H23N7O6	0	m	C00143		CHEBI:1989
m01046[c]	5,12,18R-TriHEPE	C20H30O5	C20H30O5	0	c
m01047[c]	5,12,20-TriHETE	C20H32O5	C20H32O5	0	c
m01048[c]	5,12-DiHETE	C20H32O4	C20H32O4	0	c
m01049[c]	5,12-dihydroxy-(6E)-LTB5	C20H30O4	C20H30O4	0	c
m01050[c]	5,15-DiHETE	C20H32O4	C20H32O4	0	c
m01051[c]	5,6-DHET	C20H34O4	C20H34O4	0	c	C14772
m01052[c]	5,6-Dihydrouracil	C4H6N2O2	C4H6N2O2	0	c	C00429		CHEBI:15901
m01053[c]	5,6-dihydroxyindole-2-carboxylate	C9H7NO4	C9H7NO4	0	c	C04185		CHEBI:16875
m01054[c]	5,6-EET	C20H32O3	C20H32O3	0	c	C14768
m01054[r]	5,6-EET	C20H32O3	C20H32O3	0	r	C14768
m01055[c]	5,6-epoxy-(8Z)-tetradecenoic acid	C14H24O3	C14H24O3	0	c
m01056[c]	5,6-epoxy,(18R)-HEPE	C20H28O4	C20H28O4	0	c
m01057[c]	5,6-epoxy-13-cis-retinoate	C20H28O3	C20H28O3	0	c
m01057[r]	5,6-epoxy-13-cis-retinoate	C20H28O3	C20H28O3	0	r
m01058[c]	5,6-epoxytetraene	C20H30O4	C20H30O4	0	c	C14815
m01058[n]	5,6-epoxytetraene	C20H30O4	C20H30O4	0	n	C14815
m01058[p]	5,6-epoxytetraene	C20H30O4	C20H30O4	0	p	C14815
m01058[r]	5,6-epoxytetraene	C20H30O4	C20H30O4	0	r	C14815
m01059[c]	5,6-indolequinone-2-carboxylate	C9H5NO4	C9H5NO4	0	c	C17938
m01060[c]	5,8-epoxy-13-cis-retinoate	C20H28O3	C20H28O3	0	c
m01061[c]	5,9,11-trihydroxyprosta-(6E,14Z)-dien-1-oate	C20H34O5	C20H34O5	0	c
m01062[c]	5,9-cyclo-6,8,12-trihydroxy-(10E,14Z)-eicosadienoic acid	C20H34O5	C20H34O5	0	c
m01063[c]	5,9-cyclo-6,8-cycloperoxy-12-hydroperoxy-(10E,14Z)-eicosadienoate	C20H32O6	C20H32O6	0	c
m01064[c]	5alpha-androstane-3,17-dione	C19H28O2	C19H28O2	0	c	C00674
m01064[r]	5alpha-androstane-3,17-dione	C19H28O2	C19H28O2	0	r	C00674
m01065[c]	5alpha-androstane-3alpha,17beta-diol	C19H32O2	C19H32O2	0	c	C12525		CHEBI:36713
m01066[c]	5alpha-cholesta-7,24-dien-3beta-ol	C27H44O	C27H44O	0	c	C05439		CHEBI:16290
m01067[c]	5alpha-cholesta-8,24-dien-3-one	C27H42O	C27H42O	0	c			CHEBI:52386
m01068[c]	5alpha-cholesta-8-en-3-one	C27H44O	C27H44O	0	c
m01069[c]	5-alpha-dihydrotestosterone	C19H30O2	C19H30O2	0	c	C03917		CHEBI:16330
m01069[r]	5-alpha-dihydrotestosterone	C19H30O2	C19H30O2	0	r	C03917		CHEBI:16330
m01069[s]	5-alpha-dihydrotestosterone	C19H30O2	C19H30O2	0	s	C03917		CHEBI:16330
m01070[c]	5alpha-dihydrotestosterone-glucuronide	C25H38O8	C25H38O8	0	c
m01070[r]	5alpha-dihydrotestosterone-glucuronide	C25H38O8	C25H38O8	0	r
m01070[s]	5alpha-dihydrotestosterone-glucuronide	C25H38O8	C25H38O8	0	s
m01071[c]	5alpha-dihydrotestosterone-sulfate	C19H30O5S	C19H30O5S	0	c
m01071[s]	5alpha-dihydrotestosterone-sulfate	C19H30O5S	C19H30O5S	0	s
m01072[c]	5alpha-pregnane-3,20-dione	C21H32O2	C21H32O2	0	c	C03681		CHEBI:28952
m01072[n]	5alpha-pregnane-3,20-dione	C21H32O2	C21H32O2	0	n	C03681		CHEBI:28952
m01073[p]	5-amino-2-oxopentanoic acid	C5H9NO3	C5H9NO3	0	p	C01110		CHEBI:49268
m01074[c]	5-aminolevulinate	C5H9NO3	C5H9NO3	0	c	C00430		CHEBI:17549
m01074[m]	5-aminolevulinate	C5H9NO3	C5H9NO3	0	m	C00430		CHEBI:17549
m01075[c]	5-androstene-3,17-dione	C19H26O2	C19H26O2	0	c	C20252
m01075[r]	5-androstene-3,17-dione	C19H26O2	C19H26O2	0	r	C20252
m01076[m]	5beta-cholestan-3alpha,7alpha,12alpha,24(S),27-pentol	C27H48O3	C27H48O3	0	m
m01077[c]	5beta-cholestan-3alpha,7alpha,12alpha,24(S)-tetrol	C27H48O4	C27H48O4	0	c
m01077[m]	5beta-cholestan-3alpha,7alpha,12alpha,24(S)-tetrol	C27H48O4	C27H48O4	0	m
m01078[c]	5beta-cholestan-3alpha,7alpha,12alpha-triol	C27H48O3	C27H48O3	0	c	C05454		CHEBI:16496
m01078[m]	5beta-cholestan-3alpha,7alpha,12alpha-triol	C27H48O3	C27H48O3	0	m	C05454		CHEBI:16496
m01078[r]	5beta-cholestan-3alpha,7alpha,12alpha-triol	C27H48O3	C27H48O3	0	r	C05454		CHEBI:16496
m01079[m]	5beta-cholestan-3alpha,7alpha,24(S),27-tetrol	C27H48O4	C27H48O4	0	m
m01080[c]	5beta-cholestan-3alpha,7alpha,24(S)-triol	C27H48O3	C27H48O3	0	c
m01080[m]	5beta-cholestan-3alpha,7alpha,24(S)-triol	C27H48O3	C27H48O3	0	m
m01081[c]	5beta-cholestan-7alpha,12alpha,24(S)-triol-3-one	C27H46O4	C27H46O4	0	c
m01082[c]	5beta-cholestan-7alpha,12alpha,27-triol-3-one	C27H46O4	C27H46O4	0	c
m01083[c]	5beta-cholestan-7alpha,24(S)-diol-3-one	C27H46O3	C27H46O3	0	c
m01084[c]	5beta-cholestan-7alpha,27-diol-3-one	C27H46O3	C27H46O3	0	c
m01085[r]	5beta-cholestane-3alpha,7alpha,12alpha,23,25-pentol	C27H48O5	C27H48O5	0	r
m01086[r]	5beta-cholestane-3alpha,7alpha,12alpha,24r,25-pentol	C27H48O5	C27H48O5	0	r
m01087[r]	5beta-cholestane-3alpha,7alpha,12alpha,24s,25-pentol	C27H48O5	C27H48O5	0	r
m01088[r]	5beta-cholestane-3alpha,7alpha,12alpha,25,27-pentol	C27H48O5	C27H48O5	0	r
m01089[r]	5beta-cholestane-3alpha,7alpha,12alpha,25-tetrol	C27H48O4	C27H48O4	0	r
m01090[c]	5beta-cholestane-3alpha,7alpha,12alpha,26-tetrol	C27H48O4	C27H48O4	0	c	C05446		CHEBI:17278;CHEBI:48939
m01090[m]	5beta-cholestane-3alpha,7alpha,12alpha,26-tetrol	C27H48O4	C27H48O4	0	m	C05446		CHEBI:17278;CHEBI:48939
m01091[c]	5beta-cholestane-3alpha,7alpha,12alpha,27,27-pentaol	C27H48O5	C27H48O5	0	c
m01091[m]	5beta-cholestane-3alpha,7alpha,12alpha,27,27-pentaol	C27H48O5	C27H48O5	0	m
m01092[c]	5beta-cholestane-3alpha,7alpha,12alpha,27-tetraol	C27H48O4	C27H48O4	0	c	C05446
m01092[m]	5beta-cholestane-3alpha,7alpha,12alpha,27-tetraol	C27H48O4	C27H48O4	0	m	C05446
m01093[c]	5beta-cholestane-3alpha,7alpha,26-triol	C27H48O3	C27H48O3	0	c	C05444		CHEBI:28540
m01093[m]	5beta-cholestane-3alpha,7alpha,26-triol	C27H48O3	C27H48O3	0	m	C05444		CHEBI:28540
m01094[m]	5beta-cholestane-3alpha,7alpha,27-triol	C27H48O3	C27H48O3	0	m
m01095[c]	5beta-cholestane-3alpha,7alpha-diol	C27H48O2	C27H48O2	0	c	C05452		CHEBI:28047
m01095[m]	5beta-cholestane-3alpha,7alpha-diol	C27H48O2	C27H48O2	0	m	C05452		CHEBI:28047
m01096[m]	5-carboxy-alpha-chromanol	C19H28O4	C19H28O4	0	m
m01097[c]	5-carboxy-gamma-chromanol	C18H26O4	C18H26O4	0	c
m01097[m]	5-carboxy-gamma-chromanol	C18H26O4	C18H26O4	0	m
m01098[c]	5-deoxyadenosine	C10H13N5O3	C10H13N5O3	0	c	C05198
m01098[s]	5-deoxyadenosine	C10H13N5O3	C10H13N5O3	0	s	C05198
m01099[c]	5-formiminotetrahydrofolate	C20H24N8O6	C20H24N8O6	0	c	C00664		CHEBI:15639
m01100[c]	5-formyl-THF	C20H23N7O7	C20H23N7O7	0	c	C03479		CHEBI:15640
m01100[m]	5-formyl-THF	C20H23N7O7	C20H23N7O7	0	m	C03479		CHEBI:15640
m01100[s]	5-formyl-THF	C20H23N7O7	C20H23N7O7	0	s	C03479		CHEBI:15640
m01101[p]	5-guanidino-2-oxopentanoate	C6H11N3O3	C6H11N3O3	0	p	C03771		CHEBI:28116
m01102[c]	5-hydroxyindoleacetaldehyde	C10H9NO2	C10H9NO2	0	c	C05634		CHEBI:50157;CHEBI:2070
m01103[c]	5-hydroxyindoleacetate	C10H9NO3	C10H9NO3	0	c	C05635
m01104[c]	5-hydroxyisourate	C5H4N4O4	C5H4N4O4	0	c	C11821		CHEBI:18072
m01104[m]	5-hydroxyisourate	C5H4N4O4	C5H4N4O4	0	m	C11821		CHEBI:18072
m01104[p]	5-hydroxyisourate	C5H4N4O4	C5H4N4O4	0	p	C11821		CHEBI:18072
m01105[c]	5-hydroxykynurenamine	C9H12N2O2	C9H12N2O2	0	c	C05638		CHEBI:28715
m01106[c]	5-hydroxykynurenine	C10H12N2O4	C10H12N2O4	0	c	C05651
m01107[c]	5-hydroxy-L-tryptophan	C11H12N2O3	C11H12N2O3	0	c	C00643		CHEBI:17780
m01107[s]	5-hydroxy-L-tryptophan	C11H12N2O3	C11H12N2O3	0	s	C00643		CHEBI:17780
m01108[c]	5-hydroxy-N-formylkynurenine	C11H12N2O5	C11H12N2O5	0	c	C05648
m01109[c]	5-hydroxy-omeprazole	C17H19N3O4S	C17H19N3O4S	0	c
m01109[s]	5-hydroxy-omeprazole	C17H19N3O4S	C17H19N3O4S	0	s
m01110[c]	5-hydroxytryptophol	C10H11NO2	C10H11NO2	0	c
m01111[s]	5-L-gamma-glutamyl	C5H7NO3	C5H7NO3	0	s
m01112[c]	5-methoxyindoleacetate	C11H11NO3	C11H11NO3	0	c	C05660
m01113[c]	5-methoxytryptophol	C11H13NO2	C11H13NO2	0	c
m01114[c]	5-methyltetrahydropteroyltri-L-glutamate	C30H39N9O12	C30H39N9O12	0	c	C04489		CHEBI:17614
m01115[c]	5-methyl-THF	C20H25N7O6	C20H25N7O6	0	c	C00440		CHEBI:15641
m01115[s]	5-methyl-THF	C20H25N7O6	C20H25N7O6	0	s	C00440		CHEBI:15641
m01116[c]	5-methylthioadenosine	C11H15N5O3S	C11H15N5O3S	0	c	C00170		CHEBI:17509
m01117[c]	5-nitro-gamma-tocopherol	C28H47NO4	C28H47NO4	0	c
m01118[c]	5-oxo-(6E)-12-epi-LTB4	C20H30O4	C20H30O4	0	c
m01118[m]	5-oxo-(6E)-12-epi-LTB4	C20H30O4	C20H30O4	0	m
m01118[p]	5-oxo-(6E)-12-epi-LTB4	C20H30O4	C20H30O4	0	p
m01118[r]	5-oxo-(6E)-12-epi-LTB4	C20H30O4	C20H30O4	0	r
m01119[m]	5-oxo-12(R)-hydroxy-eicosa-(2E,8E,10E,14Z)-tetraenoyl-CoA	C41H64N7O19P3S	C41H64N7O19P3S	0	m
m01119[p]	5-oxo-12(R)-hydroxy-eicosa-(2E,8E,10E,14Z)-tetraenoyl-CoA	C41H64N7O19P3S	C41H64N7O19P3S	0	p
m01120[c]	5-oxo-12(R)-hydroxy-eicosa-(8E,10E,14Z)-trienoyl-CoA	C41H66N7O19P3S	C41H66N7O19P3S	0	c
m01120[m]	5-oxo-12(R)-hydroxy-eicosa-(8E,10E,14Z)-trienoyl-CoA	C41H66N7O19P3S	C41H66N7O19P3S	0	m
m01120[p]	5-oxo-12(R)-hydroxy-eicosa-(8E,10E,14Z)-trienoyl-CoA	C41H66N7O19P3S	C41H66N7O19P3S	0	p
m01120[r]	5-oxo-12(R)-hydroxy-eicosa-(8E,10E,14Z)-trienoyl-CoA	C41H66N7O19P3S	C41H66N7O19P3S	0	r
m01121[m]	5-oxo-12(S)-hydroxy-eicosa-(2E,8E,10E,14Z)-tetraenoyl-CoA	C41H64N7O19P3S	C41H64N7O19P3S	0	m
m01121[p]	5-oxo-12(S)-hydroxy-eicosa-(2E,8E,10E,14Z)-tetraenoyl-CoA	C41H64N7O19P3S	C41H64N7O19P3S	0	p
m01122[c]	5-oxo-12(S)-hydroxy-eicosa-(8E,10E,14Z)-trienoyl-CoA	C41H66N7O19P3S	C41H66N7O19P3S	0	c
m01122[m]	5-oxo-12(S)-hydroxy-eicosa-(8E,10E,14Z)-trienoyl-CoA	C41H66N7O19P3S	C41H66N7O19P3S	0	m
m01122[p]	5-oxo-12(S)-hydroxy-eicosa-(8E,10E,14Z)-trienoyl-CoA	C41H66N7O19P3S	C41H66N7O19P3S	0	p
m01122[r]	5-oxo-12(S)-hydroxy-eicosa-(8E,10E,14Z)-trienoyl-CoA	C41H66N7O19P3S	C41H66N7O19P3S	0	r
m01123[c]	5-oxo-12-HETE	C20H30O3	C20H30O3	0	c
m01124[c]	5-oxo-6-trans-LTB4	C20H30O4	C20H30O4	0	c
m01124[m]	5-oxo-6-trans-LTB4	C20H30O4	C20H30O4	0	m
m01124[p]	5-oxo-6-trans-LTB4	C20H30O4	C20H30O4	0	p
m01124[r]	5-oxo-6-trans-LTB4	C20H30O4	C20H30O4	0	r
m01125[c]	5-oxo-EPE	C20H28O3	C20H28O3	0	c
m01125[p]	5-oxo-EPE	C20H28O3	C20H28O3	0	p
m01126[c]	5-oxo-ETE	C20H30O3	C20H30O3	0	c
m01127[c]	5-oxoproline	C5H7NO3	C5H7NO3	0	c	C01879		CHEBI:16010
m01128[c]	5-oxoprolyl-peptide	C7H9N2O4R(C2H2NOR)n	C7H9N2O4R(C2H2NOR)n	0	c	C02805
m01129[c]	5-phosphopolynucleotide	C10H18O13P2R2(C5H8O6PR)n	C10H18O13P2R2(C5H8O6PR)n	0	c	C03475
m01130[c]	5-phosphoribosyl-4-carboxy-5-aminoimidazole	C9H14N3O9P	C9H14N3O9P	0	c	C04751		CHEBI:28413
m01131[c]	5-phosphoribosylamine	C5H12NO7P	C5H12NO7P	0	c	C03090		CHEBI:37737
m01132[c]	5-phosphoribosylformylglycinamidine	C8H16N3O8P	C8H16N3O8P	0	c	C04640		CHEBI:18413
m01133[c]	5-pp-inspP5	C6H19O27P7	C6H19O27P7	0	c	C11526		CHEBI:30164
m01133[n]	5-pp-inspP5	C6H19O27P7	C6H19O27P7	0	n	C11526		CHEBI:30164
m01134[c]	5-S-cysteinyldopa	C12H16N2O6S	C12H16N2O6S	0	c	C17935
m01135[c]	5-S-glutathionyl-adrenochrome hydroquinone	C19H26N4O9S	C19H26N4O9S	0	c
m01136[c]	5-S-glutathionyl-aminochrome reduced	C18H24N4O8S	C18H24N4O8S	0	c
m01137[c]	5-S-glutathionyl-dopachrome hydroquinone	C19H24N4O10S	C19H24N4O10S	0	c
m01138[c]	5-S-glutathionyl-dopamine	C18H26N4O8S	C18H26N4O8S	0	c
m01139[c]	5-S-glutathionyl-L-dopa	C19H26N4O10S	C19H26N4O10S	0	c
m01140[c]	5-S-glutathionyl-noradrenochrome hydroquinone	C18H24N4O9S	C18H24N4O9S	0	c
m01141[c]	5-tetradecenoyl-CoA	C35H60N7O17P3S	C35H60N7O17P3S	0	c
m01141[m]	5-tetradecenoyl-CoA	C35H60N7O17P3S	C35H60N7O17P3S	0	m
m01141[p]	5-tetradecenoyl-CoA	C35H60N7O17P3S	C35H60N7O17P3S	0	p
m01141[r]	5-tetradecenoyl-CoA	C35H60N7O17P3S	C35H60N7O17P3S	0	r
m01142[r]	6-(alpha-D-glucosaminyl)-1D-myo-inositol	C12H23NO10	C12H23NO10	0	r	C15658
m01143[c]	6-(alpha-D-glucosaminyl)-1-phosphatidyl-1D-myo-inositol	C17H28NO17PR2	C17H28NO17PR2	0	c	C04248		CHEBI:17049
m01143[r]	6-(alpha-D-glucosaminyl)-1-phosphatidyl-1D-myo-inositol	C17H28NO17PR2	C17H28NO17PR2	0	r	C04248		CHEBI:17049
m01144[m]	6(R)-hydroxy-tetradeca-(2E,4E,8Z)-trienoate	C14H22O3	C14H22O3	0	m
m01145[m]	6(R)-hydroxy-tetradeca-(2E,8Z)-dienoate	C14H24O3	C14H24O3	0	m
m01146[m]	6(R)-hydroxy-tetradeca-(4E,8Z)-dienoate	C14H24O3	C14H24O3	0	m
m01147[m]	6(S)-hydroxy-tetradeca-(2E,4E,8Z)-trienoate	C14H22O3	C14H22O3	0	m
m01148[m]	6(S)-hydroxy-tetradeca-(2E,8Z)-dienoate	C14H24O3	C14H24O3	0	m
m01149[m]	6(S)-hydroxy-tetradeca-(4E,8Z)-dienoate	C14H24O3	C14H24O3	0	m
m01150[c]	6,7-dihydro-12-epi-LTB4	C20H34O4	C20H34O4	0	c
m01150[m]	6,7-dihydro-12-epi-LTB4	C20H34O4	C20H34O4	0	m
m01150[p]	6,7-dihydro-12-epi-LTB4	C20H34O4	C20H34O4	0	p
m01151[c]	6,7-dihydro-5-oxo-12-epi-LTB4	C20H32O4	C20H32O4	0	c
m01151[m]	6,7-dihydro-5-oxo-12-epi-LTB4	C20H32O4	C20H32O4	0	m
m01151[p]	6,7-dihydro-5-oxo-12-epi-LTB4	C20H32O4	C20H32O4	0	p
m01151[r]	6,7-dihydro-5-oxo-12-epi-LTB4	C20H32O4	C20H32O4	0	r
m01152[c]	6,7-dihydro-5-oxo-LTB4	C20H32O4	C20H32O4	0	c
m01152[m]	6,7-dihydro-5-oxo-LTB4	C20H32O4	C20H32O4	0	m
m01152[p]	6,7-dihydro-5-oxo-LTB4	C20H32O4	C20H32O4	0	p
m01152[r]	6,7-dihydro-5-oxo-LTB4	C20H32O4	C20H32O4	0	r
m01153[c]	6,7-dihydro-LTB4	C20H34O4	C20H34O4	0	c
m01153[m]	6,7-dihydro-LTB4	C20H34O4	C20H34O4	0	m
m01153[p]	6,7-dihydro-LTB4	C20H34O4	C20H34O4	0	p
m01153[r]	6,7-dihydro-LTB4	C20H34O4	C20H34O4	0	r
m01154[c]	6,7-dihydroxy-1,2,3,4-tetrahydroisoquinoline	C9H11NO2	C9H11NO2	0	c
m01155[c]	6-[(1S,2R)-1,2-dihydroxy-3-triphosphooxypropyl]-7,8-dihydropterin	C9H16N5O13P3	C9H16N5O13P3	0	c	C04895		CHEBI:18372
m01155[n]	6-[(1S,2R)-1,2-dihydroxy-3-triphosphooxypropyl]-7,8-dihydropterin	C9H16N5O13P3	C9H16N5O13P3	0	n	C04895		CHEBI:18372
m01156[c]	6-[2,3-dihydroxy-1-(hydroxymethyl)propyl]-1,2-dihydro-7-hydroxy-9-methoxy-cyclopenta[c][1]benzopyran-3,4-dione	C17H18O8	C17H18O8	0	c	C19590
m01157[p]	6-amino-2-oxohexanoate	C6H11NO3	C6H11NO3	0	p	C03239		CHEBI:17534
m01158[c]	6beta-hydroxytestosterone	C19H28O3	C19H28O3	0	c	C14497		CHEBI:34477
m01158[r]	6beta-hydroxytestosterone	C19H28O3	C19H28O3	0	r	C14497		CHEBI:34477
m01158[s]	6beta-hydroxytestosterone	C19H28O3	C19H28O3	0	s	C14497		CHEBI:34477
m01159[c]	6-deoxy-L-galactose	C6H12O5	C6H12O5	0	c	C01019		CHEBI:2181
m01159[l]	6-deoxy-L-galactose	C6H12O5	C6H12O5	0	l	C01019		CHEBI:2181
m01159[s]	6-deoxy-L-galactose	C6H12O5	C6H12O5	0	s	C01019		CHEBI:2181
m01160[c]	6-hydroxy-1,2,3,4-tetrahydro-beta-carboline	C11H12N2O	C11H12N2O	0	c
m01161[c]	6-hydroxymelatonin	C13H16N2O3	C13H16N2O3	0	c	C05643
m01162[c]	6-hydroxymelatonin-sulfate	C13H16N2O6S	C13H16N2O6S	0	c
m01163[c]	6-hydroxypaclitaxel	C47H51NO15	C47H51NO15	0	c			CHEBI:63859
m01163[s]	6-hydroxypaclitaxel	C47H51NO15	C47H51NO15	0	s			CHEBI:63859
m01164[c]	6-lactoyl-5,6,7,8-tetrahydropterin	C9H13N5O3	C9H13N5O3	0	c	C04244		CHEBI:17248
m01165[m]	6-methoxy-3-methyl-2-all-trans-decaprenyl-1,4-benzoquinol	C58H92O3	C58H92O3	0	m
m01166[c]	6-methylmercaptopurine	C6H6N4S	C6H6N4S	0	c	C16614
m01167[c]	6-oxo-prostaglandin E1	C20H32O6	C20H32O6	0	c	C05962
m01168[c]	6-oxo-prostaglandin F1alpha	C20H34O6	C20H34O6	0	c	C01312
m01168[r]	6-oxo-prostaglandin F1alpha	C20H34O6	C20H34O6	0	r	C01312
m01169[c]	6-phospho-D-gluconate	C6H13O10P	C6H13O10P	0	c	C00345		CHEBI:48928;CHEBI:16863
m01169[r]	6-phospho-D-gluconate	C6H13O10P	C6H13O10P	0	r	C00345		CHEBI:48928;CHEBI:16863
m01170[c]	6-pyruvoyltetrahydropterin	C9H11N5O3	C9H11N5O3	0	c	C03684		CHEBI:17804
m01170[n]	6-pyruvoyltetrahydropterin	C9H11N5O3	C9H11N5O3	0	n	C03684		CHEBI:17804
m01171[c]	6-trans-12-epi-LTB4	C20H32O4	C20H32O4	0	c
m01171[m]	6-trans-12-epi-LTB4	C20H32O4	C20H32O4	0	m
m01171[p]	6-trans-12-epi-LTB4	C20H32O4	C20H32O4	0	p
m01172[c]	6-trans-LTB4	C20H32O4	C20H32O4	0	c
m01172[m]	6-trans-LTB4	C20H32O4	C20H32O4	0	m
m01172[p]	6-trans-LTB4	C20H32O4	C20H32O4	0	p
m01173[c]	7,12-dimethylbenz[a]anthracene 5,6-oxide	C20H16O	C20H16O	0	c	C19604
m01174[c]	7,12-dimethylbenz[a]anthracene	C20H16	C20H16	0	c	C19488
m01174[s]	7,12-dimethylbenz[a]anthracene	C20H16	C20H16	0	s	C19488
m01175[c]	7,8-dihydro-7-hydroxy-8-S-glutathionyl-benzo[a]pyrene	C30H29N3O7S	C30H29N3O7S	0	c	C14856
m01176[c]	7,8-epoxy-(4Z,10Z)-hexadecadienoic acid	C16H26O3	C16H26O3	0	c
m01177[c]	7alpha,12alpha-dihydroxy-5beta-cholestan-3-one	C27H46O3	C27H46O3	0	c	C05453		CHEBI:2288
m01178[c]	7alpha,12alpha-dihydroxycholest-4-en-3-one	C27H44O3	C27H44O3	0	c	C17339		CHEBI:28477
m01178[r]	7alpha,12alpha-dihydroxycholest-4-en-3-one	C27H44O3	C27H44O3	0	r	C17339		CHEBI:28477
m01179[r]	7alpha,25-dihydroxy-4-cholesten-3-one	C27H44O3	C27H44O3	0	r	C17332
m01180[m]	7alpha-hydroxy-3-oxo-4-cholestenoic acid	C27H42O4	C27H42O4	0	m
m01181[c]	7alpha-hydroxy-5beta-cholestan-3-one	C27H46O2	C27H46O2	0	c	C05451		CHEBI:2290
m01182[c]	7alpha-hydroxycholest-4-en-3-one	C27H44O2	C27H44O2	0	c	C05455		CHEBI:17899
m01182[r]	7alpha-hydroxycholest-4-en-3-one	C27H44O2	C27H44O2	0	r	C05455		CHEBI:17899
m01183[r]	7alpha-hydroxycholesterol	C27H46O2	C27H46O2	0	r	C03594		CHEBI:17500
m01184[c]	7alpha-hydroxypregnenolone	C21H32O3	C21H32O3	0	c	C18038
m01185[m]	7-carboxy-alpha-chromanol	C21H32O4	C21H32O4	0	m
m01186[m]	7-carboxy-alpha-tocotrienol	C21H30O4	C21H30O4	0	m
m01187[m]	7-carboxy-gamma-chromanol	C20H30O4	C20H30O4	0	m
m01188[m]	7-carboxy-gamma-tocotrienol	C20H28O4	C20H28O4	0	m
m01189[c]	7-dehydrodesmosterol	C27H42O	C27H42O	0	c	C05107		CHEBI:27910
m01190[c]	7-HETE	C20H32O3	C20H32O3	0	c
m01191[c]	7-hexadecenoyl-CoA	C37H64N7O17P3S	C37H64N7O17P3S	0	c
m01191[m]	7-hexadecenoyl-CoA	C37H64N7O17P3S	C37H64N7O17P3S	0	m
m01191[p]	7-hexadecenoyl-CoA	C37H64N7O17P3S	C37H64N7O17P3S	0	p
m01191[r]	7-hexadecenoyl-CoA	C37H64N7O17P3S	C37H64N7O17P3S	0	r
m01192[c]	7-hydroperoxy-H4-neuroprostane	C22H32O6	C22H32O6	0	c
m01193[c]	7-hydroxy-D4-neuroprostane	C22H32O5	C22H32O5	0	c
m01194[c]	7-hydroxy-E4-neuroprostane	C22H32O5	C22H32O5	0	c
m01195[c]	7-hydroxymethyl-12-methylbenz[a]anthracene sulfate	C20H16O4S	C20H16O4S	0	c	C19562
m01196[c]	7-hydroxymethyl-12-methylbenz[a]anthracene	C20H16O	C20H16O	0	c	C19561
m01197[c]	7-palmitoleic acid	C16H30O2	C16H30O2	0	c
m01197[l]	7-palmitoleic acid	C16H30O2	C16H30O2	0	l
m01197[r]	7-palmitoleic acid	C16H30O2	C16H30O2	0	r
m01197[s]	7-palmitoleic acid	C16H30O2	C16H30O2	0	s
m01198[c]	7-peroxy-docosahexaenoate	C22H31O4	C22H31O4	0	c
m01199[m]	8(R)-hydroxy-hexadeca-(2E,4E,6E,10Z)-tetraenoate	C16H24O3	C16H24O3	0	m
m01200[m]	8(R)-hydroxy-hexadeca-(2E,6E,10Z)-trienoate	C16H26O3	C16H26O3	0	m
m01201[m]	8(R)-hydroxy-hexadeca-(4E,6E,10Z)-trienoate	C16H26O3	C16H26O3	0	m
m01202[c]	8(S)-HETE	C20H32O3	C20H32O3	0	c
m01203[c]	8(S)-HPETE	C20H32O4	C20H32O4	0	c	C14823
m01204[m]	8(S)-hydroxy-hexadeca-(2E,4E,6E,10Z)-tetraenoate	C16H24O3	C16H24O3	0	m
m01205[m]	8(S)-hydroxy-hexadeca-(2E,6E,10Z)-trienoate	C16H26O3	C16H26O3	0	m
m01206[m]	8(S)-hydroxy-hexadeca-(4E,6E,10Z)-trienoate	C16H26O3	C16H26O3	0	m
m01207[c]	8,11-eicosadienoic acid	C20H36O2	C20H36O2	0	c
m01207[l]	8,11-eicosadienoic acid	C20H36O2	C20H36O2	0	l
m01207[r]	8,11-eicosadienoic acid	C20H36O2	C20H36O2	0	r
m01207[s]	8,11-eicosadienoic acid	C20H36O2	C20H36O2	0	s
m01208[c]	8,9-DHET	C20H34O4	C20H34O4	0	c	C14773
m01209[c]	8,9-EET	C20H32O3	C20H32O3	0	c	C14769
m01209[r]	8,9-EET	C20H32O3	C20H32O3	0	r	C14769
m01210[c]	8,9-epoxy-(5Z)-tetradecenoic acid	C14H24O3	C14H24O3	0	c
m01211[c]	8alpha-hydroxy-gamma-tocopherone	C28H48O3	C28H48O3	0	c
m01212[c]	8alpha-hydroxytocopherone	C29H50O3	C29H50O3	0	c
m01213[c]	8-HETE	C20H32O3	C20H32O3	0	c
m01214[c]	8-peroxy-(5Z,9E,11Z,14Z)-eicosatetraenoate	C20H31O4	C20H31O4	0	c
m01215[c]	8-peroxy-docosahexaenoate	C22H31O4	C22H31O4	0	c
m01216[c]	9(10)-EpOME	C18H32O3	C18H32O3	0	c	C14825
m01216[r]	9(10)-EpOME	C18H32O3	C18H32O3	0	r	C14825
m01217[c]	9(S)-HPODE	C18H32O4	C18H32O4	0	c	C14827		CHEBI:34498
m01218[c]	9,10-12,13-diepoxy-octadecanoate	C18H32O4	C18H32O4	0	c
m01219[c]	9,10-epoxy-(6Z,12Z)-octadecadienoic acid	C18H30O3	C18H30O3	0	c
m01220[c]	9,10-hydroxyoctadec-12(Z)-enoate	C18H34O4	C18H34O4	0	c	C14828
m01220[r]	9,10-hydroxyoctadec-12(Z)-enoate	C18H34O4	C18H34O4	0	r	C14828
m01221[c]	9,11,15-trihydroxyprosta-(5Z,13E)-dien-1-oate	C20H34O5	C20H34O5	0	c
m01222[c]	9,11-cycloperoxy-15-hydroperoxy-(5Z,13E)-eicosadienoate	C20H32O6	C20H32O6	0	c
m01223[c]	9,11-cycloperoxy-5-hydroperoxy-(6E,14Z)-eicosadienoate	C20H32O6	C20H32O6	0	c
m01224[c]	9,13-cis-retinoate	C20H28O2	C20H28O2	0	c
m01225[m]	9-carboxy-alpha-chromanol	C24H38O4	C24H38O4	0	m
m01226[m]	9-carboxy-alpha-tocotrienol	C24H34O4	C24H34O4	0	m
m01227[m]	9-carboxy-gamma-chromanol	C23H36O4	C23H36O4	0	m
m01228[m]	9-carboxy-gamma-tocotrienol	C23H32O4	C23H32O4	0	m
m01229[c]	9-cis-4-oxo-13,14-dihydro-retinoate	C20H28O3	C20H28O3	0	c
m01230[c]	9-cis-retinal	C20H28O	C20H28O	0	c	C16681
m01230[r]	9-cis-retinal	C20H28O	C20H28O	0	r	C16681
m01231[c]	9-cis-retinoate	C20H28O2	C20H28O2	0	c
m01231[r]	9-cis-retinoate	C20H28O2	C20H28O2	0	r
m01232[c]	9-cis-retinol	C20H30O	C20H30O	0	c
m01233[c]	9-cis-retinoyl-beta-D-glucuronide	C26H36O8	C26H36O8	0	c
m01233[r]	9-cis-retinoyl-beta-D-glucuronide	C26H36O8	C26H36O8	0	r
m01234[c]	9-deoxy-delta12-PGD2	C20H32O4	C20H32O4	0	c
m01235[c]	9-eicosenoic acid	C20H38O2	C20H38O2	0	c			CHEBI:32419;CHEBI:32420
m01235[l]	9-eicosenoic acid	C20H38O2	C20H38O2	0	l			CHEBI:32419;CHEBI:32420
m01235[r]	9-eicosenoic acid	C20H38O2	C20H38O2	0	r			CHEBI:32419;CHEBI:32420
m01235[s]	9-eicosenoic acid	C20H38O2	C20H38O2	0	s			CHEBI:32419;CHEBI:32420
m01236[c]	9-eicosenoyl-CoA	C41H72N7O17P3S	C41H72N7O17P3S	0	c
m01236[m]	9-eicosenoyl-CoA	C41H72N7O17P3S	C41H72N7O17P3S	0	m
m01236[r]	9-eicosenoyl-CoA	C41H72N7O17P3S	C41H72N7O17P3S	0	r
m01237[c]	9-heptadecenoyl-CoA	C38H66N7O17P3S	C38H66N7O17P3S	0	c
m01237[m]	9-heptadecenoyl-CoA	C38H66N7O17P3S	C38H66N7O17P3S	0	m
m01237[r]	9-heptadecenoyl-CoA	C38H66N7O17P3S	C38H66N7O17P3S	0	r
m01238[c]	9-heptadecylenic acid	C17H32O2	C17H32O2	0	c	C16536
m01238[l]	9-heptadecylenic acid	C17H32O2	C17H32O2	0	l	C16536
m01238[r]	9-heptadecylenic acid	C17H32O2	C17H32O2	0	r	C16536
m01238[s]	9-heptadecylenic acid	C17H32O2	C17H32O2	0	s	C16536
m01239[c]	9-HETE	C20H32O3	C20H32O3	0	c
m01240[c]	9-hydroxy-10-O-D-glucuronoside-(12Z)-octadecenoate	C24H42O10	C24H42O10	0	c
m01240[r]	9-hydroxy-10-O-D-glucuronoside-(12Z)-octadecenoate	C24H42O10	C24H42O10	0	r
m01241[c]	9-hydroxybenzo[a]pyrene	C20H12O	C20H12O	0	c	C14556
m01242[c]	9-hydroxybenzo[a]pyrene-4,5-oxide	C20H12O2	C20H12O2	0	c	C14854
m01243[c]	9-hydroxyoctadecadienoate	C18H32O3	C18H32O3	0	c
m01244[c]	9-O-acetylated-GD3	C55H92N3O30R	C55H92N3O30R	0	c
m01244[g]	9-O-acetylated-GD3	C55H92N3O30R	C55H92N3O30R	0	g
m01244[s]	9-O-acetylated-GD3	C55H92N3O30R	C55H92N3O30R	0	s
m01245[c]	9-O-acetylated-GT3	C66H109N4O38R	C66H109N4O38R	0	c
m01245[g]	9-O-acetylated-GT3	C66H109N4O38R	C66H109N4O38R	0	g
m01245[s]	9-O-acetylated-GT3	C66H109N4O38R	C66H109N4O38R	0	s
m01246[c]	9-peroxy-(5Z,7E,11Z,14Z)-eicosatetraenoate	C20H31O4	C20H31O4	0	c
m01247[c]	A2PE	C45H62NO6PR2	C45H62NO6PR2	0	c
m01248[c]	A2PE-H2	C45H64NO6PR2	C45H64NO6PR2	0	c
m01249[c]	acetaldehyde	C2H4O	C2H4O	0	c	C00084		CHEBI:15343
m01249[m]	acetaldehyde	C2H4O	C2H4O	0	m	C00084		CHEBI:15343
m01249[p]	acetaldehyde	C2H4O	C2H4O	0	p	C00084		CHEBI:15343
m01249[r]	acetaldehyde	C2H4O	C2H4O	0	r	C00084		CHEBI:15343
m01249[s]	acetaldehyde	C2H4O	C2H4O	0	s	C00084		CHEBI:15343
m01250[c]	acetamidopropanal	C5H9NO2	C5H9NO2	0	c	C18170
m01250[p]	acetamidopropanal	C5H9NO2	C5H9NO2	0	p	C18170
m01251[c]	acetanilide	C8H9NO	C8H9NO	0	c	C07565		CHEBI:28884
m01252[c]	acetate	C2H4O2	C2H4O2	0	c	C00033		CHEBI:15366;CHEBI:30089
m01252[g]	acetate	C2H4O2	C2H4O2	0	g	C00033		CHEBI:15366;CHEBI:30089
m01252[m]	acetate	C2H4O2	C2H4O2	0	m	C00033		CHEBI:15366;CHEBI:30089
m01252[p]	acetate	C2H4O2	C2H4O2	0	p	C00033		CHEBI:15366;CHEBI:30089
m01252[r]	acetate	C2H4O2	C2H4O2	0	r	C00033		CHEBI:15366;CHEBI:30089
m01252[s]	acetate	C2H4O2	C2H4O2	0	s	C00033		CHEBI:15366;CHEBI:30089
m01253[c]	acetoacetate	C4H6O3	C4H6O3	0	c	C00164		CHEBI:13705;CHEBI:15344
m01253[m]	acetoacetate	C4H6O3	C4H6O3	0	m	C00164		CHEBI:13705;CHEBI:15344
m01253[s]	acetoacetate	C4H6O3	C4H6O3	0	s	C00164		CHEBI:13705;CHEBI:15344
m01254[c]	acetoacetyl-[ACP]	C4H5O2SR	C4H5O2SR	0	c	C05744
m01255[c]	acetoacetyl-CoA	C25H40N7O18P3S	C25H40N7O18P3S	0	c	C00332		CHEBI:15345
m01255[m]	acetoacetyl-CoA	C25H40N7O18P3S	C25H40N7O18P3S	0	m	C00332		CHEBI:15345
m01255[p]	acetoacetyl-CoA	C25H40N7O18P3S	C25H40N7O18P3S	0	p	C00332		CHEBI:15345
m01256[c]	acetone	C3H6O	C3H6O	0	c	C00207		CHEBI:15347
m01256[m]	acetone	C3H6O	C3H6O	0	m	C00207		CHEBI:15347
m01256[s]	acetone	C3H6O	C3H6O	0	s	C00207		CHEBI:15347
m01257[c]	acetyl adenylate	C12H16N5O8P	C12H16N5O8P	0	c	C05993		CHEBI:37666
m01258[c]	acetyl-[ACP]	C2H3OSR	C2H3OSR	0	c	C03939
m01259[c]	acetylcarnosine	C11H16N4O4	C11H16N4O4	0	c
m01260[c]	acetylcholine	C7H16NO2	C7H16NO2	0	c	C01996		CHEBI:15355
m01260[n]	acetylcholine	C7H16NO2	C7H16NO2	0	n	C01996		CHEBI:15355
[truncated: 3,717 more rows]

## Sheet: reactions
Abbreviation	Description	Reaction	GPR	Genes	Proteins	Subsystem	Reversible	Lower bound	Upper bound	Objective	Confidence Score	EC Number	Notes	References
RCR10001	ATP:AMP phosphotransferase	2 m01285[c] <==> m01334[c] + m01371[c]	24184 or 26956 or 29223 or 373541 or 311833 or 102238592 or 24183 or 365985 or 314416 or 309854 or 294521			Purine metabolism	1	-1000	1000	0	1	2.7.4.3		PMID:16798851;PMID:1969292;PMID:211388;PMID:6182143;PMID:6244157
RCR10002	Acetate:CoA ligase (AMP-forming)	m01252[c] + m01371[c] + m01597[c] --> m01261[c] + m01334[c] + m02759[c]	311569			Central carbon metabolism	0	0	1000	0	1	6.2.1.1		PMID:10843999;PMID:11150295;PMID:2884217;PMID:4737256;PMID:5995;PMID10843999;PMID12623130
RCR10003	Acetyl-CoA hydrolase	m01261[c] + m02040[c] --> m01252[c] + m01597[c]	170570			Central carbon metabolism	0	0	1000	0	1	3.1.2.1		PMID:11322891;PMID:12545200;PMID:16951743;PMID:34392;PMID:6151837;PMID:7696329
RCR10004	ATP:AMP phosphotransferase[m]	2 m01285[m] <==> m01334[m] + m01371[m]	24184 or 26956 or 29223 or 373541 or 311833 or 102238592 or 24183 or 365985 or 314416 or 309854 or 294521			Purine metabolism	1	-1000	1000	0	1	2.7.4.3		PMID:16798851;PMID:1969292;PMID:211388;PMID:6182143;PMID:6244157;PMID11485571;PMID195572;PMID8843353;PMID9434148
RCR10005	L-Asparagine:tRNA(Asn) ligase (AMP-forming)	m03065[c] + m01369[c] + m01371[c] --> m02341[c] + m01334[c] + m02759[c]	291556 or 293128			Protein metabolism	0	0	1000	0	1	6.1.1.22
RCR10006	L-Arginine:tRNA(Arg) ligase (AMP-forming)	m03064[c] + m01365[c] + m01371[c] --> m02340[c] + m01334[c] + m02759[c]	287191 or 297969			Protein metabolism	0	0	1000	0	1	6.1.1.19
RCR10007	Beta-galactoside alpha-2,3-sialyltransferase	m01947[g] + m01592[g] --> m02033[g] + m01590[g]	364901			Sphingolipid metabolism	0	0	1000	0	1	2.4.99.-
RCR10008	ATP:NAD+ 2'-phosphotransferase	m02552[n] + m01371[n] --> m01285[n] + m02554[n]	365699 or 100125370			Vitamin B metabolism	0	0	1000	0	1	2.7.1.23		PMID:11594753
RCR10009	L-aspartate:L-glutamine amido-ligase (AMP-forming)	m01370[c] + m01975[c] + m01371[c] + m02040[c] --> m01369[c] + m01974[c] + m01334[c] + m02759[c]	25612			Alanine aspartate and glutamate metabolism	0	0	1000	0	1	6.3.5.4		PMID:4216348
RCR10010	L-serine hydro-lyase	m02896[c] --> m01654[c] + m02040[c]	25044 or 303306 or 360816			Glycine serine and threonine metabolism	0	0	1000	0	1	4.3.1.17;4.3.1.19		PMID:4433562
RCR10011	L-Glutamine:tRNA(Gln) ligase (AMP-forming)	m03068[c] + m01975[c] + m01371[c] --> m02376[c] + m01334[c] + m02759[c]	100911132			Protein metabolism	0	0	1000	0	1	6.1.1.18
RCR10012	L-Leucine:tRNA(Leu) ligase (AMP-forming)	m03073[c] + m02360[c] + m01371[c] --> m02404[c] + m01334[c] + m02759[c]	291624 or 363172			Protein metabolism	0	0	1000	0	1	6.1.1.4
RCR10013	L-proline:tRNA(Pro) ligase (AMP-forming)	m03077[c] + m02770[c] + m01371[c] --> m02415[c] + m01334[c] + m02759[c]	313429 or 289352			Protein metabolism	0	0	1000	0	1	6.1.1.15
RCR10014	L-Threonine:tRNA(Thr) ligase (AMP-forming)	m03079[c] + m02993[c] + m01371[c] --> m02419[c] + m01334[c] + m02759[c]	294810 or 310672 or 308701			Protein metabolism	0	0	1000	0	1	6.1.1.3
RCR10015	diphosphate phosphohydrolase	m02759[p] + m02040[p] --> 2 m02751[p]	310664 or 361663 or 294504 or 310856			Electron transport chain	0	0	1000	0	1	3.6.1.1		PMID:10542310;PMID:16300924
RCR10016	L-Tryptophan decarboxy-lyase	m03089[c] --> m03088[c] + m01596[c]	24311			Aromatic amino acid metabolism	0	0	1000	0	1	4.1.1.28
RCR10017	L-Tryptophan -tRNA(Trp) ligase (AMP-forming)	m03080[c] + m03089[c] + m01371[c] --> m02420[c] + m01334[c] + m02759[c]	314442 or 690654			Protein metabolism	0	0	1000	0	1	6.1.1.2
RCR10018	ATP:CMP phosphotransferase	m01424[c] + m01285[c] <==> m01590[c] + m01371[c]	298410			Nucleotide metabolism	1	-1000	1000	0	1	2.7.4.14;2.7.4.25		PMID:10462544;PMID:11912132;PMID:132087;PMID:7581800;PMID:8867780
RCR10019	L-Alanine:2-oxoglutarate aminotransferase	m01306[c] + m01307[c] <==> m02819[c] + m01974[c]	81670			Alanine aspartate and glutamate metabolism	1	-1000	1000	0	1	2.6.1.2		PMID:15663181;PMID:2088925;PMID:454616
RCR10020	L-threonine acetaldehyde-lyase (glycine-forming)	m02993[c] --> m01249[c] + m01986[c]	688286			Glycine serine and threonine metabolism	0	0	1000	0	1
RCR10021	UDP-N-acetyl-D-glucosamine 4-epimerase	m03110[c] <==> m03111[c]	114860			Carbohydrate metabolism	1	-1000	1000	0	1	5.1.3.7		PMID:11841944;PMID:2820646;PMID:656081
RCR10022	Arachidonate:CoA ligase (AMP-forming)	m01364[c] + m01334[c] + m02759[c] <==> m01362[c] + m01371[c] + m01597[c]	113976 or 171410 or 25288 or 94340 or 117243 or 301120 or 114024 or 65192			Fatty acid metabolism	1	-1000	1000	0	1	6.2.1.3		PMID:8584017;PMID:12525535;PMID:11889465;PMID15292367
RCR10023	palmitoyl-CoA hydrolase	m01364[c] + m02040[c] --> m01362[c] + m01597[c]	26759 or 29725 or 192272 or 681337 or 314304 or 50559 or 299193			Fatty acid metabolism	0	0	1000	0	1	3.1.2.2
RCR10024	ATP:D-mannose 6-phosphotransferase	m02453[c] + m01371[c] --> m02455[c] + m01285[c]	25059 or 25060 or 25058 or 100364027			Carbohydrate metabolism	0	0	1000	0	1	2.7.1.1		PMID:16906315;PMID:7061426;PMID:7150652;PMID:8717435
RCR10025	long-chain-fatty-acid-CoA ligase	m00119[c] + m01334[c] + m02759[c] <==> m01291[c] + m01371[c] + m01597[c]	113976 or 171410 or 25288 or 94340 or 117243 or 301120 or 114024 or 65192			Fatty acid metabolism	1	-1000	1000	0	1	6.2.1.3		PMID15292367
RCR10026	palmitoyl-CoA hydrolase[c]	m00119[c] + m02040[c] --> m01291[c] + m01597[c]	26759 or 29725 or 192272 or 681337 or 314304 or 50559 or 299193			Fatty acid metabolism	0	0	1000	0	1	3.1.2.2
RCR10027	ATP:dCMP phosphotransferase	m01643[n] + m01285[n] <==> m01644[n] + m01371[n]	298410			Nucleotide metabolism	1	-1000	1000	0	1	2.7.4.14		PMID10462544;PMID11912132
RCR10028	citrate hydroxymutase	m01587[c] <==> m02183[c]	50655 or 64831			Central carbon metabolism	1	-1000	1000	0	1	4.2.1.3		PMID:15263083;PMID:16511074;PMID10419470;PMID17244191;PMID17244192
RCR10029	long-chain-fatty-acid-CoA ligase[c]	m00128[c] + m01371[c] + m01597[c] <==> m00129[c] + m01334[c] + m02759[c]	113976 or 171410 or 25288 or 94340 or 117243 or 301120 or 114024 or 65192			Fatty acid metabolism	1	-1000	1000	0	1	6.2.1.3
RCR10030	long-chain-fatty-acid---CoA ligase	m00117[c] + m01371[c] + m01597[c] <==> m00118[c] + m01334[c] + m02759[c]	113976 or 171410 or 25288 or 94340 or 117243 or 301120 or 114024 or 65192			Fatty acid metabolism	1	-1000	1000	0	1	6.2.1.3
RCR10031	long-chain-fatty-acid---CoA ligase[c]	m01191[c] + m01334[c] + m02759[c] <==> m01197[c] + m01371[c] + m01597[c]	113976 or 171410 or 25288 or 94340 or 117243 or 301120 or 114024 or 65192			Fatty acid metabolism	1	-1000	1000	0	1	6.2.1.3
RCR10032	acyl-CoA synthetase	m00003[c] + m01371[c] + m01597[c] <==> m00004[c] + m01334[c] + m02759[c]	113976 or 171410 or 25288 or 94340 or 117243 or 301120 or 114024 or 65192			Fatty acid metabolism	1	-1000	1000	0	1	6.2.1.3
RCR10033	fatty acid thiokinase (long chain)	m01237[c] + m01334[c] + m02759[c] <==> m01238[c] + m01371[c] + m01597[c]	113976 or 171410 or 25288 or 94340 or 117243 or 301120 or 114024 or 65192			Fatty acid metabolism	1	-1000	1000	0	1	6.2.1.3
RCR10034	acyl-activating enzyme	m00019[c] + m01371[c] + m01597[c] <==> m00020[c] + m01334[c] + m02759[c]	113976 or 171410 or 25288 or 94340 or 117243 or 301120 or 114024 or 65192			Fatty acid metabolism	1	-1000	1000	0	1	6.2.1.3
RCR10035	palmitoyl-CoA synthase	m01586[c] + m01334[c] + m02759[c] <==> m01585[c] + m01371[c] + m01597[c]	113976 or 171410 or 25288 or 94340 or 117243 or 301120 or 114024 or 65192			Fatty acid metabolism	1	-1000	1000	0	1	6.2.1.3		PMID15292367
RCR10036	lignoceroyl-CoA synthase	m00020[c] + m01334[c] + m02759[c] <==> m00115[c] + m01371[c] + m01597[c]	113976 or 171410 or 25288 or 94340 or 117243 or 301120 or 114024 or 65192			Fatty acid metabolism	1	-1000	1000	0	1	6.2.1.3
RCR10037	arachidonyl-CoA synthetase	m00104[c] + m01371[c] + m01597[c] <==> m00106[c] + m01334[c] + m02759[c]	113976 or 171410 or 25288 or 94340 or 117243 or 301120 or 114024 or 65192			Fatty acid metabolism	1	-1000	1000	0	1	6.2.1.3		PMID15292367
RCR10038	acyl coenzyme A synthetase	m00017[c] + m01371[c] + m01597[c] <==> m00018[c] + m01334[c] + m02759[c]	113976 or 171410 or 25288 or 94340 or 117243 or 301120 or 114024 or 65192			Fatty acid metabolism	1	-1000	1000	0	1	6.2.1.3
RCR10039	acyl-CoA ligase	m00007[c] + m01334[c] + m02759[c] <==> m01584[c] + m01371[c] + m01597[c]	113976 or 171410 or 25288 or 94340 or 117243 or 301120 or 114024 or 65192			Fatty acid metabolism	1	-1000	1000	0	1	6.2.1.3
RCR10040	palmitoyl coenzyme A synthetase	m01235[c] + m01371[c] + m01597[c] <==> m01236[c] + m01334[c] + m02759[c]	113976 or 171410 or 25288 or 94340 or 117243 or 301120 or 114024 or 65192			Fatty acid metabolism	1	-1000	1000	0	1	6.2.1.3
RCR10041	thiokinase	m00123[c] + m01334[c] + m02759[c] <==> m01207[c] + m01371[c] + m01597[c]	113976 or 171410 or 25288 or 94340 or 117243 or 301120 or 114024 or 65192			Fatty acid metabolism	1	-1000	1000	0	1	6.2.1.3
RCR10042	palmitoyl-CoA ligase	m00016[c] + m01334[c] + m02759[c] <==> m01583[c] + m01371[c] + m01597[c]	113976 or 171410 or 25288 or 94340 or 117243 or 301120 or 114024 or 65192			Fatty acid metabolism	1	-1000	1000	0	1	6.2.1.3
RCR10043	acyl-coenzyme A ligase	m00006[c] + m01334[c] + m02759[c] <==> m01582[c] + m01371[c] + m01597[c]	113976 or 171410 or 25288 or 94340 or 117243 or 301120 or 114024 or 65192			Fatty acid metabolism	1	-1000	1000	0	1	6.2.1.3
RCR10044	fatty acid CoA ligase	m00135[c] + m01371[c] + m01597[c] <==> m00134[c] + m01334[c] + m02759[c]	113976 or 171410 or 25288 or 94340 or 117243 or 301120 or 114024 or 65192			Fatty acid metabolism	1	-1000	1000	0	1	6.2.1.3		PMID15292367
RCR10045	long-chain fatty acyl coenzyme A synthetase	m00114[c] + m01371[c] + m01597[c] <==> m00113[c] + m01334[c] + m02759[c]	113976 or 171410 or 25288 or 94340 or 117243 or 301120 or 114024 or 65192			Fatty acid metabolism	1	-1000	1000	0	1	6.2.1.3		PMID:9784915;PMID15292367
RCR10046	oleoyl-CoA synthetase	m00010[c] + m01371[c] + m01597[c] <==> m00012[c] + m01334[c] + m02759[c]	113976 or 171410 or 25288 or 94340 or 117243 or 301120 or 114024 or 65192			Fatty acid metabolism	1	-1000	1000	0	1	6.2.1.3
RCR10047	stearoyl-CoA synthetase	m00341[c] + m01371[c] + m01597[c] <==> m00343[c] + m01334[c] + m02759[c]	113976 or 171410 or 25288 or 94340 or 117243 or 301120 or 114024 or 65192			Fatty acid metabolism	1	-1000	1000	0	1	6.2.1.3
RCR10048	long chain fatty acyl-CoA synthetase	m00260[c] + m01371[c] + m01597[c] <==> m00262[c] + m01334[c] + m02759[c]	113976 or 171410 or 25288 or 94340 or 117243 or 301120 or 114024 or 65192			Fatty acid metabolism	1	-1000	1000	0	1	6.2.1.3
RCR10049	long-chain acyl CoA synthetase	m00315[c] + m01371[c] + m01597[c] <==> m00317[c] + m01334[c] + m02759[c]	113976 or 171410 or 25288 or 94340 or 117243 or 301120 or 114024 or 65192			Fatty acid metabolism	1	-1000	1000	0	1	6.2.1.3
RCR10050	LCFA synthetase	m00132[c] + m01371[c] + m01597[c] <==> m00131[c] + m01334[c] + m02759[c]	113976 or 171410 or 25288 or 94340 or 117243 or 301120 or 114024 or 65192			Fatty acid metabolism	1	-1000	1000	0	1	6.2.1.3		PMID15292367
RCR10051	pristanoyl-CoA synthetase	m00111[c] + m01371[c] + m01597[c] <==> m00110[c] + m01334[c] + m02759[c]	113976 or 171410 or 25288 or 94340 or 117243 or 301120 or 114024 or 65192			Fatty acid metabolism	1	-1000	1000	0	1	6.2.1.3		PMID:10479480;PMID:9784915;PMID15292367
RCR10052	ACS3	m00094[c] + m01371[c] + m01597[c] <==> m00093[c] + m01334[c] + m02759[c]	113976 or 171410 or 25288 or 94340 or 117243 or 301120 or 114024 or 65192			Fatty acid metabolism	1	-1000	1000	0	1	6.2.1.3		PMID15292367
RCR10053	long-chain acyl-CoA synthetase I	m00008[c] + m01371[c] + m01597[c] <==> m00009[c] + m01334[c] + m02759[c]	113976 or 171410 or 25288 or 94340 or 117243 or 301120 or 114024 or 65192			Fatty acid metabolism	1	-1000	1000	0	1	6.2.1.3
RCR10054	long-chain acyl-CoA synthetase II	m00021[c] + m01371[c] + m01597[c] <==> m00023[c] + m01334[c] + m02759[c]	113976 or 171410 or 25288 or 94340 or 117243 or 301120 or 114024 or 65192			Fatty acid metabolism	1	-1000	1000	0	1	6.2.1.3
RCR10055	fatty acyl-coenzyme A synthetase	m00264[c] + m01334[c] + m02759[c] <==> m00265[c] + m01371[c] + m01597[c]	113976 or 171410 or 25288 or 94340 or 117243 or 301120 or 114024 or 65192			Fatty acid metabolism	1	-1000	1000	0	1	6.2.1.3
RCR10056	long-chain fatty-acyl-CoA hydrolase	m00129[c] + m02040[c] --> m00128[c] + m01597[c]	26759 or 29725 or 192272 or 681337 or 314304 or 50559 or 299193			Fatty acid metabolism	0	0	1000	0	1	3.1.2.2
RCR10057	palmitoyl coenzyme A hydrolase	m00118[c] + m02040[c] --> m00117[c] + m01597[c]	26759 or 29725 or 192272 or 681337 or 314304 or 50559 or 299193			Fatty acid metabolism	0	0	1000	0	1	3.1.2.2
RCR10058	palmitoyl thioesterase	m01191[c] + m02040[c] --> m01197[c] + m01597[c]	26759 or 29725 or 192272 or 681337 or 314304 or 50559 or 299193			Fatty acid metabolism	0	0	1000	0	1	3.1.2.2
RCR10059	palmitoyl-CoA deacylase	m00004[c] + m02040[c] --> m00003[c] + m01597[c]	26759 or 29725 or 192272 or 681337 or 314304 or 50559 or 299193			Fatty acid metabolism	0	0	1000	0	1	3.1.2.2
RCR10060	palmityl thioesterase	m01237[c] + m02040[c] --> m01238[c] + m01597[c]	26759 or 29725 or 192272 or 681337 or 314304 or 50559 or 299193			Fatty acid metabolism	0	0	1000	0	1	3.1.2.2
RCR10061	palmityl-CoA deacylase	m00020[c] + m02040[c] --> m00019[c] + m01597[c]	26759 or 29725 or 192272 or 681337 or 314304 or 50559 or 299193			Fatty acid metabolism	0	0	1000	0	1	3.1.2.2
RCR10062	fatty acyl thioesterase I	m01586[c] + m02040[c] --> m01585[c] + m01597[c]	26759 or 29725 or 192272 or 681337 or 314304 or 50559 or 299193			Fatty acid metabolism	0	0	1000	0	1	3.1.2.2
RCR10063	palmityl thioesterase I	m00116[c] + m02040[c] --> m00115[c] + m01597[c]	26759 or 29725 or 192272 or 681337 or 314304 or 50559 or 299193			Fatty acid metabolism	0	0	1000	0	1	3.1.2.2
RCR10064	long-chain fatty-acyl-CoA hydrolase[c]	m00106[c] + m02040[c] --> m00104[c] + m01597[c]	26759 or 29725 or 192272 or 681337 or 314304 or 50559 or 299193			Fatty acid metabolism	0	0	1000	0	1	3.1.2.2
RCR10065	palmitoyl coenzyme A hydrolase[c]	m00018[c] + m02040[c] --> m00017[c] + m01597[c]	26759 or 29725 or 192272 or 681337 or 314304 or 50559 or 299193			Fatty acid metabolism	0	0	1000	0	1	3.1.2.2
RCR10066	palmitoyl thioesterase[c]	m00007[c] + m02040[c] --> m01584[c] + m01597[c]	26759 or 29725 or 192272 or 681337 or 314304 or 50559 or 299193			Fatty acid metabolism	0	0	1000	0	1	3.1.2.2
RCR10067	palmitoyl-CoA deacylase[c]	m01236[c] + m02040[c] --> m01235[c] + m01597[c]	26759 or 29725 or 192272 or 681337 or 314304 or 50559 or 299193			Fatty acid metabolism	0	0	1000	0	1	3.1.2.2
RCR10068	palmityl thioesterase[c]	m00123[c] + m02040[c] --> m01207[c] + m01597[c]	26759 or 29725 or 192272 or 681337 or 314304 or 50559 or 299193			Fatty acid metabolism	0	0	1000	0	1	3.1.2.2
RCR10069	palmityl-CoA deacylase[c]	m00016[c] + m02040[c] --> m01583[c] + m01597[c]	26759 or 29725 or 192272 or 681337 or 314304 or 50559 or 299193			Fatty acid metabolism	0	0	1000	0	1	3.1.2.2
RCR10070	fatty acyl thioesterase I[c]	m00006[c] + m02040[c] --> m01582[c] + m01597[c]	26759 or 29725 or 192272 or 681337 or 314304 or 50559 or 299193			Fatty acid metabolism	0	0	1000	0	1	3.1.2.2
RCR10071	palmityl thioesterase I[c]	m00134[c] + m02040[c] --> m00135[c] + m01597[c]	26759 or 29725 or 192272 or 681337 or 314304 or 50559 or 299193			Fatty acid metabolism	0	0	1000	0	1	3.1.2.2
RCR10072	RCR10072[c]	m00113[c] + m02040[c] --> m00114[c] + m01597[c]	26759 or 29725 or 192272 or 681337 or 314304 or 50559 or 299193			Fatty acid metabolism	0	0	1000	0	1	3.1.2.2
RCR10073	RCR10073[c]	m00012[c] + m02040[c] --> m00010[c] + m01597[c]	26759 or 29725 or 192272 or 681337 or 314304 or 50559 or 299193			Fatty acid metabolism	0	0	1000	0	1	3.1.2.2
RCR10074	RCR10074[c]	m00343[c] + m02040[c] --> m00341[c] + m01597[c]	26759 or 29725 or 192272 or 681337 or 314304 or 50559 or 299193			Fatty acid metabolism	0	0	1000	0	1	3.1.2.2
RCR10075	RCR10075[c]	m00262[c] + m02040[c] --> m00260[c] + m01597[c]	26759 or 29725 or 192272 or 681337 or 314304 or 50559 or 299193			Fatty acid metabolism	0	0	1000	0	1	3.1.2.2
RCR10076	RCR10076[c]	m00317[c] + m02040[c] --> m00315[c] + m01597[c]	26759 or 29725 or 192272 or 681337 or 314304 or 50559 or 299193			Fatty acid metabolism	0	0	1000	0	1	3.1.2.2
RCR10077	RCR10077[c]	m00131[c] + m02040[c] --> m00132[c] + m01597[c]	26759 or 29725 or 192272 or 681337 or 314304 or 50559 or 299193			Fatty acid metabolism	0	0	1000	0	1	3.1.2.2
RCR10078	RCR10078[c]	m00110[c] + m02040[c] --> m00111[c] + m01597[c]	26759 or 29725 or 192272 or 681337 or 314304 or 50559 or 299193			Fatty acid metabolism	0	0	1000	0	1	3.1.2.2
RCR10079	RCR10079[c]	m00093[c] + m02040[c] --> m00094[c] + m01597[c]	26759 or 29725 or 192272 or 681337 or 314304 or 50559 or 299193			Fatty acid metabolism	0	0	1000	0	1	3.1.2.2
RCR10080	RCR10080[c]	m00009[c] + m02040[c] --> m00008[c] + m01597[c]	26759 or 29725 or 192272 or 681337 or 314304 or 50559 or 299193			Fatty acid metabolism	0	0	1000	0	1	3.1.2.2
RCR10081	RCR10081[c]	m00023[c] + m02040[c] --> m00021[c] + m01597[c]	26759 or 29725 or 192272 or 681337 or 314304 or 50559 or 299193			Fatty acid metabolism	0	0	1000	0	1	3.1.2.2
RCR10082	RCR10082[c]	m00264[c] + m02040[c] --> m00265[c] + m01597[c]	26759 or 29725 or 192272 or 681337 or 314304 or 50559 or 299193			Fatty acid metabolism	0	0	1000	0	1	3.1.2.2
RCR10083	(S)-Lactate:NAD+ oxidoreductase	m02819[p] + m02553[p] + m02039[p] <==> m02403[p] + m02552[p]	24534 or 29634 or 691172 or 369018			Central carbon metabolism	1	-1000	1000	0	1	1.1.1.27		PMID:12042361;PMID:17045662;PMID:7449128;PMID:9927705
RCR10084	ATP:adenosine 5'-phosphotransferase	m01280[c] + m01371[c] --> m01334[c] + m01285[c]	25368 or 79127			Purine metabolism	0	0	1000	0	1	2.7.1.20;2.7.1.74		PMID:132087;PMID:3030413;PMID:6315069
RCR10085	UDP-glucuronate glucuronohydrolase	m03109[c] + m02040[c] --> m01973[c] + m03106[c]	246232			Vitamin C metabolism	0	0	1000	0	1	4.1.1.35
RCR10086	dATP:D-mannose 6-phosphotransferase	m01642[c] + m02453[c] --> m02455[c] + m01637[c]	25059 or 25060 or 25058 or 100364027			Purine metabolism	0	0	1000	0	1	2.7.1.1		PMID:16906315;PMID:7061426;PMID:7150652;PMID:8717435
RCR10087	ATP:dADP phosphotransferase	m01642[c] + m01285[c] <==> m01637[c] + m01371[c]	191575 or 83782 or 171566 or 58964 or 685679 or 688903 or 85269			Purine metabolism	1	-1000	1000	0	1	2.7.4.6		PMID:11768308
RCR10088	cytidylate kinase (CMP,dATP),nuclear	m01424[c] + m01637[c] <==> m01642[c] + m01590[c]	298410			Nucleotide metabolism	1	-1000	1000	0	1	2.7.4.14		PMID10462544;PMID11912132
RCR10089	L-glutamine amidohydrolase	m01975[c] + m02040[c] --> m02578[c] + m01974[c]	192268			Alanine aspartate and glutamate metabolism	0	0	1000	0	1	3.5.1.2;3.5.1.38		PMID:11015561;PMID:11130979;PMID:17267261;PMID:6704422
RCR10090	L-Asparagine amidohydrolase	m01369[c] + m02040[c] --> m01370[c] + m02578[c]	246307 or 246266			Alanine aspartate and glutamate metabolism	0	0	1000	0	1	3.5.1.1;3.5.1.38		PMID:4311065;PMID:4894450
RCR10091	L-glutamate 1-carboxy-lyase (4-aminobutanoate-forming)	m01974[c] --> m00970[c] + m01596[c]	24379 or 24380			Alanine aspartate and glutamate metabolism	0	0	1000	0	1	4.1.1.15
RCR10092	L-Arginine iminohydrolase	m01365[c] + m02040[c] --> m01588[c] + m02578[c]				Arginine and proline metabolism	0	0	1000	0	1	3.5.3.6
RCR10093	L-serine ammonia-lyase	m02896[c] --> m02819[c] + m02578[c]	25044 or 303306 or 360816			Glycine serine and threonine metabolism	0	0	1000	0	1	4.3.1.17;4.3.1.19		PMID:4433562
RCR10094	2-Aminoacrylate aminohydrolase	m01654[c] + m02040[c] --> m02819[c] + m02578[c]	25044 or 303306 or 360816			Glycine serine and threonine metabolism	0	0	1000	0	1	4.3.1.17;4.3.1.19		PMID:15618015;PMID:4156834
RCR10095	L-aspartate 1-carboxy-lyase (beta-alanine-forming)	m01370[c] --> m01383[c] + m01596[c]	24379 or 24380			beta-Alanine metabolism	0	0	1000	0	1	4.1.1.11;4.1.1.15		PMID:10411630;PMID:12887686;PMID:1516767;PMID:2878977;PMID:6387051;PMID:6707648
RCR10096	ATP:dUDP phosphotransferase	m01756[c] + m01285[c] <==> m01754[c] + m01371[c]	191575 or 83782 or 171566 or 58964 or 685679 or 688903 or 85269			Pyrimidine metabolism	1	-1000	1000	0	1	2.7.4.6		PMID:132087
RCR10097	carbonate hydro-lyase (carbon-dioxide-forming)	m01596[m] + m02040[m] --> m02046[m] + m02039[m]	54233 or 302669			Arginine and proline metabolism	0	0	1000	0	1	4.2.1.1		PMID10677517
RCR10098	fatty-acid synthase	m00184[c] + m02774[c] --> m02773[c] + m01597[c]	50671			Fatty acid metabolism	0	0	1000	0	1	2.3.1.85
RCR10099	ATP:dGDP phosphotransferase	m01688[c] + m01285[c] <==> m01680[c] + m01371[c]	191575 or 83782 or 171566 or 58964 or 685679 or 688903 or 85269			Purine metabolism	1	-1000	1000	0	1	2.7.4.6		PMID:11768308;PMID:2546816;PMID:2832402;UNIPROT:P15531
RCR10100	nucleoside-diphosphate kinase	m01753[c] + m01637[c] <==> m01747[c] + m01642[c]	191575 or 83782 or 171566 or 58964 or 685679 or 688903 or 85269			Pyrimidine metabolism	1	-1000	1000	0	1	2.7.4.6		PMID:3026468;PMID3026468
RCR10101	ATP:dTDP phosphotransferase	m01753[c] + m01285[c] <==> m01747[c] + m01371[c]	191575 or 83782 or 171566 or 58964 or 685679 or 688903 or 85269			Pyrimidine metabolism	1	-1000	1000	0	1	2.7.4.6		PMID:132087
RCR10102	cytidylate kinase (CMP,dGTP),nuclear	m01680[c] + m01424[c] <==> m01688[c] + m01590[c]	298410			Nucleotide metabolism	1	-1000	1000	0	1	2.7.4.14		PMID10462544;PMID11912132
RCR10103	L-aspartate ammonia-lyase (fumarate-forming)	m01370[c] --> m01862[c] + m02578[c]	24368			Alanine aspartate and glutamate metabolism	0	0	1000	0	1	4.3.1.1
RCR10104	L-threonine ammonia-lyase (2-oxobutanoate-forming)	m02993[c] --> m00671[c] + m02578[c]	25044 or 360816			Glycine serine and threonine metabolism	0	0	1000	0	1	4.3.1.19
RCR10105	(S)-malate hydro-lyase (fumarate-forming)	m01862[c] + m02040[c] <==> m02439[c]	24368			Central carbon metabolism	1	-1000	1000	0	1	4.2.1.2		PMID:7287666
RCR10106	citrate hydro-lyase (cis-aconitate-forming)	m01580[m] + m02040[m] <==> m01587[m]	50655 or 79250			Central carbon metabolism	1	-1000	1000	0	1	4.2.1.3		PMID:15263083;PMID:16511074
RCR10107	Acetyl-CoA:choline O-acetyltransferase	m01513[c] + m01261[c] --> m01260[c] + m01597[c]	290567			Glycerolipid metabolism	0	0	1000	0	1	2.3.1.6		PMID10861222
RCR10108	Acetylcholine aectylhydrolase	m01260[c] + m02040[c] --> m01513[c] + m01252[c]	65036 or 83817			Glycerolipid metabolism	0	0	1000	0	1	3.1.1.7;3.1.1.8
RCR10109	ATP:UMP phosphotransferase	m03106[c] + m01285[c] <==> m03114[c] + m01371[c]	298410			Pyrimidine metabolism	1	-1000	1000	0	1	2.7.4.14;2.7.4.4		PMID:10462544;PMID:11912132;PMID:132087;PMID:7581800;PMID:8867780
RCR10110	orotidine-5'-phosphate carboxy-lyase (UMP-forming)	m02660[c] --> m03114[c] + m01596[c]	288051			Pyrimidine metabolism	0	0	1000	0	1	4.1.1.23		PMID:856170;PMID:8631878;PMID:9042911
RCR10111	ATP diphosphohydrolase (diphosphate-forming)	m01371[m] + m02040[m] --> m01334[m] + m02759[m]	311422			Nucleotide metabolism	0	0	1000	0	1	3.6.1.19
RCR10112	UMP kinase (dATP)	m01637[c] + m03106[c] <==> m01642[c] + m03114[c]	298410			Nucleotide metabolism	1	-1000	1000	0	1	2.7.4.14		PMID10462544;PMID11912132
RCR10113	UMP kinase (dATP),nuclear	m01637[n] + m03106[n] <==> m01642[n] + m03114[n]	298410			Nucleotide metabolism	1	-1000	1000	0	1	2.7.4.14		PMID10462544;PMID11912132
RCR10114	UMP kinase (dGTP)	m01680[c] + m03106[c] <==> m01688[c] + m03114[c]	298410			Nucleotide metabolism	1	-1000	1000	0	1	2.7.4.14		PMID10462544;PMID11912132
RCR10115	ATP:UMP phosphotransferase[n]	m03106[n] + m01285[n] <==> m03114[n] + m01371[n]	298410			Nucleotide metabolism	1	-1000	1000	0	1	2.7.4.14		PMID10462544;PMID11912132
RCR10116	ATP:dADP phosphotransferase[n]	m01642[n] + m01285[n] <==> m01637[n] + m01371[n]	191575 or 83782			Nucleotide metabolism	1	-1000	1000	0	1	2.7.4.6		PMID7050910
RCR10117	cytidylate kinase (dCMP,UTP)	m01643[n] + m01637[n] <==> m01644[n] + m01642[n]	298410			Nucleotide metabolism	1	-1000	1000	0	1	2.7.4.14		PMID10462544;PMID11912132
RCR10118	L-Aspartate:2-oxoglutarate aminotransferase	m01370[c] + m01306[c] <==> m02633[c] + m01974[c]	24401 or 306540			Alanine aspartate and glutamate metabolism	1	-1000	1000	0	1	2.6.1.1		PMID:3207426;PMID:7499788;PMID:7719646
RCR10119	Propionyladenylate:CoA propionyltransferase	m02774[m] + m01334[m] <==> m02775[m] + m01597[m]	311569 or 296259 or 314800			Valine leucine and isoleucine metabolism	1	-1000	1000	0	1	6.2.1.1;6.2.1.17		PMID:10843999;PMID:1924964;PMID:2009071;PMID:2884217;PMID:7341659
RCR10120	L-Isoleucine:tRNA(Ile) ligase (AMP-forming)	m03072[c] + m02184[c] + m01371[c] --> m02401[c] + m01334[c] + m02759[c]	306804 or 364070			Protein metabolism	0	0	1000	0	1	6.1.1.5
RCR10121	diphosphate phosphohydrolase[m]	m02759[m] + m02040[m] --> 2 m02751[m]	310664 or 361663 or 294504 or 310856			Electron transport chain	0	0	1000	0	1	3.6.1.1		PMID:10542310;PMID:16300924
RCR10122	leukotriene-C4 hydrolase	m02366[r] + m02040[r] <==> m02418[r] + m01974[r]	156275 or 408206 or 116568 or 29566			Eicosanoid metabolism	1	-1000	1000	0	1	2.3.2.2
RCR10123	ATP:1-Phosphatidyl-1D-myo-inositol 4-phosphotransferase	m02750[n] + m01371[n] --> m00553[n] + m01285[n]	114554 or 305419 or 64161 or 81747			Inositol phosphate metabolism	0	0	1000	0	1
RCR10124	RCR10124[c]	m00350[c] <==> m02833[c]				Vitamin A metabolism	1	-1000	1000	0	1			PMID:9647871
RCR10126	ATP:GDP phosphotransferase	m02034[c] + m01285[c] <==> m01948[c] + m01371[c]	191575 or 83782 or 171566 or 58964 or 685679 or 688903 or 85269			Purine metabolism	1	-1000	1000	0	1	2.7.4.6		PMID:11768308
RCR10127	ATP:dCDP phosphotransferase	m01645[c] + m01285[c] <==> m01643[c] + m01371[c]	191575 or 83782 or 171566 or 58964 or 685679 or 688903 or 85269			Pyrimidine metabolism	1	-1000	1000	0	1	2.7.4.6		PMID:11768308;PMID:2546816;PMID:2832402;UNIPROT:P15531
RCR10128	dCTP aminohydrolase	m01645[c] + m02040[c] --> m01756[c] + m02578[c]				Pyrimidine metabolism	0	0	1000	0	1	3.5.4.13
RCR10129	cytidylate kinase (CMP)(GTP)	m01424[c] + m01948[c] <==> m02034[c] + m01590[c]	298410			Nucleotide metabolism	1	-1000	1000	0	1	2.7.4.14		PMID10215863
RCR10130	adentylate kinase (GTP)	m01948[c] + m01285[c] <==> m02034[c] + m01334[c]	365985			Nucleotide metabolism	1	-1000	1000	0	1	2.7.4.3		PMID9434148
RCR10131	UMP kinase (GTP)	m01948[c] + m03106[c] <==> m02034[c] + m03114[c]	298410			Nucleotide metabolism	1	-1000	1000	0	1	2.7.4.14		PMID10462544;PMID11912132
RCR10132	UMP kinase (dCTP)	m01643[c] + m03106[c] <==> m01645[c] + m03114[c]	298410			Nucleotide metabolism	1	-1000	1000	0	1	2.7.4.14		PMID10462544;PMID11912132
RCR10133	ATP:UMP phosphotransferase[m]	m03106[m] + m01285[m] <==> m03114[m] + m01371[m]	314004			Nucleotide metabolism	1	-1000	1000	0	1	2.7.4.14		PMID17999954
RCR10134	ATP:UDP phosphotransferase	m03130[m] + m01285[m] <==> m03106[m] + m01371[m]	171566 or 191575 or 58964 or 685679 or 688903 or 83782 or 85269			Nucleotide metabolism	1	-1000	1000	0	1	2.7.4.6		PMID9099850
RCR10135	ATP:CMP phosphotransferase[n]	m01424[n] + m01285[n] <==> m01590[n] + m01371[n]	298410			Nucleotide metabolism	1	-1000	1000	0	1	2.7.4.14		PMID10462544;PMID11912132
RCR10136	cytidylate kinase (CMP,dCTP)	m01424[n] + m01637[n] <==> m01642[n] + m01590[n]	298410			Nucleotide metabolism	1	-1000	1000	0	1	2.7.4.14		PMID10462544;PMID11912132
RCR10137	cytidylate kinase (CMP,dCTP),nuclear	m01424[c] + m01643[c] <==> m01645[c] + m01590[c]	298410			Nucleotide metabolism	1	-1000	1000	0	1	2.7.4.14		PMID10462544;PMID11912132
RCR10138	dTTP:alpha-D-glucose-1-phosphate thymidylyltransferase	m01967[c] + m01753[c] --> m01751[c] + m02759[c]				Carbohydrate metabolism	0	0	1000	0	1
RCR10139	dheas intracellular transport	m01699[c] + m01802[c] --> m01430[c] + m01803[c]	314438 or 58970			Sphingolipid metabolism	0	0	1000	0	1			PMID9188692
RCR10140	ATP:1-phosphatidyl-1D-myo-inositol-4-phosphate 5-phosphotransferase	m00553[c] + m01371[c] --> m02736[c] + m01285[c]	314641 or 309419 or 365865 or 687758			Inositol phosphate metabolism	0	0	1000	0	1	2.7.1.68
RCR10141	ATP:1-phosphatidyl-1D-myo-inositol-5-phosphate 4-phosphotransferase	m00554[c] + m01371[c] --> m02736[c] + m01285[c]	140607 or 89812 or 116723			Inositol phosphate metabolism	0	0	1000	0	1	2.7.1.149		PMID:9356448;PMID:7567999;PMID:11756679;PMID:9295334;PMID:7556092
RCR10142	4a-hydroxytetrahydrobiopterin hydro-lyase	m00965[c] --> m01698[c] + m02040[c]	29700 or 685729			Aromatic amino acid metabolism	0	0	1000	0	1	4.2.1.96		PMID10727395
RCR10143	RCR10143[r]	m00350[r] <==> m02833[r]				Vitamin A metabolism	1	-1000	1000	0	1			PMID:9647871
RCR10144	Acetate:CoA ligase (AMP-forming)[m]	m01252[m] + m01371[m] + m01597[m] --> m01261[m] + m01334[m] + m02759[m]	296259 or 314800			Central carbon metabolism	0	0	1000	0	1	6.2.1.1		PMID:10843999;PMID:11150295;PMID:2884217;PMID:4737256;PMID:5995;PMID11150295;PMID4326157
RCR10145	ATP:D-glucose 6-phosphotransferase	m01965[c] + m01371[c] --> m01968[c] + m01285[c]	24385 or 25059 or 25060 or 25058 or 315722 or 100364027			Central carbon metabolism	0	0	1000	0	1	2.7.1.1;2.7.1.2;2.7.1.147		PMID:16906315;PMID:7061426;PMID:7150652;PMID:8717435
RCR10146	alpha-D-glucose 1,6-phosphomutase	m01967[c] <==> m01968[c]	679990 or 24645 or 289632			Central carbon metabolism	1	-1000	1000	0	1	5.4.2.2;5.4.2.5;5.4.2.6;5.2.2.2		PMID:600270;PMID4829444
RCR10147	D-mannose 6-phosphate 1,6-phosphomutase	m02455[c] --> m02454[c]	300089 or 302915 or 300088			Carbohydrate metabolism	0	0	1000	0	1	5.4.2.8		PMID:10593562;PMID:12889654;PMID:15361947
RCR10148	GDP-L-fucose:NADP+ 4-oxidoreductase (3,5-epimerizing)	m01949[c] + m02553[c] + m02039[c] --> m01950[c] + m02552[c]	300036			Carbohydrate metabolism	0	0	1000	0	1	1.1.1.271		PMID:10410995;PMID:2428310;PMID:9603974;PMID10410995;PMID2428310;PMID9603974
RCR10149	Acetaldehyde:NAD+ oxidoreductase	m01249[c] + m02552[c] + m02040[c] --> m01252[c] + m02553[c] + m02039[c]	25375 or 266603 or 309147 or 688778			Central carbon metabolism	0	0	1000	0	1	1.2.1.4;1.2.1.5		PMID:11790142;PMID:2060039;PMID:2549038;PMID:4387261;PMID:8155713;PMID:8328987;PMID12616643
RCR10150	Acetyl-CoA hydrolase[m]	m01261[m] + m02040[m] --> m01252[m] + m01597[m]	170570			Central carbon metabolism	0	0	1000	0	1	3.1.2.1		PMID:11322891;PMID:12545200;PMID:16951743;PMID:34392;PMID:6151837;PMID:7696329
RCR10151	alcohol dehydrogenase (D-1,2-propanediol)	m02771[c] + m02552[c] --> m01715[c] + m02553[c] + m02039[c]	100145871 or 171178 or 362474 or 310903 or 29646 or 24172 or 291403			Central carbon metabolism	0	0	1000	0	1
RCR10152	2-Hydroxybutyrate:NAD+ oxidoreductase	m00648[c] + m02552[c] <==> m00671[c] + m02553[c] + m02039[c]	24534 or 29634 or 691172 or 369018			Central carbon metabolism	1	-1000	1000	0	1	1.1.1.27		PMID10108;PMID21765
RCR10153	dATP:D-glucose 6-phosphotransferase	m01642[c] + m01965[c] --> m01968[c] + m01637[c]	25059 or 25060 or 25058 or 100364027			Purine metabolism	0	0	1000	0	1	2.7.1.1		PMID:16906315;PMID:7061426;PMID:7150652;PMID:8717435
RCR10154	ATP:dADP phosphotransferase[m]	m01642[m] + m01285[m] --> m01637[m] + m01371[m]	191575 or 83782 or 171566 or 58964 or 685679 or 688903 or 85269			Purine metabolism	0	0	1000	0	1	2.7.4.6		PMID:11768308;PMID9099850
RCR10155	ATP:dUMP phosphotransferase	m01754[c] + m01285[c] <==> m01755[c] + m01371[c]	301622			Nucleotide metabolism	1	-1000	1000	0	1	2.7.4.9
RCR10156	L-Arginine:glycine amidinotransferase	m01365[c] + m01986[c] <==> m02036[c] + m02658[c]	81660			Glycine serine and threonine metabolism	1	-1000	1000	0	1	2.1.4.1		PMID:15465786;PMID:9148748
RCR10157	2-Oxobutanoate dehydrogenase, cytosolic	m00671[c] + m02552[c] + m01597[c] --> m02774[c] + m01596[c] + m02553[c] + m02039[c]				Glycine serine and threonine metabolism	0	0	1000	0	1	1.2.7.2
RCR10158	L-histidine carboxy-lyase (histamine-forming)	m02125[c] --> m02124[c] + m01596[c]	24311 or 24443			Aromatic amino acid metabolism	0	0	1000	0	1	4.1.1.22;4.1.1.28		PMID:11513473;PMID:6778871
RCR10159	RCR10159[c]	m02426[c] --> m00204[c] + m02040[c]				Lysine metabolism	0	0	1000	0	1
RCR10160	L-tyrosine:2-oxoglutarate aminotransferase	m01306[c] + m03101[c] --> m01005[c] + m01974[c]	24401 or 24813 or 25721			Aromatic amino acid metabolism	0	0	1000	0	1	2.6.1.1;2.6.1.5;2.6.1.57		PMID:15865;PMID:3207426;PMID:4396841;PMID:7719646;PMID:7999802
RCR10161	L-Tyrosine:oxygen oxidoreductase (deaminating)	m03101[c] + m02630[c] + m02040[c] --> m01005[c] + m02578[c] + m02041[c]	100360621			Aromatic amino acid metabolism	0	0	1000	0	1	1.4.3.2		PMID:15865;PMID:3207426;PMID:4396841;PMID:7719646;PMID:7999802
RCR10162	4-Hydroxyphenylpyruvate:oxygen oxidoreductase (hydroxylating,decarboxylating)	m01005[c] + m02630[c] --> m02135[c] + m01596[c]	29531			Aromatic amino acid metabolism	0	0	1000	0	1	1.13.11.27		PMID:2014797;PMID:3037254;PMID:4627454
RCR10163	Se-methyl-L-selenocysteine methaneselenol-lyase (deaminating,pyruvate-forming)	m02895[c] + m02040[c] --> m02469[c] + m02819[c] + m02578[c]	363285			Cysteine and methionine metabolism	0	0	1000	0	1	4.4.1.16
RCR10164	(S)-malate:NAD+ oxidoreductase	m02633[c] + m02553[c] + m02039[c] <==> m02439[c] + m02552[c]	24551 or 316444			Central carbon metabolism	1	-1000	1000	0	1	1.1.1.37		PMID:6625603;PMID:7305925
RCR10165	hydrogen-peroxide:hydrogen-peroxide oxidoreductase	2 m02041[c] --> m02630[c] + 2 m02040[c]	24248			Electron transport chain	0	0	0	0	1	1.11.1.6	problematic	PMID:12054464;PMID:1657986;PMID12054464;PMID1657986
RCR10166	linoleoyl-CoA desaturase	m00134[c] + m02553[c] + m02630[c] + m02039[c] --> m00113[c] + m02552[c] + 2 m02040[c]	84575 or 83512 or 286922			Omega-3 fatty acid metabolism	0	0	1000	0	1	1.14.19.3
RCR10167	Arachidonate:oxygen 15-oxidoreductase	m01362[c] + m02630[c] --> m00380[c]	266604 or 81639			Arachidonic acid metabolism	0	0	1000	0	1	1.13.11.33		PMID11839751
RCR10168	Leukotriene C4 synthase	m02362[r] + m02026[r] --> m02366[r]	114097			Eicosanoid metabolism	0	0	1000	0	1	4.4.1.20		PMID11160764
RCR10169	(5Z,13E)-(15S)-9alpha,11alpha-Epidioxy-15-hydroxyprosta-5,13- dienoate D-isomerase	m02783[r] <==> m02794[r]	25526 or 58962			Eicosanoid metabolism	1	-1000	1000	0	1	5.3.99.2		PMID9065498;PMID9353279
RCR10170	(5Z,13E)-(15S)-9alpha,11alpha-epidioxy-15-hydroxyprosta-5,13- dienoate E-isomerase	m02786[r] <==> m02794[r]	362809 or 59103 or 311865 or 367808			Eicosanoid metabolism	1	-1000	1000	0	1	5.3.99.3		PMID11847219
RCR10171	Estrone 3-sulfate sulfohydrolase	m01789[r] + m02040[r] --> m01790[r] + m02946[r]	24800			Steroid metabolism	0	0	1000	0	1	3.1.6.2
RCR10172	17alpha-Hydroxypregnenolone:NAD+ 3-oxidoreductase	m00408[c] + m02552[c] --> m00409[c] + m02553[c] + m02039[c]	682974 or 100911154 or 360348 or 100911116			Steroid metabolism	0	0	1000	0	1	5.3.3.1		PMID12205101
RCR10173	5alpha-cholest-7-en-3beta-ol, NADH:oxygen 5-oxidoreductase	m02343[c] + m02553[c] + m02630[c] + m02039[c] --> m02805[c] + m02552[c] + 2 m02040[c]	114100			Cholesterol metabolism	0	0	1000	0	1	1.14.21.6		PMID:11731337;PMID:7946524
RCR10174	CMP-N-acetylneuraminate-beta-galactosamide-alpha-2,3-sialyltransferase, Golgi apparatus	m01904[g] + m01592[g] --> m02010[g] + m01590[g]	64442 or 363040 or 362924			Sphingolipid metabolism	0	0	1000	0	1	2.4.99.4
RCR10175	glycerol-3-phosphate 1-O-acyltransferase	m00129[c] + m02914[c] --> m00471[c] + m01597[c]	29653 or 305166 or 290843 or 296130			Glycerolipid metabolism	0	0	1000	0	1	2.3.1.15		PMID:12573444;PMID:17170135;PMID:17389595;UNIPROT:AGPAT6;UNIPROT:AGPAT9;UNIPROT:Q6NUI2;UNIPROT:Q9HCL2
RCR10176	glycerol-3-phosphate 1-O-acyltransferase[c]	m00118[c] + m02914[c] --> m00463[c] + m01597[c]	29653 or 305166 or 290843 or 296130			Glycerolipid metabolism	0	0	1000	0	1	2.3.1.15		PMID:12573444;PMID:17170135;PMID:17389595;UNIPROT:AGPAT6;UNIPROT:AGPAT9;UNIPROT:Q6NUI2;UNIPROT:Q9HCL2
RCR10177	alpha-glycerophosphate acyltransferase	m01141[c] + m02914[c] --> m00454[c] + m01597[c]	29653 or 305166 or 290843 or 296130			Glycerolipid metabolism	0	0	1000	0	1	2.3.1.15		PMID:12573444;PMID:17170135;PMID:17389595;UNIPROT:AGPAT6;UNIPROT:AGPAT9;UNIPROT:Q6NUI2;UNIPROT:Q9HCL2
RCR10178	3-glycerophosphate acyltransferase	m01191[c] + m02914[c] --> m00461[c] + m01597[c]	29653 or 305166 or 290843 or 296130			Glycerolipid metabolism	0	0	1000	0	1	2.3.1.15		PMID:12573444;PMID:17170135;PMID:17389595;UNIPROT:AGPAT6;UNIPROT:AGPAT9;UNIPROT:Q6NUI2;UNIPROT:Q9HCL2
RCR10179	ACP:sn-glycerol-3-phosphate acyltransferase	m00004[c] + m02914[c] --> m00438[c] + m01597[c]	29653 or 305166 or 290843 or 296130			Glycerolipid metabolism	0	0	1000	0	1	2.3.1.15		PMID:12573444;PMID:17170135;PMID:17389595;UNIPROT:AGPAT6;UNIPROT:AGPAT9;UNIPROT:Q6NUI2;UNIPROT:Q9HCL2
RCR10180	glycerol 3-phosphate acyltransferase	m01237[c] + m02914[c] --> m00469[c] + m01597[c]	29653 or 305166 or 290843 or 296130			Glycerolipid metabolism	0	0	1000	0	1	2.3.1.15		PMID:12573444;PMID:17170135;PMID:17389595;UNIPROT:AGPAT6;UNIPROT:AGPAT9;UNIPROT:Q6NUI2;UNIPROT:Q9HCL2
RCR10181	glycerol phosphate acyltransferase	m00020[c] + m02914[c] --> m00448[c] + m01597[c]	29653 or 305166 or 290843 or 296130			Glycerolipid metabolism	0	0	1000	0	1	2.3.1.15		PMID:12573444;PMID:17170135;PMID:17389595;UNIPROT:AGPAT6;UNIPROT:AGPAT9;UNIPROT:Q6NUI2;UNIPROT:Q9HCL2
RCR10182	glycerol phosphate transacylase	m01586[c] + m02914[c] --> m00474[c] + m01597[c]	29653 or 305166 or 290843 or 296130			Glycerolipid metabolism	0	0	1000	0	1	2.3.1.15		PMID:12573444;PMID:17170135;PMID:17389595;UNIPROT:AGPAT6;UNIPROT:AGPAT9;UNIPROT:Q6NUI2;UNIPROT:Q9HCL2
RCR10183	glycerophosphate acyltransferase	m00127[c] + m02914[c] --> m00470[c] + m01597[c]	29653 or 305166 or 290843 or 296130			Glycerolipid metabolism	0	0	1000	0	1	2.3.1.15		PMID:12573444;PMID:17170135;PMID:17389595;UNIPROT:AGPAT6;UNIPROT:AGPAT9;UNIPROT:Q6NUI2;UNIPROT:Q9HCL2
RCR10184	glycerophosphate transacylase	m00116[c] + m02914[c] --> m00462[c] + m01597[c]	29653 or 305166 or 290843 or 296130			Glycerolipid metabolism	0	0	1000	0	1	2.3.1.15		PMID:12573444;PMID:17170135;PMID:17389595;UNIPROT:AGPAT6;UNIPROT:AGPAT9;UNIPROT:Q6NUI2;UNIPROT:Q9HCL2
RCR10185	sn-glycerol 3-phosphate acyltransferase	m00106[c] + m02914[c] --> m00458[c] + m01597[c]	29653 or 305166 or 290843 or 296130			Glycerolipid metabolism	0	0	1000	0	1	2.3.1.15		PMID:12573444;PMID:17170135;PMID:17389595;UNIPROT:AGPAT6;UNIPROT:AGPAT9;UNIPROT:Q6NUI2;UNIPROT:Q9HCL2
RCR10186	sn-glycerol-3-phosphate acyltransferase	m00018[c] + m02914[c] --> m00447[c] + m01597[c]	29653 or 305166 or 290843 or 296130			Glycerolipid metabolism	0	0	1000	0	1	2.3.1.15		PMID:12573444;PMID:17170135;PMID:17389595;UNIPROT:AGPAT6;UNIPROT:AGPAT9;UNIPROT:Q6NUI2;UNIPROT:Q9HCL2
RCR10187	glycerol-3-phosphate O-acyltransferase (ambiguous)	m00007[c] + m02914[c] --> m00442[c] + m01597[c]	29653 or 305166 or 290843 or 296130			Glycerolipid metabolism	0	0	1000	0	1	2.3.1.15		PMID:12573444;PMID:17170135;PMID:17389595;UNIPROT:AGPAT6;UNIPROT:AGPAT9;UNIPROT:Q6NUI2;UNIPROT:Q9HCL2
RCR10188	alpha-glycerophosphate acyltransferase[c]	m01236[c] + m02914[c] --> m00468[c] + m01597[c]	29653 or 305166 or 290843 or 296130			Glycerolipid metabolism	0	0	1000	0	1	2.3.1.15		PMID:12573444;PMID:17170135;PMID:17389595;UNIPROT:AGPAT6;UNIPROT:AGPAT9;UNIPROT:Q6NUI2;UNIPROT:Q9HCL2
RCR10189	3-glycerophosphate acyltransferase[c]	m00123[c] + m02914[c] --> m00465[c] + m01597[c]	29653 or 305166 or 290843 or 296130			Glycerolipid metabolism	0	0	1000	0	1	2.3.1.15		PMID:12573444;PMID:17170135;PMID:17389595;UNIPROT:AGPAT6;UNIPROT:AGPAT9;UNIPROT:Q6NUI2;UNIPROT:Q9HCL2
RCR10190	ACP:sn-glycerol-3-phosphate acyltransferase[c]	m00101[c] + m02914[c] --> m00453[c] + m01597[c]	29653 or 305166 or 290843 or 296130			Glycerolipid metabolism	0	0	1000	0	1	2.3.1.15		PMID:12573444;PMID:17170135;PMID:17389595;UNIPROT:AGPAT6;UNIPROT:AGPAT9;UNIPROT:Q6NUI2;UNIPROT:Q9HCL2
RCR10191	glycerol 3-phosphate acyltransferase[c]	m00016[c] + m02914[c] --> m00446[c] + m01597[c]	29653 or 305166 or 290843 or 296130			Glycerolipid metabolism	0	0	1000	0	1	2.3.1.15		PMID:12573444;PMID:17170135;PMID:17389595;UNIPROT:AGPAT6;UNIPROT:AGPAT9;UNIPROT:Q6NUI2;UNIPROT:Q9HCL2
RCR10192	glycerol phosphate acyltransferase[c]	m00006[c] + m02914[c] --> m00441[c] + m01597[c]	29653 or 305166 or 290843 or 296130			Glycerolipid metabolism	0	0	1000	0	1	2.3.1.15		PMID:12573444;PMID:17170135;PMID:17389595;UNIPROT:AGPAT6;UNIPROT:AGPAT9;UNIPROT:Q6NUI2;UNIPROT:Q9HCL2
RCR10193	glycerol phosphate transacylase[c]	m00025[c] + m02914[c] --> m00449[c] + m01597[c]	29653 or 305166 or 290843 or 296130			Glycerolipid metabolism	0	0	1000	0	1	2.3.1.15		PMID:12573444;PMID:17170135;PMID:17389595;UNIPROT:AGPAT6;UNIPROT:AGPAT9;UNIPROT:Q6NUI2;UNIPROT:Q9HCL2
RCR10194	glycerophosphate acyltransferase[c]	m00108[c] + m02914[c] --> m00457[c] + m01597[c]	29653 or 305166 or 290843 or 296130			Glycerolipid metabolism	0	0	1000	0	1	2.3.1.15		PMID:12573444;PMID:17170135;PMID:17389595;UNIPROT:AGPAT6;UNIPROT:AGPAT9;UNIPROT:Q6NUI2;UNIPROT:Q9HCL2
RCR10195	glycerophosphate transacylase[c]	m00125[c] + m02914[c] --> m00464[c] + m01597[c]	29653 or 305166 or 290843 or 296130			Glycerolipid metabolism	0	0	1000	0	1	2.3.1.15		PMID:12573444;PMID:17170135;PMID:17389595;UNIPROT:AGPAT6;UNIPROT:AGPAT9;UNIPROT:Q6NUI2;UNIPROT:Q9HCL2
RCR10196	sn-glycerol 3-phosphate acyltransferase[c]	m00103[c] + m02914[c] --> m00452[c] + m01597[c]	29653 or 305166 or 290843 or 296130			Glycerolipid metabolism	0	0	1000	0	1	2.3.1.15		PMID:12573444;PMID:17170135;PMID:17389595;UNIPROT:AGPAT6;UNIPROT:AGPAT9;UNIPROT:Q6NUI2;UNIPROT:Q9HCL2
RCR10197	sn-glycerol-3-phosphate acyltransferase[c]	m00121[c] + m02914[c] --> m00459[c] + m01597[c]	29653 or 305166 or 290843 or 296130			Glycerolipid metabolism	0	0	1000	0	1	2.3.1.15		PMID:12573444;PMID:17170135;PMID:17389595;UNIPROT:AGPAT6;UNIPROT:AGPAT9;UNIPROT:Q6NUI2;UNIPROT:Q9HCL2
RCR10198	glycerol-3-phosphate O-acyltransferase (ambiguous)[c]	m00134[c] + m02914[c] --> m00466[c] + m01597[c]	29653 or 305166 or 290843 or 296130			Glycerolipid metabolism	0	0	1000	0	1	2.3.1.15		PMID:12573444;PMID:17170135;PMID:17389595;UNIPROT:AGPAT6;UNIPROT:AGPAT9;UNIPROT:Q6NUI2;UNIPROT:Q9HCL2
RCR10199	RCR10199[c]	m00113[c] + m02914[c] --> m00455[c] + m01597[c]	29653 or 305166 or 290843 or 296130			Glycerolipid metabolism	0	0	1000	0	1	2.3.1.15		PMID:12573444;PMID:17170135;PMID:17389595;UNIPROT:AGPAT6;UNIPROT:AGPAT9;UNIPROT:Q6NUI2;UNIPROT:Q9HCL2
RCR10200	RCR10200[c]	m00095[c] + m02914[c] --> m00450[c] + m01597[c]	29653 or 305166 or 290843 or 296130			Glycerolipid metabolism	0	0	1000	0	1	2.3.1.15		PMID:12573444;PMID:17170135;PMID:17389595;UNIPROT:AGPAT6;UNIPROT:AGPAT9;UNIPROT:Q6NUI2;UNIPROT:Q9HCL2
RCR10201	RCR10201[c]	m00012[c] + m02914[c] --> m00439[c] + m01597[c]	29653 or 305166 or 290843 or 296130			Glycerolipid metabolism	0	0	1000	0	1	2.3.1.15		PMID:12573444;PMID:17170135;PMID:17389595;UNIPROT:AGPAT6;UNIPROT:AGPAT9;UNIPROT:Q6NUI2;UNIPROT:Q9HCL2
RCR10202	RCR10202[c]	m00343[c] + m02914[c] --> m00444[c] + m01597[c]	29653 or 305166 or 290843 or 296130			Glycerolipid metabolism	0	0	1000	0	1	2.3.1.15		PMID:12573444;PMID:17170135;PMID:17389595;UNIPROT:AGPAT6;UNIPROT:AGPAT9;UNIPROT:Q6NUI2;UNIPROT:Q9HCL2
RCR10203	RCR10203[c]	m00262[c] + m02914[c] --> m00436[c] + m01597[c]	29653 or 305166 or 290843 or 296130			Glycerolipid metabolism	0	0	1000	0	1	2.3.1.15		PMID:12573444;PMID:17170135;PMID:17389595;UNIPROT:AGPAT6;UNIPROT:AGPAT9;UNIPROT:Q6NUI2;UNIPROT:Q9HCL2
RCR10204	RCR10204[c]	m00317[c] + m02914[c] --> m00443[c] + m01597[c]	29653 or 305166 or 290843 or 296130			Glycerolipid metabolism	0	0	1000	0	1	2.3.1.15		PMID:12573444;PMID:17170135;PMID:17389595;UNIPROT:AGPAT6;UNIPROT:AGPAT9;UNIPROT:Q6NUI2;UNIPROT:Q9HCL2
RCR10205	RCR10205[c]	m01364[c] + m02914[c] --> m00472[c] + m01597[c]	29653 or 305166 or 290843 or 296130			Glycerolipid metabolism	0	0	1000	0	1	2.3.1.15		PMID:12573444;PMID:17170135;PMID:17389595;UNIPROT:AGPAT6;UNIPROT:AGPAT9;UNIPROT:Q6NUI2;UNIPROT:Q9HCL2
RCR10206	RCR10206[c]	m00119[c] + m02914[c] --> m00460[c] + m01597[c]	29653 or 305166 or 290843 or 296130			Glycerolipid metabolism	0	0	1000	0	1	2.3.1.15		PMID:12573444;PMID:17170135;PMID:17389595;UNIPROT:AGPAT6;UNIPROT:AGPAT9;UNIPROT:Q6NUI2;UNIPROT:Q9HCL2
RCR10207	RCR10207[c]	m00131[c] + m02914[c] --> m00467[c] + m01597[c]	29653 or 305166 or 290843 or 296130			Glycerolipid metabolism	0	0	1000	0	1	2.3.1.15		PMID:12573444;PMID:17170135;PMID:17389595;UNIPROT:AGPAT6;UNIPROT:AGPAT9;UNIPROT:Q6NUI2;UNIPROT:Q9HCL2
RCR10208	RCR10208[c]	m00110[c] + m02914[c] --> m00456[c] + m01597[c]	29653 or 305166 or 290843 or 296130			Glycerolipid metabolism	0	0	1000	0	1	2.3.1.15		PMID:12573444;PMID:17170135;PMID:17389595;UNIPROT:AGPAT6;UNIPROT:AGPAT9;UNIPROT:Q6NUI2;UNIPROT:Q9HCL2
RCR10209	RCR10209[c]	m00093[c] + m02914[c] --> m00451[c] + m01597[c]	29653 or 305166 or 290843 or 296130			Glycerolipid metabolism	0	0	1000	0	1	2.3.1.15		PMID:12573444;PMID:17170135;PMID:17389595;UNIPROT:AGPAT6;UNIPROT:AGPAT9;UNIPROT:Q6NUI2;UNIPROT:Q9HCL2
RCR10210	RCR10210[c]	m00009[c] + m02914[c] --> m00440[c] + m01597[c]	29653 or 305166 or 290843 or 296130			Glycerolipid metabolism	0	0	1000	0	1	2.3.1.15		PMID:12573444;PMID:17170135;PMID:17389595;UNIPROT:AGPAT6;UNIPROT:AGPAT9;UNIPROT:Q6NUI2;UNIPROT:Q9HCL2
RCR10211	RCR10211[c]	m00023[c] + m02914[c] --> m00445[c] + m01597[c]	29653 or 305166 or 290843 or 296130			Glycerolipid metabolism	0	0	1000	0	1	2.3.1.15		PMID:12573444;PMID:17170135;PMID:17389595;UNIPROT:AGPAT6;UNIPROT:AGPAT9;UNIPROT:Q6NUI2;UNIPROT:Q9HCL2
RCR10212	RCR10212[c]	m00264[c] + m02914[c] --> m00437[c] + m01597[c]	29653 or 305166 or 290843 or 296130			Glycerolipid metabolism	0	0	1000	0	1	2.3.1.15		PMID:12573444;PMID:17170135;PMID:17389595;UNIPROT:AGPAT6;UNIPROT:AGPAT9;UNIPROT:Q6NUI2;UNIPROT:Q9HCL2
RCR10213	galactosylceramide sulfotransferase	m02328[c] + m02682[c] <==> m02334[c] + m02681[c]	683713			Sphingolipid metabolism	1	-1000	1000	0	1	2.8.2.11		PMID:1330860
RCR10214	(5Z,13E)-(15S)-9alpha,11alpha-Epidioxy-15-hydroxyprosta-5,13- dienoate 6-isomerase	m02794[r] --> m02795[r]	25527			Eicosanoid metabolism	0	0	1000	0	1	5.3.99.4		PMID:15115769;PMID2120373;PMID2491846
RCR10215	prostaglandin-F synthase	m02789[c] + m02552[c] --> m02794[c] + m02553[c] + m02039[c]	171516			Eicosanoid metabolism	0	0	1000	0	1	1.1.1.188
RCR10216	prostaglandin-endoperoxide synthase	m02791[r] + 2 m02039[r] <==> m02793[r] + m02040[r]	29527 or 24693			Eicosanoid metabolism	1	-1000	1000	0	1	1.14.99.1
RCR10217	choloyl-CoA hydrolase	m01514[c] + m02040[c] --> m01445[c] + m01597[c]	170588			Bile acid metabolism	0	0	1000	0	1	3.1.2.27		PMID:10884298
RCR10218	Choloyl-CoA:glycine N-choloyltransferase	m01514[c] + m01986[c] --> m01988[c] + m01597[c]	29725			Bile acid metabolism	0	0	1000	0	1	2.3.1.65		PMID:10884298;PMID:12239217;PMID:12543708;PMID:15026425;PMID:3741411;PMID:6884990;PMID10884298;PMID12239217;PMID12543708;PMID15026425;PMID3741411;PMID6884990
RCR10219	chenodeoxycholoyl-CoA hydrolase	m01434[c] + m02040[c] --> m01435[c] + m01597[c]	26759 or 29725 or 192272 or 681337 or 314304 or 50559 or 299193			Bile acid metabolism	0	0	1000	0	1	3.1.2.2		PMID:11673457;PMID:11454857;PMID:10944470;PMID:10817395
RCR10220	chenodeoxycholate:CoA ligase (AMP-forming)	m01434[c] + m01334[c] + m02759[c] <==> m01435[c] + m01371[c] + m01597[c]	79111 or 65192			Bile acid metabolism	1	-1000	1000	0	1	6.2.1.7		PMID:10749848;PMID:10884298;PMID:15026425;PMID:438652;PMID:6173037
RCR10221	L-Cysteine:oxygen oxidoreductase	m01628[c] + m02630[c] --> m00918[c]	81718			Bile acid metabolism	0	0	1000	0	1	1.13.11.20		PMID:7524679
RCR10222	ATP:1-phosphatidyl-1D-myo-inositol-4-phosphate 3-phosphotransferase	m00553[c] + m01371[c] --> m00551[c] + m01285[c]	116720 or 289021 or 361632 or 497931			Inositol phosphate metabolism	0	0	1000	0	1	2.7.1.154
RCR10223	phosphatidylinositol 3-phosphate 4-kinase	m00552[c] + m01371[c] --> m00551[c] + m01285[c]	314641 or 309419 or 365865 or 687758			Inositol phosphate metabolism	0	0	1000	0	1	2.7.1.68
RCR10224	ATP:1-phosphatidyl-1D-myo-inositol-4-phosphate 3-phosphotransferase[n]	m00553[n] + m01371[n] --> m00551[n] + m01285[n]	116720 or 289021 or 361632			Inositol phosphate metabolism	0	0	1000	0	1
RCR10225	5-methyltetrahydrofolate:NAD+ oxidoreductase	m01045[c] + m02553[c] + m02039[c] --> m01115[c] + m02552[c]	362657			Vitamin B metabolism	0	0	1000	0	1	1.5.1.20		PMID:1119805;PMID:2383427;PMID1119805;PMID2383427
RCR10226	uronolactonase, endoplasmic reticulum	m01685[r] + m02040[r] <==> m01973[r]				Vitamin C metabolism	1	-1000	1000	0	1
RCR10227	retinal:NAD+ oxidoreductase	m02832[c] + m02552[c] + m02040[c] --> m02833[c] + m02553[c] + m02039[c]	116676 or 24188			Vitamin A metabolism	0	0	1000	0	1	1.2.1.36		PMID1503811
RCR10228	FADH2:NAD+ oxidoreductase	m01802[c] + m02553[c] + m02039[c] --> m01803[c] + m02552[c]				Vitamin B metabolism	0	0	1000	0	1	1.5.1.38		PMID:10620517;PMID10620517
RCR10229	carbonate hydro-lyase (carbon-dioxide-forming)[c]	m01596[c] + m02040[c] --> m02046[c] + m02039[c]	288360 or 291819 or 297814 or 298657 or 302669 or 310218 or 313495 or 363085 or 499566 or 54232 or 54233 or 791259 or 54231 or 29242			Miscellaneous	0	0	1000	0	1	4.2.1.1		PMID11101628;PMID11172051;PMID11676494;PMID14600151;PMID7574487
RCR10230	ATP:3-phospho-D-glycerate 1-phosphotransferase	m00247[c] + m01285[c] <==> m00913[c] + m01371[c]	24644 or 316265 or 683007			Central carbon metabolism	1	-1000	1000	0	1	2.7.2.3		PMID:367367;PMID:4203909;UNIPROT:P00558
RCR10231	maltose glucohydrolase	m02450[l] + m02040[l] --> 2 m01965[l]	367562			Central carbon metabolism	0	0	1000	0	1	3.2.1.20
RCR10232	RCR10232[c]	m02454[c] + m01371[c] --> m01717[c] + m01285[c]	303755 or 313744 or 298250 or 304885 or 498034			Carbohydrate metabolism	0	0	1000	0	1	2.7.1.-		PMID:10085245
RCR10233	GTP diphosphate-lyase (cyclizing,3',5'-cyclic-GMP-forming)	m02034[c] --> m01433[c] + m02759[c]	(25202 or 25206) and (497757 or 66012)			Purine metabolism	0	0	1000	0	1	4.6.1.1;4.6.1.2		PMID:11952099;PMID10449911;PMID10777682;PMID11565546;PMID11851379;PMID1352257;PMID14748740;PMID15371450;PMID7601467;PMID7761400;PMID7777544;PMID7954658;PMID8838319;PMID9097965;PMID9742212
RCR10234	UMP kinase (dCTP),nuclear	m01643[n] + m03106[n] <==> m01645[n] + m03114[n]	298410			Nucleotide metabolism	1	-1000	1000	0	1	2.7.4.14		PMID10462544;PMID11912132
RCR10235	ATP:dCDP phosphotransferase[m]	m01645[m] + m01285[m] <==> m01643[m] + m01371[m]	171566 or 191575 or 58964 or 685679 or 688903 or 83782 or 85269			Nucleotide metabolism	1	-1000	1000	0	1	2.7.4.6		PMID9099850
RCR10236	ATP:dCDP phosphotransferase[n]	m01645[n] + m01285[n] <==> m01643[n] + m01371[n]	191575 or 83782			Nucleotide metabolism	1	-1000	1000	0	1	2.7.4.6		PMID7050910
RCR10237	Cytidine aminohydrolase	m01630[n] + m02040[n] --> m03123[n] + m02578[n]	399679			Nucleotide metabolism	0	0	1000	0	1	3.5.4.5
RCR10238	cytidylate kinase (dCMP,dATP)	2 m01643[n] <==> m01645[n] + m01644[n]	298410			Nucleotide metabolism	1	-1000	1000	0	1	2.7.4.14		PMID10462544;PMID11912132
RCR10239	UMP/CMP kinase	m01424[n] + m01643[n] <==> m01645[n] + m01590[n]	298410			Nucleotide metabolism	1	-1000	1000	0	1	2.7.4.14		PMID10462544;PMID11912132
RCR10240	S-adenosyl-L-methionine carboxy-lyase [(5-deoxy-5-adenosyl)(3-aminopropyl)methylsulfonium-forming]	m02877[c] + m02039[c] --> m02870[c] + m01596[c]	81640			Arginine and proline metabolism	0	0	1000	0	1	4.1.1.50		PMID:1764068;PMID2460457
RCR10241	L-histidine:4-aminobutanoate ligase (ADP-forming)	m00970[c] + m02125[c] + m01371[c] --> m02132[c] + m01334[c] + m02759[c]	309150			Arginine and proline metabolism	0	0	1000	0	1	6.3.2.11		PMID:448355;PMID:487087
RCR10242	alpha-Aminobutyryl histidine hydrolase	m02132[c] + m02040[c] --> m00970[c] + m02125[c]	291394 or 307212			Arginine and proline metabolism	0	0	1000	0	1	3.4.13.18;3.4.13.20		PMID:2334521;PMID:4026801
RCR10243	RCR10243[c]	m02518[c] + m01597[c] <==> m02923[c] + m01261[c]				Arginine and proline metabolism	1	-1000	1000	0	1
RCR10244	L-Proline:NADP+ 5-oxidoreductase	m00559[m] + m02555[m] + m02039[m] --> m02770[m] + m02554[m]	364064 or 300035 or 287877 or 498299			Arginine and proline metabolism	0	0	1000	0	1	1.5.1.2
RCR10245	L-Alanine:glyoxylate aminotransferase	m02007[m] + m01307[m] --> m02819[m] + m01986[m]	24792 or 83784			Glycine serine and threonine metabolism	0	0	1000	0	1	2.6.1.44
RCR10246	glycine:lipoylprotein oxidoreductase (decarboxylating and acceptor-aminomethylating)	m02400[m] + m01986[m] --> m02879[m] + m01596[m]	309312 and 298942 and 306586 and 171133			Glycine serine and threonine metabolism	0	0	1000	0	1	1.4.4.2
RCR10247	Acetyl-CoA:acetyl-CoA C-acetyltransferase	m01255[m] + m01597[m] <==> 2 m01261[m]	25014			Aromatic amino acid metabolism	1	-1000	1000	0	1	2.3.1.9		PMID:10064897;PMID:10806397;PMID:1121274;PMID:11330060;PMID:15733928;PMID:1679347;PMID:16927236;PMID:17236799;PMID:1735445;PMID:1979337;PMID:3194209;PMID:6131897;PMID:6378901;PMID:7911016;PMID:8241273;PMID:3709573
RCR10248	monoamine oxidase	m02617[c] + m02630[c] + m02040[c] --> m00726[c] + m02578[c] + m02041[c]	25750 or 29253			Aromatic amino acid metabolism	0	0	1000	0	1	1.4.3.4
RCR10249	glutathione gamma-glutamylaminopeptidase	m02026[c] + m02040[c] --> m01626[c] + m01974[c]	156275 or 408206 or 116568 or 29566			Glutathione metabolism	0	0	1000	0	1	2.3.2.2;3.4.11.4		PMID:1968061;PMID:3511062
RCR10250	L-cysteinylglycine dipeptidase	m01626[c] + m02040[c] --> m01628[c] + m01986[c]	81641 or 289668 or 50558			Glutathione metabolism	0	0	1000	0	1	3.4.11.1;3.4.11.2		PMID:16189153;PMID:9751082
RCR10251	glycine:tRNA(Gly) ligase (AMP-forming)	m03070[c] + m01986[c] + m01371[c] --> m02006[c] + m01334[c] + m02759[c]	297113			Protein metabolism	0	0	1000	0	1	6.1.1.14
RCR10252	RCR10252[c]	m01365[c] --> m00197[c] + m02040[c]				Protein metabolism	0	0	1000	0	1
RCR10253	Acetoacetate:CoA ligase (AMP-forming)	m01253[m] + m01371[m] + m01597[m] --> m01255[m] + m01334[m] + m02759[m]	65984			Cholesterol metabolism	0	0	1000	0	1	6.2.1.16		PMID:4073493;PMID4073493
RCR10254	1-Alkyl-2-acetyl-sn-glycero-3-phosphocholine acetohydrolase	m00626[c] + m02040[c] --> m00549[c] + m01252[c]	64189 or 83572 or 114113 or 246266 or 313611			Glycerolipid metabolism	0	0	1000	0	1	3.1.1.47
RCR10255	Acetyl-CoA:1-alkyl-sn-glycero-3-phosphocholine 2-O-acetyltransferase	m00549[c] + m01261[c] --> m00626[c] + m01597[c]	361467 or 100359680			Glycerolipid metabolism	0	0	1000	0	1	2.3.1.67
RCR10256	prostaglandin-endoperoxide synthase[r]	m02792[r] + 2 m02039[r] --> m02794[r] + m02040[r]	29527 or 24693			Eicosanoid metabolism	0	0	1000	0	1	1.14.99.1		PMID:4514999
RCR10257	prostaglandin A isomerase	m02777[c] <==> m02781[c]				Eicosanoid metabolism	1	-1000	1000	0	1	5.3.-.-		PMID:234423
RCR10258	prostaglandin-A1 Delta-isomerase	m02779[c] <==> m02781[c]				Eicosanoid metabolism	1	-1000	1000	0	1	5.3.3.9		PMID:234423
RCR10259	PGE1 dehydration	m02776[c] + m02040[c] <==> m02785[c]	361020 or 287949			Eicosanoid metabolism	1	-1000	1000	0	1	4.2.1.-		PMID:234423
RCR10260	prostaglandin-A1 Delta-isomerase[c]	m02776[c] <==> m02780[c]				Eicosanoid metabolism	1	-1000	1000	0	1	5.3.3.9		PMID:234423
RCR10261	prostaglandin A isomerase[c]	m02778[c] <==> m02780[c]				Eicosanoid metabolism	1	-1000	1000	0	1	5.3.3.9		PMID:234423
RCR10262	Acyl-CoA:1-alkyl-sn-glycero-3-phosphocholine O-acyltransferase	m01276[c] + m00549[c] --> m00560[c] + m01597[c]	361467 or 362434 or 100359680 or 296048			Glycerolipid metabolism	0	0	1000	0	1	2.3.1.23
RCR10263	3alpha,7alpha-dihydroxy-5beta-cholanoyl-CoA:glycine N-choloyltransferase	m01434[c] + m01986[c] --> m01987[c] + m01597[c]	29725			Bile acid metabolism	0	0	1000	0	1	2.3.1.65		PMID:12810727;PMID:6884990;PMID12810727;PMID6884990
RCR10264	Isocitrate:NADP+ oxidoreductase (decarboxylating)	m02183[p] + m02554[p] --> m01306[p] + m01596[p] + m02555[p] + m02039[p]	24479 or 361596			Vitamin B metabolism	0	0	1000	0	1	1.1.1.42		PMID:15173171;PMID:10521434
RCR10265	Aldehyde:oxygen oxidoreductase	m00536[c] + m02630[c] + m02040[c] --> m02506[c] + m02041[c] + m02039[c]	316421 or 316424 or 493909 or 54349			Vitamin B metabolism	0	0	1000	0	1	1.2.3.1		PMID20038499
RCR10266	phosphatidylinositol 3,4-bisphosphate 5-kinase, nuclear	m00551[n] + m01371[n] --> m02734[n] + m01285[n]	314641 or 309419 or 365865 or 687758			Inositol phosphate metabolism	0	0	1000	0	1
RCR10267	phosphatidylinositol 4-phosphate phospholipase C	m00553[c] + m02040[c] --> m00526[c] + m00240[c]	25738 or 140693 or 24655 or 287745 or 24654 or 25031 or 29322 or 85240 or 29337 or 114633 or 497197			Inositol phosphate metabolism	0	0	1000	0	1	3.1.4.11
RCR10268	5,10-methylenetetrahydrofolate:NADP+ oxidoreductase	m01044[m] + m02555[m] <==> m01045[m] + m02554[m]	64300			Vitamin B metabolism	1	-1000	1000	0	1	1.5.1.5		PMID:12937168;PMID:14597174;PMID:15033905;PMID:16171773;PMID:23838;PMID:3053686;PMID:8218174;PMID12937168;PMID8218174
RCR10269	5,10-Methenyltetrahydrofolate 5-hydrolase (decyclizing)	m00266[c] + m02039[c] <==> m01044[c] + m02040[c]	64300			Vitamin B metabolism	1	-1000	1000	0	1	3.5.4.9		PMID:12937168;PMID:16171773;PMID:3053686;PMID2786332
RCR10270	GTP 8,9-lyase (cyclic pyranopterin monophosphate-forming)	m02034[c] + m02040[c] --> m01618[c] + m02759[c]	301221			Vitamin B metabolism	0	0	1000	0	1	4.1.99.18
RCR10271	thiocarboxylated molybdopterin synthase:cyclic pyranopterin phosphate sulfurtransferase	m01618[c] + 2 m02682[c] --> m02488[c] + 2 m02681[c]	294753			Vitamin B metabolism	0	0	1000	0	1
RCR10272	5,10-methylenetetrahydrofolate:NAD+ oxidoreductase	m01044[c] + m02553[c] <==> m01045[c] + m02552[c]	64300			Vitamin B metabolism	1	-1000	1000	0	1	1.5.1.5		PMID2786332
RCR10273	RCR10273[c]	m00349[c] <==> m02832[c]				Vitamin A metabolism	1	-1000	1000	0	1			PMID:9647871
RCR10274	retinal dehydrogenase	m00349[c] + m02552[c] + m02040[c] <==> m00350[c] + m02553[c] + m02039[c]	116676 or 24188			Vitamin A metabolism	1	-1000	1000	0	1	1.2.1.36		PMID:10559215;PMID:11007799
RCR10275	pyruvate:NAD+ 2-oxidoreductase (CoA-acetylating)	m02819[m] + m02552[m] + m01597[m] --> m01596[m] + m01261[m] + m02553[m] + m02039[m]	(117098 or 29554) and 289950 and 81654 and 298942			Central carbon metabolism	0	0	1000	0	1	1.2.4.1;2.3.1.12;1.8.1.4;1.2.1.51		PMID:11079566;PMID:2643922;PMID:8548923
RCR10276	ATP:pyruvate 2-O-phosphotransferase	m02696[c] + m01285[c] --> m02819[c] + m01371[c]	25630 or 24651 or 114245 or 362605 or 100364062			Central carbon metabolism	0	0	1000	0	1	2.7.1.40		PMID:1009117;PMID:7154942
RCR10277	alpha-D-Glucose 6-phosphate ketol-isomerase	m01389[c] <==> m01968[c]	292804			Central carbon metabolism	1	-1000	1000	0	1	5.3.1.9
RCR10278	b-galactosidase,lysosomal	m02332[l] + m02040[l] --> m01910[l] + m01965[l]	116569			Carbohydrate metabolism	0	0	1000	0	1	3.2.1.108
RCR10279	RCR10279[c]	m01840[c] + m01371[c] --> m01844[c] + m01285[c]	303755 or 313744 or 298250 or 304885 or 498034			Carbohydrate metabolism	0	0	1000	0	1	2.7.1.-
RCR10280	xylitol:NAD oxidoreductase	m03155[c] + m02552[c] --> m02425[c] + m02553[c] + m02039[c]	29470 or 113956			Vitamin C metabolism	0	0	1000	0	1	1.1.1.15		PMID:13373783
RCR10281	(S)-malate:NAD+ oxidoreductase (decarboxylating)	m02439[m] + m02552[m] --> m02819[m] + m01596[m] + m02553[m] + m02039[m]	307270 or 361602			Central carbon metabolism	0	0	1000	0	1	1.1.1.38;1.1.1.39		PMID:15989682;PMID:16171388;PMID:4407365;PMID:4778267;PMID:7757881;PMID:8106447
RCR10282	(S)-Malate:NADP+ oxidoreductase(oxaloacetate-decarboxylating)	m02439[m] + m02554[m] --> m02819[m] + m01596[m] + m02555[m] + m02039[m]	307270 or 361602			Central carbon metabolism	0	0	1000	0	1	1.1.1.38;1.1.1.40		PMID:15989682;PMID:16171388;PMID:1935931;PMID:4407365;PMID:4778267;PMID:7757881;PMID:8106447
RCR10283	GTP:oxaloacetate carboxy-lyase (adding GTP,hosphoenolpyruvate-forming)	m02633[c] + m02034[c] --> m02696[c] + m01948[c] + m01596[c]	362282			Central carbon metabolism	0	0	1000	0	1	4.1.1.32		PMID:11851336;PMID:14505680;PMID:728402;PMID:8325643;PMID:8645161;PMID17211624;PMID17888579;PMID17888580;PMID8325643
RCR10284	(R)-Lactaldehyde:NAD+ oxidoreductase (glutathione-formylating)	m00168[c] + m02553[c] + m02039[c] <==> m01715[c] + m02026[c] + m02552[c]	100145871 or 171178 or 362474 or 310903 or 29646 or 24172			Central carbon metabolism	1	-1000	1000	0	1	1.1.1.1
RCR10285	malonyl-CoA carboxy-lyase (acetyl-CoA-forming)	m02444[c] --> m01596[c] + m01261[c]	85239			Central carbon metabolism	0	0	1000	0	1	4.1.1.9		PMID:101148;PMID:10455107;PMID:15003260;PMID:4180063;PMID:4731972;PMID:5578610;PMID:9869665
RCR10286	D-ribose-5-phosphate aldose-ketose-isomerase	m02845[r] <==> m02846[r]	362383			Pentose phosphate pathway	1	-1000	1000	0	1	5.3.1.6		PMID:14690456;PMID:14988808;PMID:15234337;PMID:2843500
RCR10287	ATP diphosphate-lyase (cyclizing,3',5'-cyclic-AMP-forming)	m01371[c] --> m01419[c] + m02759[c]	25289 or 29241 or 305509 or 54223 or 59320 or 64508 or 64532 or 81636 or 84420			Purine metabolism	0	0	1000	0	1	4.6.1.1;4.6.1.2		PMID:10966920;PMID:15659711;PMID10481931;PMID11299302;PMID11423534;PMID11840511;PMID12503609;PMID12609998;PMID12623444;PMID1427768;PMID14996950;PMID15547246;PMID7860067;PMID7959689;PMID8076676
RCR10288	adenosine 3',5'-phosphate 5'-nucleotidohydrolase	m01419[c] + m02040[c] --> m01334[c]	2462 or 24627 or 25638 or 290646			Purine metabolism	0	0	1000	0	1	3.1.4.17		PMID:10441464;PMID:11368177;PMID:14604994;PMID:17324123;PMID:3007144;PMID17307970
RCR10289	GTP:pyruvate 2-O-phosphotransferase	m02696[c] + m01948[c] --> m02034[c] + m02819[c]	25630 or 24651 or 100364062			Purine metabolism	0	0	1000	0	1	2.7.1.40		PMID:1009117;PMID:7154942
RCR10290	dATP:pyruvate 2-O-phosphotransferase	m02696[c] + m01637[c] --> m01642[c] + m02819[c]	25630 or 24651 or 100364062			Purine metabolism	0	0	1000	0	1	2.7.1.40		PMID:1009117;PMID:7154942
RCR10291	dGTP:pyruvate 2-O-phosphotransferase	m02696[c] + m01680[c] --> m01688[c] + m02819[c]	25630 or 24651 or 100364062			Purine metabolism	0	0	1000	0	1	2.7.1.40		PMID:1009117;PMID:7154942
RCR10292	ATP:GDP phosphotransferase[m]	m02034[m] + m01285[m] <==> m01948[m] + m01371[m]	191575 or 83782 or 171566 or 58964 or 685679 or 688903 or 85269			Purine metabolism	1	-1000	1000	0	1	2.7.4.6		PMID:11768308;PMID9099850
RCR10293	ATP:dGDP phosphotransferase[m]	m01688[m] + m01285[m] --> m01680[m] + m01371[m]	191575 or 83782 or 171566 or 58964 or 685679 or 688903 or 85269			Purine metabolism	0	0	1000	0	1	2.7.4.6		PMID:11768308;PMID:2546816;PMID:2832402;UNIPROT:P15531;PMID9099850
RCR10294	pyruvate kinase	m02696[c] + m01747[c] --> m01753[c] + m02819[c]	25630 or 24651 or 100364062			Pyrimidine metabolism	0	0	1000	0	1	2.7.1.40		PMID:8967971;PMID:10585400
RCR10295	Deoxynucleoside triphosphate:DNA deoxynucleotidyltransferase	0.3 m01753[c] + 0.2 m01645[c] + 0.2 m01688[c] + 0.3 m01642[c] --> m01721[c] + m02759[c]	29240 or 289758 or 59294 or 85241 or 85472 or 60571 or 298098 or 361767 or 304573 or 100362333 or 289757 or 293144 or 304528 or 309812 or 361698 or 288079 or 291526 or 299112 or 303612 or 306672 or 316235 or 362385 or 171525 or 85242 or 102555079			Nucleotide metabolism	0	0	1000	0	1	2.7.7.7
RCR10296	adentylate kinase (GTP)[m]	m01948[m] + m01285[m] <==> m02034[m] + m01334[m]	26956			Nucleotide metabolism	1	-1000	1000	0	1	2.7.4.10		PMID11485571
RCR10297	UMP kinase (UTP),nuclear	2 m03106[n] <==> m03130[n] + m03114[n]	298410			Nucleotide metabolism	1	-1000	1000	0	1	2.7.4.14		PMID10462544;PMID11912132
RCR10298	ATP:UDP phosphotransferase[n]	m03130[n] + m01285[n] <==> m03106[n] + m01371[n]	191575 or 83782			Nucleotide metabolism	1	-1000	1000	0	1	2.7.4.6
RCR10299	cytidylate kinase (CMP),mitochondrial	m01643[n] + m03106[n] <==> m01644[n] + m03130[n]	298410			Nucleotide metabolism	1	-1000	1000	0	1	2.7.4.14		PMID10462544;PMID11912132
RCR10300	cytidylate kinase (CMP,dATP)	m01424[n] + m03106[n] <==> m03130[n] + m01590[n]	298410			Nucleotide metabolism	1	-1000	1000	0	1	2.7.4.14		PMID10462544;PMID11912132
RCR10301	ATP:deoxycitidine 5'-phosphotransferase	m01644[m] + m01285[m] <==> m01668[m] + m01371[m]	79127			Nucleotide metabolism	1	-1000	1000	0	1
RCR10302	ATP:deoxycitidine 5'-phosphotransferase[n]	m01644[n] + m01285[n] <==> m01668[n] + m01371[n]	79127			Nucleotide metabolism	1	-1000	1000	0	1	2.7.1.74
RCR10303	dCMP deaminase	m01644[n] + m03106[n] <==> m01668[n] + m03130[n]	79127			Nucleotide metabolism	1	-1000	1000	0	1	2.7.1.74
RCR10304	deoxycytidine aminohydrolase	m01668[n] + m02040[n] --> m01673[n] + m02578[n]	399679			Nucleotide metabolism	0	0	1000	0	1	3.5.4.5
RCR10305	L-Asparagine amidohydrolase[m]	m01369[m] + m02040[m] --> m01370[m] + m02578[m]	246307 or 246266			Alanine aspartate and glutamate metabolism	0	0	1000	0	1	3.4.19.5
RCR10306	L-glutamate 5-semialdehyde dehydratase (spontaneous)	m00559[c] + m02040[c] <==> m02374[c]	641316			Arginine and proline metabolism	1	-1000	1000	0	1	1.5.1.12	spontaneous
RCR10307	L-Proline:NAD+ 5-oxidoreductase	m00559[c] + m02553[c] + m02039[c] --> m02770[c] + m02552[c]	364064 or 300035 or 287877 or 498299			Arginine and proline metabolism	0	0	1000	0	1	1.5.1.2		PMID:12376638;PMID:12514185;PMID:16730026;PMID:3768405;PMID:6250440;PMID:9003320
RCR10308	L-Proline:NAD+ 5-oxidoreductase[m]	m00559[m] + m02553[m] + m02039[m] --> m02770[m] + m02552[m]	364064 or 300035 or 287877 or 498299			Arginine and proline metabolism	0	0	1000	0	1	1.5.1.2
RCR10309	L-Proline,2-oxoglutarate:oxygen oxidoreductase (4-hydroxylating)	m01306[c] + m02770[c] + m02630[c] --> m03037[c] + m02943[c] + m01596[c]	361612 or 64475 or 360526			Arginine and proline metabolism	0	0	1000	0	1	1.14.11.2
RCR10310	trans-4-Hydroxy-L-proline:NAD+ 5-oxidoreductase	m03037[c] + m02552[c] --> m02320[c] + m02553[c] + m02039[c]	364064 or 300035 or 287877 or 498299			Arginine and proline metabolism	0	0	1000	0	1	1.5.1.2		PMID:12514185;PMID:3768405;PMID:6250440;PMID:675382
RCR10311	RCR10311[c]	m03037[c] + m02630[c] + 2 m02039[c] --> m02320[c] + 2 m02040[c]				Arginine and proline metabolism	0	0	1000	0	1	1.5.99.-
RCR10312	spermidine:NAD+ oxidoreductase	m01661[c] + m02553[c] + m02039[c] <==> m02923[c] + m02552[c]	288923			Arginine and proline metabolism	1	-1000	1000	0	1	2.5.1.46		PMID:9188485
RCR10313	deoxyhypusine synthase	m01670[c] + m00248[c] <==> m02923[c] + m02426[c]	288923			Arginine and proline metabolism	1	-1000	1000	0	1	2.5.1.46		PMID:9188485
RCR10314	L-Arginine amidinohydrolase	m01365[m] + m02040[m] --> m03121[m] + m02658[m]	29221 or 29215			Arginine and proline metabolism	0	0	1000	0	1	3.5.3.1
RCR10315	2-keto-4-methylthiobutyrate transamination	m01016[c] + m01975[c] + 2 m02039[c] --> m02471[c] + m01974[c]				Arginine and proline metabolism	0	0	1000	0	1
RCR10316	L-proline:(acceptor) oxidoreductase	m01802[c] + m02770[c] --> m00559[c] + m01803[c]	361538			Arginine and proline metabolism	0	0	1000	0	1	1.5.99.8
RCR10317	Acetyl-CoA:glycine C-acetyltransferase	m02321[m] + m01597[m] <==> m01986[m] + m01261[m]	100910685 or 366959			Glycine serine and threonine metabolism	1	-1000	1000	0	1	2.3.1.29		PMID10712613
RCR10318	2-Oxoadipate:lipoamde 2-oxidoreductase(decarboxylating and acceptor-succinylating)	m00670[m] + m02393[m] --> m02899[m] + m01596[m]	298942 and 299201 and (290566 or 360975)			Lysine metabolism	0	0	1000	0	1	1.2.4.2		PMID:10676873
RCR10319	L-2-Aminoadipate-6-semialdehyde:NAD+ 6-oxidoreductase	m00631[c] + m02552[c] + m02040[c] --> m02322[c] + m02553[c] + m02039[c]	291450			Lysine metabolism	0	0	1000	0	1	1.2.1.31		PMID:2160277;PMID2160277
RCR10320	Indole-3-acetaldehyde:NAD+ oxidoreductase	m02168[m] + m02552[m] + m02040[m] --> m02169[m] + m02553[m] + m02039[m]	291450 or 29539 or 298079			Aromatic amino acid metabolism	0	0	1000	0	1	1.2.1.4;1.2.1.5		PMID18983992;PMID18983993;PMID6377948
RCR10321	L-phenylalanine carboxy-lyase (phenylethylamine-forming)	m02724[c] --> m02718[c] + m01596[c]	24311			Aromatic amino acid metabolism	0	0	1000	0	1	4.1.1.28
RCR10322	Triiodothyronine Sulfotransferase	m03052[c] + m02682[c] --> m00734[c] + m02681[c]	83783			Aromatic amino acid metabolism	0	0	1000	0	1	2.8.2.1
RCR10323	3-Oxopropanoate:NAD+ oxidoreductase (decarboxylating, CoA-acetylating)	m00661[m] + m02552[m] + m01597[m] --> m00166[m] + m02553[m] + m02039[m]	81708			Valine leucine and isoleucine metabolism	0	0	1000	0	1	1.2.1.18		PMID:10989432;PMID:2768248
RCR10324	2-Methyl-3-oxopropanoate:NAD+ oxidoreductase (CoA-propanoylating)	m00661[m] + m02552[m] + m01597[m] --> m02774[m] + m01596[m] + m02553[m] + m02039[m]	81708			Valine leucine and isoleucine metabolism	0	0	1000	0	1	1.2.1.27		PMID:10989432;PMID:1527093;PMID:2768248;PMID:8120000
RCR10325	L-Leucine:2-oxoglutarate aminotransferase	m01306[c] + m02360[c] --> m01013[c] + m01974[c]	29592			Valine leucine and isoleucine metabolism	0	0	1000	0	1	2.6.1.42;2.6.1.6
RCR10326	RCR10326[c]	m02319[c] + m03109[c] + 2 m02039[c] --> m00787[c] + m03106[c]				Aromatic amino acid metabolism	0	0	1000	0	1
RCR10327	glutamic-oxaloacetic transaminase	m00787[c] + m01306[c] <==> m03152[c] + m01974[c] + m02040[c]	306540			Aromatic amino acid metabolism	1	-1000	1000	0	1	2.6.1.-		PMID:10409626
RCR10328	glutathione transferase	m00787[c] + m02026[c] <==> m01979[c] + m02040[c]				Aromatic amino acid metabolism	1	-1000	1000	0	1	2.5.1.18		PMID:10409626
RCR10329	catechol O-methyltransferase	m02876[c] + m02877[c] --> m02874[c] + m02871[c]	24267 or 308868			Aromatic amino acid metabolism	0	0	1000	0	1	2.1.1.6		PMID:8891913;PMID:10556560
RCR10330	S-Adenosyl-L-methionine:phenylethanolamine N-methyltransferase	m02617[c] + m02877[c] --> m01290[c] + m02871[c]	24661			Aromatic amino acid metabolism	0	0	1000	0	1	2.1.1.28
RCR10331	3-Methoxy-4-hydroxyphenylglycolaldehyde:NAD+ oxidoreductase	m00820[c] + m02552[c] + m02040[c] --> m03136[c] + m02553[c] + m02039[c]	25375 or 266603 or 309147 or 688778			Aromatic amino acid metabolism	0	0	1000	0	1	1.2.1.5		PMID:17379813;PMID:18621017
RCR10332	3,4-Dihydroxymandelaldehyde:NAD+ oxidoreductase	m00726[c] + m02552[c] + m02040[c] --> m00727[c] + m02553[c] + m02039[c]	25375 or 266603 or 309147 or 688778			Aromatic amino acid metabolism	0	0	1000	0	1	1.2.1.5		PMID:10424772;PMID:11958479;PMID:3466164;PMID10424772;PMID12616643
RCR10333	S-Adenosyl-L-methionine:catechol O-methyltransferase	m00727[c] + m02877[c] <==> m03136[c] + m02871[c]	24267 or 308868			Aromatic amino acid metabolism	1	-1000	1000	0	1	2.1.1.6
RCR10334	L-Methionine:oxygen oxidoreductase (deaminating)	m02471[c] + m02630[c] + m02040[c] --> m01016[c] + m02578[c] + m02041[c]	100360621			Cysteine and methionine metabolism	0	0	1000	0	1	1.4.3.2
RCR10335	tyrosine transaminase	m01016[c] + m01974[c] --> m01306[c] + m02471[c]	24813			Cysteine and methionine metabolism	0	0	1000	0	1	2.6.1.5
RCR10336	glutathione:NAD+ oxidoreductase	m02027[c] + m02553[c] + m02039[c] --> 2 m02026[c] + m02552[c]	116686			Glutathione metabolism	0	0	1000	0	1	1.8.1.7		PMID:10781871;PMID:12821209;PMID:237878;PMID:31912;PMID:4380255;PMID:8981046;PMID:9621574;PMID10781871;PMID12821209;PMID237878;PMID31912;PMID4380255;PMID8981046;PMID9621574
RCR10337	glutathione:hydrogen-peroxide oxidoreductase	2 m02026[c] + m02041[c] --> m02027[c] + 2 m02040[c]	113919 or 24404 or 259233 or 29326 or 298376 or 64317			Glutathione metabolism	0	0	1000	0	1	1.11.1.9;1.11.1.15		PMID:12427732;PMID:2229017;PMID:25178;PMID:28781;PMID:4209402;PMID:6882790;PMID:7437054;PMID15802613;PMID17015272;PMID17015273
RCR10338	4-aminobutanal:NAD+ 1-oxidoreductase	m00969[c] + m02552[c] + m02040[c] --> m00970[c] + m02553[c] + m02039[c]	64040			beta-Alanine metabolism	0	0	1000	0	1			PMID8786138
RCR10339	spermidine:(acceptor) oxidoreductase	m02923[c] + m02630[c] + m02040[c] --> m00248[c] + m00969[c] + m02041[c]				beta-Alanine metabolism	0	0	1000	0	1			PMID10657958
RCR10340	1,3-Diaminopropane:oxygen oxidoreductase (deaminating)	m00248[c] + m02630[c] + m02040[c] --> m00760[c] + m02578[c] + m02041[c]	29473 or 65029			beta-Alanine metabolism	0	0	1000	0	1	1.4.3.6;1.4.3.21;1.4.3.22
RCR10341	beta-Aminopropion aldehyde:NAD+ oxidoreductase	m00760[c] + m02552[c] + m02040[c] --> m01383[c] + m02553[c] + m02039[c]	291450 or 29539 or 64040 or 65183 or 298079			beta-Alanine metabolism	0	0	1000	0	1	1.2.1.3
RCR10342	Selenocystathionine Lysteine-lyase (deaminating)	m02888[c] + m02040[c] <==> m02889[c] + m00671[c] + m02578[c]	24962			Cysteine and methionine metabolism	1	-1000	1000	0	1	4.4.1.1
RCR10343	L-Serine hydro-lyase (adding homocysteine)	m02888[c] + m02040[c] --> m02890[c] + m02896[c]	24250			Cysteine and methionine metabolism	0	0	1000	0	1	4.2.1.22
RCR10344	S-Adenosyl-L-methionine:thiol S-methyltransferase	m02895[c] + m02871[c] <==> m02889[c] + m02877[c]				Cysteine and methionine metabolism	1	-1000	1000	0	1	2.1.1.9
RCR10345	(S)-3-methyl-2-oxopentanoate:NAD+ 2-oxidoreductase (CoA-methylbutanoylating)	m00669[m] + m02552[m] + m01597[m] --> m00663[m] + m01596[m] + m02553[m] + m02039[m]	25244 and 29711 and 100359879			Valine leucine and isoleucine metabolism	0	0	1000	0	1	1.2.1.25
RCR10346	L-Aspartate:tRNA(Asp) ligase (AMP-forming)	m03066[c] + m01370[c] + m01371[c] --> m02342[c] + m01334[c] + m02759[c]	304919 or 116483			Protein metabolism	0	0	1000	0	1	6.1.1.12
RCR10347	RCR10347[c]	m02896[c] --> m00205[c] + m02040[c]				Glycan metabolism	0	0	1000	0	1
RCR10348	RCR10348[c]	m03101[c] --> m00206[c] + m02040[c]				Protein metabolism	0	0	1000	0	1
RCR10349	isocitrate:NAD+ oxidoreductase (decarboxylating)	m02183[m] + m02552[m] --> m01306[m] + m01596[m] + m02553[m] + m02039[m]	114096 or 94173 or 25179			Central carbon metabolism	0	0	1000	0	1	1.1.1.41
RCR10350	Isocitrate:NADP+ oxidoreductase (decarboxylating)[m]	m02183[m] + m02554[m] --> m01306[m] + m01596[m] + m02555[m] + m02039[m]	24479 or 361596			Central carbon metabolism	0	0	1000	0	1	1.1.1.42
RCR10351	citrate hydroxymutase[m]	m01587[m] --> m02183[m]	50655 or 79250			Central carbon metabolism	0	0	0	0	1	4.2.1.3		PMID:15263083;PMID:16511074;PMID10419470;PMID17244191;PMID17244192
RCR10352	isocitrate hydro-lyase (cis-aconitate-forming)	m01580[m] + m02040[m] <==> m02183[m]	50655 or 79250			Central carbon metabolism	1	-1000	1000	0	1	4.2.1.3		PMID:15263083;PMID:16511074
RCR10353	2-ketoglutarate dehydrogenase	m02393[m] + m01306[m] --> m02934[m] + m01596[m]	298942 and 299201 and (290566 or 360975)			Central carbon metabolism	0	0	1000	0	1	1.2.4.2		PMID:10676873
RCR10354	glyoxylate oxidase	m02007[c] + m02552[c] + m02040[c] --> m02661[c] + m02553[c] + m02039[c]	24534 or 29634 or 307858 or 691172 or 369018			Central carbon metabolism	0	0	1000	0	1	1.1.1.27		PMID12768081;PMID9038835;PMID9604807;PMID9783918
RCR10355	Butanoate:CoA ligase (AMP-forming)	m01412[c] + m01334[c] + m02759[c] <==> m01410[c] + m01371[c] + m01597[c]	24763 or 361637 or 353317 or 246263 or 361638			Fatty acid metabolism	1	-1000	1000	0	1	6.2.1.2
RCR10356	palmitoyl-CoA hydrolase[p]	m02678[p] + m02040[p] --> m02674[p] + m01597[p]	26759 or 29411 or 29725 or 54398 or 192272 or 406166 or 681337 or 314304 or 50559 or 299193			Fatty acid metabolism	0	0	1000	0	1	3.1.2.2;3.1.2.22		PMID:10092594;PMID:6151837
RCR10357	Malonyl-CoA:[acyl-carrier-protein] S-malonyltransferase	m00184[c] + m02444[c] --> m02442[c] + m01597[c]	50671 or 315173			Fatty acid metabolism	0	0	1000	0	1	2.3.1.85;2.3.1.39		PMID:11750882;PMID:12882974;PMID:4452359;PMID:6137188;PMID:7567999;PMID:7834997;PMID:8962082;PMID11756679;PMID15507492
RCR10358	unspecific monooxygenase	m01362[c] + m01803[c] + m02630[c] --> m00279[c] + m01802[c] + m02040[c]	24296 or 24297 or 25086 or 25426 or 310848 or 246767 or 24307 or 54246 or 308445 or 25147 or 65210 or 24299 or 56266 or 503122 or 293989 or 24894 or 29277 or 29298 or 361523 or 171522 or 24303 or 286953 or 100361492 or 266682 or 170509 or 313373			Arachidonic acid metabolism	0	0	1000	0	1	1.14.14.1		PMID:8651708
RCR10359	unspecific monooxygenase[c]	m01362[c] + m01803[c] + m02630[c] --> m00366[c] + m01802[c] + m02040[c]	24296 or 24297 or 25086 or 25426 or 310848 or 246767 or 24307 or 54246 or 308445 or 25147 or 65210 or 24299 or 56266 or 503122 or 293989 or 24894 or 29277 or 29298 or 361523 or 171522 or 24303 or 286953 or 100361492 or 266682 or 170509 or 313373			Arachidonic acid metabolism	0	0	1000	0	1	1.14.14.1		PMID:8651708
RCR10360	Arachidonate:oxygen 5-oxidoreductase	m01362[c] + m02630[c] --> m01042[c]	25290			Arachidonic acid metabolism	0	0	1000	0	1	1.13.11.34		PMID:3118366;PMID:3164719;PMID:3006030;PMID2829172
RCR10361	Glutathione: 5-HPETE oxidoreductase	m01042[c] + 2 m02026[c] --> m01040[c] + m02027[c] + m02040[c]	24404 or 94167 or 259233 or 29328 or 298376 or 294744 or 113919 or 64317 or 29326			Arachidonic acid metabolism	0	0	1000	0	1	1.11.1.9
RCR10362	arachidonate 12-lipoxygenase	m01040[c] + m02630[c] + 2 m02039[c] --> m02364[c] + m02040[c]	287454			Arachidonic acid metabolism	0	0	1000	0	1	1.13.11.31		PMID:1326548;PMID:7929234
RCR10363	RCR10363[c]	m01123[c] <==> m01124[c]				Arachidonic acid metabolism	1	-1000	1000	0	1			PMID:1326548;PMID:7929234
RCR10364	arachidonate 5-lipoxygenase	m00380[c] + m02630[c] --> m01058[c] + m02041[c]	25290			Arachidonic acid metabolism	0	0	1000	0	1	1.13.11.34		PMID:9870464;PMID:11323741
RCR10365	arachidonate:oxygen 12-oxidoreductase	m01362[c] + m02630[c] --> m00309[c]	287454			Arachidonic acid metabolism	0	0	1000	0	1	1.13.11.31		PMID2217179;PMID2377602
RCR10366	arachidonate 12-lipoxygenase[c]	m00309[c] + 2 m02026[c] --> m00307[c] + m02027[c] + m02040[c]	287454			Arachidonic acid metabolism	0	0	1000	0	1	1.13.11.31
RCR10367	arachidonate 5-lipoxygenase[c]	m00307[c] + m02630[c] + 2 m02039[c] --> m02364[c] + m02040[c]	25290			Arachidonic acid metabolism	0	0	1000	0	1	1.13.11.34		PMID:9837935;PMID:2377602;PMID:10224163
RCR10368	carbonyl reductase (NADPH)	m02364[c] + m02552[c] --> m00326[c] + m02553[c] + m02039[c]	266686 or 29224 or 304078 or 100360507			Eicosanoid metabolism	0	0	1000	0	1	1.1.1.184		PMID:9862787;PMID:11368003;PMID:9799565
RCR10369	carbonyl reductase (NADPH)[p]	m02364[p] + m02554[p] --> m00326[p] + m02555[p] + m02039[p]	266686 or 29224 or 304078 or 100360507			Eicosanoid metabolism	0	0	1000	0	1	1.1.1.184		PMID:7929234;PMID:1326548
RCR10370	aldehyde reductase 1	m02364[p] + m02552[p] --> m00326[p] + m02553[p] + m02039[p]	266686 or 29224 or 304078 or 100360507			Eicosanoid metabolism	0	0	1000	0	1	1.1.1.184		PMID:9862787;PMID:11368003;PMID:9799565
RCR10371	RCR10371[c]	m01118[c] <==> m01123[c]				Eicosanoid metabolism	1	-1000	1000	0	1			PMID:1326548;PMID:7929234
RCR10372	long-chain acyl-coenzyme A synthetase	m00258[c] + m01334[c] + m02759[c] <==> m00257[c] + m01371[c] + m01597[c]	113976 or 171410 or 25288 or 94340 or 117243 or 301120 or 114024 or 65192			Eicosanoid metabolism	1	-1000	1000	0	1	6.2.1.3		PMID:9784915
RCR10373	RCR10373[c]	m00252[c] <==> m00257[c]				Eicosanoid metabolism	1	-1000	1000	0	1			PMID:9862787;PMID:8244977
RCR10374	RCR10374[c]	m01628[c] --> m00200[c] + m02040[c]				Electron transport chain	0	0	1000	0	1
RCR10375	iodide peroxidase	m00739[c] + m00807[c] + m02041[c] --> m01654[c] + m03052[c] + 2 m02040[c]	54314			Steroid metabolism	0	0	0	0	1	1.11.1.8	problematic
RCR10376	Beta-1,3-galactosyltransferase 3	m01960[g] + m03110[g] --> m01959[g] + m03106[g]	310508			Sphingolipid metabolism	0	0	1000	0	1	2.4.1.79
RCR10377	Alpha-N-acetylgalactosaminide alpha-2,6-sialyltransferase 3	m02010[g] + m01592[g] --> m01942[g] + m01590[g]	29758 or 407765 or 407764 or 365984			Sphingolipid metabolism	0	0	1000	0	1	2.4.99.-;2.4.99.7
RCR10378	Alpha-N-acetylgalactosaminide alpha-2,6-sialyltransferase 2	m01942[g] + m01592[g] --> m02029[g] + m01590[g]	303692			Sphingolipid metabolism	0	0	1000	0	1	2.4.99.-
RCR10379	galactokinase	m01947[g] + m03110[g] --> m01946[g] + m03106[g]	64828			Sphingolipid metabolism	0	0	1000	0	1	2.4.1.92
RCR10380	1-Alkyl-2-acetyl-sn-glycero-3-phosphocholine acetohydrolase[c]	m00626[c] + m02040[c] --> m00516[c] + m01252[c]	64189 or 83572 or 114113 or 246266 or 313611			Glycerolipid metabolism	0	0	1000	0	1	3.1.1.47
RCR10381	Acetyl-CoA:1-alkyl-sn-glycero-3-phosphocholine 2-O-acetyltransferase[c]	m00516[c] + m01261[c] --> m00626[c] + m01597[c]	296048 or 100359680 or 361467			Glycerolipid metabolism	0	0	1000	0	1
RCR10382	beta-1,3-galactosyltransferase 5	m01959[c] + m03107[c] --> m01912[c] + m03106[c]	288161			Sphingolipid metabolism	0	0	1000	0	1	2.4.1.-
RCR10383	beta-galactoside alpha-2,3-sialyltransferase	m01912[c] + m01592[c] --> m02491[c] + m01590[c]	64442 or 363040 or 362924			Sphingolipid metabolism	0	0	1000	0	1	2.4.99.4
RCR10384	galactoside 2-alpha-L-fucosyltransferase	m01912[c] + m01950[c] --> m01958[c] + m01948[c]	81919 or 58924 or 308586			Sphingolipid metabolism	0	0	1000	0	1	2.4.1.69		PMID2118655;PMID7876235
RCR10385	galactoside 2-alpha-L-fucosyltransferase[c]	m02347[c] + m01950[c] --> m02195[c] + m01948[c]	81919 or 58924 or 308586			Sphingolipid metabolism	0	0	1000	0	1	2.4.1.69		PMID2118655;PMID7876235
RCR10386	3-galactosyl-N-acetylglucosaminide 4-alpha-L-fucosyltransferase	m02195[c] + m01950[c] --> m02194[c] + m01948[c]	58924			Sphingolipid metabolism	0	0	1000	0	1	2.4.1.65		PMID10545162
RCR10387	blood group H alpha-2-fucosyltransferase	m02594[c] + m01950[c] --> m03137[c] + m01948[c]	81919 or 58924 or 308586			Sphingolipid metabolism	0	0	1000	0	1	2.4.1.69		PMID2118655;PMID7876235
RCR10388	UDP-alpha-D-galactose:N-acylsphingosine D-galactosyltransferase	m01430[c] + m03107[c] --> m01679[c] + m03106[c]	50555			Sphingolipid metabolism	0	0	1000	0	1	2.4.1.45		PMID:9125199;PMID:423891
RCR10389	dolichyl-phosphate-mannose-protein mannosyltransferase	m02645[c] + m01733[c] <==> m01734[c] + m00205[c]	84430 or 688673			Inositol phosphate metabolism	1	-1000	1000	0	1	2.4.1.109
RCR10390	(5Z,13E)-(15S)-9alpha,11alpha-Epidioxy-15-hydroxyprosta-5,13- dienoate D-isomerase[c]	m02794[c] --> m02783[c]	25526 or 58962			Eicosanoid metabolism	0	0	1000	0	1	5.3.99.2		PMID9065498;PMID9353279
RCR10391	Acyl-CoA:1-alkenylglycerophosphoethanolamine O-acyltransferase	m00223[c] + m01276[c] --> m02629[c] + m01597[c]	361467 or 362434 or 100359680 or 296048			Glycerolipid metabolism	0	0	1000	0	1	2.3.1.23
RCR10392	5beta-Cholestane-3alpha,7alpha,12alpha,26-tetraol:NAD+ 26-oxidoreductase	m01090[m] + m02552[m] --> m00750[m] + m02553[m] + m02039[m]	301517			Bile acid metabolism	0	0	1000	0	1	1.14.13.15
RCR10393	cholestanetriol 26-monooxygenase	m01090[m] + m02554[m] --> m00750[m] + m02555[m] + m02039[m]	301517			Bile acid metabolism	0	0	1000	0	1	1.14.13.15		PMID:1708392;PMID:9660774
RCR10394	3alpha,7alpha,12alpha-trihydroxy-5beta-cholestanoate:CoA ligase (AMP-forming)	m00752[c] + m01371[c] + m01597[c] --> m00616[c] + m01334[c] + m02759[c]	79111 or 65192			Bile acid metabolism	0	0	1000	0	1	6.2.1.7		PMID:10479480;PMID:10749848;PMID:11980911
RCR10395	bile-salt sulfotransferase	m01435[c] + m02682[c] + m02039[c] --> m02950[c] + m02681[c]	24912 or 24902			Bile acid metabolism	0	0	1000	0	1	2.8.2.14
RCR10396	steryl-sulfatase	m02950[c] + m02040[c] --> m01435[c] + m02946[c] + m02039[c]	24800			Bile acid metabolism	0	0	1000	0	1	3.1.6.2		PMID:1606923;PMID:10049998
RCR10397	RCR10397[m]	2 m00918[m] + m02630[m] --> 2 m02350[m]				Bile acid metabolism	0	0	1000	0	1
RCR10398	ATP:NAD+ 2'-phosphotransferase[m]	m02552[m] + m01371[m] --> m01285[m] + m02554[m]	365699 or 100125370			Vitamin B metabolism	0	0	1000	0	1	2.7.1.23		PMID:11594753
RCR10399	NAD+ glycohydrolase	m02552[c] + m02040[c] --> m01288[c] + m02583[c] + m02039[c]	25668 or 81506			Vitamin B metabolism	0	0	1000	0	1	3.2.2.5		PMID8382685
RCR10400	S-Adenosyl-L-methionine:nicotinamide N-methyltransferase	m02583[c] + m02877[c] + m02039[c] --> m00536[c] + m02871[c]	300691			Vitamin B metabolism	0	0	1000	0	1	2.1.1.1
RCR10401	[Acyl-carrier-protein] 4'-pantetheine-phosphohydrolase	m00184[c] + m02040[c] --> m01349[c] + m02741[c]				Vitamin B metabolism	0	0	1000	0	1	3.1.4.14		PMID:220505;PMID:5671058
RCR10402	CoA:apo-[acyl-carrier-protein] pantetheinephosphotransferase	m01349[c] + m01597[c] --> m00184[c] + m02681[c]	300328			Vitamin B metabolism	0	0	1000	0	1	2.7.8.-		PMID:12815048;PMID:4561013
RCR10403	ATP:pantothenate 4'-phosphotransferase	m02680[c] + m01371[c] --> m01636[c] + m01285[c]	171053 or 294088 or 296167 or 360511			Vitamin B metabolism	0	0	1000	0	1	2.7.1.33		PMID:10625688;PMID:11923312;PMID:13630913;PMID:15105273;PMID:15659606;PMID:15893380;PMID:16040613;PMID:17242360;PMID:2995137;PMID:2999132;PMID:4337331;PMID:7084227
RCR10404	ATP:1-phosphatidyl-1D-myo-inositol-4,5-bisphosphate 3-phosphotransferase	m02736[c] + m01371[c] --> m02734[c] + m01285[c]	170911 or 298947 or 366508 or 85243			Inositol phosphate metabolism	0	0	1000	0	1	2.7.1.153
RCR10405	ATP:1D-myo-inositol-1,3,4-trisphosphate 5-phosphotransferase	m00524[c] + m01371[c] --> m00522[c] + m01285[c]	500709			Inositol phosphate metabolism	0	0	1000	0	1	2.7.1.159
RCR10406	1-phosphatidylinositol-4-phosphate 5-kinase	m02750[r] + m01371[r] --> m00554[r] + m01285[r]	314641 or 309419 or 365865 or 687758			Inositol phosphate metabolism	0	0	1000	0	1	2.7.1.68		PMID:9211928;PMID:10231032;PMID:11493657;PMID:10358929
RCR10407	phosphatidylinositol-3,4,5-trisphosphate 3-phosphatase	m00554[r] + m02040[r] --> m02750[r] + m02751[r]	50557 or 364629			Inositol phosphate metabolism	0	0	1000	0	1	3.1.3.67		PMID:7556092;PMID:9367831;PMID7556092;PMID9367831
RCR10408	1-phosphatidylinositol-4-phosphate 5-kinase[c]	m00551[c] + m01371[c] --> m02734[c] + m01285[c]	314641 or 309419 or 365865 or 687758			Inositol phosphate metabolism	0	0	1000	0	1	2.7.1.68		PMID:9211928;PMID:10231032;PMID:11493657;PMID:10358929
RCR10409	1-phosphatidyl-1D-myo-inositol-3,4,5-trisphosphate 5-phosphohydrolase	m02734[n] + m02040[n] --> m00551[n] + m02751[n]	54259 or 65038			Inositol phosphate metabolism	0	0	1000	0	1			PMID12728269
RCR10410	1-Phosphatidyl-1D-myo-inositol 3,4-bisphosphate 3-phosphohydrolase	m00551[n] + m02040[n] --> m00553[n] + m02751[n]	288762			Inositol phosphate metabolism	0	0	1000	0	1			PMID12728269
RCR10411	1-phosphatidyl-1D-myo-inositol-3,4-bisphosphate 4-phosphohydrolase	m00551[n] + m02040[n] --> m00552[n] + m02751[n]	116699			Inositol phosphate metabolism	0	0	1000	0	1			PMID12728269
RCR10412	1-Phosphatidyl-1D-myo-inositol 3-phosphate 3-phosphohydrolase	m00552[n] + m02040[n] --> m02750[n] + m02751[n]	288762			Inositol phosphate metabolism	0	0	1000	0	1			PMID12728269
RCR10413	phosphatidylinositol 3-phosphate 4-kinase, nuclear	m00552[n] + m01371[n] --> m00551[n] + m01285[n]	314641 or 309419 or 365865 or 687758			Inositol phosphate metabolism	0	0	1000	0	1
RCR10414	ATP:1-Phosphatidyl-1D-myo-inositol 4-phosphotransferase[n]	m00553[n] + m02040[n] --> m02750[n] + m02751[n]				Inositol phosphate metabolism	0	0	1000	0	1			PMID7556092
RCR10415	phosphatidylinositol-5-phosphate 3-kinase, endoplasmic reticulum	m00554[r] + m01371[r] --> m02735[r] + m01285[r]	116720 or 289021 or 361632			Inositol phosphate metabolism	0	0	1000	0	1	2.7.1.154
RCR10416	ATP:1-phosphatidyl-1D-myo-inositol 3-phosphotransferase	m02750[n] + m01371[n] --> m00552[n] + m01285[n]	65052			Inositol phosphate metabolism	0	0	1000	0	1
RCR10417	phosphatidylinositol phospholipase C, nucleus	m02750[n] + m02040[n] --> m02173[n] + m00240[n]	24654			Inositol phosphate metabolism	0	0	1000	0	1	3.1.4.11
RCR10418	5,10-methylenetetrahydrofolate:NAD+ oxidoreductase[m]	m01044[m] + m02553[m] <==> m01045[m] + m02552[m]	305248 or 680308 or 292536			Vitamin B metabolism	1	-1000	1000	0	1	1.5.1.15		PMID:12024029;PMID:1392622;PMID:16171773;PMID:3258307;PMID:8218174;PMID8218174
RCR10419	2,3-dioxo-L-gulonate:hydrogen peroxide oxireductase	m00573[c] + m02040[c] --> m02424[c] + m01596[c]				Vitamin C metabolism	0	0	1000	0	1			PMID9296457
RCR10420	Dolichyl-diphosphooligosaccharide:protein-L-asparagine oligopolysaccharidotransferase (liver)	m00573[c] + m02041[c] --> m02992[c] + m02661[c]				Vitamin C metabolism	0	0	1000	0	1		problematic
RCR10421	Dolichyl-diphosphooligosaccharide:protein-L-asparagine oligopolysaccharidotransferase (uterus)	m00573[c] + m02040[c] --> m02359[c] + m02661[c]				Vitamin C metabolism	0	0	1000	0	1
RCR10422	retinol:NAD+ oxidoreductase	m02834[c] + m02552[c] --> m02832[c] + m02553[c] + m02039[c]	100145871 or 171178 or 362474 or 310903 or 286964 or 29646 or 24172 or 366791 or 297805 or 100362350			Vitamin A metabolism	0	0	1000	0	1	1.1.1.1;1.1.1.105		PMID10329026;PMID12226107;PMID12534290;PMID1503811
RCR10423	RCR10423[c]	m01231[c] <==> m02833[c]				Vitamin A metabolism	1	-1000	1000	0	1			PMID:9647871
RCR10424	RCR10424[r]	m01231[r] <==> m02833[r]				Vitamin A metabolism	1	-1000	1000	0	1			PMID:9647871
RCR10425	RCR10425[r]	m00349[r] <==> m02832[r]				Vitamin A metabolism	1	-1000	1000	0	1			PMID:9647871
RCR10426	all-trans-Retinol 11-cis-trans-isomerase	m00291[c] <==> m02834[c]				Vitamin A metabolism	1	-1000	1000	0	1
RCR10427	5-Hydroxy-L-tryptophan decarboxy-lyase	m01107[c] --> m02897[c] + m01596[c]	24311			Serotonin and melatonin biosynthesis	0	0	1000	0	1	4.1.1.28		PMID:11513473
RCR10428	5-Hydroxytryptamine:oxygen oxidoreductase(deaminating)(flavin-containing)	m02897[c] + m02630[c] + m02040[c] --> m01102[c] + m02578[c] + m02041[c]	25750 or 29253			Serotonin and melatonin biosynthesis	0	0	1000	0	1	1.4.3.4
RCR10429	vitamin D3 24-hydroxylase	m01415[m] + m02555[m] + m02630[m] + m02039[m] --> m00035[m] + m02554[m] + m02040[m]	25279			Vitamin D metabolism	0	0	1000	0	1	1.14.13.126		PMID:12466393;PMID:12485911;PMID15358094;PMID8266831
RCR10430	vitamin D3 24-hydroxylase[m]	m00035[m] + m02553[m] + m02630[m] + m02039[m] --> m01416[m] + m02552[m] + m02040[m]	25279			Vitamin D metabolism	0	0	1000	0	1	1.14.13.126
RCR10431	1a,24,25VITD3Hm	m00035[m] + m02555[m] + m02630[m] + m02039[m] --> m01416[m] + m02554[m] + m02040[m]				Vitamin D metabolism	0	0	1000	0	1			PMID15574355
RCR10432	calcidiol,NADPH:oxygen oxidoreductase (1-hydroxylating)	m01415[m] + m02555[m] + m02630[m] + m02039[m] --> m01417[m] + m02554[m] + m02040[m]	80848 and 114700 and 24384 and 29216			Vitamin D metabolism	0	0	1000	0	1			PMID14671156;PMID9333115
RCR10433	(1R,2S)-naphthalene 1,2-oxide hydrolase	m00032[c] + m02040[c] --> m00243[c]	25315			Xenobiotics metabolism	0	0	1000	0	1	3.3.2.9
RCR10434	(1S,2R)-naphthalene 1,2-oxide hydrolase	m00034[c] + m02040[c] --> m00243[c]	25315			Xenobiotics metabolism	0	0	1000	0	1	3.3.2.9
RCR10435	chloride:hydrogen-peroxide oxidoreductase (hypochlorite-forming)	m02156[c] + m02039[c] + m02040[c] --> m01442[c] + m02041[c]	94167 or 287610 or 303414 or 554172			Xenobiotics metabolism	0	0	1000	0	1	1.11.1.7	problematic	PMID:10753880
RCR10436	diphosphate phosphohydrolase[n]	m02759[n] + m02040[n] --> 2 m02751[n]	294504 or 310664 or 310856 or 361663			Miscellaneous	0	0	1000	0	1
RCR10437	Nomega,Nomega'-dimethyl-L-arginine dimethylamidohydrolase	m02577[c] + m02040[c] --> m01707[c] + m01588[c]	64157 or 294239			Miscellaneous	0	0	1000	0	1	3.5.3.18
RCR10438	NADH:(quinone-acceptor) oxidoreductase	m03145[c] + m02553[c] + m02039[c] <==> m02829[c] + m02552[c]	24314 or 291084			Miscellaneous	1	-1000	1000	0	1	1.6.5.2;1.10.99.2
RCR10439	RCR10439[c]	0.64 m00496[c] + 0.122 m00495[c] + 0.082 m00499[c] + 0.0741 m00491[c] + 0.0286 m00461[c] + 0.0208 m00474[c] + 0.0096 m00493[c] + 0.0048 m00479[c] + 0.0037 m00492[c] + 0.0028 m00457[c] + 0.0024 m00472[c] + 0.0017 m00459[c] + 0.0013 m00452[c] + 0.0013 m00476[c] + 5e-04 m00450[c] + 1e-04 m00436[c] + 1e-04 m00437[c] + 1e-04 m00438[c] + 1e-04 m00439[c] + 1e-04 m00440[c] + 1e-04 m00441[c] + 1e-04 m0044…				Biomass	0	0	1000	0	1			PMID:16137923
RCR10440	calcitriol,NADPH:oxygen oxidoreductase (24-hydroxylating)	m01417[m] + m02555[m] + m02630[m] + m02039[m] --> m01416[m] + m02554[m] + m02040[m]	25279			Vitamin D metabolism	0	0	1000	0	1	1.14.13.126		PMID15574355
RCR10441	(S)-Lactate:NAD+ oxidoreductase[c]	m02819[c] + m02553[c] + m02039[c] <==> m02403[c] + m02552[c]	24534 or 29634 or 691172 or 369018			Central carbon metabolism	1	-1000	1000	0	1	1.1.1.27		PMID:12042361;PMID:17045662;PMID:7449128;PMID:9927705
RCR10442	ATP:pyruvate,water phosphotransferase	m02819[c] + m01371[c] + m02040[c] --> m02696[c] + m01334[c] + m02751[c]				Central carbon metabolism	0	0	1000	0	1	2.7.9.2
RCR10443	2-phospho-D-glycerate hydro-lyase (phosphoenolpyruvate-forming)	m00674[c] <==> m02696[c] + m02040[c]	24333 or 24334 or 25438 or 100911625			Central carbon metabolism	1	-1000	1000	0	1	4.2.1.11		PMID:3536714;PMID:7357031;PMID5939;PMID6626557
RCR10444	D-phosphoglycerate 2,3-phosphomutase	m00674[c] <==> m00913[c]	24959 or 24642 or 296973			Central carbon metabolism	1	-1000	1000	0	1	5.4.2.1;5.4.2.4		PMID:2840859;PMID:6322090;PMID:9688259;PMID254224;PMID28245076;PMID28245077
RCR10445	3-Phospho-D-glyceroyl phosphate phosphohydrolase	m00247[c] + m02040[c] --> m00913[c] + m02751[c]	299203 or 364224			Central carbon metabolism	0	0	1000	0	1	3.6.1.7
RCR10446	pyruvate dehydrogenase (acetyl-transferring)	m02393[m] + m02819[m] --> m02869[m] + m01596[m]	(117098 or 29554) and 289950			Central carbon metabolism	0	0	1000	0	1	1.2.4.1		PMID:18032470;PMID:2323578;PMID:2748588
RCR10447	D-glucose 1-epimerase	m01388[c] <==> m01965[c]	313843			Central carbon metabolism	1	-1000	1000	0	1	5.1.3.3
RCR10448	ATP:beta-D-glucose 6-phosphotransferase	m01388[c] + m01371[c] --> m01389[c] + m01285[c]	24385 or 25059 or 25060 or 25058 or 100364027			Central carbon metabolism	0	0	1000	0	1	2.7.1.1;2.7.1.2
RCR10449	ADP:D-glucose 6-phosphotransferase	m01388[c] + m01285[c] --> m01389[c] + m01334[c]	315722			Central carbon metabolism	0	0	1000	0	1	2.7.1.147
RCR10450	Maltodextrin glucosidase (maltotriose), lysosome	m02452[l] + m02040[l] --> m02450[l] + m01965[l]	367562			Central carbon metabolism	0	0	1000	0	1	3.2.1.20
RCR10451	alpha-amylase	m02450[c] + m02040[c] --> 2 m01840[c]	364745 or 497039 or 24203			Central carbon metabolism	0	0	1000	0	1	3.2.1.1
RCR10452	maltose glucohydrolase[c]	m02450[c] + m02040[c] --> 2 m01965[c]	24382 or 312272			Central carbon metabolism	0	0	1000	0	1	3.2.1.20
RCR10453	galactokinase[c]	m01910[c] + m01371[c] --> m01322[c] + m01285[c]	287835 or 296117			Carbohydrate metabolism	0	0	1000	0	1	2.7.1.6
RCR10454	ATP:alpha-D-galactose 1-phosphotransferase	m01910[c] + m01371[c] --> m01911[c] + m01285[c]	287835 or 296117 or 296118			Carbohydrate metabolism	0	0	1000	0	1	2.7.1.6		PMID:8908517
RCR10455	GDP:D-mannose-1-phosphate guanylyltransferase	m02454[c] + m01948[c] --> m01951[c] + m02751[c]	501167 or 100190936 or 363145 or 316003			Carbohydrate metabolism	0	0	1000	0	1	2.7.7.22;2.7.7.13		PMID:13876695
RCR10456	GTP:alpha-D-mannose-1-phosphate guanylyltransferase	m02454[c] + m02034[c] --> m01951[c] + m02759[c]	501167 or 363145 or 316003			Carbohydrate metabolism	0	0	1000	0	1	2.7.7.13		PMID:10025667;PMID:8549746;PMID:9451026
RCR10457	GDP-alpha-D-mannose 4,6-hydro-lyase (GDP-4-dehydro-alpha-D-rhamnose-forming)	m01951[c] --> m01949[c] + m02040[c]	291095			Carbohydrate metabolism	0	0	1000	0	1	4.2.1.47		PMID:9893952
RCR10458	UDPglucuronate uridine-monophosphohydrolase	m03109[c] + m02040[c] --> m01684[c] + m03114[c]	295051			Vitamin C metabolism	0	0	1000	0	1	2.4.1.117
RCR10459	Glucuronate 1-phosphate phosphatase	m01684[c] + m02040[c] --> m01973[c] + m02751[c]				Vitamin C metabolism	0	0	1000	0	1
RCR10460	Propanoate:CoA ligase (AMP-forming)	m02774[c] + m01334[c] + m02759[c] <==> m02772[c] + m01371[c] + m01597[c]	311569 or 296259 or 314800			Central carbon metabolism	1	-1000	1000	0	1	6.2.1.17;6.2.1.1;3.1.2.2		PMID:11013297;PMID:10843999;PMID:11150295;PMID:1924964;PMID:2009071;PMID:7341659;PMID10843999;PMID12623130
RCR10461	AKBDHm	m00671[m] + m02552[m] + m01597[m] --> m02774[m] + m01596[m] + m02553[m] + m02039[m]				Central carbon metabolism	0	0	1000	0	1	1.2.7.2		PMID:2649080;PMID:283398;PMID:3718468;PMID:9381974
RCR10462	3-Oxopropanoate:NAD+ oxidoreductase (decarboxylating, CoA-acetylating)[m]	m00900[m] + m02552[m] + m01597[m] --> m01596[m] + m01261[m] + m02553[m] + m02039[m]	81708			Central carbon metabolism	0	0	1000	0	1	1.2.1.18;1.2.1.27		PMID:10989432;PMID:1527093;PMID:2768248;PMID:4285894
RCR10463	3-hydroxypropanoate:NAD+ oxidoreductase	m02142[m] + m02552[m] --> m00900[m] + m02553[m] + m02039[m]	298298			Central carbon metabolism	0	0	1000	0	1	1.1.1.59		PMID:13672942;PMID13672942
RCR10464	3-hydroxyisobutyryl-CoA hydrolase	m00799[m] + m02040[m] --> m02142[m] + m01597[m]	301384			Central carbon metabolism	0	0	1000	0	1	3.1.2.4		PMID:10989434;PMID:8188708;PMID:8824301
RCR10465	Acetyl-CoA:acetyl-CoA C-acetyltransferase[c]	m01255[c] + m01597[c] <==> 2 m01261[c]	308100 or 365096			Central carbon metabolism	1	-1000	1000	0	1	2.3.1.9		PMID:10064897;PMID:10806397;PMID:1121274;PMID:11330060;PMID:15733928;PMID:1679347;PMID:16927236;PMID:17236799;PMID:1735445;PMID:1979337;PMID:3194209;PMID:6131897;PMID:6378901;PMID:7911016;PMID:8241273
RCR10466	Acetoacetate:CoA ligase (AMP-forming)[c]	m01253[c] + m01371[c] + m01597[c] --> m01255[c] + m01334[c] + m02759[c]	65984			Central carbon metabolism	0	0	1000	0	1	6.2.1.16		PMID:4073493;PMID12623130
RCR10467	(R)-3-Hydroxybutanoate:NAD+ oxidoreductase	m00157[m] + m02552[m] <==> m01253[m] + m02553[m] + m02039[m]	117099 or 295458			Central carbon metabolism	1	-1000	1000	0	1	1.1.1.30		PMID:1639787;PMID:3355176;PMID:3705199;PMID:475768;PMID:719045;PMID:7686368;PMID:8608144;PMID:8679568;PMID1639787;PMID8679568
RCR10468	ATP:Sedoheptulose 7-phosphate 1-phosphotransferase	m02883[c] + m01285[c] <==> m02884[c] + m01371[c]	60416 or 25741 or 65152			Pentose phosphate pathway	1	-1000	1000	0	1	2.7.1.11		PMID:4084320;PMID:4272358
RCR10469	6-Phospho-D-glucono-1,5-lactone lactonohydrolase	m01961[r] + m02040[r] --> m01169[r]	298655 or 290636			Pentose phosphate pathway	0	0	1000	0	1	3.1.1.31		PMID:3858849;PMID:3932573;PMID:6852020;PMID:971315
RCR10470	6-Phospho-D-glucono-1,5-lactone lactonohydrolase[c]	m01961[c] + m02040[c] --> m01169[c]	298655 or 290636			Pentose phosphate pathway	0	0	1000	0	1	3.1.1.31		PMID:3858849;PMID:3932573;PMID:6852020;PMID:971315
RCR10471	2-deoxy-D-ribose 1-phosphate 1,5-phosphomutase	m00639[c] <==> m00640[c]	289632			Pentose phosphate pathway	1	-1000	1000	0	1	5.4.2.7		PMID:3023765;PMID3023765;PMID17804405;PMID6297594
RCR10472	ADP phosphohydrolase	m01285[c] + m02040[c] --> m01334[c] + m02751[c]	246272 or 64467 or 64519 or 85260 or 314312 or 613267 or 316077 or 361063			Purine metabolism	0	0	1000	0	1	3.6.1.5;3.6.1.6		PMID:11278936
RCR10473	adenosine 5'-monophosphate phosphohydrolase	m01334[c] + m02040[c] --> m01280[c] + m02751[c]	56780 or 360629 or 312373 or 58813 or 298881 or 287368 or 313574 or 100360582 or 100363253 or 288489			Purine metabolism	0	0	1000	0	1	3.1.3.5		PMID:1550832;PMID11133996
RCR10474	adenosine 5'-monophosphate phosphohydrolase[m]	m01334[m] + m02040[m] --> m01280[m] + m02751[m]	56780 or 360629 or 312373 or 58813 or 298881 or 287368 or 313574 or 100360582 or 100363253 or 288489			Purine metabolism	0	0	1000	0	1	3.1.3.5		PMID:1550832;PMID1550832
RCR10475	ATP:GMP phosphotransferase	m01948[c] + m01285[c] <==> m02016[c] + m01371[c]	303179			Purine metabolism	1	-1000	1000	0	1	2.7.4.8		PMID:8663313
RCR10476	Xanthosine-5'-phosphate:L-glutamine amido-ligase (AMP-forming)	m03150[c] + m01975[c] + m01371[c] + m02040[c] --> m02016[c] + m01974[c] + m01334[c] + m02759[c]	295088			Purine metabolism	0	0	1000	0	1	6.3.5.2		PMID:3436958;PMID:6260205;PMID:8089153
RCR10477	Guanosine 3',5'-cyclic phosphate 5'-nucleotidohydrolase	m01433[c] + m02040[c] --> m02016[c]	171115 or 191569			Purine metabolism	0	0	1000	0	1	3.1.4.17;3.1.4.35		PMID:14604994;PMID17307970;PMID9624146
RCR10478	GTP diphosphohydrolase (diphosphate-forming)	m02034[c] + m02040[c] --> m02016[c] + m02759[c]	311422			Purine metabolism	0	0	1000	0	1	3.6.1.19;3.6.1.8		PMID:11278832;PMID:4310599
RCR10479	Xanthosine-5'-phosphate:ammonia ligase (AMP-forming)	m03150[c] + m02578[c] + m01371[c] --> m02016[c] + m01334[c] + m02759[c]	295088			Purine metabolism	0	0	1000	0	1	6.3.4.1		PMID:6260205;PMID:6698284;PMID:7559506;PMID:7706277;PMID:8089153
RCR10480	2'-Deoxyadenosine 5'-triphosphate:oxydized-thioredoxin 2'-oxidoreductase	m02990[c] + m01371[c] --> m02666[c] + m01642[c] + m02040[c]	685579 and 362720 and 299976			Purine metabolism	0	0	1000	0	1	1.17.4.1		PMID:6121703;PMID:8074691;PMID6121703;PMID8074691
RCR10481	2'-Deoxyadenosine 5'-diphosphate:oxidized-thioredoxin 2'-oxidoreductase	m02990[c] + m01285[c] --> m02666[c] + m01637[c] + m02040[c]	685579 and 362720 and 299976			Purine metabolism	0	0	1000	0	1	1.17.4.1		PMID:6121703;PMID:8074691;PMID14729598
RCR10482	2'-Deoxyguanosine 5'-triphosphate:oxydized-thioredoxin 2'-oxidoreductase	m02990[c] + m02034[c] --> m02666[c] + m01688[c] + m02040[c]	685579 and 362720 and 299976			Purine metabolism	0	0	1000	0	1	1.17.4.1		PMID:6121703;PMID:8074691;PMID6121703;PMID8074691
RCR10483	2'-Deoxyguanosine 5'-diphosphate:oxidized-thioredoxin 2'-oxidoreductase	m02990[c] + m01948[c] --> m02666[c] + m01680[c] + m02040[c]	685579 and 362720 and 299976			Purine metabolism	0	0	1000	0	1	1.17.4.1		PMID:6121703;PMID:8074691;PMID14729598
RCR10484	2'-Deoxycytidine diphosphate:oxidized-thioredoxin 2'-oxidoreductase	m02990[c] + m01424[c] --> m02666[c] + m01643[c] + m02040[c]	685579 and 362720 and 299976			Purine metabolism	0	0	1000	0	1	1.17.4.1		PMID:6121703;PMID:8074691;PMID14729598
RCR10485	2'-Deoxyuridine 5'-diphosphate:oxidized-thioredoxin 2'-oxidoreductase	m02990[c] + m03106[c] --> m02666[c] + m01754[c] + m02040[c]	685579 and 362720 and 299976			Purine metabolism	0	0	1000	0	1	1.17.4.1		PMID:6121703;PMID:8074691;PMID14729598
RCR10486	xanthine:NAD+ oxidoreductase	m03148[c] + m02552[c] + m02040[c] --> m03120[c] + m02553[c] + m02039[c]	497811			Purine metabolism	0	0	1000	0	1	1.17.1.4		PMID:11246119;PMID:12632927;PMID11246119;PMID12632927
RCR10487	Xanthine:oxygen oxidoreductase	m03148[c] + m02630[c] + m02040[c] --> m03120[c] + m02041[c]	497811			Purine metabolism	0	0	1000	0	1	1.17.3.2		PMID:16087479;PMID:1643670;PMID:16756494;PMID:18600557;PMID:8343533;PMID16087479;PMID1643670;PMID16756494;PMID18600557;PMID8343533
RCR10488	ATP:CDP phosphotransferase	m01623[m] + m01285[m] <==> m01424[m] + m01371[m]	191575 or 83782 or 171566 or 58964 or 685679 or 688903 or 85269			Pyrimidine metabolism	1	-1000	1000	0	1	2.7.4.6		PMID:132087;PMID9099850
RCR10489	nucleoside-diphosphate kinase[m]	m01753[m] + m01637[m] <==> m01747[m] + m01642[m]	191575 or 83782 or 171566 or 58964 or 685679 or 688903 or 85269			Pyrimidine metabolism	1	-1000	1000	0	1	2.7.4.6		PMID:3026468;PMID3026468
RCR10490	hydrogen-carbonate:L-glutamine amido-ligase (ADP-forming, carbamate-phosphorylating)	m01975[c] + m02046[c] + 2 m01371[c] + m02039[c] + m02040[c] --> m01420[c] + m01974[c] + m02751[c] + 2 m01285[c]	24240			Pyrimidine metabolism	0	0	1000	0	1	6.3.5.5		PMID:2472341;PMID:29209;PMID:8089153
RCR10491	UDP phosphohydrolase	m03106[r] + m02040[r] --> m03114[r] + m02751[r]	246272 or 64467 or 64519 or 85260 or 314312 or 613267 or 316077 or 361063			Pyrimidine metabolism	0	0	1000	0	1	3.6.1.5;3.6.1.6		PMID:10858452
RCR10492	2'-deoxyuridine 5'-monophosphate phosphohydrolase	m01755[c] + m02040[c] --> m01673[c] + m02751[c]	287368 or 100360582			Pyrimidine metabolism	0	0	1000	0	1	3.1.3.-		PMID10899995
RCR10493	thymidine kinase	m01673[c] + m01688[c] --> m01755[c] + m01680[c]	24834			Pyrimidine metabolism	0	0	1000	0	1	2.7.1.21		PMID:11812127
RCR10494	nucleoside-diphosphatase (dUDP)	m01754[c] + m02040[c] --> m01755[c] + m02751[c]	497778			Nucleotide metabolism	0	0	1000	0	1	3.6.1.23
RCR10495	ATP:CMP phosphotransferase[m]	m01424[m] + m01285[m] <==> m01590[m] + m01371[m]	314004			Nucleotide metabolism	1	-1000	1000	0	1	2.7.4.14		PMID:10462544;PMID:11912132;PMID:132087;PMID:7581800;PMID:8867780;PMID17999954
RCR10496	ATP:adenosine 5'-phosphotransferase[m]	m01280[m] + m01371[m] --> m01334[m] + m01285[m]	25368 or 79127			Nucleotide metabolism	0	0	1000	0	1
RCR10497	ATP:sulfate adenylyltransferase	m02946[c] + m01371[c] --> m01283[c] + m02759[c]	294103 or 295443			Nucleotide metabolism	0	0	1000	0	1	2.7.7.4		PMID:10679223
RCR10498	ATP:adenylylsulfate 3'-phosphotransferase	m01283[c] + m01371[c] --> m02682[c] + m01285[c]	294103 or 295443			Nucleotide metabolism	0	0	1000	0	1	2.7.1.25		PMID:10679223;PMID:11931637
RCR10499	ATP:deoxyuridine 5'-phosphotransferase	m01673[c] + m01371[c] --> m01755[c] + m01285[c]	24834			Nucleotide metabolism	0	0	1000	0	1	2.7.1.21		PMID:1063125;PMID:16630572;PMID:3457791
RCR10500	thymidylate 5'-phosphohydrolase	m01752[l] + m02040[l] --> m02996[l] + m02751[l]	100360582 or 287368 or 298881 or 312373 or 313574 or 360629 or 58813			Nucleotide metabolism	0	0	1000	0	1	3.1.3.-
RCR10501	ATP:dTDP phosphotransferase[m]	m01753[m] + m01285[m] <==> m01747[m] + m01371[m]	171566 or 191575 or 58964 or 685679 or 688903 or 83782 or 85269			Nucleotide metabolism	1	-1000	1000	0	1	2.7.4.6		PMID9099850
RCR10502	ATP:IDP phosphotransferase	m02193[n] + m01285[n] <==> m02161[n] + m01371[n]	191575 or 83782			Nucleotide metabolism	1	-1000	1000	0	1	2.7.4.6
RCR10503	Adenosine:phosphate alpha-D-ribosyltransferase	m01280[c] + m02751[c] <==> m02844[c] + m01279[c]	290029			Nucleotide metabolism	1	-1000	1000	0	1	2.4.2.1		PMID6087295;PMID9305963
RCR10504	Carbon-dioxide:ammonia ligase (ADP-forming,carbamate-phosphorylating)	m02578[m] + m01596[m] + 2 m01371[m] + m02040[m] --> m01420[m] + m02751[m] + 2 m01285[m]	497840			Alanine aspartate and glutamate metabolism	0	0	1000	0	1	6.3.4.16		PMID:15897806;PMID:175068;PMID:2893372;PMID:3886433;PMID:4347313;PMID:7248316
RCR10505	carbamoyl phosphate transport, endoplasmic reticulum	m02578[m] + m02046[m] + 2 m01371[m] + m02039[m] --> m01420[m] + m02751[m] + 2 m01285[m]	497840			Alanine aspartate and glutamate metabolism	0	0	1000	0	1	6.3.4.16
RCR10506	L-Glutamate:ammonia ligase (ADP-forming)	m02578[c] + m01974[c] + m01371[c] --> m01975[c] + m02751[c] + m01285[c]	24957 or 316304			Alanine aspartate and glutamate metabolism	0	0	1000	0	1	6.3.1.2		PMID:11080211;PMID:1356223;PMID:14583610;PMID:16213501;PMID:7595668;PMID:8838581;PMID:9053810
RCR10507	gamma-glutamylcyclotransferase	m01127[c] + m02026[c] <==> m01928[c]	290500 or 362368			Alanine aspartate and glutamate metabolism	1	-1000	1000	0	1	2.3.2.4		PMID:2570694;PMID:6150932
RCR10508	Carbamoyl-phosphate:L-ornithine carbamoyltransferase	m01588[m] + m02751[m] <==> m01420[m] + m02658[m]	25611			Arginine and proline metabolism	1	-1000	1000	0	1	2.1.3.3		PMID:12788037;PMID:893420
RCR10509	L-Arginine amidinohydrolase[c]	m01365[c] + m02040[c] --> m03121[c] + m02658[c]	29221 or 29215			Arginine and proline metabolism	0	0	1000	0	1	3.5.3.1		PMID:12055339;PMID:3583682;PMID:743206;PMID:9144563
RCR10510	S-adenosylmethioninamine:spermidine 3-aminopropyltransferase	m02870[c] + m02923[c] --> m01116[c] + m02926[c] + m02039[c]	84596 or 100912604 or 363469			Arginine and proline metabolism	0	0	1000	0	1	2.5.1.16;2.5.1.22		PMID:2730590;PMID:3109311;PMID7546290
RCR10511	L-arginine carboxy-lyase (agmatine-forming)	m01365[m] --> m01303[m] + m01596[m]	366473			Arginine and proline metabolism	0	0	1000	0	1	4.1.1.19		PMID:10800966;PMID:14738999
RCR10512	4-Aminobutyraldehyde:NAD+ oxidoreductase	m00969[m] + m02554[m] + m02040[m] --> m00970[m] + m02555[m] + m02039[m]	291450 or 29539 or 64040 or 65183 or 298079			Arginine and proline metabolism	0	0	1000	0	1	1.2.1.3		PMID:10467734;PMID:11790142;PMID:4817964;PMID:8155713;PMID:8645224;PMID:8786138;PMID10467734;PMID11790142;PMID4817964;PMID8155713;PMID8645224;PMID8786138
RCR10513	4-hydroxy-2-oxoglutarate glyoxylate-lyase (pyruvate-forming)	m00989[m] --> m02007[m] + m02819[m]	293949			Arginine and proline metabolism	0	0	1000	0	1	4.1.3.16		PMID12660328;PMID14193832;PMID15849464;PMID9783918
RCR10514	diamine N-acetyltransferase	m02504[c] + m01597[c] <==> m02926[c] + m01261[c]	302642 or 360547			Arginine and proline metabolism	1	-1000	1000	0	1	2.3.1.57		PMID:10978316
RCR10515	diamine N-acetyltransferase[c]	m02503[c] + m01597[c] <==> m02923[c] + m01261[c]	302642 or 360547			Arginine and proline metabolism	1	-1000	1000	0	1	2.3.1.57		PMID:10978316
RCR10516	diamine N-acetyltransferase[p]	m02503[p] + m01597[p] <==> m02923[p] + m01261[p]	302642 or 360547			Arginine and proline metabolism	1	-1000	1000	0	1	2.3.1.57		PMID:10978316
RCR10517	N1-acetylspermine:oxygen oxidoreductase (3-acetamidopropanal-forming)	m02504[c] + m02630[c] + m02040[c] --> m01250[c] + m02923[c] + m02041[c]	308652 or 293589 or 501620			Arginine and proline metabolism	0	0	1000	0	1	1.5.3.13;1.5.3.16		PMID:11454677;PMID:9359869
RCR10518	RCR10518[c]	m02502[c] + m01597[c] <==> m02503[c] + m01261[c]				Arginine and proline metabolism	1	-1000	1000	0	1
RCR10519	ATP Creatine kinase (c)	m01620[m] + m01285[m] + 2 m02039[m] <==> m01619[m] + m01371[m]	24264 or 24265 or 29593 or 688698			Arginine and proline metabolism	1	-1000	1000	0	1	2.7.3.2
RCR10520	S-Adenosyl-L-methionine:glycine N-methyltransferase	m02877[c] + m01986[c] --> m02880[c] + m02871[c]	25134			Glycine serine and threonine metabolism	0	0	1000	0	1	2.1.1.20		PMID:9597750
RCR10521	choline dehydrogenase	m01513[c] + m02552[c] --> m01394[c] + m02553[c] + m02039[c]	290551			Glycine serine and threonine metabolism	0	0	1000	0	1	1.1.99.1
RCR10522	p-cumic alcohol:NAD+ oxidoreductase	m01394[c] + m02552[c] + m02040[c] --> m01393[c] + m02553[c] + 2 m02039[c]	291450			Glycine serine and threonine metabolism	0	0	1000	0	1	1.2.1.8		PMID:10505788;PMID:7646513;PMID10505788;PMID7646513
RCR10523	L-Alanine:glyoxylate aminotransferase[p]	m02007[p] + m01307[p] --> m02819[p] + m01986[p]	24792			Glycine serine and threonine metabolism	0	0	1000	0	1	2.6.1.44
RCR10524	Glycolate:oxygen 2-oxidoreductase	m01998[c] + m02630[c] --> m02007[c] + m02041[c]	84029 or 311446			Glycine serine and threonine metabolism	0	0	1000	0	1	1.1.3.15
RCR10525	RCR10525[c]	m02866[c] + 2 m02039[c] + m02040[c] <==> m02867[c] + m01986[c] + m01974[c]	361532 or 306840 or 497009 or 293653 or 303745 or 246233 or 293615 or 299638 or 362914 or 499210 or 309757 or 360462 or 685695 or 367214			Aromatic amino acid metabolism	1	-1000	1000	0	1	3.5.1.-
RCR10526	L-2-aminoadipate:2-oxoglutarate aminotransferase	m00670[c] + m01974[c] <==> m02322[c] + m01306[c]	29416			Lysine metabolism	1	-1000	1000	0	1	2.6.1.39		PMID:8087205
RCR10527	L-2-Aminoadipate-6-semialdehyde:NAD+ 6-oxidoreductase[m]	m00631[m] + m02552[m] + m02040[m] --> m02322[m] + m02553[m] + m02039[m]	291450			Lysine metabolism	0	0	1000	0	1	1.2.1.31		PMID15865210
RCR10528	4-Trimethylammoniobutanoate,2-oxoglutarate:oxygen oxidoreductase (3-hydroxylating)	m01922[c] + m01306[c] + m02630[c] --> m02943[c] + m01596[c] + m02348[c]	64564			Lysine metabolism	0	0	1000	0	1	1.4.11.1		PMID9753662
RCR10529	Phenethylamine:oxygen oxidoreductase (deaminating)	m02718[c] + m02630[c] + m02040[c] --> m02719[c] + m02578[c] + m02041[c]	25750 or 29473 or 65029 or 29253			Aromatic amino acid metabolism	0	0	1000	0	1	1.4.3.4;1.4.3.21
RCR10530	Phenylacetaldehyde:NAD+ oxidoreductase	m02719[m] + m02552[m] + m02040[m] --> m02720[m] + m02553[m] + m02039[m]	25375 or 266603 or 309147 or 688778			Aromatic amino acid metabolism	0	0	1000	0	1	1.2.1.5;1.2.1.39		PMID:15230339;PMID15230339
RCR10531	Aldehyde:NADP+ oxidoreductase	m02720[m] + m02555[m] + m02039[m] <==> m02719[m] + m02554[m] + m02040[m]	25375 or 266603 or 309147 or 688778			Aromatic amino acid metabolism	1	-1000	1000	0	1	1.2.1.5		PMID:17379813;PMID:18621017;PMID17379813;PMID18621017
RCR10532	Dopaquinone isomerase 1	2 m00638[c] + m02630[c] --> 2 m02355[c] + 2 m02040[c]	308800			Aromatic amino acid metabolism	0	0	1000	0	1	1.14.18.1
RCR10533	(S)-Methylmalonate semialdehyde:NAD+ oxidoreductase	m00661[c] + m02552[c] + m02040[c] --> m02479[c] + m02553[c] + m02039[c]	291450 or 29539 or 64040 or 65183 or 298079			Valine leucine and isoleucine metabolism	0	0	1000	0	1	1.2.1.3		PMID:10947204;PMID:10989432;PMID:1527093;PMID:16683190;PMID:8120000;PMID:8155713;PMID:8634152;PMID:9787093
RCR10534	3-Hydroxy-L-kynurenine hydrolase	m00788[c] + m02040[c] --> m00775[c] + m01307[c]	116682			Aromatic amino acid metabolism	0	0	1000	0	1	3.7.1.3
RCR10535	2-Amino-3-carboxymuconate semialdehyde carboxy-lyase	m00629[c] --> m00633[c] + m01596[c]	171385			Aromatic amino acid metabolism	0	0	1000	0	1	4.1.1.45		PMID:12140278
RCR10536	RCR10536[c]	m00633[c] <==> m02752[c] + m02040[c]				Aromatic amino acid metabolism	1	-1000	1000	0	1			PMID:9291104
RCR10537	S-Adenosyl-L-methionine:catechol O-methyltransferase[c]	m02617[c] + m02877[c] --> m02622[c] + m02871[c]	24267 or 308868			Aromatic amino acid metabolism	0	0	1000	0	1	2.1.1.6
RCR10538	L-Normetanephrine:oxygen oxidoreductase (deaminating) (copper-containing)	m02622[c] + m02630[c] + m02040[c] --> m00820[c] + m02578[c] + m02041[c]	25750 or 29253			Aromatic amino acid metabolism	0	0	1000	0	1	1.4.3.4
RCR10539	3,4-dihydroxyphenylethyleneglycol:NAD+ oxidoreductase	m00726[c] + m02553[c] + m02039[c] <==> m00730[c] + m02552[c]	100145871 or 171178 or 362474 or 310903 or 29646 or 24172			Aromatic amino acid metabolism	1	-1000	1000	0	1	1.1.1.1		PMID3466164
RCR10540	3,4-Dihydroxyphenylacetaldehyde:NAD+ oxidoreductase	m00728[c] + m02552[c] + m02040[c] --> m00729[c] + m02553[c] + m02039[c]	25375 or 266603 or 309147 or 688778			Aromatic amino acid metabolism	0	0	1000	0	1	1.2.1.5		PMID11306106;PMID2071588
RCR10541	3-Methoxytyramine:oxygen oxidoreductase (deaminating) (copper-containing)	m00821[c] + m02630[c] + m02040[c] --> m00818[c] + m02578[c] + m02041[c]	25750 or 29253			Aromatic amino acid metabolism	0	0	1000	0	1	1.4.3.4
RCR10542	4-Hydroxyphenylacetaldehyde:NAD+ oxidoreductase	m01002[c] + m02552[c] + m02040[c] --> m01003[c] + m02553[c] + m02039[c]	25375 or 266603 or 309147 or 688778			Aromatic amino acid metabolism	0	0	1000	0	1	1.2.1.5
RCR10543	RCR10543[c]	m01290[c] --> m01292[c] + 4 m02039[c]				Aromatic amino acid metabolism	0	0	1000	0	1
RCR10544	L-Dopachrome delta7-delta2-isomerase	m02355[c] --> m01053[c]	290484			Aromatic amino acid metabolism	0	0	1000	0	1	5.3.3.12
RCR10545	ATP:L-methionine S-adenosyltransferase	m02471[c] + m01371[c] + m02040[c] --> m02877[c] + m02759[c] + m02751[c]	171347 or 683630 or 25331			Cysteine and methionine metabolism	0	0	1000	0	1	2.5.1.6		PMID:7213623
RCR10546	L-cysteine:NAD+ oxidoreductase	m01629[c] + m02553[c] + m02039[c] <==> 2 m01628[c] + m02552[c]				Cysteine and methionine metabolism	1	-1000	1000	0	1	1.8.1.6
RCR10547	S-adenosyl-L-methionine:DNA (cytosine-5-)-methyltransferase	m01721[c] + m02877[c] --> m01722[c] + m02871[c] + m02039[c]	444984 or 291324 or 309680 or 444985 or 84350			Cysteine and methionine metabolism	0	0	1000	0	1	2.1.1.37
RCR10548	phosphoadenylyl-sulfate reductase (thioredoxin)	m02990[c] + m02682[c] --> m02666[c] + m02949[c] + m02681[c]				Cysteine and methionine metabolism	0	0	1000	0	1
RCR10549	L-cysteine/L-glutamine reversible exchanger	m01629[c] + 2 m02026[c] <==> m02027[c] + 2 m01628[c]				Cysteine and methionine metabolism	1	-1000	1000	0	1
RCR10550	5-oxo-L-proline amidohydrolase (ATP-hydrolysing)	m01127[c] + m01371[c] + 2 m02040[c] --> m01974[c] + m02751[c] + m01285[c]	116684			Glutathione metabolism	0	0	1000	0	1	3.5.2.9		PMID:10078874;PMID:9516961
RCR10551	spermidine:oxygen oxidoreductase (spermidine-forming)	m02926[c] + m02630[c] + m02040[c] --> m00760[c] + m02923[c] + m02041[c]	308652 or 501620			beta-Alanine metabolism	0	0	1000	0	1	1.5.3.17
RCR10552	L-histidine:beta-alanine ligase (ADP-forming)	m01383[c] + m02125[c] + m01371[c] --> m01423[c] + m01334[c] + m02759[c]	309150			beta-Alanine metabolism	0	0	1000	0	1	6.3.2.11		PMID:448355;PMID:487087
RCR10553	Nalpha-(beta-alanyl)-L-histidine hydrolase	m01423[c] + m02040[c] --> m01383[c] + m02125[c]	291394 or 307212			beta-Alanine metabolism	0	0	1000	0	1	3.4.13.3;3.4.13.20		PMID:2334521;PMID:4026801
RCR10554	4-aminobutanal:NAD+ 1-oxidoreductase[m]	m00969[m] + m02552[m] + m02040[m] --> m00970[m] + m02553[m] + m02039[m]	291450 or 29539 or 64040 or 65183 or 298079			beta-Alanine metabolism	0	0	1000	0	1	1.2.1.3;1.2.1.19		PMID:2925663;PMID:8155713;PMID:8269919;PMID:8786138;PMID:9417993;PMID2925663;PMID8155713;PMID8269919;PMID8786138;PMID9417993
RCR10555	3-Hydroxypropionyl-CoA hydro-lyase	m01265[m] + m02040[m] <==> m00799[m]	171142 and 140547 and 170670			beta-Alanine metabolism	1	-1000	1000	0	1	4.2.1.17		PMID:10671535;PMID8824301
RCR10556	(S)-Methylmalonate semialdehyde:NAD+ oxidoreductase[m]	m00661[m] + m02552[m] + m02040[m] --> m02479[m] + m02553[m] + m02039[m]	291450 or 29539 or 54349 or 64040 or 65183 or 298079			Valine leucine and isoleucine metabolism	0	0	1000	0	1	1.2.1.3;1.2.3.1		PMID:10947204;PMID:10989432;PMID:1527093;PMID:16683190;PMID:8120000;PMID:8155713;PMID:8634152;PMID:9787093
RCR10557	(S)-Methylmalonyl-CoA hydrolase	m02479[m] + m01597[m] --> m00166[m] + m02040[m]	81708			Valine leucine and isoleucine metabolism	0	0	1000	0	1	3.1.2.17;1.2.1.18		PMID:3071714;PMID:6885824
RCR10558	(S)-Methylmalonate semialdehyde:oxygen oxidoreductase	m00661[c] + m02630[c] + m02040[c] --> m02479[c] + m02041[c]	316421 or 316424 or 493909 or 54349			Valine leucine and isoleucine metabolism	0	0	1000	0	1	1.2.3.1		PMID:11569919;PMID:16143537;PMID20038499
RCR10559	CMP-N-acetylneuraminate,ferrocytochrome-b5:oxygen oxidoreductase (N-acetyl-hydroxylating)	m01593[c] + m02552[c] + m02040[c] --> m01592[c] + m02553[c] + m02630[c] + m02039[c]	361245			Carbohydrate metabolism	0	0	1000	0	1	1.14.18.2		PMID:11211935;PMID:2249689;PMID:8112313;PMID19890979;PMID22692205;PMID11786991
RCR10560	dTDPglucose 4-epimerase	m01750[c] <==> m01751[c]	114860			Carbohydrate metabolism	1	-1000	1000	0	1	5.1.3.2
RCR10561	L-Alanine:tRNA(Ala) ligase (AMP-forming)	m03063[c] + m01307[c] + m01371[c] --> m02335[c] + m01334[c] + m02759[c]	292023 or 301254			Protein metabolism	0	0	1000	0	1	6.1.1.7
RCR10562	L-glutamate:tRNA(Glu) ligase (AMP-forming)	m03069[c] + m01974[c] + m01371[c] --> m02377[c] + m01334[c] + m02759[c]	289352 or 361641 or 685245			Protein metabolism	0	0	1000	0	1	6.1.1.17
RCR10563	L-Methionine:tRNAMet ligase (AMP-forming)	m03075[c] + m02471[c] + m01371[c] --> m02408[c] + m01334[c] + m02759[c]	299851 or 316403 or 100911305			Protein metabolism	0	0	1000	0	1	6.1.1.10
RCR10564	dehydrodolichol phosphate phosphatase (liver)	m01658[c] + m02040[c] --> m01656[c] + m02751[c]				Glycan metabolism	0	0	1000	0	1			PMID11425794
RCR10565	GDPmannose:dolichyl-phosphate O-beta-D-mannosyltransferase	m01951[c] + m01733[c] --> m01734[c] + m01948[c]	296394 and 29640 and 502017			Glycan metabolism	0	0	1000	0	1	2.4.1.83
RCR10566	mannosyl-oligosaccharide glucosidase, endoplasmic reticulum	m00140[r] + m02040[r] --> m00139[r] + m01965[r]	78947			Glycan metabolism	0	0	1000	0	1	3.2.1.106
RCR10567	mannosyl-oligosaccharide glucosidase, endoplasmic reticulum[r]	m00139[r] + m02040[r] --> m00138[r] + m01965[r]	293721			Glycan metabolism	0	0	1000	0	1	3.2.1.84
RCR10568	mannosidase II, endoplasmic reticulum (g1m7masnC-producing)	m00138[r] + m02040[r] --> m01971[r] + m02453[r]				Glycan metabolism	0	0	1000	0	1			PMID11007802;PMID11935292
RCR10569	MG3er	m00138[r] + m02040[r] --> m00153[r] + m01965[r]				Glycan metabolism	0	0	1000	0	1
RCR10570	Endomannosidase (m6masnC-producing), Golgi apparatus	m01971[g] + 2 m02040[g] --> m00149[g] + m02453[g] + m01965[g]				Glycan metabolism	0	0	1000	0	1
RCR10571	Endomannosidase (m6masnB2-producing), Golgi apparatus	m01970[g] + 2 m02040[g] --> m00148[g] + m02453[g] + m01965[g]				Glycan metabolism	0	0	1000	0	1
RCR10572	Endomannosidase (m5masnB1-producing), Golgi apparatus	m01969[g] + 2 m02040[g] --> m00143[g] + m02453[g] + m01965[g]				Glycan metabolism	0	0	1000	0	1
RCR10573	mannosyl-oligosaccharide 1,2-alpha-mannosidase, Golgi apparatus	m00153[g] + m02040[g] --> m00150[g] + m02453[g]	499751 or 294410 or 362625 or 295319			Glycan metabolism	0	0	1000	0	1	3.2.1.113		PMID10915796;PMID9592125
RCR10574	mannosyl-oligosaccharide 1,2-alpha-mannosidase, Golgi apparatus[g]	m00151[g] + m02040[g] --> m00148[g] + m02453[g]	499751 or 294410 or 362625 or 295319			Glycan metabolism	0	0	1000	0	1	3.2.1.113		PMID10915796;PMID9592125
RCR10575	mannosyl-oligosaccharide 1,2-alpha-mannosidase	m00150[g] + m02040[g] --> m00149[g] + m02453[g]	499751 or 294410 or 362625 or 295319			Glycan metabolism	0	0	1000	0	1	3.2.1.113		PMID10915796;PMID9592125
RCR10576	mannosyl-oligosaccharide 1,2-alpha-mannosidase[g]	m00148[g] + m02040[g] --> m00143[g] + m02453[g]	499751 or 294410 or 362625 or 295319			Glycan metabolism	0	0	1000	0	1	3.2.1.113		PMID10915796;PMID9592125
RCR10577	mannosidase 1A	m00149[g] + m02040[g] --> m00145[g] + m02453[g]	499751 or 294410 or 362625 or 295319			Glycan metabolism	0	0	1000	0	1	3.2.1.113		PMID10915796;PMID9592125
RCR10578	mannosidase 1B	m00145[g] + m02040[g] --> m00142[g] + m02453[g]	499751 or 294410 or 362625 or 295319			Glycan metabolism	0	0	1000	0	1	3.2.1.113		PMID10915796;PMID9592125
RCR10579	1,2-alpha-mannosidase	m00143[g] + m02040[g] --> m00142[g] + m02453[g]	499751 or 294410 or 362625 or 295319			Glycan metabolism	0	0	1000	0	1	3.2.1.113		PMID10915796;PMID9592125
RCR10580	glycosylasparaginase, lysosomal	m01652[l] + m02040[l] --> m01651[l] + m00198[l]	290923			Glycan metabolism	0	0	1000	0	1	3.5.1.26
RCR10581	alpha-fucosidase, lysosomal	m02672[l] + m02040[l] --> m01652[l] + m01159[l]	24375 or 292485			Glycan metabolism	0	0	1000	0	1	3.2.1.51
RCR10582	Dolichyl-diphosphate phosphohydrolase	m01732[r] + m02040[r] --> m01733[r] + m02751[r]	296624			Glycan metabolism	0	0	1000	0	1
RCR10583	human albumin degradation	m01308[c] + 304 m01371[c] + 304 m02040[c] --> 36 m01370[c] + 16 m02125[c] + 27 m01365[c] + 60 m02426[c] + 2 m03089[c] + 9 m02184[c] + 43 m03135[c] + 29 m02993[c] + 17 m01369[c] + 64 m02360[c] + 35 m02724[c] + 7 m02471[c] + 19 m03101[c] + 24 m02770[c] + 35 m01628[c] + 20 m01975[c] + 28 m02896[c] + 63 m01307[c] + 13 m01986[c] + 62 m01974[c] + 304 m02751[c] + 304 m01285[c]	0			Biomass	0	0	0	0	1
RCR10584	RCR10584[c]	m01343[c] + 211 m01371[c] + 211 m02040[c] --> 25 m01370[c] + 9 m02125[c] + 16 m01365[c] + 26 m02426[c] + 3 m03089[c] + 20 m02184[c] + 24 m03135[c] + 29 m02993[c] + 19 m01369[c] + 59 m02360[c] + 25 m02724[c] + 14 m02471[c] + 9 m03101[c] + 16 m02770[c] + 3 m01628[c] + 17 m01975[c] + 30 m02896[c] + 34 m01307[c] + 16 m01986[c] + 29 m01974[c] + 211 m02751[c] + 211 m01285[c]				Biomass	0	0	1000	0	1
RCR10585	RCR10585[c]	m01345[c] + 209 m01371[c] + 209 m02040[c] --> 24 m01370[c] + 13 m02125[c] + 7 m01365[c] + 34 m02426[c] + 3 m03089[c] + 20 m02184[c] + 27 m03135[c] + 30 m02993[c] + 19 m01369[c] + 51 m02360[c] + 27 m02724[c] + 10 m02471[c] + 6 m03101[c] + 19 m02770[c] + 3 m01628[c] + 18 m01975[c] + 25 m02896[c] + 26 m01307[c] + 24 m01986[c] + 32 m01974[c] + 209 m02751[c] + 209 m01285[c]				Biomass	0	0	1000	0	1
RCR10586	RCR10586[c]	m01351[c] + 2280 m01371[c] + 2280 m02040[c] --> 233 m01370[c] + 115 m02125[c] + 150 m01365[c] + 357 m02426[c] + 37 m03089[c] + 285 m02184[c] + 252 m03135[c] + 300 m02993[c] + 247 m01369[c] + 533 m02360[c] + 224 m02724[c] + 79 m02471[c] + 151 m03101[c] + 171 m02770[c] + 25 m01628[c] + 230 m01975[c] + 392 m02896[c] + 275 m01307[c] + 207 m01986[c] + 298 m01974[c] + 2280 m02751[c] + 2280 m01285[c]				Biomass	0	0	1000	0	1
RCR10587	RCR10587[c]	m01349[c] + 62 m01371[c] + 62 m02040[c] --> 8 m01370[c] + m02125[c] + 9 m01365[c] + 4 m02426[c] + 4 m02184[c] + 11 m03135[c] + 6 m02993[c] + m01369[c] + 20 m02360[c] + 3 m02724[c] + 5 m02471[c] + 4 m03101[c] + 9 m02770[c] + 2 m01628[c] + 7 m01975[c] + 8 m02896[c] + 11 m01307[c] + 6 m01986[c] + 5 m01974[c] + 62 m02751[c] + 62 m01285[c]				Biomass	0	0	1000	0	1
RCR10588	RCR10588[c]	m01353[c] + 41 m01371[c] + 41 m02040[c] --> 4 m01370[c] + 4 m01365[c] + 9 m02426[c] + m03089[c] + 4 m02184[c] + 7 m03135[c] + 3 m02993[c] + m01369[c] + 12 m02360[c] + 4 m02724[c] + 2 m02471[c] + 4 m02770[c] + 3 m01975[c] + 9 m02896[c] + 5 m01307[c] + 3 m01986[c] + 8 m01974[c] + 41 m02751[c] + 41 m01285[c]				Biomass	0	0	1000	0	1
RCR10589	RCR10589[c]	m01354[c] + 50 m01371[c] + 50 m02040[c] --> 4 m01370[c] + 2 m01365[c] + 6 m02426[c] + m02184[c] + m03089[c] + 7 m03135[c] + 10 m02993[c] + m01369[c] + 15 m02360[c] + 4 m02724[c] + 3 m02471[c] + 5 m02770[c] + 5 m03101[c] + 8 m01975[c] + 9 m02896[c] + 7 m01307[c] + 5 m01986[c] + 8 m01974[c] + 50 m02751[c] + 50 m01285[c]				Biomass	0	0	1000	0	1
RCR10590	RCR10590[c]	m01355[c] + 49 m01371[c] + 49 m02040[c] --> 7 m01370[c] + m02125[c] + 4 m01365[c] + 6 m02426[c] + 3 m03089[c] + 9 m03135[c] + 5 m02993[c] + 11 m02360[c] + 4 m02724[c] + 3 m02471[c] + 2 m03101[c] + 3 m02770[c] + 6 m01975[c] + 12 m02896[c] + 15 m01307[c] + 3 m01986[c] + 5 m01974[c] + 49 m02751[c] + 49 m01285[c]				Biomass	0	0	1000	0	1
RCR10591	RCR10591[c]	m00186[c] + 349 m01371[c] + 349 m02040[c] --> 45 m01370[c] + 19 m02125[c] + 27 m01365[c] + 58 m02426[c] + 8 m03089[c] + 15 m02184[c] + 48 m03135[c] + 30 m02993[c] + 34 m01369[c] + 65 m02360[c] + 28 m02724[c] + 10 m02471[c] + 26 m03101[c] + 32 m02770[c] + 40 m01628[c] + 17 m01975[c] + 41 m02896[c] + 61 m01307[c] + 52 m01986[c] + 42 m01974[c] + 349 m02751[c] + 349 m01285[c]				Biomass	0	0	1000	0	1
RCR10592	RCR10592[c]	m01359[c] + 158 m01371[c] + 158 m02040[c] --> 11 m01370[c] + 2 m02125[c] + 34 m01365[c] + 13 m02426[c] + 2 m02184[c] + 8 m03089[c] + 24 m03135[c] + 12 m02993[c] + m01369[c] + 41 m02360[c] + 4 m02724[c] + 8 m02471[c] + 4 m03101[c] + 8 m02770[c] + 2 m01628[c] + 32 m01975[c] + 14 m02896[c] + 39 m01307[c] + 18 m01986[c] + 40 m01974[c] + 158 m02751[c] + 158 m01285[c]				Biomass	0	0	1000	0	1
RCR10593	RCR10593[c]	m01350[c] + 133 m01371[c] + 133 m02040[c] --> 16 m01370[c] + 6 m02125[c] + 17 m01365[c] + 22 m02426[c] + 5 m03089[c] + 15 m03135[c] + 12 m02993[c] + 5 m01369[c] + 41 m02360[c] + 8 m02724[c] + 4 m02471[c] + 7 m03101[c] + 10 m02770[c] + 19 m01975[c] + 16 m02896[c] + 23 m01307[c] + 11 m01986[c] + 30 m01974[c] + 133 m02751[c] + 133 m01285[c]				Biomass	0	0	1000	0	1
RCR10594	very-long-chain (3R)-3-hydroxyacyl-CoA dehydratase	m01996[c] + 175 m01371[c] + 175 m02040[c] --> 26 m01370[c] + 9 m02125[c] + 12 m01365[c] + 18 m02426[c] + 7 m03089[c] + 12 m02184[c] + 28 m03135[c] + 25 m02993[c] + 12 m01369[c] + 39 m02360[c] + 20 m02724[c] + 8 m02471[c] + 13 m03101[c] + 15 m02770[c] + 6 m01628[c] + 14 m01975[c] + 31 m02896[c] + 22 m01307[c] + 18 m01986[c] + 15 m01974[c] + 175 m02751[c] + 175 m01285[c]	288058 or 680115			Biomass	0	0	1000	0	1	4.2.1.134		PMID:10395894;PMID:10721716;PMID:15489334;PMID:8602861;PMID:8661012
RCR10595	RCR10595[c]	m02990[c] + 52 m01371[c] + 52 m02040[c] --> 7 m01370[c] + m02125[c] + 12 m02426[c] + m03089[c] + 4 m02184[c] + 11 m03135[c] + 4 m02993[c] + 3 m01369[c] + 6 m02360[c] + 9 m02724[c] + 3 m02471[c] + m03101[c] + 3 m02770[c] + 5 m01628[c] + 5 m01975[c] + 7 m02896[c] + 8 m01307[c] + 5 m01986[c] + 10 m01974[c] + 52 m02751[c] + 52 m01285[c]				Biomass	0	0	1000	0	1
RCR10596	RCR10596[c]	m02487[c] + 83 m01371[c] + 83 m02040[c] --> 12 m01370[c] + 3 m02125[c] + 9 m01365[c] + 11 m02426[c] + 2 m03089[c] + 9 m02184[c] + 17 m03135[c] + 12 m02993[c] + 4 m01369[c] + 15 m02360[c] + 6 m02724[c] + 4 m02471[c] + 2 m03101[c] + 12 m02770[c] + 3 m01628[c] + 10 m01975[c] + 8 m02896[c] + 11 m01307[c] + 10 m01986[c] + 6 m01974[c] + 83 m02751[c] + 83 m01285[c]				Biomass	0	0	1000	0	1
RCR10597	Adenosine 3',5'-bisphosphate 3'-phosphohydrolase	m02681[c] + m02040[c] --> m01334[c] + m02751[c]	64473 or 312952 or 100910881			Cysteine and methionine metabolism	0	0	1000	0	1	3.1.3.7		PMID:10224133;PMID10224133
RCR10598	3'-Phospho-5'-adenylyl sulfate 3'-phosphohydrolase	m02682[c] + m02040[c] --> m01283[c] + m02751[c]	64473 or 312952 or 100910881			Cysteine and methionine metabolism	0	0	1000	0	1	3.1.3.7		PMID:10224133;PMID10224133
RCR10599	(3S)-citramalyl-CoA hydro-lyase (itaconyl-CoA-forming)	m00084[m] <==> m02192[m] + m02040[m]				Central carbon metabolism	1	-1000	1000	0	1	4.2.1.56
RCR10600	(3S)-citramalyl-CoA pyruvate-lyase (acetyl-CoA-forming)	m00084[m] --> m02819[m] + m01261[m]				Central carbon metabolism	0	0	1000	0	1	4.1.3.25
RCR10601	oxalosuccinate carboxy-lyase (2-oxoglutarate-forming)	m02662[c] --> m01306[c] + m01596[c]	24479 or 361596			Central carbon metabolism	0	0	1000	0	1	1.1.1.42		PMID:16489927;PMID:9866202
RCR10602	oxalosuccinate carboxy-lyase (2-oxoglutarate-forming)[p]	m02662[p] --> m01306[p] + m01596[p]	24479 or 361596			Central carbon metabolism	0	0	1000	0	1	1.1.1.42		PMID:16489927;PMID:9866202
RCR10603	acetyl-CoA:oxaloacetate C-acetyltransferase [(pro-S)-carboxymethyl-forming, ADP-phosphorylating]	m01587[c] + m01371[c] + m01597[c] --> m02633[c] + m01261[c] + m02751[c] + m01285[c]	24159			Central carbon metabolism	0	0	1000	0	1	2.3.3.8		PMID:1371749;PMID:7417478;PMID2295639
RCR10604	Isocitrate:NADP+ oxidoreductase	m02662[p] + m02555[p] + m02039[p] <==> m02183[p] + m02554[p]	24479 or 361596			Central carbon metabolism	1	-1000	1000	0	1	1.1.1.42		PMID:10521434;PMID:16489927;PMID:9866202
RCR10605	Glyoxylate:oxygen oxidoreductase	m02007[p] + m02630[p] + m02040[p] --> m02661[p] + m02041[p]	84029 or 311446			Central carbon metabolism	0	0	1000	0	1	1.1.3.15
RCR10606	diphosphate phosphohydrolase[c]	m02759[c] + m02040[c] --> 2 m02751[c]	310664 or 361663 or 294504 or 310856			Electron transport chain	0	0	1000	0	1	3.6.1.1		PMID:10542310;PMID:16300924
RCR10607	hydrogen-peroxide:hydrogen-peroxide oxidoreductase[m]	2 m02041[m] --> m02630[m] + 2 m02040[m]	24248			Electron transport chain	0	0	0	0	1	1.11.1.6	problematic	PMID:12054464;PMID:1657986;PMID1657986;PMID3755525
RCR10608	superoxide:superoxide oxidoreductase	2 m02631[m] + 2 m02039[m] --> m02041[m] + m02630[m]	24787			Electron transport chain	0	0	1000	0	1	1.15.1.1		PMID12649272;PMID9376114
RCR10609	superoxide:superoxide oxidoreductase[p]	2 m02631[p] + 2 m02039[p] --> m02041[p] + m02630[p]	24786			Electron transport chain	0	0	1000	0	1	1.15.1.1		PMID1332049;PMID3889846
RCR10610	butyrate-CoA ligase	m02694[c] + m01334[c] + m02759[c] <==> m03134[c] + m01371[c] + m01597[c]	24763 or 361637 or 353317 or 246263 or 361638			Fatty acid metabolism	1	-1000	1000	0	1	6.2.1.2
RCR10611	butyrate-CoA ligase[c]	m02122[c] + m01334[c] + m02759[c] <==> m02120[c] + m01371[c] + m01597[c]	24763 or 361637 or 353317 or 246263 or 361638			Fatty acid metabolism	1	-1000	1000	0	1	6.2.1.2
RCR10612	butyrate---CoA ligase	m02107[c] + m01334[c] + m02759[c] <==> m02108[c] + m01371[c] + m01597[c]	24763 or 361637 or 353317 or 246263 or 361638			Fatty acid metabolism	1	-1000	1000	0	1	6.2.1.2
RCR10613	butyrate---CoA ligase[c]	m02644[c] + m01334[c] + m02759[c] <==> m02642[c] + m01371[c] + m01597[c]	24763 or 361637 or 353317 or 246263 or 361638			Fatty acid metabolism	1	-1000	1000	0	1	6.2.1.2
RCR10614	butyryl-CoA synthetase	m02616[c] + m01334[c] + m02759[c] <==> m02614[c] + m01371[c] + m01597[c]	24763 or 361637 or 353317 or 246263 or 361638			Fatty acid metabolism	1	-1000	1000	0	1	6.2.1.2
RCR10615	fatty acid thiokinase (medium chain)	m01650[c] + m01334[c] + m02759[c] <==> m01648[c] + m01371[c] + m01597[c]	24763 or 361637 or 353317 or 246263 or 361638			Fatty acid metabolism	1	-1000	1000	0	1	6.2.1.2
RCR10616	fatty acid elongase	m03116[c] + m01334[c] + m02759[c] <==> m03117[c] + m01371[c] + m01597[c]	24763 or 361637 or 353317 or 246263 or 361638			Fatty acid metabolism	1	-1000	1000	0	1	6.2.1.2
RCR10617	Acetyl-CoA:carbon-dioxide ligase (ADP-forming)	m01261[c] + m02046[c] + m01371[c] + m02039[c] --> m02444[c] + m02751[c] + m01285[c]	60581 or 116719			Fatty acid metabolism	0	0	1000	0	1	6.4.1.2		PMID:7732023;PMID:16854592;PMID:18455495;PMID:10677481;PMID:16721829;PMID:17126822;PMID:235695;PMID:24055;PMID:6116153;PMID:6116159;PMID:6116163;PMID:6138355;PMID:9099716
RCR10618	RCR10618[c]	m00337[c] + m01824[c] <==> m00363[c] + m01826[c] + m02039[c]				Omega-6 fatty acid metabolism	1	-1000	1000	0	1
RCR10619	dihydrolipoyl dehydrogenase	m02394[c] + m02553[c] + 2 m02039[c] <==> m01701[c] + m02552[c]	298942			Fatty acid metabolism	1	-1000	1000	0	1	1.8.1.4
RCR10620	RCR10620[c]	m01041[c] <==> m02363[c] + m02040[c]				Omega-3 fatty acid metabolism	1	-1000	1000	0	1			PMID:8847485
RCR10621	acyl-CoA oxidase	m01364[p] + m02630[p] --> m00682[p] + m02041[p]	50681 or 83522			Omega-6 fatty acid metabolism	0	0	1000	0	1	1.3.3.6		PMID:10407780;PMID:7775433
RCR10622	aryl-4-monooxygenase	m01362[c] + m01803[c] + m02630[c] --> m01054[c] + m01802[c] + m02040[c]	24296 or 24297 or 25086 or 25426 or 310848 or 246767 or 24307 or 54246 or 308445 or 25147 or 65210 or 24299 or 56266 or 503122 or 293989 or 24894 or 29277 or 29298 or 361523 or 171522 or 24303 or 286953 or 100361492 or 266682 or 170509 or 313373			Arachidonic acid metabolism	0	0	1000	0	1	1.14.14.1		PMID:8651708
RCR10623	aryl hydrocarbon hydroxylase	m01362[c] + m01803[c] + m02630[c] --> m01209[c] + m01802[c] + m02040[c]	24296 or 24297 or 25086 or 25426 or 310848 or 246767 or 24307 or 54246 or 308445 or 25147 or 65210 or 24299 or 56266 or 503122 or 293989 or 24894 or 29277 or 29298 or 361523 or 171522 or 24303 or 286953 or 100361492 or 266682 or 170509 or 313373			Arachidonic acid metabolism	0	0	1000	0	1	1.14.14.1		PMID:8651708
RCR10624	Glutathione: 15-HPETE oxidoreductase	m00377[c] + m02027[c] + m02040[c] <==> m00380[c] + 2 m02026[c]	24404 or 94167 or 259233 or 29328 or 298376 or 294744 or 113919 or 64317 or 29326			Arachidonic acid metabolism	1	-1000	1000	0	1	1.11.1.9
RCR10625	12-HPETE hydroxymutase	m00309[c] <==> m02096[c]	24404 or 94167 or 259233 or 29328 or 298376 or 294744 or 113919 or 64317 or 29326			Arachidonic acid metabolism	1	-1000	1000	0	1	1.11.1.9		PMID:9837935;PMID:3942774;PMID:2377602;PMID:10224163
RCR10626	fatty acid amide hydrolase	m01983[c] + m01362[c] + 4 m02039[c] --> m02610[c] + 2 m02040[c]	29347 or 100911581			Arachidonic acid metabolism	0	0	1000	0	1	3.5.1.99
RCR10627	palmitoyl[protein] hydrolase	m01364[p] + m02040[p] --> m01362[p] + m01597[p]	26759 or 29411 or 29725 or 54398 or 192272 or 406166 or 681337 or 314304 or 50559 or 299193			Arachidonic acid metabolism	0	0	1000	0	1	3.1.2.2;3.1.2.22		PMID:10092594;PMID:6151837
RCR10628	carbonyl reductase (NADPH)[m]	m02364[m] + m02552[m] --> m00326[m] + m02553[m] + m02039[m]	266686 or 29224 or 304078 or 100360507			Eicosanoid metabolism	0	0	1000	0	1	1.1.1.184		PMID:9862787;PMID:11368003;PMID:9799565
RCR10629	prostaglandin 9-ketoreductase	m02364[m] + m02554[m] --> m00326[m] + m02555[m] + m02039[m]	266686 or 29224 or 304078 or 100360507			Eicosanoid metabolism	0	0	1000	0	1	1.1.1.184		PMID:7929234;PMID:1326548
RCR10630	RCR10630[r]	m00588[r] <==> m00600[r] + m02040[r]				Eicosanoid metabolism	1	-1000	1000	0	1			PMID:9799565;PMID:9862787;PMID:11368003
RCR10631	RCR10631[m]	m01124[m] + m02555[m] + m02039[m] <==> m01152[m] + m02554[m]	24296 or 24297 or 25086 or 25426 or 310848 or 246767 or 24307 or 54246 or 308445 or 25147 or 65210 or 24299 or 56266 or 503122 or 24894 or 29277 or 29298 or 361523 or 171522 or 24303 or 286953 or 100361492 or 266682 or 170509 or 313373			Eicosanoid metabolism	1	-1000	1000	0	1
RCR10632	RCR10632[p]	m01124[p] + m02555[p] + m02039[p] <==> m01152[p] + m02554[p]	24296 or 24297 or 25086 or 25426 or 310848 or 246767 or 24307 or 54246 or 308445 or 25147 or 65210 or 24299 or 56266 or 503122 or 24894 or 29277 or 29298 or 361523 or 171522 or 24303 or 286953 or 100361492 or 266682 or 170509 or 313373			Eicosanoid metabolism	1	-1000	1000	0	1
RCR10633	unspecific monooxygenase[m]	m01118[m] + m02555[m] + m02039[m] <==> m01151[m] + m02554[m]	24296 or 24297 or 25086 or 25426 or 310848 or 246767 or 24307 or 54246 or 308445 or 25147 or 65210 or 24299 or 56266 or 503122 or 293989 or 24894 or 29277 or 29298 or 361523 or 171522 or 24303 or 286953 or 100361492 or 266682 or 170509 or 313373			Eicosanoid metabolism	1	-1000	1000	0	1	1.14.14.1		PMID:9694844
RCR10634	unspecific monooxygenase[p]	m01118[p] + m02555[p] + m02039[p] <==> m01151[p] + m02554[p]	24296 or 24297 or 25086 or 25426 or 310848 or 246767 or 24307 or 54246 or 308445 or 25147 or 65210 or 24299 or 56266 or 503122 or 293989 or 24894 or 29277 or 29298 or 361523 or 171522 or 24303 or 286953 or 100361492 or 266682 or 170509 or 313373			Eicosanoid metabolism	1	-1000	1000	0	1	1.14.14.1		PMID:9694844
RCR10635	RCR10635[c]	m00326[c] + m02553[c] + m02039[c] --> m00253[c] + m02552[c]	192227 or 84013 or 364134			Eicosanoid metabolism	0	0	1000	0	1	1.3.1.-		PMID:9862787;PMID:8244977
RCR10636	prostaglandin reductase	m00326[m] + m02553[m] + m02039[m] --> m00253[m] + m02552[m]	192227 or 84013 or 364134			Eicosanoid metabolism	0	0	1000	0	1	1.3.1.-		PMID:9862787;PMID:8244977
RCR10637	RCR10637[p]	m00326[p] + m02553[p] + m02039[p] --> m00253[p] + m02552[p]	192227 or 84013 or 364134			Eicosanoid metabolism	0	0	1000	0	1	1.3.1.-		PMID:9862787;PMID:8244977
RCR10638	RCR10638[c]	m00256[c] <==> m00583[c] + m02040[c]				Eicosanoid metabolism	1	-1000	1000	0	1
RCR10639	RCR10639[c]	m02774[c] + m02040[c] --> m02772[c] + m01597[c]	26759 or 29725 or 192272 or 302640 or 681337 or 314304 or 50559 or 299193			Fatty acid metabolism	0	0	1000	0	1	3.1.2.2		PMID:11013297
RCR10640	Formyl-CoA hydrolase	m01836[p] + m02040[p] --> m01833[p] + m01597[p]				Fatty acid metabolism	0	0	1000	0	1			PMID:9166898
RCR10641	carnitine O-palmitoyltransferase	m00127[c] + m02348[c] <==> m00126[c] + m01597[c]	25757 or 308579 or 25756			Fatty acid metabolism	1	-1000	1000	0	1	2.3.1.21
RCR10642	carnitine O-palmitoyltransferase[c]	m00106[c] + m02348[c] <==> m00105[c] + m01597[c]	25757 or 308579 or 25756			Fatty acid metabolism	1	-1000	1000	0	1	2.3.1.21
RCR10643	CPT	m00123[c] + m02348[c] <==> m00122[c] + m01597[c]	25757 or 308579 or 25756			Fatty acid metabolism	1	-1000	1000	0	1	2.3.1.21
RCR10644	CPTo	m00101[c] + m02348[c] <==> m00100[c] + m01597[c]	25757 or 308579 or 25756			Fatty acid metabolism	1	-1000	1000	0	1	2.3.1.21
RCR10645	outer malonyl-CoA inhibitable carnitine palmitoyltransferase	m00108[c] + m02348[c] <==> m00107[c] + m01597[c]	25757 or 308579 or 25756			Fatty acid metabolism	1	-1000	1000	0	1	2.3.1.21
RCR10646	CPTi	m00125[c] + m02348[c] <==> m00124[c] + m01597[c]	25757 or 308579 or 25756			Fatty acid metabolism	1	-1000	1000	0	1	2.3.1.21
RCR10647	CPT I (outer membrane carnitine palmitoyl transferase)	m00103[c] + m02348[c] <==> m00102[c] + m01597[c]	25757 or 308579 or 25756			Fatty acid metabolism	1	-1000	1000	0	1	2.3.1.21
RCR10648	carnitine palmitoyltransferase I	m00121[c] + m02348[c] <==> m00120[c] + m01597[c]	25757 or 308579 or 25756			Fatty acid metabolism	1	-1000	1000	0	1	2.3.1.21
RCR10649	carnitine palmitoyltransferase II	m00012[c] + m02348[c] <==> m00011[c] + m01597[c]	25757 or 308579 or 25756			Fatty acid metabolism	1	-1000	1000	0	1	2.3.1.21
RCR10650	CPT-A	m00343[c] + m02348[c] <==> m00342[c] + m01597[c]	25757 or 308579 or 25756			Fatty acid metabolism	1	-1000	1000	0	1	2.3.1.21
RCR10651	CPT-B	m00262[c] + m02348[c] <==> m00261[c] + m01597[c]	25757 or 308579 or 25756			Fatty acid metabolism	1	-1000	1000	0	1	2.3.1.21
RCR10652	Palmitoyl-CoA:L-carnitine O-palmitoyltransferase	m01363[c] + m01597[c] <==> m01364[c] + m02348[c]	25757 or 308579 or 25756			Fatty acid metabolism	1	-1000	1000	0	1	2.3.1.21		PMID:1735445;PMID:1988962;PMID:2355017;PMID:6361812;PMID:7892212;PMID1988962
RCR10653	acylcarnitine transferase	m00093[c] + m02348[c] <==> m00092[c] + m01597[c]	25757 or 308579 or 25756			Fatty acid metabolism	1	-1000	1000	0	1	2.3.1.21
RCR10654	carnitine palmitoyltransferase	m00023[c] + m02348[c] <==> m00022[c] + m01597[c]	25757 or 308579 or 25756			Fatty acid metabolism	1	-1000	1000	0	1	2.3.1.21
RCR10655	carnitine palmitoyltransferase-A	m00264[c] + m02348[c] <==> m00263[c] + m01597[c]	25757 or 308579 or 25756			Fatty acid metabolism	1	-1000	1000	0	1	2.3.1.21
RCR10656	carnitine O-acetyltransferase	m02635[m] + m01597[m] <==> m01412[m] + m02348[m]	25413 or 311849			Fatty acid metabolism	1	-1000	1000	0	1	2.3.1.7		PMID:12133002;PMID:4475632;PMID:5810070;UNIPROT:Q15125
RCR10657	carnitine O-acetyltransferase[r]	m01729[r] + m01597[r] <==> m02345[r] + m02348[r]	311849			Fatty acid metabolism	1	-1000	1000	0	1	2.3.1.7
RCR10658	acetyl-CoA-carnitine O-acetyltransferase	m03049[r] + m01597[r] <==> m03050[r] + m02348[r]	311849			Fatty acid metabolism	1	-1000	1000	0	1	2.3.1.7
RCR10659	acetylcarnitine transferase	m00129[r] + m02348[r] <==> m02974[r] + m01597[r]	311849			Fatty acid metabolism	1	-1000	1000	0	1	2.3.1.7
RCR10660	carnitine acetyl coenzyme A transferase	m00118[r] + m02348[r] <==> m02975[r] + m01597[r]	311849			Fatty acid metabolism	1	-1000	1000	0	1	2.3.1.7
RCR10661	carnitine acetylase	m02688[r] + m01597[r] <==> m02689[r] + m02348[r]	311849			Fatty acid metabolism	1	-1000	1000	0	1	2.3.1.7
RCR10662	Palmitoyl-CoA:L-carnitine O-palmitoyltransferase[r]	m02411[r] + m01597[r] <==> m02678[r] + m02348[r]	311849			Fatty acid metabolism	1	-1000	1000	0	1	2.3.1.7		PMID:1735445;PMID:1988962;PMID:2355017;PMID:6361812;PMID:7892212PMID:7711730;PMID1735445;PMID1988962;PMID2355017;PMID6361812;PMID7892212
RCR10663	carnitine acetyltransferase	m01191[r] + m02348[r] <==> m02117[r] + m01597[r]	311849			Fatty acid metabolism	1	-1000	1000	0	1	2.3.1.7
RCR10664	carnitine O-palmitoyltransferase[r]	m02676[r] + m01597[r] <==> m02677[r] + m02348[r]	311849			Fatty acid metabolism	1	-1000	1000	0	1	2.3.1.7		PMID:1735445;PMID:1988962;PMID:2355017;PMID:6361812;PMID:7892212
RCR10665	carnitine-acetyl-CoA transferase	m02100[r] + m01597[r] <==> m02101[r] + m02348[r]	311849			Fatty acid metabolism	1	-1000	1000	0	1	2.3.1.7
RCR10666	CATC	m00004[r] + m02348[r] <==> m02102[r] + m01597[r]	311849			Fatty acid metabolism	1	-1000	1000	0	1	2.3.1.7
RCR10667	acetyl-CoA-carnitine O-acetyltransferase[r]	m01237[r] + m02348[r] <==> m02103[r] + m01597[r]	311849			Fatty acid metabolism	1	-1000	1000	0	1	2.3.1.7
RCR10668	acetylcarnitine transferase[r]	m02940[r] + m01597[r] <==> m02941[r] + m02348[r]	311849			Fatty acid metabolism	1	-1000	1000	0	1	2.3.1.7
RCR10669	carnitine acetyl coenzyme A transferase[r]	m00020[r] + m02348[r] <==> m02639[r] + m01597[r]	311849			Fatty acid metabolism	1	-1000	1000	0	1	2.3.1.7
RCR10670	carnitine acetylase[r]	m02410[r] + m01597[r] <==> m02647[r] + m02348[r]	311849			Fatty acid metabolism	1	-1000	1000	0	1	2.3.1.7		PMID:1735445;PMID:1988962;PMID:2355017;PMID:6361812;PMID:7892212
RCR10671	carnitine acetyltransferase[r]	m02611[r] + m01597[r] <==> m02612[r] + m02348[r]	311849			Fatty acid metabolism	1	-1000	1000	0	1	2.3.1.7
RCR10672	carnitine-acetyl-CoA transferase[r]	m01772[r] + m01597[r] <==> m01773[r] + m02348[r]	311849			Fatty acid metabolism	1	-1000	1000	0	1	2.3.1.7
RCR10673	CATC[r]	m00007[r] + m02348[r] <==> m01777[r] + m01597[r]	311849			Fatty acid metabolism	1	-1000	1000	0	1	2.3.1.7
RCR10674	RCR10674[r]	m01236[r] + m02348[r] <==> m01775[r] + m01597[r]	311849			Fatty acid metabolism	1	-1000	1000	0	1	2.3.1.7
RCR10675	RCR10675[r]	m00018[r] + m02348[r] <==> m01776[r] + m01597[r]	311849			Fatty acid metabolism	1	-1000	1000	0	1	2.3.1.7
RCR10676	RCR10676[r]	m02051[r] + m01597[r] <==> m02052[r] + m02348[r]	311849			Fatty acid metabolism	1	-1000	1000	0	1	2.3.1.7
RCR10677	RCR10677[r]	m01724[r] + m01597[r] <==> m01725[r] + m02348[r]	311849			Fatty acid metabolism	1	-1000	1000	0	1	2.3.1.7
RCR10678	RCR10678[r]	m00016[r] + m02348[r] <==> m01727[r] + m01597[r]	311849			Fatty acid metabolism	1	-1000	1000	0	1	2.3.1.7
RCR10679	RCR10679[r]	m00006[r] + m02348[r] <==> m01726[r] + m01597[r]	311849			Fatty acid metabolism	1	-1000	1000	0	1	2.3.1.7
RCR10680	RCR10680[r]	m02637[r] + m01597[r] <==> m02390[r] + m02348[r]	311849			Fatty acid metabolism	1	-1000	1000	0	1	2.3.1.7
RCR10681	RCR10681[r]	m00095[r] + m02348[r] <==> m01723[r] + m01597[r]	311849			Fatty acid metabolism	1	-1000	1000	0	1	2.3.1.7
RCR10682	CPT[r]	m02388[r] + m01597[r] <==> m02391[r] + m02348[r]	311849			Fatty acid metabolism	1	-1000	1000	0	1	2.3.1.7
RCR10683	RCR10683[r]	m01933[r] + m01597[r] <==> m01934[r] + m02348[r]	311849			Fatty acid metabolism	1	-1000	1000	0	1	2.3.1.7
RCR10684	RCR10684[r]	m01774[r] + m01597[r] <==> m01697[r] + m02348[r]	311849			Fatty acid metabolism	1	-1000	1000	0	1	2.3.1.7
RCR10685	RCR10685[r]	m00119[r] + m02348[r] <==> m02636[r] + m01597[r]	311849			Fatty acid metabolism	1	-1000	1000	0	1	2.3.1.7
RCR10686	RCR10686[r]	m00009[r] + m02348[r] <==> m01770[r] + m01597[r]	311849			Fatty acid metabolism	1	-1000	1000	0	1	2.3.1.7
RCR10687	RCR10687[r]	m03046[r] + m01597[r] <==> m03047[r] + m02348[r]	311849			Fatty acid metabolism	1	-1000	1000	0	1	2.3.1.7
RCR10688	RCR10688[r]	m02970[r] + m01597[r] <==> m02971[r] + m02348[r]	311849			Fatty acid metabolism	1	-1000	1000	0	1	2.3.1.7
RCR10689	1,2-diacyl-sn-glycerol acylhydrolase	m00237[c] + m02040[c] --> m00506[c] + m01810[c]	24254 or 100911615 or 117554 or 24538 or 25702 or 291437 or 361676 or 50682 or 84028			Fatty acid metabolism	0	0	1000	0	1	3.1.1.3		PMID:11812220;PMID:15224187
RCR10690	1,2-diacyl-sn-glycerol acylhydrolase[c]	m00236[c] + m02040[c] --> m00505[c] + m01809[c]	24254 or 100911615 or 117554 or 24538 or 25702 or 291437 or 361676 or 50682 or 84028			Fatty acid metabolism	0	0	1000	0	1	3.1.1.3		PMID:11812220;PMID:15224187
RCR10691	triacylglycerol lipase	m00238[c] + m02040[c] --> m00507[c] + m01811[c]	24254 or 100911615 or 117554 or 24538 or 25702 or 291437 or 361676 or 50682 or 84028			Fatty acid metabolism	0	0	1000	0	1	3.1.1.3		PMID:11812220;PMID:15224187
RCR10692	1-acylglycerol acylhydrolase	m00505[c] + m02040[c] --> m01809[c] + m01983[c]	29254 or 305795 or 499913			Fatty acid metabolism	0	0	1000	0	1	3.1.1.23		PMID:15272052;PMID:8526865;PMID:889853;PMID:9341166;UNIPROT:Q99685
RCR10693	1-acylglycerol acylhydrolase[c]	m00507[c] + m02040[c] --> m01811[c] + m01983[c]	29254 or 305795 or 499913			Fatty acid metabolism	0	0	1000	0	1	3.1.1.23		PMID:15272052;PMID:8526865;PMID:889853;PMID:9341166;UNIPROT:Q99685
RCR10694	hormone-sensitive lipase	m00506[c] + m02040[c] --> m01810[c] + m01983[c]	29254 or 305795 or 499913			Fatty acid metabolism	0	0	1000	0	1	3.1.1.23		PMID:15272052;PMID:8526865;PMID:889853;PMID:9341166;UNIPROT:Q99685
RCR10695	fatty-acyl-ethyl-ester synthase	m00508[c] + m02040[c] --> m01812[c] + m01983[c]	29254 or 305795 or 499913			Fatty acid metabolism	0	0	1000	0	1	3.1.1.23		PMID:15272052;PMID:8526865;PMID:889853;PMID:9341166;UNIPROT:Q99685
RCR10696	acyl-CoA oxidase[p]	m02345[p] + m02630[p] --> m00042[p] + m02041[p]	50681 or 83522			Beta oxidation of fatty acids	0	0	1000	0	1	1.3.3.6		PMID:17603022;PMID:6240978;PMID:7876265;PMID17603022;PMID6240978;PMID7876265
RCR10697	Cholesterol-sulfate sulfohydrolase	m01512[c] + m02040[c] --> m02946[c] + m01450[c]	24800			Steroid metabolism	0	0	1000	0	1	3.1.6.2		PMID:1606923;PMID:10049998
RCR10698	11-Deoxycortisol delta5-delat4-isomerase	m00406[c] + m02552[c] --> m00295[c] + m02553[c] + m02039[c]	682974 or 100911154 or 360348 or 100911116			Steroid metabolism	0	0	1000	0	1	1.1.1.145;5.3.3.1
RCR10699	UDPglucuronate beta-D-glucuronosyltransferase(acceptor-unspecific)	m01396[r] + 2 m03109[r] --> m01397[r] + 2 m03106[r]				Steroid metabolism	0	0	1000	0	1	2.4.1.17		PMID:10575553;PMID:12920162;PMID:16399341;PMID15117964;PMID9295054
RCR10700	Pregnenolone:NAD+ 3-oxidoreductase	m02763[c] + m02552[c] --> m02769[c] + m02553[c] + m02039[c]	682974 or 100911154 or 360348 or 100911116			Steroid metabolism	0	0	1000	0	1	5.3.3.1		PMID16023337
RCR10701	Steroid 11-beta-hydroxylase	m00294[m] + m02555[m] + 2 m02630[m] + m02039[m] --> m01309[m] + m02554[m] + 2 m02040[m]	100910462 or 24294			Steroid metabolism	0	0	1000	0	1	1.14.15.5		PMID1741400
RCR10702	5alpha-Dihydrotestosterone sulfotransferase	m01069[c] + m02682[c] --> m01071[c] + m02681[c]	24912 or 24902			Steroid metabolism	0	0	1000	0	1	2.8.2.14
RCR10703	17alpha-Hydroxypregnenolone:NAD+ 3-oxidoreductase[c]	m00408[c] + m02552[c] --> m02761[c] + m02553[c] + m02039[c]	682974 or 100911154 or 360348 or 100911116			Steroid metabolism	0	0	1000	0	1	1.1.1.145		PMID:2243100;PMID:2770297;PMID:1944309;PMID:12832414
RCR10704	steroid DELTA-isomerase	m02761[c] --> m00409[c]	682974 or 100911154 or 360348 or 100911116			Steroid metabolism	0	0	1000	0	1	5.3.3.1		PMID:2243100
RCR10705	Androsterone:NAD+ oxidoreductase	m01064[c] + m02553[c] + m02039[c] --> m01338[c] + m02552[c]	191574			Steroid metabolism	0	0	1000	0	1	1.1.1.209;1.1.1.213;1.1.1.50		PMID12943710;PMID7998972
RCR10706	steryl-sulfatase[c]	m01069[c] + m02946[c] <==> m01071[c] + m02040[c]	24800			Steroid metabolism	1	-1000	1000	0	1	3.1.6.2		PMID:11886493
RCR10707	farnesyl-diphosphate:farnesyl-diphosphate farnesyltransferase	m02764[c] + m02759[c] <==> 2 m01806[c]	29580			Cholesterol metabolism	1	-1000	1000	0	1	2.5.1.21		PMID:10896663;PMID:11108725;PMID:1527001;PMID:17180682;PMID:7864626;PMID:8509416
RCR10708	3beta-hydroxysteroid-4alpha-carboxylate 3-dehydrogenase (decarboxylating)	m00953[c] + m02552[c] --> m00809[c] + m01596[c] + m02553[c] + m02039[c]	309262			Cholesterol metabolism	0	0	1000	0	1	1.1.1.170		PMID:14506130;PMID:10369263;PMID:11969204;PMID:12837764;PMID:7946524
RCR10709	5alpha-Cholest-7-en-3beta-ol delta7-delta8-isomerase	m01449[c] --> m02343[c]	117278			Cholesterol metabolism	0	0	1000	0	1	5.3.3.5		PMID:11111101;PMID:12133002;PMID:4475632;PMID:5810070;UNIPROT:Q15125
RCR10710	acetyl-CoA:acetoacetyl-CoA C-acetyltransferase (thioester-hydrolysing, carboxymethyl-forming)	m01255[c] + m01261[c] + m02040[c] --> m02131[c] + m01597[c]	24450 or 29637			Cholesterol metabolism	0	0	1000	0	1	2.3.3.10		PMID:7913309;PMID:11087424;PMID:11108725;PMID:1358203;PMID:7893153
RCR10711	Acetyl-CoA:acetyl-CoA C-acetyltransferase[p]	m01255[p] + m01597[p] <==> 2 m01261[p]	308100 or 365096			Cholesterol metabolism	1	-1000	1000	0	1	2.3.1.9		PMID:10064897;PMID:10806397;PMID:1121274;PMID:11330060;PMID:15733928;PMID:1679347;PMID:16927236;PMID:17236799;PMID:1735445;PMID:1979337;PMID:3194209;PMID:6131897;PMID:6378901;PMID:7911016;PMID:8241273;PMID11108725
RCR10712	microsomal P-450	m02969[c] + m02630[c] + 2 m02039[c] --> m00432[c] + m02040[c]	24296 or 24297 or 25086 or 25426 or 310848 or 246767 or 24307 or 54246 or 308445 or 25147 or 65210 or 24299 or 56266 or 503122 or 293989 or 24894 or 29277 or 29298 or 361523 or 171522 or 24303 or 286953 or 100361492 or 266682 or 170509 or 313373			Steroid metabolism	0	0	1000	0	1	1.14.14.1
RCR10713	peroxidase	m00650[r] + m02041[r] <==> m01792[r] + 2 m02039[r] + m02040[r]	94167 or 287610 or 303414 or 54314 or 303413			Steroid metabolism	1	-1000	0	0	1	1.11.1.7;1.11.1.8;1.11.2.2	problematic
RCR10714	myeloperoxidase	m00413[c] + 2 m02040[c] <==> m00986[c] + m02041[c]	94167 or 287610 or 303414 or 54314 or 303413			Steroid metabolism	1	-1000	0	0	1	1.11.1.7;1.11.1.8;1.11.2.2	problematic
RCR10715	myeloperoxidase[c]	m00411[c] + 2 m02039[c] + m02040[c] <==> m00649[c] + m02041[c]	94167 or 287610 or 303414 or 54314 or 303413			Steroid metabolism	1	-1000	0	0	1	1.11.1.7;1.11.1.8;1.11.2.2	problematic
RCR10716	RCR10716[r]	m01451[r] <==> 1e-04 m01452[r] + 1e-04 m01453[r] + 1e-04 m01454[r] + 1e-04 m01455[r] + 1e-04 m01456[r] + 1e-04 m01457[r] + 1e-04 m01458[r] + 1e-04 m01459[r] + 1e-04 m01460[r] + 1e-04 m01461[r] + 1e-04 m01462[r] + 1e-04 m01463[r] + 1e-04 m01464[r] + 1e-04 m01465[r] + 1e-04 m01467[r] + 1e-04 m01469[r] + 1e-04 m01470[r] + 1e-04 m01471[r] + 1e-04 m01472[r] + 1e-04 m01473[r] + 1e-04 m01474[r] + 1e-04 …				Biomass	1	-1000	0	0	1
RCR10717	Acyl-CoA:cholesterol O-acyltransferase	m02345[r] + m01450[r] --> m01498[r] + m01597[r]	81782 or 266770			Cholesterol-ester metabolism	0	0	1000	0	1	2.3.1.26
RCR10718	Acyl-CoA:cholesterol O-acyltransferase[r]	m03050[r] + m01450[r] --> m01510[r] + m01597[r]	81782 or 266770			Cholesterol-ester metabolism	0	0	1000	0	1	2.3.1.26
RCR10719	sterol O-acyltransferase	m00129[r] + m01450[r] --> m01487[r] + m01597[r]	81782 or 266770			Cholesterol-ester metabolism	0	0	1000	0	1	2.3.1.26
RCR10720	sterol O-acyltransferase[r]	m00118[r] + m01450[r] --> m01479[r] + m01597[r]	81782 or 266770			Cholesterol-ester metabolism	0	0	1000	0	1	2.3.1.26
RCR10721	cholesterol acyltransferase	m01141[r] + m01450[r] --> m01470[r] + m01597[r]	81782 or 266770			Cholesterol-ester metabolism	0	0	1000	0	1	2.3.1.26
RCR10722	sterol-ester synthase	m02689[r] + m01450[r] --> m01506[r] + m01597[r]	81782 or 266770			Cholesterol-ester metabolism	0	0	1000	0	1	2.3.1.26
RCR10723	sterol-ester synthetase	m02678[r] + m01450[r] --> m01504[r] + m01597[r]	81782 or 266770			Cholesterol-ester metabolism	0	0	1000	0	1	2.3.1.26		PMID:2760547;PMID:7822296;PMID:9242919
RCR10724	acyl coenzyme A-cholesterol-O-acyltransferase	m01191[r] + m01450[r] --> m01477[r] + m01597[r]	81782 or 266770			Cholesterol-ester metabolism	0	0	1000	0	1	2.3.1.26
RCR10725	acyl-CoA:cholesterol acyltransferase	m02677[r] + m01450[r] --> m01505[r] + m01597[r]	81782 or 266770			Cholesterol-ester metabolism	0	0	1000	0	1	2.3.1.26		PMID:2760547;PMID:7822296;PMID:9242919
RCR10726	ACAT	m02101[r] + m01450[r] --> m01495[r] + m01597[r]	81782 or 266770			Cholesterol-ester metabolism	0	0	1000	0	1	2.3.1.26
RCR10727	acylcoenzyme A:cholesterol O-acyltransferase	m00004[r] + m01450[r] --> m01454[r] + m01597[r]	81782 or 266770			Cholesterol-ester metabolism	0	0	1000	0	1	2.3.1.26
RCR10728	cholesterol ester synthase	m01237[r] + m01450[r] --> m01485[r] + m01597[r]	81782 or 266770			Cholesterol-ester metabolism	0	0	1000	0	1	2.3.1.26
RCR10729	cholesterol ester synthetase	m02941[r] + m01450[r] --> m01507[r] + m01597[r]	81782 or 266770			Cholesterol-ester metabolism	0	0	1000	0	1	2.3.1.26		PMID:2760547;PMID:7822296;PMID:9242919
RCR10730	cholesteryl ester synthetase	m00020[r] + m01450[r] --> m01464[r] + m01597[r]	81782 or 266770			Cholesterol-ester metabolism	0	0	1000	0	1	2.3.1.26
RCR10731	cholesterol acyltransferase[r]	m01586[r] + m01450[r] --> m01489[r] + m01597[r]	81782 or 266770			Cholesterol-ester metabolism	0	0	1000	0	1	2.3.1.26
RCR10732	sterol-ester synthase[r]	m02647[r] + m01450[r] --> m01503[r] + m01597[r]	81782 or 266770			Cholesterol-ester metabolism	0	0	1000	0	1	2.3.1.26		PMID:2760547;PMID:7822296;PMID:9242919
RCR10733	sterol-ester synthetase[r]	m00127[r] + m01450[r] --> m01486[r] + m01597[r]	81782 or 266770			Cholesterol-ester metabolism	0	0	1000	0	1	2.3.1.26
RCR10734	acyl coenzyme A-cholesterol-O-acyltransferase[r]	m00106[r] + m01450[r] --> m01474[r] + m01597[r]	81782 or 266770			Cholesterol-ester metabolism	0	0	1000	0	1	2.3.1.26
RCR10735	acyl-CoA:cholesterol acyltransferase[r]	m02612[r] + m01450[r] --> m01502[r] + m01597[r]	81782 or 266770			Cholesterol-ester metabolism	0	0	1000	0	1	2.3.1.26
RCR10736	ACAT[r]	m01773[r] + m01450[r] --> m01492[r] + m01597[r]	81782 or 266770			Cholesterol-ester metabolism	0	0	1000	0	1	2.3.1.26
RCR10737	acylcoenzyme A:cholesterol O-acyltransferase[r]	m00018[r] + m01450[r] --> m01463[r] + m01597[r]	81782 or 266770			Cholesterol-ester metabolism	0	0	1000	0	1	2.3.1.26
RCR10738	cholesterol ester synthase[r]	m00007[r] + m01450[r] --> m01458[r] + m01597[r]	81782 or 266770			Cholesterol-ester metabolism	0	0	1000	0	1	2.3.1.26
RCR10739	cholesterol ester synthetase[r]	m01236[r] + m01450[r] --> m01484[r] + m01597[r]	81782 or 266770			Cholesterol-ester metabolism	0	0	1000	0	1	2.3.1.26
RCR10740	cholesteryl ester synthetase[r]	m00123[r] + m01450[r] --> m01481[r] + m01597[r]	81782 or 266770			Cholesterol-ester metabolism	0	0	1000	0	1	2.3.1.26
RCR10741	RCR10741[r]	m00101[r] + m01450[r] --> m01469[r] + m01597[r]	81782 or 266770			Cholesterol-ester metabolism	0	0	1000	0	1	2.3.1.26
RCR10742	RCR10742[r]	m02052[r] + m01450[r] --> m01494[r] + m01597[r]	81782 or 266770			Cholesterol-ester metabolism	0	0	1000	0	1	2.3.1.26
RCR10743	RCR10743[r]	m01725[r] + m01450[r] --> m01491[r] + m01597[r]	81782 or 266770			Cholesterol-ester metabolism	0	0	1000	0	1	2.3.1.26
RCR10744	RCR10744[r]	m00016[r] + m01450[r] --> m01462[r] + m01597[r]	81782 or 266770			Cholesterol-ester metabolism	0	0	1000	0	1	2.3.1.26
RCR10745	RCR10745[r]	m00006[r] + m01450[r] --> m01457[r] + m01597[r]	81782 or 266770			Cholesterol-ester metabolism	0	0	1000	0	1	2.3.1.26
RCR10746	RCR10746[r]	m03047[r] + m01450[r] --> m01509[r] + m01597[r]	81782 or 266770			Cholesterol-ester metabolism	0	0	1000	0	1	2.3.1.26
RCR10747	RCR10747[r]	m02971[r] + m01450[r] --> m01508[r] + m01597[r]	81782 or 266770			Cholesterol-ester metabolism	0	0	1000	0	1	2.3.1.26
RCR10748	RCR10748[r]	m00025[r] + m01450[r] --> m01465[r] + m01597[r]	81782 or 266770			Cholesterol-ester metabolism	0	0	1000	0	1	2.3.1.26
RCR10749	RCR10749[r]	m02390[r] + m01450[r] --> m01500[r] + m01597[r]	81782 or 266770			Cholesterol-ester metabolism	0	0	1000	0	1	2.3.1.26		PMID:2760547;PMID:7822296;PMID:9242919
RCR10750	RCR10750[r]	m00108[r] + m01450[r] --> m01473[r] + m01597[r]	81782 or 266770			Cholesterol-ester metabolism	0	0	1000	0	1	2.3.1.26
RCR10751	RCR10751[r]	m00125[r] + m01450[r] --> m01480[r] + m01597[r]	81782 or 266770			Cholesterol-ester metabolism	0	0	1000	0	1	2.3.1.26
RCR10752	RCR10752[r]	m00103[r] + m01450[r] --> m01468[r] + m01597[r]	81782 or 266770			Cholesterol-ester metabolism	0	0	1000	0	1	2.3.1.26
RCR10753	RCR10753[r]	m00121[r] + m01450[r] --> m01475[r] + m01597[r]	81782 or 266770			Cholesterol-ester metabolism	0	0	1000	0	1	2.3.1.26
RCR10754	RCR10754[r]	m00134[r] + m01450[r] --> m01482[r] + m01597[r]	81782 or 266770			Cholesterol-ester metabolism	0	0	1000	0	1	2.3.1.26
RCR10755	RCR10755[r]	m00113[r] + m01450[r] --> m01471[r] + m01597[r]	81782 or 266770			Cholesterol-ester metabolism	0	0	1000	0	1	2.3.1.26
RCR10756	RCR10756[r]	m00095[r] + m01450[r] --> m01466[r] + m01597[r]	81782 or 266770			Cholesterol-ester metabolism	0	0	1000	0	1	2.3.1.26
RCR10757	RCR10757[r]	m00012[r] + m01450[r] --> m01455[r] + m01597[r]	81782 or 266770			Cholesterol-ester metabolism	0	0	1000	0	1	2.3.1.26
RCR10758	RCR10758[r]	m00343[r] + m01450[r] --> m01460[r] + m01597[r]	81782 or 266770			Cholesterol-ester metabolism	0	0	1000	0	1	2.3.1.26
RCR10759	RCR10759[r]	m02391[r] + m01450[r] --> m01499[r] + m01597[r]	81782 or 266770			Cholesterol-ester metabolism	0	0	1000	0	1	2.3.1.26		PMID:2760547;PMID:7822296;PMID:9242919
RCR10760	RCR10760[r]	m01934[r] + m01450[r] --> m01493[r] + m01597[r]	81782 or 266770			Cholesterol-ester metabolism	0	0	1000	0	1	2.3.1.26		PMID:2760547;PMID:7822296;PMID:9242919
RCR10761	RCR10761[r]	m01697[r] + m01450[r] --> m01490[r] + m01597[r]	81782 or 266770			Cholesterol-ester metabolism	0	0	1000	0	1	2.3.1.26
RCR10762	RCR10762[r]	m01364[r] + m01450[r] --> m01488[r] + m01597[r]	81782 or 266770			Cholesterol-ester metabolism	0	0	1000	0	1	2.3.1.26		PMID:2760547;PMID:7822296;PMID:9242919
RCR10763	RCR10763[r]	m00119[r] + m01450[r] --> m01476[r] + m01597[r]	81782 or 266770			Cholesterol-ester metabolism	0	0	1000	0	1	2.3.1.26
RCR10764	RCR10764[r]	m00131[r] + m01450[r] --> m01483[r] + m01597[r]	81782 or 266770			Cholesterol-ester metabolism	0	0	1000	0	1	2.3.1.26
RCR10765	RCR10765[r]	m00110[r] + m01450[r] --> m01472[r] + m01597[r]	81782 or 266770			Cholesterol-ester metabolism	0	0	1000	0	1	2.3.1.26
RCR10766	RCR10766[r]	m00093[r] + m01450[r] --> m01467[r] + m01597[r]	81782 or 266770			Cholesterol-ester metabolism	0	0	1000	0	1	2.3.1.26
RCR10767	RCR10767[r]	m00009[r] + m01450[r] --> m01456[r] + m01597[r]	81782 or 266770			Cholesterol-ester metabolism	0	0	1000	0	1	2.3.1.26
RCR10768	RCR10768[r]	m00023[r] + m01450[r] --> m01461[r] + m01597[r]	81782 or 266770			Cholesterol-ester metabolism	0	0	1000	0	1	2.3.1.26
RCR10769	Steryl-ester acylhydrolase	m01498[r] + m02040[r] --> m02344[r] + m01450[r]	25055 or 24254			Cholesterol-ester metabolism	0	0	1000	0	1	3.1.1.13
RCR10770	Steryl-ester acylhydrolase[r]	m01510[r] + m02040[r] --> m03051[r] + m01450[r]	25055 or 24254			Cholesterol-ester metabolism	0	0	1000	0	1	3.1.1.13
RCR10771	sterol esterase[r]	m01501[r] + m02040[r] --> m02494[r] + m01450[r]	25055 or 24254			Cholesterol-ester metabolism	0	0	1000	0	1	3.1.1.13
RCR10772	cholesterol esterase	m01487[r] + m02040[r] --> m00128[r] + m01450[r]	25055 or 24254			Cholesterol-ester metabolism	0	0	1000	0	1	3.1.1.13
RCR10773	cholesteryl ester synthase	m01479[r] + m02040[r] --> m00117[r] + m01450[r]	25055 or 24254			Cholesterol-ester metabolism	0	0	1000	0	1	3.1.1.13
RCR10774	triterpenol esterase	m01470[r] + m02040[r] --> m02745[r] + m01450[r]	25055 or 24254			Cholesterol-ester metabolism	0	0	1000	0	1	3.1.1.13
RCR10775	cholesteryl esterase	m01506[r] + m02040[r] --> m02690[r] + m01450[r]	25055 or 24254			Cholesterol-ester metabolism	0	0	1000	0	1	3.1.1.13
RCR10776	cholesteryl ester hydrolase	m01504[r] + m02040[r] --> m02674[r] + m01450[r]	25055 or 24254			Cholesterol-ester metabolism	0	0	1000	0	1	3.1.1.13		PMID:11230747;PMID:8112342
RCR10777	sterol ester hydrolase	m01477[r] + m02040[r] --> m01197[r] + m01450[r]	25055 or 24254			Cholesterol-ester metabolism	0	0	1000	0	1	3.1.1.13
RCR10778	cholesterol ester hydrolase	m01505[r] + m02040[r] --> m02675[r] + m01450[r]	25055 or 24254			Cholesterol-ester metabolism	0	0	1000	0	1	3.1.1.13		PMID:11230747;PMID:8112342
RCR10779	cholesterase	m01495[r] + m02040[r] --> m02456[r] + m01450[r]	25055 or 24254			Cholesterol-ester metabolism	0	0	1000	0	1	3.1.1.13
RCR10780	acylcholesterol lipase	m01454[r] + m02040[r] --> m00003[r] + m01450[r]	25055 or 24254			Cholesterol-ester metabolism	0	0	1000	0	1	3.1.1.13
RCR10781	cholesterol esterase[r]	m01485[r] + m02040[r] --> m01238[r] + m01450[r]	25055 or 24254			Cholesterol-ester metabolism	0	0	1000	0	1	3.1.1.13
RCR10782	cholesteryl ester synthase[r]	m01507[r] + m02040[r] --> m02938[r] + m01450[r]	25055 or 24254			Cholesterol-ester metabolism	0	0	1000	0	1	3.1.1.13		PMID:11230747;PMID:8112342
RCR10783	triterpenol esterase[r]	m01464[r] + m02040[r] --> m00019[r] + m01450[r]	25055 or 24254			Cholesterol-ester metabolism	0	0	1000	0	1	3.1.1.13
RCR10784	cholesteryl esterase[r]	m01489[r] + m02040[r] --> m01585[r] + m01450[r]	25055 or 24254			Cholesterol-ester metabolism	0	0	1000	0	1	3.1.1.13
RCR10785	cholesteryl ester hydrolase[r]	m01503[r] + m02040[r] --> m02646[r] + m01450[r]	25055 or 24254			Cholesterol-ester metabolism	0	0	1000	0	1	3.1.1.13		PMID:11230747;PMID:8112342
RCR10786	sterol ester hydrolase[r]	m01486[r] + m02040[r] --> m01778[r] + m01450[r]	25055 or 24254			Cholesterol-ester metabolism	0	0	1000	0	1	3.1.1.13
RCR10787	cholesterol ester hydrolase[r]	m01474[r] + m02040[r] --> m00104[r] + m01450[r]	25055 or 24254			Cholesterol-ester metabolism	0	0	1000	0	1	3.1.1.13
RCR10788	cholesterase[r]	m01502[r] + m02040[r] --> m02613[r] + m01450[r]	25055 or 24254			Cholesterol-ester metabolism	0	0	1000	0	1	3.1.1.13
RCR10789	acylcholesterol lipase[r]	m01492[r] + m02040[r] --> m01771[r] + m01450[r]	25055 or 24254			Cholesterol-ester metabolism	0	0	1000	0	1	3.1.1.13
RCR10790	RCR10790[r]	m01463[r] + m02040[r] --> m00017[r] + m01450[r]	25055 or 24254			Cholesterol-ester metabolism	0	0	1000	0	1	3.1.1.13
RCR10791	RCR10791[r]	m01458[r] + m02040[r] --> m01584[r] + m01450[r]	25055 or 24254			Cholesterol-ester metabolism	0	0	1000	0	1	3.1.1.13
RCR10792	RCR10792[r]	m01484[r] + m02040[r] --> m01235[r] + m01450[r]	25055 or 24254			Cholesterol-ester metabolism	0	0	1000	0	1	3.1.1.13
RCR10793	RCR10793[r]	m01481[r] + m02040[r] --> m01207[r] + m01450[r]	25055 or 24254			Cholesterol-ester metabolism	0	0	1000	0	1	3.1.1.13
RCR10794	RCR10794[r]	m01469[r] + m02040[r] --> m02457[r] + m01450[r]	25055 or 24254			Cholesterol-ester metabolism	0	0	1000	0	1	3.1.1.13
RCR10795	RCR10795[r]	m01494[r] + m02040[r] --> m02053[r] + m01450[r]	25055 or 24254			Cholesterol-ester metabolism	0	0	1000	0	1	3.1.1.13
RCR10796	RCR10796[r]	m01491[r] + m02040[r] --> m01373[r] + m01450[r]	25055 or 24254			Cholesterol-ester metabolism	0	0	1000	0	1	3.1.1.13
RCR10797	RCR10797[r]	m01462[r] + m02040[r] --> m01583[r] + m01450[r]	25055 or 24254			Cholesterol-ester metabolism	0	0	1000	0	1	3.1.1.13
RCR10798	RCR10798[r]	m01457[r] + m02040[r] --> m01582[r] + m01450[r]	25055 or 24254			Cholesterol-ester metabolism	0	0	1000	0	1	3.1.1.13
RCR10799	RCR10799[r]	m01509[r] + m02040[r] --> m03045[r] + m01450[r]	25055 or 24254			Cholesterol-ester metabolism	0	0	1000	0	1	3.1.1.13
RCR10800	RCR10800[r]	m01508[r] + m02040[r] --> m02385[r] + m01450[r]	25055 or 24254			Cholesterol-ester metabolism	0	0	1000	0	1	3.1.1.13
RCR10801	RCR10801[r]	m01465[r] + m02040[r] --> m02564[r] + m01450[r]	25055 or 24254			Cholesterol-ester metabolism	0	0	1000	0	1	3.1.1.13
RCR10802	RCR10802[r]	m01496[r] + m02040[r] --> m01432[r] + m01450[r]	25055 or 24254			Cholesterol-ester metabolism	0	0	1000	0	1	3.1.1.13
RCR10803	RCR10803[r]	m01497[r] + m02040[r] --> m03153[r] + m01450[r]	25055 or 24254			Cholesterol-ester metabolism	0	0	1000	0	1	3.1.1.13
RCR10804	RCR10804[r]	m01500[r] + m02040[r] --> m02389[r] + m01450[r]	25055 or 24254			Cholesterol-ester metabolism	0	0	1000	0	1	3.1.1.13		PMID:11230747;PMID:8112342
RCR10805	RCR10805[r]	m01473[r] + m02040[r] --> m02939[r] + m01450[r]	25055 or 24254			Cholesterol-ester metabolism	0	0	1000	0	1	3.1.1.13
RCR10806	RCR10806[r]	m01480[r] + m02040[r] --> m02648[r] + m01450[r]	25055 or 24254			Cholesterol-ester metabolism	0	0	1000	0	1	3.1.1.13
RCR10807	RCR10807[r]	m01468[r] + m02040[r] --> m01784[r] + m01450[r]	25055 or 24254			Cholesterol-ester metabolism	0	0	1000	0	1	3.1.1.13
RCR10808	RCR10808[r]	m01475[r] + m02040[r] --> m01741[r] + m01450[r]	25055 or 24254			Cholesterol-ester metabolism	0	0	1000	0	1	3.1.1.13
RCR10809	RCR10809[r]	m01482[r] + m02040[r] --> m00135[r] + m01450[r]	25055 or 24254			Cholesterol-ester metabolism	0	0	1000	0	1	3.1.1.13
RCR10810	RCR10810[r]	m01471[r] + m02040[r] --> m00114[r] + m01450[r]	25055 or 24254			Cholesterol-ester metabolism	0	0	1000	0	1	3.1.1.13
RCR10811	RCR10811[r]	m01466[r] + m02040[r] --> m01689[r] + m01450[r]	25055 or 24254			Cholesterol-ester metabolism	0	0	1000	0	1	3.1.1.13
RCR10812	RCR10812[r]	m01455[r] + m02040[r] --> m00010[r] + m01450[r]	25055 or 24254			Cholesterol-ester metabolism	0	0	1000	0	1	3.1.1.13
RCR10813	RCR10813[r]	m01460[r] + m02040[r] --> m00341[r] + m01450[r]	25055 or 24254			Cholesterol-ester metabolism	0	0	1000	0	1	3.1.1.13
RCR10814	RCR10814[r]	m01499[r] + m02040[r] --> m02387[r] + m01450[r]	25055 or 24254			Cholesterol-ester metabolism	0	0	1000	0	1	3.1.1.13		PMID:11230747;PMID:8112342
RCR10815	RCR10815[r]	m01493[r] + m02040[r] --> m01932[r] + m01450[r]	25055 or 24254			Cholesterol-ester metabolism	0	0	1000	0	1	3.1.1.13		PMID:11230747;PMID:8112342
RCR10816	RCR10816[r]	m01490[r] + m02040[r] --> m01696[r] + m01450[r]	25055 or 24254			Cholesterol-ester metabolism	0	0	1000	0	1	3.1.1.13
RCR10817	RCR10817[r]	m01488[r] + m02040[r] --> m01362[r] + m01450[r]	25055 or 24254			Cholesterol-ester metabolism	0	0	1000	0	1	3.1.1.13		PMID:11230747;PMID:8112342
RCR10818	RCR10818[r]	m01476[r] + m02040[r] --> m01291[r] + m01450[r]	25055 or 24254			Cholesterol-ester metabolism	0	0	1000	0	1	3.1.1.13
RCR10819	RCR10819[r]	m01483[r] + m02040[r] --> m00132[r] + m01450[r]	25055 or 24254			Cholesterol-ester metabolism	0	0	1000	0	1	3.1.1.13
RCR10820	RCR10820[r]	m01472[r] + m02040[r] --> m00111[r] + m01450[r]	25055 or 24254			Cholesterol-ester metabolism	0	0	1000	0	1	3.1.1.13
RCR10821	RCR10821[r]	m01467[r] + m02040[r] --> m00094[r] + m01450[r]	25055 or 24254			Cholesterol-ester metabolism	0	0	1000	0	1	3.1.1.13
RCR10822	RCR10822[r]	m01456[r] + m02040[r] --> m00008[r] + m01450[r]	25055 or 24254			Cholesterol-ester metabolism	0	0	1000	0	1	3.1.1.13
RCR10823	RCR10823[r]	m01461[r] + m02040[r] --> m00021[r] + m01450[r]	25055 or 24254			Cholesterol-ester metabolism	0	0	1000	0	1	3.1.1.13
RCR10824	ceramide:phosphatidylcholine cholinephosphotransferase	m01430[c] + m02684[c] --> m00240[c] + m02908[c]	310849 or 353229			Sphingolipid metabolism	0	0	1000	0	1	2.7.8.27		PMID:17449912;PMID:14685263;PMID:19233134;PMID:4339164;PMID:4817756;PMID:17982138;PMID14685263
RCR10825	sphingosine-1-phosphate palmitaldehyde-lyase (phosphoethanolamine-forming)	m02930[c] --> m02116[c] + m01798[c]	286896			Sphingolipid metabolism	0	0	1000	0	1	4.1.2.27		PMID:18558101;PMID:11018465;PMID:2061324;PMID:5432798
RCR10826	UDP-alpha-D-galactose:beta-D-glucosyl-(1<->1)-ceramide 4-beta-D-galactosyltransferase	m01972[g] + m03107[g] --> m02328[g] + m03106[g]	290638			Sphingolipid metabolism	0	0	1000	0	1	2.4.1.-
RCR10827	Lactosylceramide 4-alpha-galactosyltransferase	m02328[g] + m03107[g] --> m01960[g] + m03106[g]	63888			Sphingolipid metabolism	0	0	1000	0	1	2.4.1.228
RCR10828	UDP-GlcNAc:betaGal beta-1,3-N-acetylglucosaminyltransferase 3, Golgi apparatus	m02014[g] + m03107[g] --> m02009[g] + m03106[g]	290638			Sphingolipid metabolism	0	0	1000	0	1	2.4.1.-
RCR10829	UDPGal-chondroitin acetylgalactosaminyltransferase I, Golgi	m02033[g] + m03110[g] --> m02032[g] + m03106[g]	64828			Sphingolipid metabolism	0	0	1000	0	1	2.4.1.92
RCR10830	Ganglioside O-acetylation	m01947[c] + m01261[c] --> m01244[c] + m01597[c]	64018			Sphingolipid metabolism	0	0	1000	0	1
RCR10831	glyceraldehyde-3-phosphate dehydrogenase	m02033[c] + m01261[c] --> m01245[c] + m01597[c]	64018			Sphingolipid metabolism	0	0	1000	0	1
RCR10832	glycerol:NADP+ oxidoreductase	m01983[m] + m02554[m] --> m01981[m] + m02555[m] + m02039[m]	100145871 or 171178 or 24192 or 78959 or 310903 or 29646 or 24172 or 296972 or 286921			Glycerolipid metabolism	0	0	1000	0	1	1.1.1.1;1.1.1.2;1.1.1.21;1.1.1.72		PMID:11716357;PMID:6753936;PMID:6815419;PMID:8916913;PMID:9693960;PMID11716357;PMID6753936;PMID6815419;PMID8916913;PMID9693960
RCR10833	RCR10833[c]	m02345[c] + m02914[c] --> m00484[c] + m01597[c]	29653 or 305166 or 290843 or 296130			Glycerolipid metabolism	0	0	1000	0	1	2.3.1.15		PMID:12573444;PMID:17170135;PMID:17389595;UNIPROT:AGPAT6;UNIPROT:AGPAT9;UNIPROT:Q6NUI2;UNIPROT:Q9HCL2
RCR10834	RCR10834[c]	m03050[c] + m02914[c] --> m00502[c] + m01597[c]	29653 or 305166 or 290843 or 296130			Glycerolipid metabolism	0	0	1000	0	1	2.3.1.15		PMID:12573444;PMID:17170135;PMID:17389595;UNIPROT:AGPAT6;UNIPROT:AGPAT9;UNIPROT:Q6NUI2;UNIPROT:Q9HCL2
RCR10835	RCR10835[c]	m02495[c] + m02914[c] --> m00493[c] + m01597[c]	29653 or 305166 or 290843 or 296130			Glycerolipid metabolism	0	0	1000	0	1	2.3.1.15		PMID:12573444;PMID:17170135;PMID:17389595;UNIPROT:AGPAT6;UNIPROT:AGPAT9;UNIPROT:Q6NUI2;UNIPROT:Q9HCL2
RCR10836	RCR10836[c]	m02689[c] + m02914[c] --> m00498[c] + m01597[c]	29653 or 305166 or 290843 or 296130			Glycerolipid metabolism	0	0	1000	0	1	2.3.1.15		PMID:12573444;PMID:17170135;PMID:17389595;UNIPROT:AGPAT6;UNIPROT:AGPAT9;UNIPROT:Q6NUI2;UNIPROT:Q9HCL2
RCR10837	RCR10837[c]	m02678[c] + m02914[c] --> m00496[c] + m01597[c]	29653 or 305166 or 290843 or 296130			Glycerolipid metabolism	0	0	1000	0	1	2.3.1.15		PMID:12573444;PMID:17170135;PMID:17389595;UNIPROT:AGPAT6;UNIPROT:AGPAT9;UNIPROT:Q6NUI2;UNIPROT:Q9HCL2
RCR10838	RCR10838[c]	m02677[c] + m02914[c] --> m00497[c] + m01597[c]	29653 or 305166 or 290843 or 296130			Glycerolipid metabolism	0	0	1000	0	1	2.3.1.15		PMID:12573444;PMID:17170135;PMID:17389595;UNIPROT:AGPAT6;UNIPROT:AGPAT9;UNIPROT:Q6NUI2;UNIPROT:Q9HCL2
RCR10839	RCR10839[c]	m02101[c] + m02914[c] --> m00481[c] + m01597[c]	29653 or 305166 or 290843 or 296130			Glycerolipid metabolism	0	0	1000	0	1	2.3.1.15		PMID:12573444;PMID:17170135;PMID:17389595;UNIPROT:AGPAT6;UNIPROT:AGPAT9;UNIPROT:Q6NUI2;UNIPROT:Q9HCL2
RCR10840	RCR10840[c]	m02941[c] + m02914[c] --> m00499[c] + m01597[c]	29653 or 305166 or 290843 or 296130			Glycerolipid metabolism	0	0	1000	0	1	2.3.1.15		PMID:12573444;PMID:17170135;PMID:17389595;UNIPROT:AGPAT6;UNIPROT:AGPAT9;UNIPROT:Q6NUI2;UNIPROT:Q9HCL2
RCR10841	RCR10841[c]	m02647[c] + m02914[c] --> m00495[c] + m01597[c]	29653 or 305166 or 290843 or 296130			Glycerolipid metabolism	0	0	1000	0	1	2.3.1.15		PMID:12573444;PMID:17170135;PMID:17389595;UNIPROT:AGPAT6;UNIPROT:AGPAT9;UNIPROT:Q6NUI2;UNIPROT:Q9HCL2
RCR10842	RCR10842[c]	m02612[c] + m02914[c] --> m00494[c] + m01597[c]	29653 or 305166 or 290843 or 296130			Glycerolipid metabolism	0	0	1000	0	1	2.3.1.15
RCR10843	RCR10843[c]	m01773[c] + m02914[c] --> m00478[c] + m01597[c]	29653 or 305166 or 290843 or 296130			Glycerolipid metabolism	0	0	1000	0	1	2.3.1.15		PMID:12573444;PMID:17170135;PMID:17389595;UNIPROT:AGPAT6;UNIPROT:AGPAT9;UNIPROT:Q6NUI2;UNIPROT:Q9HCL2
RCR10844	RCR10844[c]	m02971[c] + m02914[c] --> m00500[c] + m01597[c]	29653 or 305166 or 290843 or 296130			Glycerolipid metabolism	0	0	1000	0	1	2.3.1.15		PMID:12573444;PMID:17170135;PMID:17389595;UNIPROT:AGPAT6;UNIPROT:AGPAT9;UNIPROT:Q6NUI2;UNIPROT:Q9HCL2
RCR10845	RCR10845[c]	m01934[c] + m02914[c] --> m00479[c] + m01597[c]	29653 or 305166 or 290843 or 296130			Glycerolipid metabolism	0	0	1000	0	1	2.3.1.15		PMID:12573444;PMID:17170135;PMID:17389595;UNIPROT:AGPAT6;UNIPROT:AGPAT9;UNIPROT:Q6NUI2;UNIPROT:Q9HCL2
RCR10846	ATP:acylglycerol 3-phosphotransferase	m00509[c] + m01371[c] --> m00490[c] + m01285[c]	502749			Glycerolipid metabolism	0	0	1000	0	1	2.7.1.94
RCR10847	ATP:acylglycerol 3-phosphotransferase[c]	m00504[c] + m01371[c] --> m00485[c] + m01285[c]	502749			Glycerolipid metabolism	0	0	1000	0	1	2.7.1.94
RCR10848	acylglycerol kinase	m00505[c] + m01371[c] --> m00486[c] + m01285[c]	502749			Glycerolipid metabolism	0	0	1000	0	1	2.7.1.94
RCR10849	acylglycerol kinase[c]	m00507[c] + m01371[c] --> m00488[c] + m01285[c]	502749			Glycerolipid metabolism	0	0	1000	0	1	2.7.1.94
RCR10850	monoacylglycerol kinase	m00506[c] + m01371[c] --> m00487[c] + m01285[c]	502749			Glycerolipid metabolism	0	0	1000	0	1	2.7.1.94
RCR10851	monoacylglycerol kinase (phosphorylating)	m00508[c] + m01371[c] --> m00489[c] + m01285[c]	502749			Glycerolipid metabolism	0	0	1000	0	1	2.7.1.94
RCR10852	ethanolamine-phosphate phosphate-lyase (deaminating,acetaldehyde-forming)	m01798[c] + m02040[c] --> m01249[c] + m02578[c] + m02751[c]	687071			Glycerolipid metabolism	0	0	1000	0	1	4.2.3.2		PMID:5498429
RCR10853	ATP:glycerol 3-phosphotransferase	m01983[c] + m01371[c] --> m02914[c] + m01285[c]	289481 or 79223 or 367146 or 291468			Glycerolipid metabolism	0	0	1000	0	1	2.7.1.30		PMID:15845384;PMID:6316940
RCR10854	phosphatidate cytidylyltransferase	m02727[m] + m01623[m] --> m01426[m] + m02759[m]	81925 or 114101			Glycerolipid metabolism	0	0	1000	0	1	2.7.7.41		PMID:1330695;PMID:9115637;UNIPROT:O95674
RCR10855	acyl-CoA:1-acyl-sn-glycerol-3-phosphate 2-O-acyltransferase	m00486[c] + m01272[c] --> m02729[c] + m01597[c]	316122 or 170919 or 313997 or 406165 or 306582 or 311821 or 294324 or 362702 or 498741			Glycerolipid metabolism	0	0	1000	0	1	2.3.1.51		PMID:16620771;UNIPROT:Q8WTS1;UNIPROT:Q99943
RCR10856	acyl-CoA:1-acyl-sn-glycerol-3-phosphate 2-O-acyltransferase[c]	m00489[c] + m01275[c] --> m02732[c] + m01597[c]	316122 or 170919 or 313997 or 406165 or 306582 or 311821 or 294324 or 362702 or 498741			Glycerolipid metabolism	0	0	1000	0	1	2.3.1.51		PMID:16620771;UNIPROT:Q8WTS1;UNIPROT:Q99943
RCR10857	1,2-diacyl-sn-glycerol 3-phosphate phosphohydrolase	m02729[c] + m02040[c] --> m00236[c] + m02751[c]	246115 or 192270 or 313977 or 362261 or 316737 or 314614 or 295401 or 309014 or 680466 or 64369 or 300443			Glycerolipid metabolism	0	0	1000	0	1	3.1.3.4		PMID:8403799;PMID:9370313
RCR10858	1,2-diacyl-sn-glycerol 3-phosphate phosphohydrolase[c]	m02730[c] + m02040[c] --> m00237[c] + m02751[c]	246115 or 192270 or 313977 or 362261 or 316737 or 314614 or 295401 or 309014 or 680466 or 64369 or 300443			Glycerolipid metabolism	0	0	1000	0	1	3.1.3.4		PMID:8403799;PMID:9370313
RCR10859	CDP-diacylglycerol:myo-inositol 3-phosphatidyltransferase	m01427[r] + m02171[r] --> m02750[r] + m01590[r]	192260			Glycerolipid metabolism	0	0	1000	0	1	2.7.8.11		PMID:9370331
RCR10860	phospholipase D	m02684[c] + m02896[c] --> m02808[c] + m01513[c]	314553			Glycerolipid metabolism	0	0	1000	0	1	2.7.8.29		PMID:10718344;PMID:10600531
RCR10861	choline phosphotransferase	m00235[c] + m01425[c] + m02039[c] --> m02684[c] + m01590[c]	310773 or 362866			Glycerolipid metabolism	0	0	1000	0	1	2.7.8.2		PMID:3029085;PMID:6295501;UNIPROT:Q9Y6K0
RCR10862	Acyl-CoA:1-acyl-sn-glycero-3-phosphocholine O-acyltransferase	m01271[c] + m00656[c] --> m02684[c] + m01597[c]	361467 or 362434 or 100359680 or 296048			Glycerolipid metabolism	0	0	1000	0	1	2.3.1.23
RCR10863	Phosphatidylcholine:sterol O-acyltransferase	m02684[c] + m01450[c] --> m00656[c] + m01451[c]	24530			Glycerolipid metabolism	0	0	1000	0	1	2.3.1.43		PMID:4335615;PMID:4340992;PMID:9829992
RCR10864	1-Acyl-sn-glycero-3-phosphoethanolamine aldehydohydrolase	m00511[c] + m02040[c] --> m02913[c] + m01809[c]	192259 or 246246 or 25514 or 361401			Glycerolipid metabolism	0	0	1000	0	1	3.1.1.5
RCR10865	S-adenosyl-L-methionine:phosphatidyl-N-methylethanolamine N-methyltransferase	m02686[c] + m02877[c] --> m02758[c] + m02871[c]	25511			Glycerolipid metabolism	0	0	1000	0	1	2.1.1.17		PMID:12431977
RCR10866	S-adenosyl-L-methionine:phosphatidyl-N-dimethylethanolamine N-methyltransferase	m02758[c] + m02877[c] + m02039[c] --> m02684[c] + m02871[c]	25511			Glycerolipid metabolism	0	0	1000	0	1	2.1.1.17		PMID:12431977
RCR10867	(N-acetylneuraminyl)-galactosylglucosylceramide N-acetylgalactosaminyltransferase	m02328[c] + m03110[c] --> m01905[c] + m03106[c]	64828			Sphingolipid metabolism	0	0	1000	0	1	2.4.1.92
RCR10868	alpha-N-acetylneuraminyl-2,3-beta-galactosyl-1,3-N-acetylgalactosaminide 6-alpha-sialyltransferase	m02010[c] + m01592[c] --> m01941[c] + m01590[c]	29758 or 407765 or 407764 or 365984			Sphingolipid metabolism	0	0	1000	0	1	2.4.99.-;2.4.99.7
RCR10869	lactosylceramide alpha-2,3-sialyltransferase	m02328[c] + m01592[c] --> m02015[c] + m01590[c]	83505			Sphingolipid metabolism	0	0	1000	0	1	2.4.99.9
RCR10870	exo-alpha-sialidase	m02015[c] + m02040[c] --> m02543[c] + m02328[c]	292073 and 24591 and 316033 and 296370			Sphingolipid metabolism	0	0	1000	0	1	3.2.1.18
RCR10871	N-acetylgalactosaminide alpha-2,6-sialyltransferase (7F)	m01941[c] + m01592[c] --> m02029[c] + m01590[c]	407765			Sphingolipid metabolism	0	0	1000	0	1	2.4.99.-
RCR10872	alpha-N-acetylneuraminate alpha-2,8-sialyltransferase	m02015[c] + m01592[c] --> m01947[c] + m01590[c]	25280			Sphingolipid metabolism	0	0	1000	0	1	2.4.99.8
RCR10873	N-acetylgalactosaminide alpha-2,6-sialyltransferase (7F)[c]	m02030[c] + m01592[c] --> m02024[c] + m01590[c]	407765			Sphingolipid metabolism	0	0	1000	0	1	2.4.99.-
RCR10874	alpha-N-acetylneuraminate alpha-2,8-sialyltransferase[c]	m01941[c] + m01592[c] --> m02030[c] + m01590[c]	25280			Sphingolipid metabolism	0	0	1000	0	1	2.4.99.8
RCR10875	cytidine monophosphoacetylneuraminate-ganglioside GM3	m01947[c] + m01592[c] --> m02033[c] + m01590[c]	25280 or 364901			Sphingolipid metabolism	0	0	1000	0	1	2.4.99.8;2.4.99.-
RCR10876	lactosylceramide 4-alpha-galactosyltransferase	m02328[c] + m03107[c] --> m01960[c] + m03106[c]	63888			Sphingolipid metabolism	0	0	1000	0	1	2.4.1.228
RCR10877	alpha-galactosidase	m01960[c] + m02040[c] --> m02328[c] + m01910[c]	363494			Sphingolipid metabolism	0	0	1000	0	1	3.2.1.22
RCR10878	globotriaosylceramide 3-beta-N-acetylgalactosaminyltransferase	m01960[c] + m03110[c] --> m01959[c] + m03106[c]	310508			Sphingolipid metabolism	0	0	1000	0	1	2.4.1.79
RCR10879	lactosylceramide 1,3-N-acetyl-beta-D-glucosaminyltransferase	m02328[c] + m03111[c] --> m02346[c] + m03106[c]	116740			Sphingolipid metabolism	0	0	1000	0	1	2.4.1.206
RCR10880	glucosaminylgalactosylglucosylceramide beta-galactosyltransferase	m02346[c] + m03107[c] --> m02347[c] + m03106[c]	288161 or 366064 or 686081			Sphingolipid metabolism	0	0	1000	0	1	2.4.1.86
RCR10881	neolactotriaosylceramide beta-1,4-galactosyltransferase	m02346[c] + m03107[c] --> m02683[c] + m03106[c]	303923 or 494342 or 24390 or 313536			Sphingolipid metabolism	0	0	1000	0	1	2.4.1.-
RCR10882	neolactotetraosylceramide alpha-2,3-sialyltransferase	m02683[c] + m01592[c] --> m02904[c] + m01590[c]	304023			Sphingolipid metabolism	0	0	1000	0	1	2.4.99.10
RCR10883	alpha-2,8-sialyltransferase	m02904[c] + m01592[c] --> m00744[c] + m01590[c]	25280			Sphingolipid metabolism	0	0	1000	0	1	2.4.99.8
RCR10884	4-galactosyl-N-acetylglucosaminide 3-alpha-L-fucosyltransferase	m02683[c] + m01950[c] --> m02163[c] + m01948[c]	84597 or 60670			Sphingolipid metabolism	0	0	1000	0	1	2.4.1.152;2.4.1.65;2.4.1.-
RCR10885	D-Glucosyl-N-acylsphingosine glucohydrolase	m01972[l] + m02040[l] --> m01430[l] + m01965[l]	684536 or 406170			Sphingolipid metabolism	0	0	1000	0	1	3.2.1.45
RCR10886	UDP-alpha-D-galactose:N-acylsphingosine D-galactosyltransferase[g]	m01430[g] + m03107[g] --> m01679[g] + m03106[g]	50555			Sphingolipid metabolism	0	0	1000	0	1	2.4.1.45		PMID:9125199;PMID:423891
RCR10887	UDP-alpha-D-galactose:N-acylsphingosine D-galactosyltransferase[r]	m01430[r] + m03107[r] --> m01679[r] + m03106[r]	50555			Sphingolipid metabolism	0	0	1000	0	1	2.4.1.45		PMID:9125199;PMID:423891
RCR10888	RCR10888[c]	m01679[c] + m03107[c] --> m01694[c] + m03106[c]				Sphingolipid metabolism	0	0	1000	0	1	2.4.1.-		PMID:7930586
RCR10889	N-acetylglucosaminylphosphatidylinositol deacetylase	m02523[r] + m02040[r] --> m01143[r] + m01252[r]	192263			Inositol phosphate metabolism	0	0	1000	0	1	3.5.1.89
RCR10890	phosphatidylinositol glycan anchor biosynthesis, class W	m01143[r] + m02678[r] --> m01964[r] + m01597[r]	378774			Inositol phosphate metabolism	0	0	1000	0	1	2.3.-.-
RCR10891	Prostaglandin I2 hydration	m01168[c] <==> m02795[c] + m02040[c]				Eicosanoid metabolism	1	-1000	1000	0	1		spontaneous
RCR10892	RCR10892[c]	m01168[c] + m02553[c] + m02039[c] <==> m02788[c] + m02552[c]				Eicosanoid metabolism	1	-1000	1000	0	1
RCR10893	fatty acid amide hydrolase[c]	m00635[c] + m02040[c] <==> m01983[c] + m01362[c]	29347 or 100911581			Eicosanoid metabolism	1	-1000	1000	0	1	3.5.1.99		PMID:12023533;PMID:11585048
RCR10894	alkyl acylglycerol phosphocholine transferase	m00514[c] + m01425[c] --> m00560[c] + m01590[c]	310773 or 362866			Glycerolipid metabolism	0	0	1000	0	1	2.7.8.2
RCR10895	UDPGal-chondroitin acetylgalactosaminyltransferase I, Golgi[g]	m00762[g] + m03110[g] --> m01568[g] + m03106[g]	306375 or 297554			Proteoglycan metabolism	0	0	1000	0	1	2.4.1.174
RCR10896	beta-N-acetylhexosaminidase A, lysosomal	m01524[l] + 2 m02040[l] --> m01520[l] + m02525[l] + m02946[l]	367166 or 294673 or 300757 or 300993 or 64468 or 500052 or 404783 or 100216475 or 117037			Proteoglycan metabolism	0	0	1000	0	1	3.2.1.35;3.2.1.52
RCR10897	beta-glucuronidase, lysosomal	m01520[l] + m02040[l] --> m01521[l] + m01973[l]	83504 or 24434			Proteoglycan metabolism	0	0	1000	0	1	3.2.1.31		PMID3468507;PMID3924735;PMID3987656
RCR10898	beta-N-acetylhexosaminidase A, lysosomal[l]	m01529[l] + 2 m02040[l] --> m01527[l] + m02525[l] + m02946[l]	367166 or 294673 or 300757 or 300993 or 64468 or 500052 or 404783 or 100216475 or 117037			Proteoglycan metabolism	0	0	1000	0	1	3.2.1.35;3.2.1.52
RCR10899	N-acetyl-beta-D-hexosaminidase	m01539[l] + 2 m02040[l] --> m01535[l] + m02525[l] + m02946[l]	294673 or 300757 or 100216475			Proteoglycan metabolism	0	0	1000	0	1	3.2.1.52
RCR10900	beta-glucuronidase, lysosomal[l]	m01535[l] + m02040[l] --> m01536[l] + m01973[l]	83504 or 24434			Proteoglycan metabolism	0	0	1000	0	1	3.2.1.31		PMID3468507;PMID3924735;PMID3987656
RCR10901	N-acetyl-beta-hexosaminidase	m01536[l] + 2 m02040[l] --> m01538[l] + m02525[l] + m02946[l]	294673 or 300757 or 100216475			Proteoglycan metabolism	0	0	1000	0	1	3.2.1.52
RCR10902	beta-hexosaminidase	m01550[l] + 2 m02040[l] --> m01545[l] + m02525[l] + m02946[l]	294673 or 300757 or 100216475			Proteoglycan metabolism	0	0	1000	0	1	3.2.1.52
RCR10903	beta-acetylhexosaminidinase	m01547[l] + 2 m02040[l] --> m01549[l] + m02525[l] + m02946[l]	294673 or 300757 or 100216475			Proteoglycan metabolism	0	0	1000	0	1	3.2.1.52
RCR10904	glucuronate-2-sulfatase, lysosomal	m01549[l] + m02040[l] --> m01538[l] + m02946[l]				Proteoglycan metabolism	0	0	1000	0	1
RCR10905	hyaluronoglucosaminidase	m01562[l] + 3 m02040[l] --> m01557[l] + m02525[l] + 2 m02946[l]	367166 or 294673 or 300757 or 300993 or 64468 or 500052 or 404783 or 100216475 or 117037			Proteoglycan metabolism	0	0	1000	0	1	3.2.1.35;3.2.1.52
RCR10906	beta-glucuronidase[l]	m01557[l] + m02040[l] --> m01558[l] + m01973[l]	83504 or 24434			Proteoglycan metabolism	0	0	1000	0	1	3.2.1.31		PMID3468507;PMID3924735;PMID3987656
RCR10907	beta-D-N-acetylhexosaminidase	m01558[l] + 3 m02040[l] --> m01561[l] + m02525[l] + 2 m02946[l]	294673 or 300757 or 100216475			Proteoglycan metabolism	0	0	1000	0	1	3.2.1.52
RCR10908	3-alpha hydroxysteroid dehydrogenase, type I	m01177[c] + m02553[c] + m02039[c] --> m01078[c] + m02552[c]	191574			Bile acid metabolism	0	0	1000	0	1	1.1.1.50		PMID:1591235;PMID:3459552;PMID12943710;PMID7998972
RCR10909	5beta-Cholestane-3alpha,7alpha,12alpha-triol,NADPH:oxygen oxidoreductase (26-hydroxylating)	m01078[m] + m02555[m] + m02630[m] + m02039[m] --> m01090[m] + m02554[m] + m02040[m]	301517			Bile acid metabolism	0	0	1000	0	1	1.14.13.15		PMID:1708392;PMID:2019602;PMID:9660774
RCR10910	5beta-Cholestane-3alpha,7alpha,12alpha,26-tetraol:NAD+ 26-oxidoreductase[c]	m01090[c] + m02552[c] --> m00750[c] + m02553[c] + m02039[c]	301517			Bile acid metabolism	0	0	1000	0	1	1.14.13.15		PMID:1591235;PMID:6338006
RCR10911	3alpha,7alpha,12alpha-Trihydroxy-5beta-cholestan-26-al:NAD+ 26-oxidoreductase	m00750[c] + m02552[c] + m02040[c] --> m00752[c] + m02553[c] + m02039[c]	301517			Bile acid metabolism	0	0	1000	0	1	1.14.13.15		PMID:1591235;PMID:5723340;PMID:5914340;PMID1591235;PMID5723340;PMID5914340
RCR10912	5-beta-cholestane-3-alpha,7-alpha,12-alpha-triol 27-hydroxylase	m00750[m] + m02553[m] + m02630[m] + m02039[m] --> m00752[m] + m02552[m] + m02040[m]	301517			Bile acid metabolism	0	0	1000	0	1	1.14.13.15
RCR10913	3alpha,7alpha,12alpha-trihydroxy-5beta-cholestanoate,NADPH:oxygen oxidoreductase (26-hydroxylating)	m00750[m] + m02555[m] + m02630[m] + m02039[m] --> m00752[m] + m02554[m] + m02040[m]	301517			Bile acid metabolism	0	0	1000	0	1	1.14.13.15		PMID:1708392;PMID:9660774
RCR10914	3alpha,7alpha,12alpha-trihydroxy-5beta-cholestanoate:CoA ligase (AMP-forming)[p]	m00752[p] + m01371[p] + m01597[p] --> m00616[p] + m01334[p] + m02759[p]	79111 or 65192			Bile acid metabolism	0	0	1000	0	1	6.2.1.7
RCR10915	3alpha,7alpha,12alpha-trihydroxy-5beta-cholestan-26-oyl-CoA 25-epimerase	m00616[p] --> m00618[p]	25284			Bile acid metabolism	0	0	1000	0	1	5.1.99.4		PMID:11864182;PMID:11060344;PMID:10709654
RCR10916	fatty acyl-CoA oxidase	m00618[p] + m01803[p] + m02630[p] --> m00749[p] + m01802[p] + 2 m02040[p]	50681 or 83522			Bile acid metabolism	0	0	1000	0	1	1.3.3.6;1.17.99.-
RCR10917	acyl coenzyme A oxidase	m00618[p] + m02630[p] --> m00749[p] + m02041[p]	50681 or 83522			Bile acid metabolism	0	0	1000	0	1	1.3.3.6;1.17.99.-		PMID:11356170;PMID:8943006
RCR10918	(24R,25R)-3alpha,7alpha,12alpha,24-tetrahydroxy-5beta-cholestanoyl-CoA hydro-lyase	m00749[p] + m02040[p] --> m00036[p]	171142 and 79244 and 24157			Bile acid metabolism	0	0	1000	0	1	4.2.1.107		PMID:8902629
RCR10919	Choloyl-CoA:glycine N-choloyltransferase[p]	m01514[p] + m02961[p] --> m02963[p] + m01597[p]	29725			Bile acid metabolism	0	0	1000	0	1	2.3.1.65		PMID:10884298;PMID:12239217;PMID:12543708;PMID:15026425;PMID:3741411;PMID:6884990
RCR10920	3alpha,7alpha-Dihydroxy-5beta-cholestane:NAD+ oxidoreductase (B-specific)	m01181[c] + m02553[c] + m02039[c] --> m01095[c] + m02552[c]	191574			Bile acid metabolism	0	0	1000	0	1	1.1.1.50		PMID:1554355;PMID:1591235;PMID:3459552;PMID12943710;PMID7998972
RCR10921	cholestanetriol 26-monooxygenase[m]	m01095[m] + m02555[m] + m02630[m] + m02039[m] --> m01093[m] + m02554[m] + m02040[m]	301517			Bile acid metabolism	0	0	1000	0	1	1.14.13.15		PMID:1708392;PMID:2019602;PMID:9660774
RCR10922	3alpha,7alpha-dihydroxy-5beta-cholanoyl-CoA:taurine N-choloyltransferase	m01434[p] + m02961[p] --> m02962[p] + m01597[p]	29725			Bile acid metabolism	0	0	1000	0	1	2.3.1.65		PMID:12810727;PMID:6884990;PMID11980911
RCR10923	cholest-5-ene-3beta,7alpha-diol 3beta-dehydrogenase	m01448[c] + m02552[c] --> m00979[c] + m02553[c] + m02039[c]	246211			Bile acid metabolism	0	0	1000	0	1	1.1.1.181		PMID:12679481;PMID:11067870
RCR10924	cholesterol 26-hydroxylase	m01450[m] + m02555[m] + m02630[m] + m02039[m] --> m00623[m] + m02554[m] + m02040[m]	309527			Bile acid metabolism	0	0	1000	0	1	1.14.99.38		PMID:9852097
RCR10925	5beta-Cholestane-3alpha,7alpha,12alpha-triol,NADPH:oxygen oxidoreductase (26-hydroxylating)[m]	m01078[m] + m02555[m] + m02630[m] + m02039[m] <==> m01092[m] + m02554[m] + m02040[m]	25086 or 301517			Bile acid metabolism	1	-1000	1000	0	1	1.14.13.-		PMID:9660774;PMID:9210654
RCR10926	UDP-GlcNAc:betaGal beta-1,3-N-acetylglucosaminyltransferase 5	m02328[g] + m03111[g] --> m02346[g] + m03106[g]	116740			Glycan metabolism	0	0	1000	0	1	2.4.1.206
RCR10927	Beta galactosyltransferase	m02346[g] + m03107[g] --> m02347[g] + m03106[g]	288161			Glycan metabolism	0	0	1000	0	1	2.4.1.-
RCR10928	NADH:ferricytochrome-b5 oxidoreductase	2 m01823[c] + m02553[c] + m02039[c] <==> 2 m01825[c] + m02552[c]	365345 or 304805 or 171015 or 25035 or 689035			Vitamin B metabolism	1	-1000	1000	0	1	1.6.2.2		PMID:2500149;PMID:6841358;PMID:7294831;PMID:8143727
RCR10929	3-Hydroxyanthranilate:oxygen 3,4-oxidoreductase (decyclizing)	m00775[c] + m02630[c] --> m00629[c]	56823			Vitamin B metabolism	0	0	1000	0	1	1.13.11.6		PMID:12007609
RCR10930	Deamido-NAD+:L-glutamine amido-ligase (AMP-forming)	m01646[c] + m01975[c] + m01371[c] + m02040[c] --> m01974[c] + m01334[c] + m02759[c] + m02552[c]	353255			Vitamin B metabolism	0	0	1000	0	1	6.3.5.1		PMID:11947665;PMID:12547821;PMID:2107886
RCR10931	deamido-NAD+:ammonia ligase (AMP-forming)	m01646[c] + m02578[c] + m01371[c] --> m01334[c] + m02759[c] + m02552[c]	353255			Vitamin B metabolism	0	0	1000	0	1	6.3.5.1
RCR10932	nicotinamide-nucleotide adenylyltransferase	m02581[n] + m01371[n] + m02039[n] --> m02759[n] + m02552[n]	298653			Vitamin B metabolism	0	0	1000	0	1	2.7.7.1		PMID11027696;PMID11248244;PMID12574164
RCR10933	purine-nucleoside phosphorylase	m02844[c] + m02583[c] + m02039[c] <==> m02582[c] + m02751[c]	290029			Vitamin B metabolism	1	-1000	1000	0	1	2.4.2.1		PMID14704851;PMID9030766
RCR10934	N-[(R)-4'-Phosphopantothenoyl]-L-cysteine carboxy-lyase	m00163[c] --> m02741[c] + m01596[c]	363069			Vitamin B metabolism	0	0	1000	0	1	4.1.1.36		PMID:11923312;PMID:13630913;PMID:15893380;PMID:4459135;PMID:6061681
RCR10935	ATP:1-phosphatidyl-1D-myo-inositol 3-phosphotransferase[c]	m02750[c] + m01371[c] --> m00552[c] + m01285[c]	65052			Inositol phosphate metabolism	0	0	1000	0	1	2.7.1.137
RCR10936	1-Phosphatidyl-1D-myo-inositol 3-phosphate 3-phosphohydrolase[c]	m00552[c] + m02040[c] --> m02750[c] + m02751[c]	288762 or 310155			Inositol phosphate metabolism	0	0	1000	0	1	3.1.3.64		PMID:7556092;PMID7556092
RCR10937	ATP:1-phosphatidyl-1D-myo-inositol-3-phosphate 5-phosphotransferase	m00552[c] + m01371[c] --> m00555[c] + m01285[c]	316457			Inositol phosphate metabolism	0	0	1000	0	1	2.7.1.150		PMID:9211928;PMID:10231032;PMID:11493657;PMID:10358929
RCR10938	D-Fructose 2-phosphate phosphatase	m00555[c] + m02040[c] --> m00552[c] + m02751[c]	311368 or 116482 or 297412 or 315422 or 296635 or 296571 or 296588 or 65038 or 619549 or 287368 or 290230 or 305935 or 312634 or 315326 or 317296 or 503446 or 301543 or 81536 or 291022 or 100360582 or 309855 or 306490 or 309008 or 310812 or 691922 or 360417 or 100911499			Inositol phosphate metabolism	0	0	1000	0	1	3.1.3.-
RCR10939	ATP:1-Phosphatidyl-1D-myo-inositol 4-phosphotransferase[c]	m02750[c] + m01371[c] --> m00553[c] + m01285[c]	114554 or 81747 or 305419 or 64161			Inositol phosphate metabolism	0	0	1000	0	1	2.7.1.67		PMID:7556092
RCR10940	1-phosphatidylinositol 4-kinase	m00553[c] + m02040[c] --> m02750[c] + m02751[c]				Inositol phosphate metabolism	0	0	1000	0	1	3.1.3.-		PMID:7556092;PMID2425833
RCR10941	1-phosphatidyl-1D-myo-inositol-3,4-bisphosphate 4-phosphohydrolase[c]	m00551[c] + m02040[c] --> m00552[c] + m02751[c]	116699 or 80849			Inositol phosphate metabolism	0	0	1000	0	1	3.1.3.66
RCR10942	1-Phosphatidyl-1D-myo-inositol 3,4-bisphosphate 3-phosphohydrolase[c]	m00551[c] + m02040[c] --> m00553[c] + m02751[c]	50557 or 364629			Inositol phosphate metabolism	0	0	1000	0	1	3.1.3.67
RCR10943	Phosphatidyl-myo-inositol-4,5-bisphosphate 4-phosphohydrolase	m02736[c] + m02040[c] --> m00553[c] + m02751[c]	84018 or 85238 or 317576 or 362590 or 114089			Inositol phosphate metabolism	0	0	1000	0	1	3.1.3.36		PMID10764818;PMID12915445;PMID7721860;PMID7761412
RCR10944	1-phosphatidyl-1D-myo-inositol-4,5-bisphosphate 4-phosphohydrolase	m02736[c] + m02040[c] --> m00554[c] + m02751[c]	364298 or 362490			Inositol phosphate metabolism	0	0	1000	0	1	3.1.3.78		PMID10358929
RCR10945	Phosphatidylinositol-3,4,5-trisphosphate 3-phosphohydrolase	m02734[c] + m02040[c] --> m02736[c] + m02751[c]	50557 or 364629			Inositol phosphate metabolism	0	0	1000	0	1	3.1.3.67		PMID11463863
RCR10946	1-phosphatidyl-1D-myo-inositol-3,4,5-trisphosphate 5-phosphohydrolase[c]	m02734[c] + m02040[c] --> m00551[c] + m02751[c]	311368 or 116482 or 297412 or 315422 or 296635 or 296571 or 296588 or 65038 or 619549 or 287368 or 290230 or 305935 or 312634 or 315326 or 317296 or 503446 or 301543 or 81536 or 291022 or 100360582 or 309855 or 306490 or 309008 or 310812 or 691922 or 360417 or 100911499			Inositol phosphate metabolism	0	0	1000	0	1	3.1.3.-		PMID:7556092;PMID10358929
RCR10947	1-Phosphatidyl-1D-myo-inositol-4,5-bisphosphate inositoltrisphosphohydrolase	m02736[c] + m02040[c] --> m01718[c] + m00240[c]	25738 or 140693 or 24655 or 287745 or 24654 or 25031 or 29322 or 85240 or 29337 or 114633 or 497197			Inositol phosphate metabolism	0	0	1000	0	1	3.1.4.11
RCR10948	D-myo-Inositol-1,4,5-trisphosphate 5-phosphohydrolase	m01718[c] + m02040[c] --> m00526[c] + m02751[c]	171088 or 365382 or 287533			Inositol phosphate metabolism	0	0	1000	0	1	3.1.3.56		PMID10593988;PMID10764818;PMID15261714;PMID2906139;PMID7721860;PMID8006039;PMID8013665;PMID8530088;PMID8769125;PMID9428629;PMID9824312
RCR10949	ATP:1D-myo-inositol-1,4,5-trisphosphate 3-phosphotransferase	m01718[c] + m01371[c] --> m00522[c] + m01285[c]	308451 or 81677 or 54260			Inositol phosphate metabolism	0	0	1000	0	1	2.7.1.127
RCR10950	D-myo-Inositol 1,3,4,5-tetrakisphosphate 3-phosphohydrolase	m00522[c] + m02040[c] --> m01718[c] + m02751[c]	29688 or 499084			Inositol phosphate metabolism	0	0	1000	0	1	3.1.3.62
RCR10951	D-myo-Inositol 1,3,4,5-tetrakisphosphate 5-phosphohydrolase	m00522[c] + m02040[c] --> m00524[c] + m02751[c]	171088 or 54259 or 365382 or 287533			Inositol phosphate metabolism	0	0	1000	0	1	3.1.3.56;3.1.3.86		PMID10593988;PMID10764818;PMID15261714;PMID2906139;PMID7721860;PMID8006039;PMID8013665;PMID8530088;PMID8769125;PMID9428629;PMID9824312
RCR10952	ATP:1D-myo-inositol-1,3,4-trisphosphate 6-phosphotransferase	m00524[c] + m01371[c] --> m00523[c] + m01285[c]	500709			Inositol phosphate metabolism	0	0	1000	0	1	2.7.1.159
RCR10953	ATP:1D-myo-inositol-1,3,4,6-tetrakisphosphate 5-phosphotransferase	m00523[c] + m01371[c] --> m00521[c] + m01285[c]	171458			Inositol phosphate metabolism	0	0	1000	0	1	2.7.1.140
RCR10954	1D-myo-inositol-3-phosphate lyase (isomerizing)	m01968[c] --> m00529[c]	290651			Inositol phosphate metabolism	0	0	1000	0	1	5.5.1.4
RCR10955	diphosphoinositide kinase	m02750[c] + m01371[c] --> m00554[c] + m01285[c]	314641 or 309419 or 365865 or 687758			Inositol phosphate metabolism	0	0	1000	0	1	2.7.1.68		PMID:9211928;PMID:10231032;PMID:11493657;PMID:10358929
RCR10956	phosphatidylinositol-3,4,5-trisphosphate 3-phosphatase[c]	m00554[c] + m02040[c] --> m02750[c] + m02751[c]	50557 or 364629			Inositol phosphate metabolism	0	0	1000	0	1	3.1.3.67		PMID:7556092;PMID:9367831
RCR10957	phosphatidylinositol-3,4,5-trisphosphate 3-phosphatase[g]	m00554[g] + m02040[g] --> m02750[g] + m02751[g]	50557 or 364629			Inositol phosphate metabolism	0	0	1000	0	1	3.1.3.67		PMID:7556092;PMID:9367831
RCR10958	phosphatidylinositol 3-kinase	m00554[c] + m01371[c] --> m00555[c] + m01285[c]	65052			Inositol phosphate metabolism	0	0	1000	0	1	2.7.1.137		PMID:9211928;PMID:9043658;PMID:11493657;PMID:10358929
RCR10959	ATP:1D-myo-inositol-5-diphosphate-pentakisphosphate phosphotransferase	m01133[c] + m01371[c] --> m00531[c] + m01285[c]	311355 or 501194			Inositol phosphate metabolism	0	0	1000	0	1	2.7.4.24
RCR10960	inositol-1,3,4-trisphosphate 4-phosphatase	m00524[c] + m02040[c] --> m02172[c] + m02751[c]				Inositol phosphate metabolism	0	0	1000	0	1			PMID2906139
RCR10961	diphosphoinositol-1,3,4,6-tetrakisphosphate diphosphohydrolase	m00531[c] + 2 m02040[c] --> m00521[c] + m02759[c] + m02751[c]	50560 or 59268 or 311355 or 688862 or 501194			Inositol phosphate metabolism	0	0	1000	0	1	2.7.4.21
RCR10962	glycine synthase	m02980[m] + m01986[m] + m02552[m] --> m01045[m] + m02578[m] + m01596[m] + m02553[m] + m02039[m]	309312 and 298942 and 306586 and 171133			Vitamin B metabolism	0	0	1000	0	1	1.8.1.4;2.1.2.10		PMID:7916605
RCR10963	Formate:tetrahydrofolate ligase (ADP-forming)	m02980[m] + m01833[m] + m01371[m] --> m00266[m] + m02751[m] + m01285[m]	305248 or 361472 or 680308			Vitamin B metabolism	0	0	1000	0	1	3.5.4.9;6.3.4.3		PMID:12024029;PMID:16171773;PMID:3053686;PMID12937168
RCR10964	5,10-Methenyltetrahydrofolate 5-hydrolase (decyclizing)[m]	m00266[m] + m02039[m] <==> m01044[m] + m02040[m]	305248 or 361472 or 680308			Vitamin B metabolism	1	-1000	1000	0	1	3.5.4.9		PMID:12937168;PMID:16171773;PMID:3053686;PMID12937168
RCR10965	10-Formyltetrahydrofolate:L-glutamate ligase (ADP-forming)	m00266[c] + 4 m01974[c] + 4 m01371[c] --> m00267[c] + 4 m02751[c] + 4 m01285[c]	687266			Vitamin B metabolism	0	0	1000	0	1	6.3.2.17
RCR10966	folylpolyglutamate synthetase (10fthf)	m00267[c] + m01974[c] + m01371[c] --> m00268[c] + m02751[c] + m01285[c]	687266			Vitamin B metabolism	0	0	1000	0	1	6.3.2.17
RCR10967	folylpolyglutamate synthetase, mitochondrial	m00268[c] + m01974[c] + m01371[c] --> m00269[c] + m02751[c] + m01285[c]	687266			Vitamin B metabolism	0	0	1000	0	1	6.3.2.17
RCR10968	gamma-glutamyl hydrolase	m00268[l] + m02040[l] --> m00267[l] + m01974[l]	25455			Vitamin B metabolism	0	0	1000	0	1	3.4.19.9
RCR10969	folylpolyglutamate synthetase (DHF)	m02691[c] + m01974[c] + m01371[c] --> m02118[c] + m02751[c] + m01285[c]	687266			Vitamin B metabolism	0	0	1000	0	1	6.3.2.17
RCR10970	folylpolyglutamate synthetase	m02692[c] + m01974[c] + m01371[c] --> m02119[c] + m02751[c] + m01285[c]	687266			Vitamin B metabolism	0	0	1000	0	1	6.3.2.17
RCR10971	tetrahydropteroyl-poly-gamma-glutamate gamma-glutamylhydrolase	m02692[l] + 4 m02040[l] --> m02980[l] + 4 m01974[l]	25455			Vitamin B metabolism	0	0	1000	0	1	3.4.19.9
RCR10972	gamma-glutamyl hydrolase[l]	m02119[l] + m02040[l] --> m02692[l] + m01974[l]	25455			Vitamin B metabolism	0	0	1000	0	1	3.4.19.9
RCR10973	5-Formyltetrahydrofolate cyclo-ligase (ADP-forming)	m01100[c] + m01371[c] + m02039[c] --> m01044[c] + m02751[c] + m01285[c]	300886			Vitamin B metabolism	0	0	1000	0	1	6.3.3.2
RCR10974	N6-D-Biotinyl-L-lysine amidohydrolase	m01400[c] + m02040[c] --> m01401[c] + m02426[c]	306262			Vitamin B metabolism	0	0	1000	0	1	3.5.1.12
RCR10975	2-amino-4-hydroxy-6-(erythro-1,2,3-trihydroxypropyl) dihydropteridine triphosphate lyase	m01155[c] --> m01170[c] + m03057[c]	29498			Aromatic amino acid metabolism	0	0	1000	0	1	4.2.3.12		PMID:7493990;PMID10727395
RCR10976	4a-hydroxytetrahydrobiopterin dehydratase	m00965[n] <==> m02632[n] + m02040[n]	29700 or 685729			Aromatic amino acid metabolism	1	-1000	1000	0	1	4.2.1.96		PMID:10727395;PMID:8921004
RCR10977	glutathione:dehydroascorbate oxidoreductase	m01655[c] + 2 m02026[c] --> m02027[c] + m01368[c]				Vitamin C metabolism	0	0	1000	0	1
RCR10978	L-Dehydroascorbate lactonohydrolase	m01655[c] + m02040[c] --> m00573[c]				Vitamin C metabolism	0	0	1000	0	1
RCR10979	2,3-dioxo-L-gulonate:hydrogen peroxide oxireductase[c]	m00573[c] + m02040[c] --> m02406[c] + m01596[c]				Vitamin C metabolism	0	0	1000	0	1			PMID9296457
RCR10980	Uroporphyrinogen-III carboxy-lyase	m03128[c] --> m01606[c] + 4 m01596[c]	29421			Porphyrin metabolism	0	0	1000	0	1	4.1.1.37
RCR10981	protoporphyrinogen-IX:oxygen oxidoreductase	m02804[m] + 3 m02630[m] --> m02803[m] + 3 m02041[m]	289219			Porphyrin metabolism	0	0	1000	0	1	1.3.3.4		PMID:14535846;PMID:16621625;PMID:9578577
RCR10982	Bilirubin:NAD+ oxidoreductase	m01399[c] + m02553[c] + m02039[c] --> m01396[c] + m02552[c]	116599 or 292737			Porphyrin metabolism	0	0	1000	0	1	1.3.1.24
RCR10983	Uroporphyrinogen I carboxy-lyase	m03127[c] --> m01605[c] + 4 m01596[c]	29421			Porphyrin metabolism	0	0	1000	0	1	4.1.1.37		PMID:17360334;UNIPROT:P06132
RCR10984	phosphatidylcholine:retinol O-acyltransferase	m02834[c] + m02684[c] --> m00535[c] + m02838[c]	64047 or 252900 or 84497 or 24710 or 25056 or 302425 or 679520			Vitamin A metabolism	0	0	1000	0	1	2.3.1.135;2.3.1.75
RCR10985	11-cis-retinol:NAD+ oxidoreductase	m00290[c] + m02553[c] + m02039[c] <==> m00291[c] + m02552[c]	266686 or 286964 or 366791 or 299511 or 297805 or 24711 or 293049 or 360420 or 100362350			Vitamin A metabolism	1	-1000	1000	0	1	1.1.1.105
RCR10986	retinol isomerase	m02834[c] --> m01232[c]	24710 or 25056			Vitamin A metabolism	0	0	1000	0	1		spontaneous
RCR10987	9-cis-retinol:NAD+ oxidoreductase	m01230[c] + m02553[c] + m02039[c] <==> m01232[c] + m02552[c]	266686 or 286964 or 366791 or 299511 or 297805 or 24711 or 293049 or 360420 or 100362350			Vitamin A metabolism	1	-1000	1000	0	1	1.1.1.105
RCR10988	retinol isomerase[r]	m02832[r] --> m01230[r]	24710 or 25056			Vitamin A metabolism	0	0	1000	0	1		spontaneous	PMID:9647871
RCR10989	all-trans-Retinal 11-cis-trans-isomerase	m02832[c] --> m00290[c]	24710 or 25056			Vitamin A metabolism	0	0	1000	0	1
RCR10990	glucuronosyltransferase	m00350[c] + m03109[c] --> m00353[c] + m03106[c]	24861 or 301595			Vitamin A metabolism	0	0	1000	0	1	2.4.1.17		PMID:10702251
RCR10991	retinal isomerase (9-cis)	m01230[c] <==> m02832[c]				Vitamin A metabolism	1	-1000	1000	0	1
RCR10992	4-oxo-retinoic acid formation (oxidation)	2 m02833[c] + m02630[c] --> 2 m01026[c] + 4 m02039[c]				Vitamin A metabolism	0	0	1000	0	1
RCR10993	melatonin:oxygen 2,3-dioxygenase (indole-decyclizing)	m02460[c] + m02630[c] --> m01839[c]	66029 or 681319			Serotonin and melatonin biosynthesis	0	0	1000	0	1	1.13.11.52		PMID:12044950;PMID4814344
RCR10994	5-Hydroxyindoleacetaldehyde:NAD+ oxidoreductase	m01102[c] + m02552[c] + m02040[c] --> m01103[c] + m02553[c] + m02039[c]	291450 or 29539 or 64040 or 65183 or 298079			Serotonin and melatonin biosynthesis	0	0	1000	0	1	1.2.1.3		PMID:8155713;PMID:8605195;PMID8155713;PMID8605195
RCR10995	5-hydroxyindoleacetaldehyde:oxygen oxidoreductase	m01102[c] + m02630[c] + m02040[c] --> m01103[c] + m02041[c]	316421 or 316424 or 493909 or 54349			Serotonin and melatonin biosynthesis	0	0	1000	0	1	1.2.3.1		PMID:11569919;PMID:16143537;PMID20038499
RCR10996	CYP24A1	m00620[m] + m02555[m] + m02630[m] + m02039[m] --> m00613[m] + m02554[m] + m02040[m]	25279			Vitamin D metabolism	0	0	1000	0	1	1.14.13.126		PMID15358094;PMID8266831
RCR10997	3-hydroxyacyl-CoA dehydrogenase	m01097[m] + m02552[m] + m02630[m] + m01371[m] + m01597[m] + m02039[m] + m02040[m] --> m01923[m] + m02774[m] + m02041[m] + m01334[m] + m02759[m] + m02553[m]				Vitamin E metabolism	0	0	1000	0	1	1.1.1.35;1.3.3.6;2.3.1.154;2.3.1.16;3.1.2.2;4.2.1.17;5.1.99.4;6.2.1.-
RCR10998	naphthalene epoxide isomerase	m00032[c] --> m00538[c]				Xenobiotics metabolism	0	0	1000	0	1	spontaneous	spontaneous
RCR10999	naphthalene epoxide isomerase[c]	m00032[c] --> m00668[c]				Xenobiotics metabolism	0	0	1000	0	1	spontaneous	spontaneous
RCR11000	RCR11000[c]	m00034[c] --> m00538[c]				Xenobiotics metabolism	0	0	1000	0	1	spontaneous	spontaneous
RCR11001	RCR11001[c]	m00034[c] --> m00668[c]				Xenobiotics metabolism	0	0	1000	0	1	spontaneous	spontaneous
RCR11002	trichloroethanol:NAD+ oxidoreductase	m01440[c] + m02553[c] + m02039[c] --> m03043[c] + m02552[c] + m02040[c]	100145871 or 171178 or 362474 or 310903 or 29646 or 24172			Xenobiotics metabolism	0	0	1000	0	1	1.1.1.1
RCR11003	UDP-glucuronate beta-D-glucuronosyltransferase	m03043[c] + m03109[c] --> m03042[c] + m03106[c]				Xenobiotics metabolism	0	0	1000	0	1	2.4.1.17
RCR11004	RCR11004[c]	m00932[c] --> m00927[c]				Xenobiotics metabolism	0	0	1000	0	1
RCR11005	glucuronosyltransferase[c]	m00929[c] + m03109[c] --> m02607[c] + m03106[c]				Xenobiotics metabolism	0	0	1000	0	1	2.4.1.17
RCR11006	chloroacetyl-chloride:glutathione S-chloroacetyltransferase	m01444[c] + m02026[c] --> m02854[c] + m02144[c]				Xenobiotics metabolism	0	0	1000	0	1	2.5.1.18
RCR11007	hydrogen-peroxide:hydrogen-peroxide oxidoreductase[p]	2 m02041[p] --> m02630[p] + 2 m02040[p]	24248			Miscellaneous	0	0	0	0	1	1.11.1.6	problematic	PMID:12054464;PMID:1657986;PMID18634816;PMID18634817
RCR11008	Triphosphate phosphohydrolase	m03057[c] + m02040[c] --> m02759[c] + m02751[c]				Miscellaneous	0	0	1000	0	1	3.6.1.25		PMID:11278456
RCR11009	L-arginyl-tRNA(Arg):protein arginyltransferase	m02339[c] + m03064[c] <==> m00196[c] + m02340[c]	293526			Miscellaneous	1	-1000	1000	0	1	2.3.2.8
RCR11010	ATP:protamine O-phosphotransferase	m02801[c] + m01371[c] --> m02656[c] + m01285[c]				Miscellaneous	0	0	1000	0	1	2.7.11.1
RCR11011	RCR11011[c]	0.2781 m00496[c] + 0.2479 m00491[c] + 0.1271 m00499[c] + 0.1143 m00495[c] + 0.0709 m00472[c] + 0.0271 m00474[c] + 0.0252 m00450[c] + 0.0228 m00476[c] + 0.0178 m00464[c] + 0.0109 m00452[c] + 0.0105 m00461[c] + 0.0056 m00459[c] + 0.0054 m00493[c] + 0.0047 m00492[c] + 0.0039 m00451[c] + 0.0036 m00479[c] + 0.0026 m00457[c] + 0.0011 m00460[c] + 5e-04 m00436[c] + 5e-04 m00437[c] + 5e-04 m00438[c] + 5e-…				Biomass	0	0	1000	0	1			PMID:16137923
RCR11012	RCR11012[c]	0.2125 m00472[c] + 0.1983 m00499[c] + 0.1312 m00491[c] + 0.1243 m00496[c] + 0.0619 m00495[c] + 0.0459 m00450[c] + 0.0411 m00476[c] + 0.0327 m00461[c] + 0.0319 m00493[c] + 0.0285 m00474[c] + 0.0221 m00452[c] + 0.0166 m00492[c] + 0.0163 m00464[c] + 0.0067 m00459[c] + 0.0052 m00451[c] + 0.0025 m00457[c] + 0.0011 m00479[c] + 7e-04 m00460[c] + 5e-04 m00436[c] + 5e-04 m00437[c] + 5e-04 m00438[c] + 5e-0…				Biomass	0	0	1000	0	1			PMID:16137923
RCR11013	RCR11013[c]	0.4731 m00499[c] + 0.2005 m00472[c] + 0.0931 m00450[c] + 0.0337 m00496[c] + 0.0329 m00459[c] + 0.0323 m00495[c] + 0.0286 m00452[c] + 0.0177 m00491[c] + 0.0174 m00464[c] + 0.0131 m00474[c] + 0.0089 m00476[c] + 0.0058 m00461[c] + 0.0055 m00451[c] + 0.0055 m00493[c] + 0.0043 m00460[c] + 0.0035 m00492[c] + 0.0025 m00457[c] + 0.0011 m00479[c] + 5e-04 m00436[c] + 5e-04 m00437[c] + 5e-04 m00438[c] + 5e-…				Biomass	0	0	1000	0	1			PMID:16137923
RCR11014	RCR11014[c]	0.3553 m00499[c] + 0.2118 m00472[c] + 0.136 m00495[c] + 0.0678 m00491[c] + 0.0678 m00496[c] + 0.0269 m00450[c] + 0.0266 m00474[c] + 0.0228 m00476[c] + 0.0179 m00464[c] + 0.0124 m00451[c] + 0.0101 m00459[c] + 0.0056 m00493[c] + 0.0053 m00461[c] + 0.0043 m00452[c] + 0.0031 m00460[c] + 0.0027 m00457[c] + 0.0019 m00492[c] + 0.0012 m00479[c] + 5e-04 m00436[c] + 5e-04 m00437[c] + 5e-04 m00438[c] + 5e-0…				Biomass	0	0	1000	0	1			PMID:16137923
RCR11015	RCR11015[c]	0.557 m00496[c] + 0.138 m00499[c] + 0.061 m00495[c] + 0.0453 m00474[c] + 0.0358 m00461[c] + 0.025 m00491[c] + 0.0136 m00472[c] + 0.011 m00493[c] + 0.0075 m00492[c] + 0.0068 m00452[c] + 0.003 m00450[c] + 0.002 m00436[c] + 0.002 m00437[c] + 0.002 m00438[c] + 0.002 m00439[c] + 0.002 m00440[c] + 0.002 m00441[c] + 0.002 m00442[c] + 0.002 m00443[c] + 0.002 m00444[c] + 0.002 m00445[c] + 0.002 m00446[c] …				Biomass	0	0	1000	0	1			PMID:16137923
RCR11016	3'-phosphoadenylyl-sulfate:cholesterol sulfotransferase	m02682[c] + m01450[c] --> m01512[c] + m02681[c]	292915			Miscellaneous	0	0	1000	0	1	2.8.2.2
RCR11017	ATP phosphohydrolase	m01371[c] + m02040[c] --> m02751[c] + m01285[c]				Biomass	0	0	1000	1	1
RCR11018	ethanol:NAD+ oxidoreductase	m01796[c] + m02552[c] --> m01249[c] + m02553[c] + m02039[c]	100145871 or 171178 or 362474 or 310903 or 29646 or 24172 or 291403			Central carbon metabolism	0	0	1000	0	1	1.1.1.1;1.1.1.71		PMID:10868354;PMID:12491384;PMID:12818203;PMID:14674758;PMID:15289102;PMID:15299346;PMID:15327949;PMID:15682493;PMID:15713978;PMID11762128;PMID12592711
RCR11019	Ethanol:NADP+ oxidoreductase	m01796[c] + m02554[c] --> m01249[c] + m02555[c] + m02039[c]	78959			Central carbon metabolism	0	0	1000	0	1	1.1.1.2		PMID11003211;PMID14576493;PMID19382904;PMID19382905
RCR11020	acetyl adenylate:CoA acetyltransferase	m01257[c] + m01597[c] --> m01261[c] + m01334[c]	311569			Central carbon metabolism	0	0	1000	0	1	6.2.1.1		PMID:10843999;PMID:14086739;PMID:238571;PMID:2901103
RCR11021	ATP:acetate adenylyltransferase	m01252[c] + m01371[c] --> m01257[c] + m02759[c]	311569			Central carbon metabolism	0	0	1000	0	1	6.2.1.1		PMID:10843999;PMID:14086739;PMID:238571;PMID:2901103
RCR11022	Acetaldehyde:NADP+ oxidoreductase	m01249[c] + m02554[c] + m02040[c] --> m01252[c] + m02555[c] + m02039[c]	25375 or 266603 or 309147 or 688778			Central carbon metabolism	0	0	1000	0	1	1.2.1.5		PMID:16411662;PMID:2060039;PMID:7779080;PMID:8155713;PMID:8605195;PMID:9228057;PMID12616643
RCR11023	Acetaldehyde:NAD+ oxidoreductase[m]	m01249[m] + m02552[m] + m02040[m] --> m01252[m] + m02553[m] + m02039[m]	291450 or 29539 or 64040 or 65183 or 298079			Central carbon metabolism	0	0	1000	0	1	1.2.1.3		PMID18983992;PMID18983993;PMID19382904;PMID19382905
RCR11024	2-Oxopropanal:NADP+ oxidoreductase	m02475[c] + m02554[c] + m02040[c] --> m02819[c] + m02555[c] + m02039[c]	291403			Central carbon metabolism	0	0	1000	0	1	1.2.1.49		PMID:20958;PMID:4383524;PMID:4391087;PMID:6014;PMID:7107625;PMID:7107626;PMID:7144586;PMID:7763257;PMID:7993370;PMID20958;PMID4383524;PMID4391087;PMID6014;PMID7107625;PMID7107626;PMID7144586;PMID7763257;PMID7993370
RCR11025	3-phospho-D-glycerate 1,2-phosphomutase	m00247[c] --> m00569[c]	24959 or 24642 or 296973			Central carbon metabolism	0	0	1000	0	1	5.4.2.1;5.4.2.4
RCR11026	2,3-bisphospho-D-glycerate 2-phosphohydrolase	m00569[c] + m02040[c] --> m00913[c] + m02751[c]	296973			Central carbon metabolism	0	0	1000	0	1	3.1.3.13		PMID15949708;PMID17052986
RCR11027	D-glyceraldehyde-3-phosphate:NAD+ oxidoreductase (phosphorylating)	m00247[c] + m02553[c] + m02039[c] <==> m01939[c] + m02552[c] + m02751[c]	24383 or 66020			Central carbon metabolism	1	-1000	1000	0	1	1.2.1.12		PMID:12027953;PMID:14993695;PMID:3370218;PMID:7144574;PMID10714828
RCR11028	D-Glucose-6-phosphate phosphohydrolase	m01968[r] + m02040[r] --> m01965[r] + m02751[r]	25634 or 303565 or 681817			Central carbon metabolism	0	0	1000	0	1	3.1.3.9		PMID:12101013;PMID:12485600;PMID:1662952;PMID:6291517;PMID:6321405;PMID:6935637
RCR11029	calcium / sodium antiporter (1:3), reversible	m01796[p] + m02041[p] --> m01249[p] + 2 m02040[p]	24248			Central carbon metabolism	0	0	0	0	1	1.11.1.6	problematic	PMID19382904;PMID19382905;PMID8769411
RCR11030	carbamoyl-phosphate synthase (glutamine-hydrolysing)	m01420[r] + m01965[r] --> m01968[r] + m02578[r] + m01596[r]	25634 or 303565 or 681817			Central carbon metabolism	0	0	1000	0	1	3.1.3.9
RCR11031	ethanol reversible peroxisomal transport	m01796[c] + m02555[c] + m02630[c] + m02039[c] --> m01249[c] + m02554[c] + 2 m02040[c]	25086			Central carbon metabolism	0	0	1000	0	1			PMID10620320;PMID17084996;PMID17084997
RCR11032	1,4-alpha-glucan branching enzyme (glygn1 -> glygn2)	m01990[c] --> m01992[c]	288333			Central carbon metabolism	0	0	1000	0	1	2.4.1.18		PMID:12133002;PMID:4475632;PMID:5810070;UNIPROT:Q15125;PMID8463281
RCR11033	glycogen phosphorylase (glygn2 -> dxtrn)	m01992[c] + 3 m02751[c] --> m01991[c] + 3 m01967[c]	25739 or 64035 or 24701			Central carbon metabolism	0	0	1000	0	1	2.4.1.1		PMID:12133002;PMID:4475632;PMID:5810070;UNIPROT:Q15125;PMID3346228
RCR11034	4-alpha-glucanotransferase	m01991[c] --> m01994[c]	362029			Central carbon metabolism	0	0	1000	0	1	2.4.1.25		PMID:12133002;PMID:4475632;PMID:5810070;UNIPROT:Q15125
RCR11035	amylo-alpha-1,6-glucosidase	m01994[c] + m02040[c] --> m01993[c] + m01965[c]	362029			Central carbon metabolism	0	0	1000	0	1	3.2.1.33		PMID:12133002;PMID:4475632;PMID:5810070;UNIPROT:Q15125
RCR11036	glycogen phosphorylase	m01993[c] + 7 m02751[c] --> m01996[c] + 7 m01967[c]	25739 or 64035 or 24701			Central carbon metabolism	0	0	1000	0	1	2.4.1.1		PMID:12133002;PMID:4475632;PMID:5810070;UNIPROT:Q15125;PMID12133002;PMID4475632;PMID5810070
RCR11037	alpha-amylase[c]	m02445[c] + m02040[c] --> m02448[c] + m01840[c]	364745 or 497039 or 24203			Central carbon metabolism	0	0	1000	0	1	3.2.1.1
RCR11038	glycogenase	m02448[c] + 2 m02040[c] --> m02446[c] + 2 m01840[c]	364745 or 497039 or 24203			Central carbon metabolism	0	0	1000	0	1	3.2.1.1
RCR11039	alpha amylase, alpha-amylase	m02446[c] + m02040[c] --> m02447[c] + m01840[c]	364745 or 497039 or 24203			Central carbon metabolism	0	0	1000	0	1	3.2.1.1
RCR11040	endoamylase	m02447[c] + m02040[c] --> m02449[c] + m01840[c]	364745 or 497039 or 24203			Central carbon metabolism	0	0	1000	0	1	3.2.1.1
RCR11041	Taka-amylase A	m02449[c] + m02040[c] --> m02451[c] + m01840[c]	364745 or 497039 or 24203			Central carbon metabolism	0	0	1000	0	1	3.2.1.1
RCR11042	1,4-alpha-D-glucan glucanohydrolase	m02451[c] + m02040[c] --> m02452[c] + m01840[c]	364745 or 497039 or 24203			Central carbon metabolism	0	0	1000	0	1	3.2.1.1
RCR11043	Maltodextrin glucosidase (maltotriose)	m02452[c] + m02040[c] --> m02450[c] + m01965[c]	24382 or 312272			Central carbon metabolism	0	0	1000	0	1	3.2.1.20
RCR11044	glycogenase[c]	m02452[c] + m02040[c] --> m02450[c] + m01840[c]	364745 or 497039 or 24203			Central carbon metabolism	0	0	1000	0	1	3.2.1.1
RCR11045	3-phospho-D-glyceroyl-phosphate:alpha-D-glucose-1-phosphate 6-phosphotransferase	m00247[c] + m01967[c] --> m01966[c] + m00913[c]	685076			Central carbon metabolism	0	0	1000	0	1	2.7.1.106
RCR11046	CTP:D-tagatose 6-phosphate 1-phosphotransferase	m02955[c] + m01424[c] <==> m01746[c] + m01623[c]	60416 or 25741 or 65152			Carbohydrate metabolism	1	-1000	1000	0	1	2.7.1.11		PMID:131802;PMID:1810251;PMID:193556;PMID:2987258;PMID:6091737
RCR11047	UDP-alpha-D-galactose:D-glucose 4-beta-D-galactosyltransferase	m01965[g] + m03107[g] --> m02332[g] + m03106[g]	24528 or 24390 or 313536			Carbohydrate metabolism	0	0	1000	0	1	2.4.1.22
RCR11048	ATP:D-tagatose 6-phosphotransferase	m01745[c] + m01371[c] --> m01746[c] + m01285[c]	25659			Carbohydrate metabolism	0	0	1000	0	1	2.7.1.3
RCR11049	galactitol:NADP+ 1-oxidoreductase	m01910[c] + m02555[c] + m02039[c] <==> m01909[c] + m02554[c]	24192 or 296972 or 286921			Carbohydrate metabolism	1	-1000	1000	0	1	1.1.1.21		PMID12704219
RCR11050	UTP:alpha-D-galactose-1-phosphate uridylyltransferase	m01322[c] + m03130[c] --> m03107[c] + m02759[c]	298003			Carbohydrate metabolism	0	0	1000	0	1	2.7.7.12
RCR11051	ATP:D-glyceraldehyde 3-phosphotransferase	m01981[c] + m01371[c] --> m01939[c] + m01285[c]				Carbohydrate metabolism	0	0	1000	0	1	2.7.1.28		PMID:12125098
RCR11052	ATP:D-fructose 1-phosphotransferase	m01840[c] + m01371[c] --> m01842[c] + m01285[c]	25659			Carbohydrate metabolism	0	0	1000	0	1	2.7.1.3		PMID:2996495;PMID:7833921
RCR11053	L-fucose aldose-ketose-isomerase	m01159[c] --> m02373[c]				Carbohydrate metabolism	0	0	1000	0	1	5.3.1.25		PMID:457669;PMID:5050937
RCR11054	GDP-L-fucose:NADP+ 4-oxidoreductase (3,5-epimerizing)[c]	m01949[c] + m02555[c] + m02039[c] --> m01950[c] + m02554[c]	300036			Carbohydrate metabolism	0	0	1000	0	1	1.1.1.271
RCR11055	Xylitol:NADP+ 4-oxidoreductase (L-xylulose-forming)	m02425[c] + m02555[c] + m02039[c] --> m03155[c] + m02554[c]	171408			Vitamin C metabolism	0	0	1000	0	1	1.1.1.10		PMID:28341;PMID:4397414;PMID:6821187
RCR11056	xylitol:NADP+ oxidoreductase	m01758[c] + m02555[c] + m02039[c] <==> m03155[c] + m02554[c]	24192 or 296972 or 286921			Vitamin C metabolism	1	-1000	1000	0	1	1.1.1.21
RCR11057	xylitol:NAD+ 2-oxidoreductase (D-xylulose-forming)	m03155[c] + m02552[c] --> m01759[c] + m02553[c] + m02039[c]	24788			Vitamin C metabolism	0	0	1000	0	1	1.1.1.9
RCR11058	D-xylose:NADP+ 1-oxidoreductase	m01758[c] + m02554[c] --> m01757[c] + m02555[c] + m02039[c]	691002			Vitamin C metabolism	0	0	1000	0	1	1.1.1.179
RCR11059	L-Arabitol:NADP+ 1-oxidoreductase	m02337[c] + m02555[c] + m02039[c] --> m02338[c] + m02554[c]	171445 or 24192 or 78959			Vitamin C metabolism	0	0	1000	0	1	1.1.1.21;1.1.1.2
RCR11060	L-arabinitol:NAD+ 4-oxidoreductase (L-xylulose-forming)	m02425[c] + m02553[c] + m02039[c] <==> m02338[c] + m02552[c]				Vitamin C metabolism	1	-1000	1000	0	1
RCR11061	L-gulonate:NADP+ 6-oxidoreductase	m01973[r] + m02555[r] + m02039[r] <==> m02378[r] + m02554[r]	78959			Vitamin C metabolism	1	-1000	1000	0	1			PMID9296457
RCR11062	L-Gulonate:NAD+ 3-oxidoreductase	m00768[c] + m02553[c] + m02039[c] <==> m02378[c] + m02552[c]	290277			Vitamin C metabolism	1	-1000	1000	0	1			PMID6821187
RCR11063	3-Dehydro-L-gulonate carboxy-lyase	m00768[c] <==> m02425[c] + m01596[c]				Vitamin C metabolism	1	-1000	1000	0	1
RCR11064	ATP:D-ribulose 5-phosphotransferase	m01743[c] + m01371[c] --> m02846[c] + m01285[c]	362706			Vitamin C metabolism	0	0	1000	0	1
RCR11065	L-gulonate:NADP+ 6-oxidoreductase[c]	m01973[c] + m02555[c] + m02039[c] <==> m02378[c] + m02554[c]	78959			Vitamin C metabolism	1	-1000	1000	0	1	1.1.1.2		PMID:1748675;PMID1748675
RCR11066	(R)-S-Lactoylglutathione methylglyoxal-lyase (isomerizing)	m02475[c] + m02026[c] --> m00168[c]	294320 or 363644			Central carbon metabolism	0	0	1000	0	1	4.4.1.5
RCR11067	Lactaldehyde:NAD+ 1-oxidoreductase	m02475[c] + m02553[c] + m02039[c] --> m02329[c] + m02552[c]	24192 or 296972 or 286921			Central carbon metabolism	0	0	1000	0	1	1.1.1.21
RCR11068	Propane-1,2-diol:NAD+ 1-oxidoreductase	m02329[c] + m02555[c] + m02039[c] --> m02771[c] + m02554[c]	24192 or 296972 or 286921			Central carbon metabolism	0	0	1000	0	1	1.1.1.21
RCR11069	(R)-S-Lactoylglutathione hydrolase	m00168[c] + m02040[c] --> m01716[c] + m02026[c]	24439 or 302995			Central carbon metabolism	0	0	1000	0	1	3.1.2.6
RCR11070	(S)-Malate:NADP+ oxidoreductase(oxaloacetate-decarboxylating)[c]	m02439[c] + m02554[c] --> m02819[c] + m01596[c] + m02555[c] + m02039[c]	24552 or 363110			Central carbon metabolism	0	0	1000	0	1	1.1.1.38;1.1.1.40		PMID:15989682;PMID:16171388;PMID:1935931;PMID:4407365;PMID:4778267;PMID:7757881;PMID:8106447
RCR11071	GTP:oxaloacetate carboxy-lyase (adding GTP,hosphoenolpyruvate-forming)[m]	m02633[m] + m02034[m] --> m02696[m] + m01948[m] + m01596[m]	361042			Central carbon metabolism	0	0	1000	0	1	4.1.1.32		PMID:11851336;PMID:14505680;PMID:728402;PMID:8325643;PMID:8645161;PMID8645161
RCR11072	Pyruvate:carbon-dioxide ligase (ADP-forming)	m02819[m] + m02046[m] + m01371[m] + m02039[m] --> m02633[m] + m02751[m] + m01285[m]	25104			Central carbon metabolism	0	0	1000	0	1	6.4.1.1		PMID:12437512;PMID:7918683;PMID6548474
RCR11073	CTP:pyruvate 2-O-phosphotransferase	m02696[c] + m01424[c] --> m01623[c] + m02819[c]	25630 or 24651 or 100364062			Central carbon metabolism	0	0	1000	0	1	2.7.1.40		PMID:1009117;PMID:7154942
RCR11074	aldose reductase (methylglyoxal)	m02475[c] + m02555[c] + m02039[c] --> m02148[c] + m02554[c]	171445 or 24192 or 78959			Central carbon metabolism	0	0	1000	0	1	1.1.1.21;1.1.1.2		PMID12071861;PMID1537826;PMID9823300
RCR11075	acetone monooxygenase	m01256[c] + m02555[c] + m02630[c] + m02039[c] --> m02148[c] + m02554[c] + m02040[c]	25086			Central carbon metabolism	0	0	1000	0	1			PMID1537826;PMID16037240;PMID8853285
RCR11076	acetol monooxygenase	m02148[c] + m02555[c] + m02630[c] + m02039[c] --> m02475[c] + m02554[c] + 2 m02040[c]	25086			Central carbon metabolism	0	0	1000	0	1			PMID1537826;PMID16037240;PMID8853285
RCR11077	aldose reductase (acetol)	m02148[c] + m02555[c] + m02039[c] --> m02771[c] + m02554[c]	171445 or 24192 or 78959			Central carbon metabolism	0	0	1000	0	1	1.1.1.21;1.1.1.2
RCR11078	glyoxylate reductase (NADP+)	m02475[c] + m02555[c] + m02039[c] --> m01715[c] + m02554[c]	680021			Central carbon metabolism	0	0	1000	0	1	1.1.1.79;1.1.1.81
RCR11079	lactaldehyde dehydrogenase	m02329[c] + m02552[c] + m02040[c] --> m02403[c] + m02553[c] + m02039[c]	25375 or 291450 or 64040 or 65183 or 266603 or 309147 or 688778			Central carbon metabolism	0	0	1000	0	1	1.2.1.4;1.2.1.5
RCR11080	(R)-Lactaldehyde:NAD+ 2-oxidoreductase	m01715[c] + m02552[c] + m02040[c] --> m01716[c] + m02553[c] + m02039[c]	291450 or 29539 or 64040 or 65183 or 298079			Central carbon metabolism	0	0	1000	0	1	1.2.1.3
RCR11081	lactaldehyde dehydrogenase, mitochondrial	m02329[m] + m02552[m] + m02040[m] --> m02403[m] + m02553[m] + m02039[m]	291450 or 29539 or 64040 or 65183 or 298079			Central carbon metabolism	0	0	1000	0	1	1.2.1.3
RCR11082	alcohol dehydrogenase (L-1,2-propanediol)	m02771[c] + m02552[c] --> m02329[c] + m02553[c] + m02039[c]	100145871 or 171178 or 362474 or 310903 or 29646 or 24172 or 291403			Central carbon metabolism	0	0	1000	0	1
RCR11083	Propane-1,2-diol:NADP+ 1-oxidoreductase	m01715[c] + m02555[c] + m02039[c] --> m02771[c] + m02554[c]	171445 or 24192 or 78959			Central carbon metabolism	0	0	1000	0	1	1.1.1.21;1.1.1.2
RCR11084	(R)-S-Lactoylglutathione hydrolase[m]	m00168[m] + m02040[m] --> m01716[m] + m02026[m]	24439 or 302995			Central carbon metabolism	0	0	1000	0	1	3.1.2.6
RCR11085	(R)-Lactate:NAD+ oxidoreductase	m01716[c] + m02552[c] <==> m02819[c] + m02553[c] + m02039[c]	307858			Central carbon metabolism	1	-1000	1000	0	1	1.1.2.4
RCR11086	glycerone-phosphate phosphate-lyase (methylglyoxal-forming)	m01939[c] --> m02475[c] + m02751[c]				Central carbon metabolism	0	0	1000	0	1	4.2.3.3		PMID1537826;PMID16037240;PMID8853285
RCR11087	(S)-Lactate:NAD+ oxidoreductase[m]	m02819[m] + m02553[m] + m02039[m] <==> m02403[m] + m02552[m]	24533 or 24534 or 29634 or 369018			Central carbon metabolism	1	-1000	1000	0	1	1.1.1.27		PMID:12042361;PMID:17045662;PMID:7449128;PMID:9927705;PMID:18253497
RCR11088	propanoyl-CoA:electron-transfer flavoprotein 2,3-oxidoreductase	m02774[m] + m01802[m] <==> m01265[m] + m01803[m]	24158 or 64304 or 315973 or 25618 or 294973 or 367196 or 304500			Central carbon metabolism	1	-1000	1000	0	1	1.3.99.3		PMID12359132;PMID12359260;PMID15560374;PMID2565344;PMID3035565;PMID7698750;PMID8276399
RCR11089	malonyl-CoA carboxy-lyase (acetyl-CoA-forming)[m]	m02444[m] --> m01596[m] + m01261[m]	85239			Central carbon metabolism	0	0	1000	0	1	4.1.1.9		PMID:101148;PMID:10455107;PMID:15003260;PMID:4180063;PMID:4731972;PMID:5578610;PMID:9869665
RCR11090	Propionyladenylate:CoA propionyltransferase[c]	m02774[c] + m01334[c] <==> m02775[c] + m01597[c]	311569 or 296259 or 314800			Central carbon metabolism	1	-1000	1000	0	1	6.2.1.17;6.2.1.1		PMID:10843999;PMID:1924964;PMID:2009071;PMID:2884217;PMID:7341659
RCR11091	ATP:propanoate adenylyltransferase	m02772[c] + m01371[c] <==> m02775[c] + m02759[c]	311569 or 296259 or 314800			Central carbon metabolism	1	-1000	1000	0	1	6.2.1.1;6.2.1.17		PMID:10843999;PMID:1924964;PMID:2009071;PMID:2884217;PMID:7341659
RCR11092	Acetoacetate carboxy-lyase (acetone-forming)	m01253[m] --> m01256[m] + m01596[m]				Central carbon metabolism	0	0	1000	0	1	4.1.1.4		PMID:4076528;PMID:4624981;PMID:963888
RCR11093	propanoyl-CoA:oxaloacetate C-propanoyltransferase (thioester-hydrolysing, 1-carboxyethyl-forming)	m02633[c] + m02774[c] + m02040[c] --> m00665[c] + m01597[c]				Central carbon metabolism	0	0	1000	0	1
RCR11094	3-oxopropionyl-CoA:NAD+ oxidoreductase	m02444[m] + m02555[m] + m02039[m] <==> m03168[m] + m02554[m] + m02040[m]				Central carbon metabolism	1	-1000	1000	0	1
RCR11095	3-hydroxypropionyl-CoA:NADP+ oxidoreductase	m00799[m] + m02554[m] <==> m03168[m] + m02555[m] + m02039[m]				Central carbon metabolism	1	-1000	1000	0	1	1.1.1.-
RCR11096	2-Hydroxyglutarate:(acceptor) 2-oxidoreductase	m01306[c] + m01803[c] --> m00653[c] + m01802[c]	314196			Central carbon metabolism	0	0	1000	0	1	1.1.99.2
RCR11097	phosphoglycerate dehydrogenase	m01306[c] + m02553[c] + m02039[c] --> m00653[c] + m02552[c]	58835			Central carbon metabolism	0	0	1000	0	1	1.1.1.95
RCR11098	butanoyl-CoA:electron-transfer flavoprotein 2,3-oxidoreductase	m01412[m] + m01802[m] --> m01622[m] + m01803[m]	24158 or 64304 or 315973 or 25618 or 294973 or 367196 or 304500			Central carbon metabolism	0	0	1000	0	1	1.3.99.3		PMID:13295225;PMID:3597357;PMID2565344
RCR11099	acetyl-CoA:acetoacetyl-CoA C-acetyltransferase (thioester-hydrolysing, carboxymethyl-forming)[p]	m01255[p] + m01261[p] + m02040[p] --> m02131[p] + m01597[p]	24450 or 29637			Central carbon metabolism	0	0	1000	0	1	2.3.3.10		PMID:11087424;PMID:11108725;PMID:1358203;PMID:7893153
RCR11100	D-glucose-6-phosphate:NADP+ 1-oxidoreductase	m01968[r] + m02554[r] --> m01961[r] + m02555[r] + m02039[r]	24377			Pentose phosphate pathway	0	0	1000	0	1	1.1.1.49		PMID:15774558;PMID:16756494;PMID:2753047;PMID:4169027;PMID10349511;PMID12831846;PMID2156506
RCR11101	D-glucose-6-phosphate:NADP+ 1-oxidoreductase[c]	m01961[c] + m02555[c] + m02039[c] <==> m01968[c] + m02554[c]	24377			Pentose phosphate pathway	1	-1000	1000	0	1	1.1.1.49		PMID:15774558;PMID:16756494;PMID:2753047;PMID:4169027
RCR11102	ATP:D-ribose 5-phosphotransferase	m02845[c] + m01285[c] <==> m02843[c] + m01371[c]	362704 or 362706			Pentose phosphate pathway	1	-1000	1000	0	1	2.7.1.15		PMID:13295274;PMID:17618002
RCR11103	D-ribose-5-phosphate aldose-ketose-isomerase[c]	m02845[c] <==> m02846[c]	362383			Pentose phosphate pathway	1	-1000	1000	0	1	5.3.1.6		PMID:14690456;PMID:14988808;PMID:15234337;PMID:2843500
RCR11104	D-Ribose 1,5-phosphomutase	m02844[c] <==> m02845[c]	24645 or 289632			Pentose phosphate pathway	1	-1000	1000	0	1	5.4.2.2;5.4.2.7		PMID:14953458;PMID:3023765;PMID:5769188;PMID:8050998
RCR11105	2-deoxy-D-ribose-5-phosphate acetaldehyde-lyase (D-glyceraldehyde-3-phosphate-forming)	m00640[c] <==> m01939[c] + m01249[c]	690945			Pentose phosphate pathway	1	-1000	1000	0	1	4.1.2.4		PMID:4989681;PMID:9226884
RCR11106	6-phospho-D-gluconate:NADP+ 2-oxidoreductase (decarboxylating)	m01169[r] + m02554[r] --> m02846[r] + m01596[r] + m02555[r] + m02039[r]	100360180			Pentose phosphate pathway	0	0	1000	0	1	1.1.1.44		PMID:12398160;PMID:1504088;PMID:15558954;PMID:16756494;PMID:2753047;PMID:3943305;PMID:6212636;PMID:7194116;PMID:7225115;PMID:7623792
RCR11107	6-phospho-D-gluconate:NADP+ 2-oxidoreductase (decarboxylating)[c]	m01169[c] + m02554[c] --> m02846[c] + m01596[c] + m02555[c] + m02039[c]	100360180			Pentose phosphate pathway	0	0	1000	0	1	1.1.1.44		PMID:12398160;PMID:1504088;PMID:15558954;PMID:16756494;PMID:2753047;PMID:3943305;PMID:6212636;PMID:7194116;PMID:7225115;PMID:7623792
RCR11108	ATP:D-Gluconate 6-phosphotransferase	m01169[c] + m01285[c] <==> m01683[c] + m01371[c]	302642 or 360547			Pentose phosphate pathway	1	-1000	1000	0	1	2.3.1.57		PMID:10978316
RCR11109	6-phosphofructokinase	m02883[c] + m03106[c] <==> m02884[c] + m03130[c]	60416 or 25741 or 65152			Pentose phosphate pathway	1	-1000	1000	0	1	2.7.1.11		PMID:11945275
RCR11110	aldehyde dehydrogenase [NAD(P)+]	m02843[c] + m02553[c] + m02039[c] <==> m02841[c] + m02552[c]	25375 or 266603 or 309147 or 688778			Pentose phosphate pathway	1	-1000	1000	0	1	1.2.1.5		PMID:15234337
RCR11111	deoxyribose-phosphate aldolase	m01672[c] + m01371[c] --> m00640[c] + m01285[c]	362704 or 362706			Pentose phosphate pathway	0	0	1000	0	1	2.7.1.15
RCR11112	ATP:GMP phosphotransferase[m]	m01948[m] + m01285[m] <==> m02016[m] + m01371[m]	303179			Purine metabolism	1	-1000	1000	0	1	2.7.4.8		PMID:8663313;PMID17727616
RCR11113	N6-(1,2-dicarboxyethyl)AMP AMP-lyase (fumarate-forming)	m01862[c] + m01334[c] <==> m01282[c]	315150 or 192178			Purine metabolism	1	-1000	1000	0	1	4.3.2.2		PMID:1872474;PMID1302001;PMID2004782
RCR11114	guanosine 5'-monophosphate phosphohydrolase	m02016[c] + m02040[c] --> m02038[c] + m02751[c]	56780 or 360629 or 312373 or 58813 or 298881 or 287368 or 313574 or 100360582 or 100363253 or 288489			Purine metabolism	0	0	1000	0	1	3.1.3.5		PMID:10899995;PMID8450671
RCR11115	ATP:guanosine 5'-phosphotransferase	m02016[m] + m01285[m] --> m02038[m] + m01371[m]				Purine metabolism	0	0	1000	0	1	2.7.1.73
RCR11116	ATP:dAMP phosphotransferase	m01637[c] + m01285[c] <==> m01639[c] + m01371[c]	24183 or 24184 or 29223 or 301115 or 311833 or 314416 or 365985 or 102238592 or 294521			Purine metabolism	1	-1000	1000	0	1	2.7.4.11;2.7.4.3		PMID:11768308;PMID11768308
RCR11117	Adenosine aminohydrolase	m01280[c] + m02040[c] --> m02170[c] + m02578[c]	24165			Purine metabolism	0	0	1000	0	1	3.5.4.4		PMID:15016824
RCR11118	dATP:D-glucosamine 6-phosphotransferase	m01962[c] + m01642[c] --> m01963[c] + m01637[c]	25059 or 25060 or 25058 or 100364027			Purine metabolism	0	0	1000	0	1	2.7.1.1		PMID:16906315;PMID:7061426;PMID:7150652;PMID:8717435
RCR11119	Guanine aminohydrolase	m02037[c] + m02040[c] --> m03148[c] + m02578[c]	83585			Purine metabolism	0	0	1000	0	1	3.5.4.3		PMID:10348987;PMID:14342518;PMID:16742482;PMID:4821397;PMID:4822729;PMID:950009
RCR11120	hypoxanthine:NAD+ oxidoreductase	m02159[c] + m02552[c] + m02040[c] --> m03148[c] + m02553[c] + m02039[c]	497811			Purine metabolism	0	0	1000	0	1	1.17.1.4		PMID:2713424;PMID:8248161;PMID2713424;PMID8248161
RCR11121	Hypoxanthine:oxygen oxidoreductase	m02159[c] + m02630[c] + m02040[c] --> m03148[c] + m02041[c]	497811			Purine metabolism	0	0	1000	0	1	1.17.3.2		PMID:11993848;PMID:1643670;PMID:3010873;PMID:8343533;PMID11993848;PMID1643670;PMID3010873;PMID8343533
RCR11122	inosine:phosphate alpha-D-ribosyltransferase	m02170[c] + m02751[c] <==> m02844[c] + m02159[c]	290029			Purine metabolism	1	-1000	1000	0	1	2.4.2.1		PMID:2301;PMID:37803;UNIPROT:P00491;PMID14706628;PMID6087295;PMID9305963
RCR11123	2'-Deoxyuridine 5'-triphosphate:oxydized-thioredoxin 2'-oxidoreductase	m02990[c] + m01623[c] --> m02666[c] + m01645[c] + m02040[c]	685579 and 362720 and 299976			Purine metabolism	0	0	1000	0	1	1.17.4.1		PMID:6121703;PMID:8074691;PMID6121703;PMID8074691
RCR11124	2'-Deoxyuridine 5'-triphosphate:oxydized-thioredoxin 2'-oxidoreductase[c]	m02990[c] + m03130[c] --> m02666[c] + m01756[c] + m02040[c]	685579 and 362720 and 299976			Purine metabolism	0	0	1000	0	1	1.17.4.1		PMID:6121703;PMID:8074691;PMID6121703;PMID8074691
RCR11125	xanthine:NAD+ oxidoreductase[p]	m03148[p] + m02552[p] + m02040[p] --> m03120[p] + m02553[p] + m02039[p]	497811			Purine metabolism	0	0	1000	0	1	1.17.1.4		PMID:11246119;PMID:12632927;PMID12637268;PMID8670112
RCR11126	Xanthine:oxygen oxidoreductase[p]	m03148[p] + m02630[p] + m02040[p] --> m03120[p] + m02041[p]	497811			Purine metabolism	0	0	1000	0	1	1.17.3.2		PMID:16087479;PMID:1643670;PMID:16756494;PMID:18600557;PMID:8343533;PMID12637268;PMID8670112
RCR11127	guanosine:phosphate alpha-D-ribosyltransferase	m02038[c] + m02751[c] <==> m02037[c] + m02844[c]	290029			Purine metabolism	1	-1000	1000	0	1	2.4.2.15;2.4.2.1		PMID:2301;PMID:37803;UNIPROT:P00491;PMID6087295;PMID9305963
RCR11128	Deoxyinosine:orthophosphate ribosyltransferase	m00639[c] + m02159[c] <==> m01671[c] + m02751[c]	290029 or 315219			Purine metabolism	1	-1000	1000	0	1	2.4.2.1;2.4.2.4		PMID:2301;PMID:37803;UNIPROT:P00491;PMID14706628;PMID6087295;PMID9305963
RCR11129	5-Phospho-D-ribosylamine:glycine ligase (ADP-forming)	m01131[c] + m01986[c] + m01371[c] --> m01940[c] + m02751[c] + m01285[c]	288259			Purine metabolism	0	0	1000	0	1	6.3.4.13		PMID:8299947
RCR11130	2-(Formamido)-N1-(5-phosphoribosyl)acetamidine cyclo-ligase (ADP-forming)	m01132[c] + m01371[c] --> m01305[c] + m02751[c] + m01285[c]	288259			Purine metabolism	0	0	1000	0	1	6.3.3.1		PMID:4084560
RCR11131	1-(5-phospho-D-ribosyl)-5-amino-4-imidazolecarboxylate carboxy-lyase	m01130[c] <==> m01305[c] + m01596[c]	140946			Purine metabolism	1	-1000	1000	0	1	4.1.1.21		PMID:4772278;UNIPROT:P22234
RCR11132	10-Formyltetrahydrofolate:5'-phosphoribosyl-5-amino-4-imidazolecarboxamide formyltransferase	m01304[c] + m00266[c] <==> m01804[c] + m02980[c]	81643			Purine metabolism	1	-1000	1000	0	1	2.1.2.3		PMID:11381136;PMID11948179;PMID14966129;PMID9378707
RCR11133	GTP:uridine 5'-phosphotransferase	m03123[c] + m02034[c] --> m03114[c] + m01948[c]	311864 or 499956 or 304944			Purine metabolism	0	0	1000	0	1	2.7.1.48
RCR11134	ATP:dGMP phosphotransferase	m01680[c] + m01285[c] <==> m01686[c] + m01371[c]	303179			Purine metabolism	1	-1000	1000	0	1	2.7.4.8		PMID:164875;PMID:211390;PMID:3024975;PMID:4307347;PMID:5552394
RCR11135	Allantoate amidinohydrolase	m01312[c] + m02040[c] --> m03122[c] + m03121[c]	246758			Purine metabolism	0	0	0	0	1	3.5.3.4
RCR11136	alloxan detoxification	m03120[c] + m02041[c] <==> m01315[c] + m03121[c]	94167 or 287610 or 303414 or 554172			Purine metabolism	1	-1000	0	0	1	1.11.1.7	problematic	PMID:10600166
RCR11137	RCR11137[c]	m03119[c] + m02040[c] <==> m03120[c] + m02147[c]				Purine metabolism	1	-1000	1000	0	1			PMID:8325534
RCR11138	RCR11138[c]	m03119[c] + m01368[c] <==> m02489[c] + m03120[c]				Purine metabolism	1	-1000	1000	0	1			PMID:8325534
RCR11139	RCR11139[c]	m03119[c] + m02040[c] <==> m02149[c] + m03120[c]				Purine metabolism	1	-1000	1000	0	1
RCR11140	(S)-allantoin amidohydrolase	m01313[c] + m02040[c] <==> m01312[c]				Purine metabolism	1	-1000	1000	0	1	3.5.2.5		PMID:11342423;PMID:8248161
RCR11141	RCR11141[c]	m01104[c] + m02040[c] --> m01313[c] + m01596[c]				Purine metabolism	0	0	0	0	1			PMID:8248161;PMID:11342423
RCR11142	urate:oxygen oxidoreductase	m03120[c] + m02630[c] + m02040[c] --> m01104[c] + m02041[c]	114768			Purine metabolism	0	0	1000	0	1	1.7.3.3	problematic	PMID16462750;PMID2594778
RCR11143	ADP-ribose ribophosphohydrolase	m01288[c] + m02040[c] --> m02845[c] + m01334[c]	287406 or 305149 or 361274 or 294329			Purine metabolism	0	0	1000	0	1	3.6.1.13;3.6.1.53
RCR11144	Hypoxanthine:oxygen oxidoreductase[p]	m02159[p] + m02630[p] + m02040[p] --> m03148[p] + m02041[p]	497811			Purine metabolism	0	0	1000	0	1	1.17.3.2		PMID18538891;PMID18538892
RCR11145	Adenine aminohydrolase	m01279[c] + m02040[c] --> m02159[c] + m02578[c]				Purine metabolism	0	0	1000	0	1
RCR11146	ATP:UDP phosphotransferase[c]	m03130[c] + m01285[c] <==> m03106[c] + m01371[c]	191575 or 83782 or 171566 or 58964 or 685679 or 688903 or 85269			Pyrimidine metabolism	1	-1000	1000	0	1	2.7.4.6		PMID:132087
RCR11147	ATP:CDP phosphotransferase[c]	m01623[c] + m01285[c] <==> m01424[c] + m01371[c]	191575 or 83782 or 171566 or 58964 or 685679 or 688903 or 85269			Pyrimidine metabolism	1	-1000	1000	0	1	2.7.4.6		PMID:132087
RCR11148	ATP:dUDP phosphotransferase[m]	m01754[m] + m01371[m] --> m01756[m] + m01285[m]	191575 or 83782 or 171566 or 58964 or 685679 or 688903 or 85269			Pyrimidine metabolism	0	0	1000	0	1	2.7.4.6		PMID:132087;PMID9099850
RCR11149	nucleoside-diphosphate kinase[n]	m01753[n] + m01637[n] <==> m01747[n] + m01642[n]	191575 or 83782 or 171566 or 58964 or 685679 or 688903 or 85269			Pyrimidine metabolism	1	-1000	1000	0	1	2.7.4.6		PMID:3026468;PMID3026468
RCR11150	(R)-3-Amino-2-methylpropanoate:pyruvate aminotransferase	m00661[m] + m01307[m] <==> m01633[m] + m02819[m]	83784			Pyrimidine metabolism	1	-1000	1000	0	1	2.6.1.40		PMID:5773299
RCR11151	NADPH:oxidized-thioredoxin oxidoreductase	m02666[c] + m02555[c] + m02039[c] --> m02990[c] + m02554[c]	50551 or 58819 or 297437			Pyrimidine metabolism	0	0	1000	0	1	1.8.1.9		PMID:10462449;PMID:11060283;PMID:15110392;PMID8577704;PMID8999974
RCR11152	uridine 5'-monophosphate phosphohydrolase	m03114[c] + m02040[c] --> m03123[c] + m02751[c]	100360582 or 287368 or 298881 or 312373 or 313574 or 360629 or 58813			Pyrimidine metabolism	0	0	1000	0	1	3.1.3.5		PMID11795870
RCR11153	UTP:ammonia ligase (ADP-forming)	m03130[c] + m02578[c] + m01371[c] --> m01623[c] + m02751[c] + m01285[c]	619580 or 313560			Pyrimidine metabolism	0	0	1000	0	1	6.3.4.2		PMID:10064135;PMID:7695960;PMID:8365402;PMID:932036
RCR11154	carbamoyl-phosphate:L-aspartate carbamoyltransferase	m02559[c] + m02751[c] <==> m01420[c] + m01370[c]	24240			Pyrimidine metabolism	1	-1000	1000	0	1	2.1.3.2		PMID:13319326;PMID:29209
RCR11155	thymidylate 5'-phosphohydrolase[c]	m01752[c] + m02040[c] --> m02996[c] + m02751[c]	56780 or 360629 or 312373 or 58813 or 298881 or 287368 or 313574 or 100360582 or 100363253 or 288489			Pyrimidine metabolism	0	0	1000	0	1	3.1.3.5;3.1.3.35		PMID:14235544;PMID:15262124;PMID:15990964;PMID4291247
RCR11156	cytidine-5'-monophosphate phosphohydrolase	m01590[c] + m02040[c] --> m01630[c] + m02751[c]	56780 or 360629 or 312373 or 58813 or 298881 or 287368 or 313574 or 100360582 or 100363253 or 288489			Pyrimidine metabolism	0	0	1000	0	1	3.1.3.5		PMID:7479738;PMID11795870
RCR11157	GTP:cytidine 5'-phosphotransferase	m01630[c] + m02034[c] --> m01948[c] + m01590[c]	303755 or 313744 or 298250 or 304885 or 498034			Pyrimidine metabolism	0	0	1000	0	1	2.7.1.-
RCR11158	UTP:L-glutamine amido-ligase (ADP-forming)	m03130[c] + m01975[c] + m01371[c] + m02040[c] --> m01623[c] + m01974[c] + m02751[c] + m01285[c]	619580 or 313560			Pyrimidine metabolism	0	0	1000	0	1	6.3.4.2		PMID:16820675;PMID:932036
RCR11159	UTP:pyruvate 2-O-phosphotransferase	m02696[c] + m03106[c] --> m03130[c] + m02819[c]	25630 or 24651 or 100364062			Pyrimidine metabolism	0	0	1000	0	1	2.7.1.40		PMID:1009117;PMID:7154942
RCR11160	5,6-Dihydrouracil:NADP+ oxidoreductase	m01052[c] + m02554[c] <==> m03118[c] + m02555[c] + m02039[c]	81656			Pyrimidine metabolism	1	-1000	1000	0	1	1.3.1.2		PMID:15450176;PMID:8429016;PMID1512248;PMID8221682
RCR11161	5,6-Dihydrouracil amidohydrolase	m01052[c] + m02040[c] --> m00923[c]	25416 or 65135 or 25418			Pyrimidine metabolism	0	0	1000	0	1	3.5.2.2		PMID:2827580
RCR11162	5,6-dihydrothymine:NAD+ oxidoreductase	m02997[c] + m02553[c] + m02039[c] --> m01705[c] + m02552[c]	81656			Pyrimidine metabolism	0	0	1000	0	1	1.3.1.2		PMID:1260500;PMID:8615641;PMID1260500;PMID8615641
RCR11163	5,6-dihydrothymine:NAD+ oxidoreductase[m]	m02997[m] + m02553[m] + m02039[m] --> m01705[m] + m02552[m]	81656			Pyrimidine metabolism	0	0	1000	0	1	1.3.1.2		PMID:1260500;PMID:8615641;PMID1260500;PMID8615641
RCR11164	5,6-Dihydrothymine:NADP+ oxidoreductase	m02997[c] + m02555[c] + m02039[c] --> m01705[c] + m02554[c]	81656			Pyrimidine metabolism	0	0	1000	0	1	1.3.1.2		PMID:15450176;PMID1512248;PMID8221682
RCR11165	thymidine:phosphate deoxy-alpha-D-ribosyltransferase	m00639[c] + m02997[c] <==> m02996[c] + m02751[c]	290029 or 315219			Pyrimidine metabolism	1	-1000	1000	0	1	2.4.2.1;2.4.2.4		PMID:15262124;PMID:15990964;PMID7028324;PMID718961;PMID9693094
RCR11166	ATP:dCMP phosphotransferase[c]	m01643[c] + m01285[c] <==> m01644[c] + m01371[c]	298410			Pyrimidine metabolism	1	-1000	1000	0	1	2.7.4.14		PMID:10462544;PMID:11912132
RCR11167	uridine:phosphate alpha-D-ribosyltransferase	m03123[c] + m02751[c] <==> m02844[c] + m03118[c]	289801 or 295620			Pyrimidine metabolism	1	-1000	1000	0	1	2.4.2.3		PMID:8339277;PMID11278417;PMID12084455;PMID12849978;PMID7488099
RCR11168	Cytidine aminohydrolase[c]	m01630[c] + m02040[c] --> m03123[c] + m02578[c]	498251 or 100909857 or 399679 or 362638			Pyrimidine metabolism	0	0	1000	0	1	3.5.4.5		PMID:17066440;PMID:17560270;PMID:17640070;PMID:17672864;PMID:18306229
RCR11169	(S)-dihydroorotate amidohydrolase	m00180[c] + m02040[c] <==> m02559[c]	24240			Pyrimidine metabolism	1	-1000	1000	0	1	3.5.2.3		PMID:2903106;PMID:4831620
RCR11170	ATP:dTMP phosphotransferase	m01747[c] + m01285[c] <==> m01752[c] + m01371[c]	301622			Pyrimidine metabolism	1	-1000	1000	0	1	2.7.4.12;2.7.4.9		PMID:8845311
RCR11171	dUTP nucleotidohydrolase	m01756[m] + m02040[m] --> m01755[m] + m02759[m]	497778 or 311422			Pyrimidine metabolism	0	0	1000	0	1	3.6.1.23;3.6.1.19		PMID:8631816
RCR11172	5,10-Methylenetetrahydrofolate:dUMP C-methyltransferase	m01755[c] + m01045[c] <==> m01752[c] + m01700[c]	29261			Pyrimidine metabolism	1	-1000	1000	0	1	2.1.1.45		PMID:15375535;PMID:15992031;PMID:34155;PMID:3567221;PMID:8621617;PMID14967037;PMID2243092
RCR11173	dUTP:cytidine 5'-phosphotransferase	m01630[c] + m01756[c] --> m01754[c] + m01590[c]	311864 or 499956 or 304944			Pyrimidine metabolism	0	0	1000	0	1	2.7.1.48		PMID:11306702;PMID:9923963;UNIPROT:Q9HA47
RCR11174	5,6-Dihydrothymine amidohydrolase	m01705[c] + m02040[c] --> m00922[c]	65135			Pyrimidine metabolism	0	0	1000	0	1	3.5.2.2		PMID:17065093;UNIPROT:Q14117
RCR11175	3-Ureidoisobutyrate amidohydrolase	m00922[c] + m02040[c] --> m01633[c] + m02578[c] + m01596[c]	116593			Pyrimidine metabolism	0	0	1000	0	1	3.5.1.6		PMID:10542323;PMID:3678231
RCR11176	ATP:uridine 5'-phosphotransferase	m03123[c] + m01371[c] --> m03114[c] + m01285[c]	311864 or 499956 or 304944			Pyrimidine metabolism	0	0	1000	0	1	2.7.1.48		PMID:11306702;PMID:9923963;UNIPROT:Q9HA47
RCR11177	dUTP:uridine 5'-phosphotransferase	m01756[c] + m03123[c] --> m01754[c] + m03114[c]	311864 or 499956 or 304944			Pyrimidine metabolism	0	0	1000	0	1	2.7.1.48		PMID:11306702;PMID:11494055;PMID:64250;PMID:9923963
RCR11178	2'-Deoxyadenosine 5'-diphosphate:oxidized-thioredoxin 2'-oxidoreductase[m]	m02486[m] + m01637[m] + m02040[m] --> m02487[m] + m01285[m]	685579 and 362720 and 299976			Pyrimidine metabolism	0	0	1000	0	1	1.17.4.1		PMID:5553404;PMID:5671058
RCR11179	2'-Deoxyguanosine 5'-diphosphate:oxidized-thioredoxin 2'-oxidoreductase[m]	m02486[m] + m01680[m] + m02040[m] --> m02487[m] + m01948[m]	685579 and 362720 and 299976			Pyrimidine metabolism	0	0	1000	0	1	1.17.4.1		PMID:5553404;PMID:5671058
RCR11180	NADPH:oxidized-thioredoxin oxidoreductase[m]	m02486[m] + m02555[m] + m02039[m] --> m02487[m] + m02554[m]	50551 or 58819 or 297437			Pyrimidine metabolism	0	0	1000	0	1	1.8.1.9		PMID:5553404;PMID:5671058
RCR11181	dTMP kinase	m01747[n] + m01637[n] <==> m01752[n] + m01642[n]	301622			Pyrimidine metabolism	1	-1000	1000	0	1	2.7.4.9		PMID:8024690;PMID8024690
RCR11182	2'-Deoxyuridine 5'-triphosphate:oxydized-thioredoxin 2'-oxidoreductase[m]	m02666[m] + m01756[m] + m02040[m] <==> m02990[m] + m03130[m]	685579 and 362720 and 299976			Pyrimidine metabolism	1	-1000	1000	0	1	1.17.4.1		PMID:6997299;PMID:8483833;PMID6997299;PMID8483833
RCR11183	thymidine kinase[m]	m01673[m] + m01688[m] --> m01755[m] + m01680[m]	291824			Pyrimidine metabolism	0	0	1000	0	1	2.7.1.21		PMID:11812127
RCR11184	uracil hydro-lyase (adding D-ribose 5-phosphate,seudouridine-5'-phosphate-forming)	m02807[c] + m02040[c] <==> m03118[c] + m02845[c]	315550			Pyrimidine metabolism	1	-1000	1000	0	1	4.2.1.70
RCR11185	2-deoxy-D-ribose 1-phosphate phosphorylase	m00639[c] + m02040[c] --> m01672[c] + m02751[c]				Pyrimidine metabolism	0	0	1000	0	1			PMID9693094
RCR11186	Cytosine aminohydrolase	m01632[c] + m02040[c] --> m03118[c] + m02578[c]				Pyrimidine metabolism	0	0	1000	0	1
RCR11187	ATP:thymidine 5'-phosphotransferase	m02996[c] + m01371[c] --> m01752[c] + m01285[c]	24834			Nucleotide metabolism	0	0	1000	0	1	2.7.1.21		PMID:1063125;PMID:14519855;PMID:3457791
RCR11188	ATP:cytidine 5'-phosphotransferase	m01630[c] + m01371[c] --> m01590[c] + m01285[c]	311864 or 499956 or 304944			Nucleotide metabolism	0	0	1000	0	1	2.7.1.48		PMID:132087;PMID:64250
RCR11189	5,6-dihydrouracil:NAD+ oxidoreductase	m01052[c] + m02552[c] <==> m03118[c] + m02553[c] + m02039[c]				Nucleotide metabolism	1	-1000	1000	0	1	1.3.1.1		PMID:1260500;PMID1260500
RCR11190	dCMP aminohydrolase	m01644[c] + m02040[c] --> m01755[c] + m02578[c]	290741			Nucleotide metabolism	0	0	1000	0	1	3.5.4.12		PMID:8448179
RCR11191	dCDP nucleotidohydrolase	m01643[c] + m02040[c] --> m01644[c] + m02751[c]	192252			Nucleotide metabolism	0	0	1000	0	1	3.6.1.12		PMID:6121703
RCR11192	ATP:deoxyguanosine 5'-phosphotransferase	m01669[m] + m01371[m] --> m01686[m] + m01285[m]	297389			Nucleotide metabolism	0	0	1000	0	1	2.7.1.113		PMID:15748706
RCR11193	ATP:dUMP phosphotransferase[m]	m01755[m] + m01371[m] --> m01754[m] + m01285[m]	301622			Nucleotide metabolism	0	0	1000	0	1	2.7.4.4;2.7.4.9		PMID:13363863;PMID:13363863mitochondrion;PMID17999954
RCR11194	deoxyuridine:orthophosphate 2-deoxy-D-ribosyltransferase	m00639[c] + m03118[c] <==> m01673[c] + m02751[c]	289801 or 295620			Nucleotide metabolism	1	-1000	1000	0	1	2.4.2.3		PMID:14038100;PMID:14156740;PMID:6198074;PMID:7838140;PMID11278417;PMID12849978;PMID6087295;PMID9305963
RCR11195	ATP:deoxyuridine 5'-phosphotransferase[m]	m01673[m] + m01371[m] --> m01755[m] + m01285[m]	291824			Nucleotide metabolism	0	0	1000	0	1	2.7.1.21
RCR11196	2'-deoxyuridine 5'-monophosphate phosphohydrolase[m]	m01755[m] + m02040[m] --> m01673[m] + m02751[m]	287368 or 100360582			Nucleotide metabolism	0	0	1000	0	1	3.1.3.-		PMID10899995
RCR11197	exodeoxyribonuclease III	m01721[c] + m02040[c] --> 0.3 m01639[c] + 0.2 m01686[c] + 0.3 m01752[c] + 0.2 m01644[c]	100049583 or 294800 or 100361529 or 301014 or 309275			Nucleotide metabolism	0	0	1000	0	1	3.1.11.2
RCR11198	adenosine 5'-monophosphate phosphohydrolase[l]	m01334[l] + m02040[l] --> m01280[l] + m02751[l]	100360582 or 287368 or 298881 or 312373 or 313574 or 360629 or 58813			Nucleotide metabolism	0	0	1000	0	1	3.1.3.5
RCR11199	uridine 5'-monophosphate phosphohydrolase[l]	m03114[l] + m02040[l] --> m03123[l] + m02751[l]	100360582 or 287368 or 298881 or 312373 or 313574 or 360629 or 58813			Nucleotide metabolism	0	0	1000	0	1	3.1.3.5
RCR11200	uridine 5'-monophosphate phosphohydrolase[m]	m03114[m] + m02040[m] --> m03123[m] + m02751[m]	100360582 or 287368 or 298881 or 312373 or 313574 or 360629 or 58813			Nucleotide metabolism	0	0	1000	0	1			PMID10899995
RCR11201	cytidine-5'-monophosphate phosphohydrolase[l]	m01590[l] + m02040[l] --> m01630[l] + m02751[l]	100360582 or 287368 or 298881 or 312373 or 313574 or 360629 or 58813			Nucleotide metabolism	0	0	1000	0	1	3.1.3.5
RCR11202	guanosine 5'-monophosphate phosphohydrolase[l]	m02016[l] + m02040[l] --> m02038[l] + m02751[l]	100360582 or 287368 or 298881 or 312373 or 313574 or 360629 or 58813			Nucleotide metabolism	0	0	1000	0	1	3.1.3.5
RCR11203	adenylate kinase (d form)	2 m01637[c] <==> m01639[c] + m01642[c]	365985			Nucleotide metabolism	1	-1000	1000	0	1	2.7.4.3		PMID10215863
RCR11204	UMP kinase (CTP)	m01424[c] + m03106[c] <==> m01623[c] + m03114[c]	298410			Nucleotide metabolism	1	-1000	1000	0	1	2.7.4.14		PMID10462544;PMID11912132
RCR11205	UMP kinase (CTP),nuclear	m01424[n] + m03106[n] <==> m01623[n] + m03114[n]	298410			Nucleotide metabolism	1	-1000	1000	0	1	2.7.4.14		PMID10462544;PMID11912132
RCR11206	UMP kinase (UTP)	2 m03106[c] <==> m03130[c] + m03114[c]	298410			Nucleotide metabolism	1	-1000	1000	0	1	2.7.4.14		PMID10462544;PMID11912132
RCR11207	UMP kinase (GTP),nuclear	m01948[n] + m03106[n] <==> m02034[n] + m03114[n]	298410			Nucleotide metabolism	1	-1000	1000	0	1	2.7.4.14		PMID10462544;PMID11912132
RCR11208	ATP:dIDP phosphotransferase	m01714[n] + m01285[n] <==> m01693[n] + m01371[n]	191575 or 83782			Nucleotide metabolism	1	-1000	1000	0	1	2.7.4.6		PMID7050910
RCR11209	ATP:GDP phosphotransferase[n]	m02034[n] + m01285[n] <==> m01948[n] + m01371[n]	191575 or 83782			Nucleotide metabolism	1	-1000	1000	0	1	2.7.4.6		PMID15242782
RCR11210	ATP:CDP phosphotransferase[n]	m01623[n] + m01285[n] <==> m01424[n] + m01371[n]	191575 or 83782			Nucleotide metabolism	1	-1000	1000	0	1	2.7.4.6		PMID7050910
RCR11211	ATP:dTDP phosphotransferase[n]	m01753[n] + m01285[n] <==> m01747[n] + m01371[n]	191575 or 83782			Nucleotide metabolism	1	-1000	1000	0	1	2.7.4.6		PMID7050910
RCR11212	ATP:dIDP phosphotransferase[m]	m01714[m] + m01285[m] <==> m01693[m] + m01371[m]	171566 or 191575 or 58964 or 685679 or 688903 or 83782 or 85269			Nucleotide metabolism	1	-1000	1000	0	1	2.7.4.6		PMID9099850
RCR11213	ATP:IDP phosphotransferase[m]	m02193[m] + m01285[m] <==> m02161[m] + m01371[m]	171566 or 191575 or 58964 or 685679 or 688903 or 83782 or 85269			Nucleotide metabolism	1	-1000	1000	0	1	2.7.4.6		PMID9099850
RCR11214	Guanosine 3',5'-cyclic phosphate 5'-nucleotidohydrolase[n]	m01433[n] + m02040[n] --> m02016[n]	171115 or 191569			Nucleotide metabolism	0	0	1000	0	1	3.1.4.35		PMID17307970;PMID9624146
RCR11215	Guanosine 3',5'-cyclic phosphate 5'-nucleotidohydrolase[g]	m01433[g] + m02040[g] --> m02016[g]	171115 or 191569			Nucleotide metabolism	0	0	1000	0	1	3.1.4.17		PMID17307970;PMID9624146
RCR11216	adenosine 3',5'-phosphate 5'-nucleotidohydrolase[g]	m01419[g] + m02040[g] --> m01334[g]	2462 or 24627 or 25638 or 290646			Nucleotide metabolism	0	0	1000	0	1	3.1.4.17		PMID17307970
RCR11217	ADP-glucose glucose-1-phosphohydrolase	m01286[c] + m02040[c] --> m01967[c] + m01334[c]	287406 or 305149 or 361274			Nucleotide metabolism	0	0	1000	0	1	3.6.1.13
RCR11218	ADPmannose sugarphosphohydrolase	m01287[c] + m02040[c] --> m02454[c] + m01334[c]	287406 or 305149 or 361274			Nucleotide metabolism	0	0	1000	0	1	3.6.1.13
RCR11219	ATP:cytidine 5'-phosphotransferase[m]	m01630[m] + m01371[m] --> m01590[m] + m01285[m]	304944 or 311864 or 499956			Nucleotide metabolism	0	0	1000	0	1
RCR11220	cytidylate kinase (dCMP,dGTP),nuclear	m01680[c] + m01643[c] <==> m01688[c] + m01644[c]	298410			Nucleotide metabolism	1	-1000	1000	0	1	2.7.4.14		PMID10462544;PMID11912132
RCR11221	cytidylate kinase (dCMP,dCTP),nuclear	2 m01643[c] <==> m01645[c] + m01644[c]	298410			Nucleotide metabolism	1	-1000	1000	0	1	2.7.4.14		PMID10462544;PMID11912132
RCR11222	cytidylate kinase (dCMP,dATP),nuclear	m01643[c] + m01637[c] <==> m01644[c] + m01642[c]	298410			Nucleotide metabolism	1	-1000	1000	0	1	2.7.4.14		PMID10462544;PMID11912132
RCR11223	cytidylate kinase (dCMP,CTP),nuclear	m01643[c] + m03106[c] <==> m01644[c] + m03130[c]	298410			Nucleotide metabolism	1	-1000	1000	0	1	2.7.4.14		PMID10462544;PMID11912132
RCR11224	cytidylate kinase (dCMP)(GTP)	m01424[n] + m01643[n] <==> m01644[n] + m01623[n]	298410			Nucleotide metabolism	1	-1000	1000	0	1	2.7.4.14		PMID10462544;PMID11912132
RCR11225	cytidylate kinase (dCMP,GTP),nuclear	m01643[c] + m01948[c] <==> m01644[c] + m02034[c]	365985			Nucleotide metabolism	1	-1000	1000	0	1	2.7.4.3		PMID10215863
RCR11226	cytidylate kinase (dCMP)	m01643[n] + m01948[n] <==> m01644[n] + m02034[n]	298410			Nucleotide metabolism	1	-1000	1000	0	1	2.7.4.14		PMID10462544;PMID11912132
RCR11227	cytidylate kinase (CMP),nuclear	m01424[c] + m01643[c] <==> m01644[c] + m01623[c]	298410			Nucleotide metabolism	1	-1000	1000	0	1	2.7.4.14		PMID10462544;PMID11912132
RCR11228	cytidylate kinase (CMP,CTP)	m01424[n] + m01948[n] <==> m02034[n] + m01590[n]	298410			Nucleotide metabolism	1	-1000	1000	0	1	2.7.4.14		PMID10462544
RCR11229	cytidylate kinase (CMP,CTP),nuclear	2 m01424[c] <==> m01623[c] + m01590[c]	298410			Nucleotide metabolism	1	-1000	1000	0	1	2.7.4.14		PMID10462544;PMID11912132
RCR11230	cytidylate kinase (CMP,UTP)	2 m01424[n] <==> m01623[n] + m01590[n]	298410			Nucleotide metabolism	1	-1000	1000	0	1	2.7.4.14		PMID10462544;PMID11912132
RCR11231	cytidylate kinase (CMP,UTP),nuclear	m01424[c] + m03106[c] <==> m03130[c] + m01590[c]	298410			Nucleotide metabolism	1	-1000	1000	0	1	2.7.4.14		PMID10462544;PMID11912132
RCR11232	deoyguanosine transport in mitochondria	m01680[m] + m01637[m] <==> m01686[m] + m01642[m]				Nucleotide metabolism	1	-1000	1000	0	1
RCR11233	thioredoxin reductase (NADPH)	m02666[m] + m02555[m] + m02039[m] --> m02990[m] + m02554[m]	50551 or 58819 or 297437			Nucleotide metabolism	0	0	1000	0	1	1.8.1.9		PMID10215850;PMID11259642;PMID12705894
RCR11234	ATP:inosine 5'-phosphotransferase	m02170[m] + m01371[m] --> m02167[m] + m01285[m]				Nucleotide metabolism	0	0	1000	0	1
RCR11235	UDP phosphohydrolase[g]	m03106[g] + m02040[g] --> m03114[g] + m02751[g]	246272 or 85260 or 361063			Nucleotide metabolism	0	0	1000	0	1	3.6.1.6
RCR11236	XTP pyrophosphohydrolase	m03154[c] + m02040[c] --> m03150[c] + m02759[c]	311422			Nucleotide metabolism	0	0	1000	0	1	3.6.1.19
RCR11237	2'-deoxyadenosine 5'-monophosphate phosphohydrolase	m01639[l] + m02040[l] --> m01666[l] + m02751[l]	24162			Nucleotide metabolism	0	0	1000	0	1	3.1.3.2
RCR11238	2'-deoxyguanosine 5'-monophosphate phosphohydrolase	m01686[l] + m02040[l] --> m01669[l] + m02751[l]	24162			Nucleotide metabolism	0	0	1000	0	1	3.1.3.2
RCR11239	L-glutamate:NAD+ oxidoreductase (deaminating)	m01306[m] + m02578[m] + m02553[m] + m02039[m] <==> m01974[m] + m02552[m] + m02040[m]	24399			Alanine aspartate and glutamate metabolism	1	-1000	1000	0	1	1.4.1.3		PMID:11254391;PMID:3377777
RCR11240	L-Glutamate:NADP+ oxidoreductase (deaminating)	m01306[m] + m02578[m] + m02555[m] + m02039[m] <==> m01974[m] + m02554[m] + m02040[m]	24399			Alanine aspartate and glutamate metabolism	1	-1000	1000	0	1	1.4.1.3		PMID:11254391;PMID:3377777
RCR11241	L-Citrulline:L-aspartate ligase (AMP-forming)	m01588[c] + m01370[c] + m01371[c] --> m01366[c] + m01334[c] + m02759[c]	25698			Alanine aspartate and glutamate metabolism	0	0	1000	0	1	6.3.4.5		PMID:12055339;PMID:518841;PMID:6194510;PMID:650761;PMID:652976;PMID:7776957
RCR11242	2-(Nomega-L-arginino)succinate arginine-lyase (fumarate-forming)	m01862[c] + m01365[c] <==> m01366[c]	114205 or 59085			Alanine aspartate and glutamate metabolism	1	-1000	1000	0	1	4.3.2.1		PMID:11092456;PMID:12055339
RCR11243	(S)-1-pyrroline-5-carboxylate:NAD+ oxidoreductase	m00559[m] + m02552[m] + 2 m02040[m] --> m01974[m] + m02553[m] + m02039[m]	641316			Alanine aspartate and glutamate metabolism	0	0	1000	0	1	1.5.1.12
RCR11244	L-Aspartate:2-oxoglutarate aminotransferase[m]	m01370[m] + m01306[m] <==> m02633[m] + m01974[m]	25721			Alanine aspartate and glutamate metabolism	1	-1000	1000	0	1	2.6.1.1		PMID:3207426;PMID:7499788;PMID:7719646
[truncated: 7,291 more rows]

## Sheet: compartment definitions
Compartment	Definition
c	cytosol
g	golgi apparatus
l	lysosome
m	mitochondria
n	nucleus
p	peroxisome
r	endoplasmic reticulum
s	extracellular space

## Sheet: modifications
Modification made to the original rat genome scale metaboic reconstruction (iRno)
[truncated: 212 more rows]
